# Supplementary material for: Comprehensive Volumetric Analysis of Mecp2-Null Mouse Model for Rett Syndrome by T2-Weighted 3D Magnetic Resonance Imaging
Source: Front Neurosci. 2022 May 10;16:885335. doi: 10.3389/fnins.2022.885335 (PMC9127869; doi:10.3389/fnins.2022.885335)
Supplement: Supplementary file 2 [file Table_1.xlsx]

## Sheet: Sheet1
Supplementary Table 5. Calculated regional brain volume (processing pipeline 2; Mann Whitney U test, FDR adjustment)
		Red indicates significance.			n = 4 mice per group.
Brain area (pipeline 2)	M-W U test	FDR q=0.2	FDR q=0.1	FDR q=0.05	FDR q=0.02	FDR q=0.01
Somatomotor areas	0.029	0.000299401	0.000149701	7.48503e-05	2.99401e-05	1.49701e-05
Primary motor area	0.029	0.000598802	0.000299401	0.000149701	5.98802e-05	2.99401e-05
Primary motor area, Layer 1	0.029	0.000898204	0.000449102	0.000224551	8.98204e-05	4.49102e-05
Primary motor area, Layer 2/3	0.029	0.0011976	0.000598802	0.000299401	0.00011976	5.98802e-05
Primary motor area, Layer 5	0.029	0.00149701	0.000748503	0.000374251	0.000149701	7.48503e-05
Primary motor area, Layer 6a	0.029	0.00179641	0.000898204	0.000449102	0.000179641	8.98204e-05
Primary motor area, Layer 6b	0.029	0.00209581	0.0010479	0.000523952	0.000209581	0.00010479
Secondary motor area	0.029	0.00239521	0.0011976	0.000598802	0.000239521	0.00011976
Secondary motor area, layer 1	0.029	0.00269461	0.00134731	0.000673653	0.000269461	0.000134731
Secondary motor area, layer 2/3	0.029	0.00299401	0.00149701	0.000748503	0.000299401	0.000149701
Secondary motor area, layer 5	0.029	0.00329341	0.00164671	0.000823353	0.000329341	0.000164671
Secondary motor area, layer 6a	0.029	0.00359281	0.00179641	0.000898204	0.000359281	0.000179641
Secondary motor area, layer 6b	0.029	0.00389222	0.00194611	0.000973054	0.000389222	0.000194611
Somatosensory areas	0.029	0.00419162	0.00209581	0.0010479	0.000419162	0.000209581
Primary somatosensory area	0.029	0.00449102	0.00224551	0.00112275	0.000449102	0.000224551
Primary somatosensory area, nose	0.029	0.00479042	0.00239521	0.0011976	0.000479042	0.000239521
Primary somatosensory area, nose, layer 1	0.029	0.00508982	0.00254491	0.00127246	0.000508982	0.000254491
Primary somatosensory area, nose, layer 2/3	0.029	0.00538922	0.00269461	0.00134731	0.000538922	0.000269461
Primary somatosensory area, nose, layer 4	0.029	0.00568862	0.00284431	0.00142216	0.000568862	0.000284431
Primary somatosensory area, nose, layer 5	0.029	0.00598802	0.00299401	0.00149701	0.000598802	0.000299401
Primary somatosensory area, nose, layer 6a	0.029	0.00628743	0.00314371	0.00157186	0.000628743	0.000314371
Primary somatosensory area, nose, layer 6b	0.029	0.00658683	0.00329341	0.00164671	0.000658683	0.000329341
Primary somatosensory area, barrel field	0.029	0.00688623	0.00344311	0.00172156	0.000688623	0.000344311
Primary somatosensory area, barrel field, layer 1	0.029	0.00718563	0.00359281	0.00179641	0.000718563	0.000359281
Primary somatosensory area, barrel field, layer 2/3	0.029	0.00748503	0.00374251	0.00187126	0.000748503	0.000374251
Primary somatosensory area, barrel field, layer 4	0.029	0.00778443	0.00389222	0.00194611	0.000778443	0.000389222
Primary somatosensory area, barrel field, layer 5	0.029	0.00808383	0.00404192	0.00202096	0.000808383	0.000404192
Primary somatosensory area, barrel field, layer 6a	0.029	0.00838323	0.00419162	0.00209581	0.000838323	0.000419162
Primary somatosensory area, barrel field, layer 6b	0.029	0.00868263	0.00434132	0.00217066	0.000868263	0.000434132
Primary somatosensory area, lower limb	0.029	0.00898204	0.00449102	0.00224551	0.000898204	0.000449102
Primary somatosensory area, lower limb, layer 1	0.029	0.00928144	0.00464072	0.00232036	0.000928144	0.000464072
Primary somatosensory area, lower limb, layer 2/3	0.029	0.00958084	0.00479042	0.00239521	0.000958084	0.000479042
Primary somatosensory area, lower limb, layer 4	0.029	0.00988024	0.00494012	0.00247006	0.000988024	0.000494012
Primary somatosensory area, lower limb, layer 5	0.029	0.0101796	0.00508982	0.00254491	0.00101796	0.000508982
Primary somatosensory area, lower limb, layer 6a	0.029	0.010479	0.00523952	0.00261976	0.0010479	0.000523952
Primary somatosensory area, lower limb, layer 6b	0.029	0.0107784	0.00538922	0.00269461	0.00107784	0.000538922
Primary somatosensory area, mouth	0.029	0.0110778	0.00553892	0.00276946	0.00110778	0.000553892
Primary somatosensory area, mouth, layer 1	0.029	0.0113772	0.00568862	0.00284431	0.00113772	0.000568862
Primary somatosensory area, mouth, layer 2/3	0.029	0.0116766	0.00583832	0.00291916	0.00116766	0.000583832
Primary somatosensory area, mouth, layer 4	0.029	0.011976	0.00598802	0.00299401	0.0011976	0.000598802
Primary somatosensory area, mouth, layer 5	0.029	0.0122754	0.00613772	0.00306886	0.00122754	0.000613772
Primary somatosensory area, mouth, layer 6a	0.029	0.0125749	0.00628743	0.00314371	0.00125749	0.000628743
Primary somatosensory area, mouth, layer 6b	0.029	0.0128743	0.00643713	0.00321856	0.00128743	0.000643713
Primary somatosensory area, upper limb	0.029	0.0131737	0.00658683	0.00329341	0.00131737	0.000658683
Primary somatosensory area, upper limb, layer 1	0.029	0.0134731	0.00673653	0.00336826	0.00134731	0.000673653
Primary somatosensory area, upper limb, layer 2/3	0.029	0.0137725	0.00688623	0.00344311	0.00137725	0.000688623
Primary somatosensory area, upper limb, layer 4	0.029	0.0140719	0.00703593	0.00351796	0.00140719	0.000703593
Primary somatosensory area, upper limb, layer 5	0.029	0.0143713	0.00718563	0.00359281	0.00143713	0.000718563
Primary somatosensory area, upper limb, layer 6a	0.029	0.0146707	0.00733533	0.00366766	0.00146707	0.000733533
Primary somatosensory area, upper limb, layer 6b	0.029	0.0149701	0.00748503	0.00374251	0.00149701	0.000748503
Primary somatosensory area, trunk	0.029	0.0152695	0.00763473	0.00381737	0.00152695	0.000763473
Primary somatosensory area, trunk, layer 1	0.029	0.0155689	0.00778443	0.00389222	0.00155689	0.000778443
Primary somatosensory area, trunk, layer 2/3	0.029	0.0158683	0.00793413	0.00396707	0.00158683	0.000793413
Primary somatosensory area, trunk, layer 4	0.029	0.0161677	0.00808383	0.00404192	0.00161677	0.000808383
Primary somatosensory area, trunk, layer 5	0.029	0.0164671	0.00823353	0.00411677	0.00164671	0.000823353
Primary somatosensory area, trunk, layer 6a	0.029	0.0167665	0.00838323	0.00419162	0.00167665	0.000838323
Primary somatosensory area, trunk, layer 6b	0.029	0.0170659	0.00853293	0.00426647	0.00170659	0.000853293
Primary somatosensory area, unassigned	0.029	0.0173653	0.00868263	0.00434132	0.00173653	0.000868263
Primary somatosensory area, unassigned, layer 1	0.029	0.0176647	0.00883234	0.00441617	0.00176647	0.000883234
Primary somatosensory area, unassigned, layer 2/3	0.029	0.0179641	0.00898204	0.00449102	0.00179641	0.000898204
Primary somatosensory area, unassigned, layer 4	0.029	0.0182635	0.00913174	0.00456587	0.00182635	0.000913174
Primary somatosensory area, unassigned, layer 5	0.029	0.0185629	0.00928144	0.00464072	0.00185629	0.000928144
Primary somatosensory area, unassigned, layer 6a	0.029	0.0188623	0.00943114	0.00471557	0.00188623	0.000943114
Primary somatosensory area, unassigned, layer 6b	0.029	0.0191617	0.00958084	0.00479042	0.00191617	0.000958084
Supplemental somatosensory area	0.029	0.0194611	0.00973054	0.00486527	0.00194611	0.000973054
Supplemental somatosensory area, layer 1	0.029	0.0197605	0.00988024	0.00494012	0.00197605	0.000988024
Supplemental somatosensory area, layer 2/3	0.029	0.0200599	0.0100299	0.00501497	0.00200599	0.00100299
Supplemental somatosensory area, layer 4	0.029	0.0203593	0.0101796	0.00508982	0.00203593	0.00101796
Supplemental somatosensory area, layer 5	0.029	0.0206587	0.0103293	0.00516467	0.00206587	0.00103293
Supplemental somatosensory area, layer 6a	0.029	0.0209581	0.010479	0.00523952	0.00209581	0.0010479
Supplemental somatosensory area, layer 6b	0.029	0.0212575	0.0106287	0.00531437	0.00212575	0.00106287
Gustatory areas	0.029	0.0215569	0.0107784	0.00538922	0.00215569	0.00107784
Gustatory areas, layer 1	0.029	0.0218563	0.0109281	0.00546407	0.00218563	0.00109281
Gustatory areas, layer 2/3	0.029	0.0221557	0.0110778	0.00553892	0.00221557	0.00110778
Gustatory areas, layer 4	0.029	0.0224551	0.0112275	0.00561377	0.00224551	0.00112275
Gustatory areas, layer 5	0.029	0.0227545	0.0113772	0.00568862	0.00227545	0.00113772
Gustatory areas, layer 6a	0.029	0.0230539	0.0115269	0.00576347	0.00230539	0.00115269
Gustatory areas, layer 6b	0.029	0.0233533	0.0116766	0.00583832	0.00233533	0.00116766
Visceral area	0.029	0.0236527	0.0118263	0.00591317	0.00236527	0.00118263
Visceral area, layer 1	0.029	0.0239521	0.011976	0.00598802	0.00239521	0.0011976
Visceral area, layer 2/3	0.029	0.0242515	0.0121257	0.00606287	0.00242515	0.00121257
Visceral area, layer 4	0.029	0.0245509	0.0122754	0.00613772	0.00245509	0.00122754
Visceral area, layer 5	0.029	0.0248503	0.0124251	0.00621257	0.00248503	0.00124251
Visceral area, layer 6a	0.029	0.0251497	0.0125749	0.00628743	0.00251497	0.00125749
Visceral area, layer 6b	0.029	0.0254491	0.0127246	0.00636228	0.00254491	0.00127246
Auditory areas	0.029	0.0257485	0.0128743	0.00643713	0.00257485	0.00128743
Dorsal auditory area	0.029	0.0260479	0.013024	0.00651198	0.00260479	0.0013024
Dorsal auditory area, layer 1	0.029	0.0263473	0.0131737	0.00658683	0.00263473	0.00131737
Dorsal auditory area, layer 2/3	0.029	0.0266467	0.0133234	0.00666168	0.00266467	0.00133234
Dorsal auditory area, layer 4	0.029	0.0269461	0.0134731	0.00673653	0.00269461	0.00134731
Dorsal auditory area, layer 5	0.029	0.0272455	0.0136228	0.00681138	0.00272455	0.00136228
Dorsal auditory area, layer 6a	0.029	0.0275449	0.0137725	0.00688623	0.00275449	0.00137725
Dorsal auditory area, layer 6b	0.029	0.0278443	0.0139222	0.00696108	0.00278443	0.00139222
Primary auditory area	0.029	0.0281437	0.0140719	0.00703593	0.00281437	0.00140719
Primary auditory area, layer 1	0.029	0.0284431	0.0142216	0.00711078	0.00284431	0.00142216
Primary auditory area, layer 2/3	0.029	0.0287425	0.0143713	0.00718563	0.00287425	0.00143713
Primary auditory area, layer 4	0.029	0.0290419	0.014521	0.00726048	0.00290419	0.0014521
Primary auditory area, layer 5	0.029	0.0293413	0.0146707	0.00733533	0.00293413	0.00146707
Primary auditory area, layer 6a	0.029	0.0296407	0.0148204	0.00741018	0.00296407	0.00148204
Primary auditory area, layer 6b	0.029	0.0299401	0.0149701	0.00748503	0.00299401	0.00149701
Posterior auditory area	0.029	0.0302395	0.0151198	0.00755988	0.00302395	0.00151198
Posterior auditory area, layer 2/3	0.029	0.0305389	0.0152695	0.00763473	0.00305389	0.00152695
Posterior auditory area, layer 5	0.029	0.0308383	0.0154192	0.00770958	0.00308383	0.00154192
Ventral auditory area	0.029	0.0311377	0.0155689	0.00778443	0.00311377	0.00155689
Ventral auditory area, layer 1	0.029	0.0314371	0.0157186	0.00785928	0.00314371	0.00157186
Ventral auditory area, layer 2/3	0.029	0.0317365	0.0158683	0.00793413	0.00317365	0.00158683
Ventral auditory area, layer 4	0.029	0.0320359	0.016018	0.00800898	0.00320359	0.0016018
Ventral auditory area, layer 5	0.029	0.0323353	0.0161677	0.00808383	0.00323353	0.00161677
Ventral auditory area, layer 6a	0.029	0.0326347	0.0163174	0.00815868	0.00326347	0.00163174
Ventral auditory area, layer 6b	0.029	0.0329341	0.0164671	0.00823353	0.00329341	0.00164671
Visual areas	0.029	0.0332335	0.0166168	0.00830838	0.00332335	0.00166168
Anterolateral visual area	0.029	0.0335329	0.0167665	0.00838323	0.00335329	0.00167665
Anterolateral visual area, layer 1	0.029	0.0338323	0.0169162	0.00845808	0.00338323	0.00169162
Anterolateral visual area, layer 2/3	0.029	0.0341317	0.0170659	0.00853293	0.00341317	0.00170659
Anterolateral visual area, layer 4	0.029	0.0344311	0.0172156	0.00860778	0.00344311	0.00172156
Anterolateral visual area, layer 5	0.029	0.0347305	0.0173653	0.00868263	0.00347305	0.00173653
Anterolateral visual area, layer 6a	0.029	0.0350299	0.017515	0.00875749	0.00350299	0.0017515
Anterolateral visual area, layer 6b	0.029	0.0353293	0.0176647	0.00883234	0.00353293	0.00176647
Anteromedial visual area	0.029	0.0356287	0.0178144	0.00890719	0.00356287	0.00178144
Anteromedial visual area, layer 1	0.029	0.0359281	0.0179641	0.00898204	0.00359281	0.00179641
Anteromedial visual area, layer 2/3	0.029	0.0362275	0.0181138	0.00905689	0.00362275	0.00181138
Anteromedial visual area, layer 4	0.029	0.0365269	0.0182635	0.00913174	0.00365269	0.00182635
Anteromedial visual area, layer 5	0.029	0.0368263	0.0184132	0.00920659	0.00368263	0.00184132
Anteromedial visual area, layer 6a	0.029	0.0371257	0.0185629	0.00928144	0.00371257	0.00185629
Anteromedial visual area, layer 6b	0.029	0.0374251	0.0187126	0.00935629	0.00374251	0.00187126
Lateral visual area	0.029	0.0377246	0.0188623	0.00943114	0.00377246	0.00188623
Lateral visual area, layer 1	0.029	0.038024	0.019012	0.00950599	0.0038024	0.0019012
Lateral visual area, layer 4	0.029	0.0383234	0.0191617	0.00958084	0.00383234	0.00191617
Lateral visual area, layer 5	0.029	0.0386228	0.0193114	0.00965569	0.00386228	0.00193114
Lateral visual area, layer 6a	0.029	0.0389222	0.0194611	0.00973054	0.00389222	0.00194611
Primary visual area	0.029	0.0392216	0.0196108	0.00980539	0.00392216	0.00196108
Primary visual area, layer 1	0.029	0.039521	0.0197605	0.00988024	0.0039521	0.00197605
Primary visual area, layer 2/3	0.029	0.0398204	0.0199102	0.00995509	0.00398204	0.00199102
Primary visual area, layer 4	0.029	0.0401198	0.0200599	0.0100299	0.00401198	0.00200599
Primary visual area, layer 5	0.029	0.0404192	0.0202096	0.0101048	0.00404192	0.00202096
Primary visual area, layer 6a	0.029	0.0407186	0.0203593	0.0101796	0.00407186	0.00203593
Primary visual area, layer 6b	0.029	0.041018	0.020509	0.0102545	0.0041018	0.0020509
Posterolateral visual area, layer 1	0.029	0.0413174	0.0206587	0.0103293	0.00413174	0.00206587
Posterolateral visual area, layer 5	0.029	0.0416168	0.0208084	0.0104042	0.00416168	0.00208084
Posterolateral visual area, layer 6b	0.029	0.0419162	0.0209581	0.010479	0.00419162	0.00209581
posteromedial visual area	0.029	0.0422156	0.0211078	0.0105539	0.00422156	0.00211078
posteromedial visual area, layer 2/3	0.029	0.042515	0.0212575	0.0106287	0.0042515	0.00212575
posteromedial visual area, layer 4	0.029	0.0428144	0.0214072	0.0107036	0.00428144	0.00214072
posteromedial visual area, layer 5	0.029	0.0431138	0.0215569	0.0107784	0.00431138	0.00215569
posteromedial visual area, layer 6b	0.029	0.0434132	0.0217066	0.0108533	0.00434132	0.00217066
Anterior cingulate area	0.029	0.0437126	0.0218563	0.0109281	0.00437126	0.00218563
Anterior cingulate area, dorsal part	0.029	0.044012	0.022006	0.011003	0.0044012	0.0022006
Anterior cingulate area, dorsal part, layer 1	0.029	0.0443114	0.0221557	0.0110778	0.00443114	0.00221557
Anterior cingulate area, dorsal part, layer 2/3	0.029	0.0446108	0.0223054	0.0111527	0.00446108	0.00223054
Anterior cingulate area, dorsal part, layer 5	0.029	0.0449102	0.0224551	0.0112275	0.00449102	0.00224551
Anterior cingulate area, dorsal part, layer 6a	0.029	0.0452096	0.0226048	0.0113024	0.00452096	0.00226048
Anterior cingulate area, dorsal part, layer 6b	0.029	0.045509	0.0227545	0.0113772	0.0045509	0.00227545
Anterior cingulate area, ventral part	0.029	0.0458084	0.0229042	0.0114521	0.00458084	0.00229042
Anterior cingulate area, ventral part, layer 1	0.029	0.0461078	0.0230539	0.0115269	0.00461078	0.00230539
Anterior cingulate area, ventral part, layer 2/3	0.029	0.0464072	0.0232036	0.0116018	0.00464072	0.00232036
Anterior cingulate area, ventral part, 6a	0.029	0.0467066	0.0233533	0.0116766	0.00467066	0.00233533
Anterior cingulate area, ventral part, 6b	0.029	0.047006	0.023503	0.0117515	0.0047006	0.0023503
Agranular insular area	0.029	0.0473054	0.0236527	0.0118263	0.00473054	0.00236527
Agranular insular area, dorsal part	0.029	0.0476048	0.0238024	0.0119012	0.00476048	0.00238024
Agranular insular area, dorsal part, layer 1	0.029	0.0479042	0.0239521	0.011976	0.00479042	0.00239521
Agranular insular area, dorsal part, layer 2/3	0.029	0.0482036	0.0241018	0.0120509	0.00482036	0.00241018
Agranular insular area, dorsal part, layer 5	0.029	0.048503	0.0242515	0.0121257	0.0048503	0.00242515
Agranular insular area, dorsal part, layer 6a	0.029	0.0488024	0.0244012	0.0122006	0.00488024	0.00244012
Agranular insular area, posterior part	0.029	0.0491018	0.0245509	0.0122754	0.00491018	0.00245509
Agranular insular area, posterior part, layer 1	0.029	0.0494012	0.0247006	0.0123503	0.00494012	0.00247006
Agranular insular area, posterior part, layer 2/3	0.029	0.0497006	0.0248503	0.0124251	0.00497006	0.00248503
Agranular insular area, posterior part, layer 5	0.029	0.05	0.025	0.0125	0.005	0.0025
Agranular insular area, posterior part, layer 6a	0.029	0.0502994	0.0251497	0.0125749	0.00502994	0.00251497
Agranular insular area, ventral part	0.029	0.0505988	0.0252994	0.0126497	0.00505988	0.00252994
Agranular insular area, ventral part, layer 1	0.029	0.0508982	0.0254491	0.0127246	0.00508982	0.00254491
Agranular insular area, ventral part, layer 2/3	0.029	0.0511976	0.0255988	0.0127994	0.00511976	0.00255988
Agranular insular area, ventral part, layer 5	0.029	0.051497	0.0257485	0.0128743	0.0051497	0.00257485
Agranular insular area, ventral part, layer 6a	0.029	0.0517964	0.0258982	0.0129491	0.00517964	0.00258982
Retrosplenial area	0.029	0.0520958	0.0260479	0.013024	0.00520958	0.00260479
Retrosplenial area, lateral agranular part	0.029	0.0523952	0.0261976	0.0130988	0.00523952	0.00261976
Retrosplenial area, lateral agranular part, layer 1	0.029	0.0526946	0.0263473	0.0131737	0.00526946	0.00263473
Retrosplenial area, lateral agranular part, layer 2/3	0.029	0.052994	0.026497	0.0132485	0.0052994	0.0026497
Retrosplenial area, lateral agranular part, layer 5	0.029	0.0532934	0.0266467	0.0133234	0.00532934	0.00266467
Retrosplenial area, lateral agranular part, layer 6a	0.029	0.0535928	0.0267964	0.0133982	0.00535928	0.00267964
Retrosplenial area, dorsal part	0.029	0.0538922	0.0269461	0.0134731	0.00538922	0.00269461
Retrosplenial area, dorsal part, layer 1	0.029	0.0541916	0.0270958	0.0135479	0.00541916	0.00270958
Retrosplenial area, dorsal part, layer 2/3	0.029	0.054491	0.0272455	0.0136228	0.0054491	0.00272455
Retrosplenial area, dorsal part, layer 5	0.029	0.0547904	0.0273952	0.0136976	0.00547904	0.00273952
Retrosplenial area, dorsal part, layer 6a	0.029	0.0550898	0.0275449	0.0137725	0.00550898	0.00275449
Retrosplenial area, dorsal part, layer 6b	0.029	0.0553892	0.0276946	0.0138473	0.00553892	0.00276946
Retrosplenial area, ventral part	0.029	0.0556886	0.0278443	0.0139222	0.00556886	0.00278443
Retrosplenial area, ventral part, layer 1	0.029	0.055988	0.027994	0.013997	0.0055988	0.0027994
Retrosplenial area, ventral part, layer 2	0.029	0.0562874	0.0281437	0.0140719	0.00562874	0.00281437
Retrosplenial area, ventral part, layer 2/3	0.029	0.0565868	0.0282934	0.0141467	0.00565868	0.00282934
Retrosplenial area, ventral part, layer 5	0.029	0.0568862	0.0284431	0.0142216	0.00568862	0.00284431
Retrosplenial area, ventral part, layer 6a	0.029	0.0571856	0.0285928	0.0142964	0.00571856	0.00285928
Retrosplenial area, ventral part, layer 6b	0.029	0.057485	0.0287425	0.0143713	0.0057485	0.00287425
Posterior parietal association areas	0.029	0.0577844	0.0288922	0.0144461	0.00577844	0.00288922
Posterior parietal association areas, layer 1	0.029	0.0580838	0.0290419	0.014521	0.00580838	0.00290419
Posterior parietal association areas, layer 2/3	0.029	0.0583832	0.0291916	0.0145958	0.00583832	0.00291916
Posterior parietal association areas, layer 4	0.029	0.0586826	0.0293413	0.0146707	0.00586826	0.00293413
Posterior parietal association areas, layer 5	0.029	0.058982	0.029491	0.0147455	0.0058982	0.0029491
Posterior parietal association areas, layer 6a	0.029	0.0592814	0.0296407	0.0148204	0.00592814	0.00296407
Posterior parietal association areas, layer 6b	0.029	0.0595808	0.0297904	0.0148952	0.00595808	0.00297904
Temporal association areas	0.029	0.0598802	0.0299401	0.0149701	0.00598802	0.00299401
Temporal association areas, layer 1	0.029	0.0601796	0.0300898	0.0150449	0.00601796	0.00300898
Temporal association areas, layer 2/3	0.029	0.060479	0.0302395	0.0151198	0.0060479	0.00302395
Temporal association areas, layer 4	0.029	0.0607784	0.0303892	0.0151946	0.00607784	0.00303892
Temporal association areas, layer 5	0.029	0.0610778	0.0305389	0.0152695	0.00610778	0.00305389
Temporal association areas, layer 6a	0.029	0.0613772	0.0306886	0.0153443	0.00613772	0.00306886
Temporal association areas, layer 6b	0.029	0.0616766	0.0308383	0.0154192	0.00616766	0.00308383
Perirhinal area	0.029	0.061976	0.030988	0.015494	0.0061976	0.0030988
Perirhinal area, layer 6a	0.029	0.0622754	0.0311377	0.0155689	0.00622754	0.00311377
Perirhinal area, layer 1	0.029	0.0625749	0.0312874	0.0156437	0.00625749	0.00312874
Perirhinal area, layer 5	0.029	0.0628743	0.0314371	0.0157186	0.00628743	0.00314371
Perirhinal area, layer 2/3	0.029	0.0631737	0.0315868	0.0157934	0.00631737	0.00315868
Ectorhinal area	0.029	0.0634731	0.0317365	0.0158683	0.00634731	0.00317365
Ectorhinal area/Layer 1	0.029	0.0637725	0.0318862	0.0159431	0.00637725	0.00318862
Ectorhinal area/Layer 2/3	0.029	0.0640719	0.0320359	0.016018	0.00640719	0.00320359
Ectorhinal area/Layer 5	0.029	0.0643713	0.0321856	0.0160928	0.00643713	0.00321856
Ectorhinal area/Layer 6b	0.029	0.0646707	0.0323353	0.0161677	0.00646707	0.00323353
Hippocampal formation	0.029	0.0649701	0.032485	0.0162425	0.00649701	0.0032485
Hippocampal region	0.029	0.0652695	0.0326347	0.0163174	0.00652695	0.00326347
Ammon's horn	0.029	0.0655689	0.0327844	0.0163922	0.00655689	0.00327844
Field CA1	0.029	0.0658683	0.0329341	0.0164671	0.00658683	0.00329341
Field CA1, stratum lacunosum-moleculare	0.029	0.0661677	0.0330838	0.0165419	0.00661677	0.00330838
Field CA1, stratum oriens	0.029	0.0664671	0.0332335	0.0166168	0.00664671	0.00332335
Field CA1, pyramidal layer	0.029	0.0667665	0.0333832	0.0166916	0.00667665	0.00333832
Field CA1, stratum radiatum	0.029	0.0670659	0.0335329	0.0167665	0.00670659	0.00335329
Field CA2	0.029	0.0673653	0.0336826	0.0168413	0.00673653	0.00336826
Field CA2, stratum lacunosum-moleculare	0.029	0.0676647	0.0338323	0.0169162	0.00676647	0.00338323
Field CA2, stratum oriens	0.029	0.0679641	0.033982	0.016991	0.00679641	0.0033982
Field CA2, pyramidal layer	0.029	0.0682635	0.0341317	0.0170659	0.00682635	0.00341317
Field CA2, stratum radiatum	0.029	0.0685629	0.0342814	0.0171407	0.00685629	0.00342814
Field CA3	0.029	0.0688623	0.0344311	0.0172156	0.00688623	0.00344311
Field CA3, stratum lucidum	0.029	0.0691617	0.0345808	0.0172904	0.00691617	0.00345808
Field CA3, stratum oriens	0.029	0.0694611	0.0347305	0.0173653	0.00694611	0.00347305
Field CA3, pyramidal layer	0.029	0.0697605	0.0348802	0.0174401	0.00697605	0.00348802
Field CA3, stratum radiatum	0.029	0.0700599	0.0350299	0.017515	0.00700599	0.00350299
Dentate gyrus	0.029	0.0703593	0.0351796	0.0175898	0.00703593	0.00351796
Dentate gyrus, molecular layer	0.029	0.0706587	0.0353293	0.0176647	0.00706587	0.00353293
Dentate gyrus, polymorph layer	0.029	0.0709581	0.035479	0.0177395	0.00709581	0.0035479
Dentate gyrus, granule cell layer	0.029	0.0712575	0.0356287	0.0178144	0.00712575	0.00356287
Retrohippocampal region	0.029	0.0715569	0.0357784	0.0178892	0.00715569	0.00357784
Entorhinal area	0.029	0.0718563	0.0359281	0.0179641	0.00718563	0.00359281
Entorhinal area, lateral part	0.029	0.0721557	0.0360778	0.0180389	0.00721557	0.00360778
Entorhinal area, lateral part, layer 1	0.029	0.0724551	0.0362275	0.0181138	0.00724551	0.00362275
Entorhinal area, lateral part, layer 2/3	0.029	0.0727545	0.0363772	0.0181886	0.00727545	0.00363772
Entorhinal area, lateral part, layer 2a	0.029	0.0730539	0.0365269	0.0182635	0.00730539	0.00365269
Entorhinal area, lateral part, layer 3	0.029	0.0733533	0.0366766	0.0183383	0.00733533	0.00366766
Entorhinal area, lateral part, layer 4	0.029	0.0736527	0.0368263	0.0184132	0.00736527	0.00368263
Entorhinal area, lateral part, layer 4/5	0.029	0.0739521	0.036976	0.018488	0.00739521	0.0036976
Entorhinal area, lateral part, layer 5	0.029	0.0742515	0.0371257	0.0185629	0.00742515	0.00371257
Entorhinal area, lateral part, layer 6a	0.029	0.0745509	0.0372754	0.0186377	0.00745509	0.00372754
Entorhinal area, lateral part, layer 6b	0.029	0.0748503	0.0374251	0.0187126	0.00748503	0.00374251
Entorhinal area, medial part, dorsal zone, layer 1	0.029	0.0751497	0.0375749	0.0187874	0.00751497	0.00375749
Entorhinal area, medial part, dorsal zone, layer 4	0.029	0.0754491	0.0377246	0.0188623	0.00754491	0.00377246
Entorhinal area, medial part, dorsal zone, layer 5	0.029	0.0757485	0.0378743	0.0189371	0.00757485	0.00378743
Parasubiculum, layer 3	0.029	0.0760479	0.038024	0.019012	0.00760479	0.0038024
Postsubiculum	0.029	0.0763473	0.0381737	0.0190868	0.00763473	0.00381737
Postsubiculum, layer 1	0.029	0.0766467	0.0383234	0.0191617	0.00766467	0.00383234
Postsubiculum, layer 2	0.029	0.0769461	0.0384731	0.0192365	0.00769461	0.00384731
Postsubiculum, layer 3	0.029	0.0772455	0.0386228	0.0193114	0.00772455	0.00386228
Presubiculum, layer 3	0.029	0.0775449	0.0387725	0.0193862	0.00775449	0.00387725
Subiculum	0.029	0.0778443	0.0389222	0.0194611	0.00778443	0.00389222
Subiculum, dorsal part	0.029	0.0781437	0.0390719	0.0195359	0.00781437	0.00390719
Subiculum, dorsal part, molecular layer	0.029	0.0784431	0.0392216	0.0196108	0.00784431	0.00392216
Subiculum, dorsal part, pyramidal layer	0.029	0.0787425	0.0393713	0.0196856	0.00787425	0.00393713
Subiculum, dorsal part, stratum radiatum	0.029	0.0790419	0.039521	0.0197605	0.00790419	0.0039521
Subiculum, ventral part	0.029	0.0793413	0.0396707	0.0198353	0.00793413	0.00396707
Subiculum, ventral part, molecular layer	0.029	0.0796407	0.0398204	0.0199102	0.00796407	0.00398204
Subiculum, ventral part, pyramidal layer	0.029	0.0799401	0.0399701	0.019985	0.00799401	0.00399701
Cortical subplate	0.029	0.0802395	0.0401198	0.0200599	0.00802395	0.00401198
Claustrum	0.029	0.0805389	0.0402695	0.0201347	0.00805389	0.00402695
Endopiriform nucleus	0.029	0.0808383	0.0404192	0.0202096	0.00808383	0.00404192
Endopiriform nucleus, dorsal part	0.029	0.0811377	0.0405689	0.0202844	0.00811377	0.00405689
Endopiriform nucleus, ventral part	0.029	0.0814371	0.0407186	0.0203593	0.00814371	0.00407186
Lateral amygdalar nucleus	0.029	0.0817365	0.0408683	0.0204341	0.00817365	0.00408683
Basolateral amygdalar nucleus	0.029	0.0820359	0.041018	0.020509	0.00820359	0.0041018
Basolateral amygdalar nucleus, anterior part	0.029	0.0823353	0.0411677	0.0205838	0.00823353	0.00411677
Basolateral amygdalar nucleus, posterior part	0.029	0.0826347	0.0413174	0.0206587	0.00826347	0.00413174
Basomedial amygdalar nucleus	0.029	0.0829341	0.0414671	0.0207335	0.00829341	0.00414671
Basomedial amygdalar nucleus, anterior part	0.029	0.0832335	0.0416168	0.0208084	0.00832335	0.00416168
Striatum	0.029	0.0835329	0.0417665	0.0208832	0.00835329	0.00417665
Striatum dorsal region	0.029	0.0838323	0.0419162	0.0209581	0.00838323	0.00419162
Caudoputamen	0.029	0.0841317	0.0420659	0.0210329	0.00841317	0.00420659
Striatum ventral region	0.029	0.0844311	0.0422156	0.0211078	0.00844311	0.00422156
Nucleus accumbens	0.029	0.0847305	0.0423653	0.0211826	0.00847305	0.00423653
Fundus of striatum	0.029	0.0850299	0.042515	0.0212575	0.00850299	0.0042515
Lateral septal complex	0.029	0.0853293	0.0426647	0.0213323	0.00853293	0.00426647
Lateral septal nucleus	0.029	0.0856287	0.0428144	0.0214072	0.00856287	0.00428144
Lateral septal nucleus, caudal (caudodorsal) part	0.029	0.0859281	0.0429641	0.021482	0.00859281	0.00429641
Lateral septal nucleus, rostral (rostroventral) part	0.029	0.0862275	0.0431138	0.0215569	0.00862275	0.00431138
Lateral septal nucleus, ventral part	0.029	0.0865269	0.0432635	0.0216317	0.00865269	0.00432635
Septofimbrial nucleus	0.029	0.0868263	0.0434132	0.0217066	0.00868263	0.00434132
Striatum-like amygdalar nuclei	0.029	0.0871257	0.0435629	0.0217814	0.00871257	0.00435629
Anterior amygdalar area	0.029	0.0874251	0.0437126	0.0218563	0.00874251	0.00437126
Bed nucleus of the accessory olfactory tract	0.029	0.0877246	0.0438623	0.0219311	0.00877246	0.00438623
Central amygdalar nucleus	0.029	0.088024	0.044012	0.022006	0.0088024	0.0044012
Central amygdalar nucleus, capsular part	0.029	0.0883234	0.0441617	0.0220808	0.00883234	0.00441617
Central amygdalar nucleus, lateral part	0.029	0.0886228	0.0443114	0.0221557	0.00886228	0.00443114
Central amygdalar nucleus, medial part	0.029	0.0889222	0.0444611	0.0222305	0.00889222	0.00444611
Intercalated amygdalar nucleus	0.029	0.0892216	0.0446108	0.0223054	0.00892216	0.00446108
Medial amygdalar nucleus	0.029	0.089521	0.0447605	0.0223802	0.0089521	0.00447605
Medial amygdalar nucleus, anterodorsal part	0.029	0.0898204	0.0449102	0.0224551	0.00898204	0.00449102
Medial amygdalar nucleus, anteroventral part	0.029	0.0901198	0.0450599	0.0225299	0.00901198	0.00450599
Medial amygdalar nucleus, posterodorsal part	0.029	0.0904192	0.0452096	0.0226048	0.00904192	0.00452096
Medial amygdalar nucleus, posterodorsal part, sublayer a	0.029	0.0907186	0.0453593	0.0226796	0.00907186	0.00453593
Medial amygdalar nucleus, posterodorsal part, sublayer c	0.029	0.091018	0.045509	0.0227545	0.0091018	0.0045509
Thalamus	0.029	0.0913174	0.0456587	0.0228293	0.00913174	0.00456587
Thalamus, sensory-motor cortex related	0.029	0.0916168	0.0458084	0.0229042	0.00916168	0.00458084
Ventral group of the dorsal thalamus	0.029	0.0919162	0.0459581	0.022979	0.00919162	0.00459581
Ventral anterior-lateral complex of the thalamus	0.029	0.0922156	0.0461078	0.0230539	0.00922156	0.00461078
Ventral medial nucleus of the thalamus	0.029	0.092515	0.0462575	0.0231287	0.0092515	0.00462575
Ventral posterior complex of the thalamus	0.029	0.0928144	0.0464072	0.0232036	0.00928144	0.00464072
Ventral posterolateral nucleus of the thalamus	0.029	0.0931138	0.0465569	0.0232784	0.00931138	0.00465569
Ventral posterolateral nucleus of the thalamus, parvicellular part	0.029	0.0934132	0.0467066	0.0233533	0.00934132	0.00467066
Ventral posteromedial nucleus of the thalamus	0.029	0.0937126	0.0468563	0.0234281	0.00937126	0.00468563
Ventral posteromedial nucleus of the thalamus, parvicellular part	0.029	0.094012	0.047006	0.023503	0.0094012	0.0047006
Subparafascicular nucleus	0.029	0.0943114	0.0471557	0.0235778	0.00943114	0.00471557
Subparafascicular nucleus, parvicellular part	0.029	0.0946108	0.0473054	0.0236527	0.00946108	0.00473054
Geniculate group, dorsal thalamus	0.029	0.0949102	0.0474551	0.0237275	0.00949102	0.00474551
Medial geniculate complex, dorsal part	0.029	0.0952096	0.0476048	0.0238024	0.00952096	0.00476048
Medial geniculate complex, medial part	0.029	0.095509	0.0477545	0.0238772	0.0095509	0.00477545
Dorsal part of the lateral geniculate complex	0.029	0.0958084	0.0479042	0.0239521	0.00958084	0.00479042
Thalamus, polymodal association cortex related	0.029	0.0961078	0.0480539	0.0240269	0.00961078	0.00480539
Lateral group of the dorsal thalamus	0.029	0.0964072	0.0482036	0.0241018	0.00964072	0.00482036
Lateral posterior nucleus of the thalamus	0.029	0.0967066	0.0483533	0.0241766	0.00967066	0.00483533
Posterior complex of the thalamus	0.029	0.097006	0.048503	0.0242515	0.0097006	0.0048503
Anterior group of the dorsal thalamus	0.029	0.0973054	0.0486527	0.0243263	0.00973054	0.00486527
Anteroventral nucleus of thalamus	0.029	0.0976048	0.0488024	0.0244012	0.00976048	0.00488024
Anteromedial nucleus	0.029	0.0979042	0.0489521	0.024476	0.00979042	0.00489521
Anteromedial nucleus, dorsal part	0.029	0.0982036	0.0491018	0.0245509	0.00982036	0.00491018
Anteromedial nucleus, ventral part	0.029	0.098503	0.0492515	0.0246257	0.0098503	0.00492515
Interanterodorsal nucleus of the thalamus	0.029	0.0988024	0.0494012	0.0247006	0.00988024	0.00494012
Lateral dorsal nucleus of thalamus	0.029	0.0991018	0.0495509	0.0247754	0.00991018	0.00495509
Medial group of the dorsal thalamus	0.029	0.0994012	0.0497006	0.0248503	0.00994012	0.00497006
Mediodorsal nucleus of thalamus	0.029	0.0997006	0.0498503	0.0249251	0.00997006	0.00498503
Mediodorsal nucleus of the thalamus, lateral part	0.029	0.1	0.05	0.025	0.01	0.005
Submedial nucleus of the thalamus	0.029	0.100299	0.0501497	0.0250749	0.0100299	0.00501497
Perireunensis nucleus	0.029	0.100599	0.0502994	0.0251497	0.0100599	0.00502994
Midline group of the dorsal thalamus	0.029	0.100898	0.0504491	0.0252246	0.0100898	0.00504491
Paraventricular nucleus of the thalamus	0.029	0.101198	0.0505988	0.0252994	0.0101198	0.00505988
Parataenial nucleus	0.029	0.101497	0.0507485	0.0253743	0.0101497	0.00507485
Nucleus of reunions	0.029	0.101796	0.0508982	0.0254491	0.0101796	0.00508982
Intralaminar nuclei of the dorsal thalamus	0.029	0.102096	0.0510479	0.025524	0.0102096	0.00510479
Rhomboid nucleus	0.029	0.102395	0.0511976	0.0255988	0.0102395	0.00511976
Central medial nucleus of the thalamus	0.029	0.102695	0.0513473	0.0256737	0.0102695	0.00513473
Paracentral nucleus	0.029	0.102994	0.051497	0.0257485	0.0102994	0.0051497
Central lateral nucleus of the thalamus	0.029	0.103293	0.0516467	0.0258234	0.0103293	0.00516467
Parafascicular nucleus	0.029	0.103593	0.0517964	0.0258982	0.0103593	0.00517964
Reticular nucleus of the thalamus	0.029	0.103892	0.0519461	0.0259731	0.0103892	0.00519461
Geniculate group, ventral thalamus	0.029	0.104192	0.0520958	0.0260479	0.0104192	0.00520958
Intergeniculate leaflet of the lateral geniculate complex	0.029	0.104491	0.0522455	0.0261228	0.0104491	0.00522455
Ventral part of the lateral geniculate complex	0.029	0.10479	0.0523952	0.0261976	0.010479	0.00523952
Epithalamus	0.029	0.10509	0.0525449	0.0262725	0.010509	0.00525449
Lateral habenula	0.029	0.105389	0.0526946	0.0263473	0.0105389	0.00526946
superior cerebellar peduncle decussation	0.029	0.105689	0.0528443	0.0264222	0.0105689	0.00528443
amygdalar capsule	0.029	0.105988	0.052994	0.026497	0.0105988	0.0052994
Lateral visual area, layer 2/3	0.057	0.106287	0.0531437	0.0265719	0.0106287	0.00531437
Lateral visual area, layer 6b	0.057	0.106587	0.0532934	0.0266467	0.0106587	0.00532934
Posterolateral visual area	0.057	0.106886	0.0534431	0.0267216	0.0106886	0.00534431
Posterolateral visual area, layer 2/3	0.057	0.107186	0.0535928	0.0267964	0.0107186	0.00535928
Posterolateral visual area, layer 6a	0.057	0.107485	0.0537425	0.0268713	0.0107485	0.00537425
posteromedial visual area, layer 6a	0.057	0.107784	0.0538922	0.0269461	0.0107784	0.00538922
Anterior cingulate area, ventral part, layer 5	0.057	0.108084	0.0540419	0.027021	0.0108084	0.00540419
Agranular insular area, dorsal part, layer 6b	0.057	0.108383	0.0541916	0.0270958	0.0108383	0.00541916
Retrosplenial area, lateral agranular part, layer 6b	0.057	0.108683	0.0543413	0.0271707	0.0108683	0.00543413
Perirhinal area, layer 6b	0.057	0.108982	0.054491	0.0272455	0.0108982	0.0054491
Ectorhinal area/Layer 6a	0.057	0.109281	0.0546407	0.0273204	0.0109281	0.00546407
Fasciola cinerea	0.057	0.109581	0.0547904	0.0273952	0.0109581	0.00547904
Entorhinal area, lateral part, layer 2	0.057	0.10988	0.0549401	0.0274701	0.010988	0.00549401
Entorhinal area, lateral part, layer 2b	0.057	0.11018	0.0550898	0.0275449	0.011018	0.00550898
Entorhinal area, medial part, dorsal zone	0.057	0.110479	0.0552395	0.0276198	0.0110479	0.00552395
Entorhinal area, medial part, dorsal zone, layer 2	0.057	0.110778	0.0553892	0.0276946	0.0110778	0.00553892
Entorhinal area, medial part, dorsal zone, layer 3	0.057	0.111078	0.0555389	0.0277695	0.0111078	0.00555389
Entorhinal area, medial part, dorsal zone, layer 6	0.057	0.111377	0.0556886	0.0278443	0.0111377	0.00556886
Parasubiculum	0.057	0.111677	0.0558383	0.0279192	0.0111677	0.00558383
Presubiculum	0.057	0.111976	0.055988	0.027994	0.0111976	0.0055988
Presubiculum, layer 1	0.057	0.112275	0.0561377	0.0280689	0.0112275	0.00561377
Presubiculum, layer 2	0.057	0.112575	0.0562874	0.0281437	0.0112575	0.00562874
Subiculum, ventral part, stratum radiatum	0.057	0.112874	0.0564371	0.0282186	0.0112874	0.00564371
Basolateral amygdalar nucleus, ventral part	0.057	0.113174	0.0565868	0.0282934	0.0113174	0.00565868
Basomedial amygdalar nucleus, posterior part	0.057	0.113473	0.0567365	0.0283683	0.0113473	0.00567365
Olfactory tubercle	0.057	0.113772	0.0568862	0.0284431	0.0113772	0.00568862
Major island of Calleja	0.057	0.114072	0.0570359	0.028518	0.0114072	0.00570359
Olfactory tubercle, molecular layer	0.057	0.114371	0.0571856	0.0285928	0.0114371	0.00571856
Olfactory tubercle, polymorph layer	0.057	0.114671	0.0573353	0.0286677	0.0114671	0.00573353
Subparafascicular area	0.057	0.11497	0.057485	0.0287425	0.011497	0.0057485
Medial geniculate complex	0.057	0.115269	0.0576347	0.0288174	0.0115269	0.00576347
Medial geniculate complex, ventral part	0.057	0.115569	0.0577844	0.0288922	0.0115569	0.00577844
Posterior limiting nucleus of the thalamus	0.057	0.115868	0.0579341	0.0289671	0.0115868	0.00579341
Suprageniculate nucleus	0.057	0.116168	0.0580838	0.0290419	0.0116168	0.00580838
Anterodorsal nucleus	0.057	0.116467	0.0582335	0.0291168	0.0116467	0.00582335
Mediodorsal nucleus of the thalamus, central part	0.057	0.116766	0.0583832	0.0291916	0.0116766	0.00583832
Mediodorsal nucleus of the thalamus, medial part	0.057	0.117066	0.0585329	0.0292665	0.0117066	0.00585329
vagus nerve	0.057	0.117365	0.0586826	0.0293413	0.0117365	0.00586826
solitary tract	0.057	0.117665	0.0588323	0.0294162	0.0117665	0.00588323
tectospinal pathway	0.057	0.117964	0.058982	0.029491	0.0117964	0.0058982
Posterior auditory area, layer 1	0.114	0.118263	0.0591317	0.0295659	0.0118263	0.00591317
Posterior auditory area, layer 4	0.114	0.118563	0.0592814	0.0296407	0.0118563	0.00592814
Posterior auditory area, layer 6a	0.114	0.118862	0.0594311	0.0297156	0.0118862	0.00594311
Parasubiculum, layer 2	0.114	0.119162	0.0595808	0.0297904	0.0119162	0.00595808
Olfactory tubercle, pyramidal layer	0.114	0.119461	0.0597305	0.0298653	0.0119461	0.00597305
Septohippocampal nucleus	0.114	0.11976	0.0598802	0.0299401	0.011976	0.00598802
Medial amygdalar nucleus, posterodorsal part, sublayer b	0.114	0.12006	0.0600299	0.030015	0.012006	0.00600299
Subparafascicular nucleus, magnocellular part	0.114	0.120359	0.0601796	0.0300898	0.0120359	0.00601796
Interanteromedial nucleus of the thalamus	0.114	0.120659	0.0603293	0.0301647	0.0120659	0.00603293
Intermediodorsal nucleus of the thalamus	0.114	0.120958	0.060479	0.0302395	0.0120958	0.0060479
Medial habenula	0.114	0.121257	0.0606287	0.0303144	0.0121257	0.00606287
superior colliculus commissure	0.114	0.121557	0.0607784	0.0303892	0.0121557	0.00607784
posterior commissure	0.114	0.121856	0.0609281	0.0304641	0.0121856	0.00609281
external capsule	0.114	0.122156	0.0610778	0.0305389	0.0122156	0.00610778
doral tegmental decussation	0.114	0.122455	0.0612275	0.0306138	0.0122455	0.00612275
Posterolateral visual area, layer 4	0.2	0.122754	0.0613772	0.0306886	0.0122754	0.00613772
Agranular insular area, ventral part, layer 6b	0.2	0.123054	0.0615269	0.0307635	0.0123054	0.00615269
Entorhinal area, medial part, dorsal zone, layer 2a	0.2	0.123353	0.0616766	0.0308383	0.0123353	0.00616766
Entorhinal area, medial part, ventral zone, layer 2	0.2	0.123653	0.0618263	0.0309132	0.0123653	0.00618263
Entorhinal area, medial part, ventral zone, layer 3	0.2	0.123952	0.061976	0.030988	0.0123952	0.0061976
Entorhinal area, medial part, ventral zone, layer 5/6	0.2	0.124251	0.0621257	0.0310629	0.0124251	0.00621257
Posterior amygdalar nucleus	0.2	0.124551	0.0622754	0.0311377	0.0124551	0.00622754
Islands of Calleja	0.2	0.12485	0.0624251	0.0312126	0.012485	0.00624251
Medial amygdalar nucleus, posteroventral part	0.2	0.12515	0.0625749	0.0312874	0.012515	0.00625749
fiber tracts	0.2	0.125449	0.0627246	0.0313623	0.0125449	0.00627246
optic nerve	0.2	0.125749	0.0628743	0.0314371	0.0125749	0.00628743
brachium of the superior colliculus	0.2	0.126048	0.063024	0.031512	0.0126048	0.0063024
optic chiasm	0.2	0.126347	0.0631737	0.0315868	0.0126347	0.00631737
optic tract	0.2	0.126647	0.0633234	0.0316617	0.0126647	0.00633234
oculomotor nerve	0.2	0.126946	0.0634731	0.0317365	0.0126946	0.00634731
medial longitudinal fascicle	0.2	0.127246	0.0636228	0.0318114	0.0127246	0.00636228
trigeminal nerve	0.2	0.127545	0.0637725	0.0318862	0.0127545	0.00637725
motor root of the trigeminal nerve	0.2	0.127844	0.0639222	0.0319611	0.0127844	0.00639222
facial nerve	0.2	0.128144	0.0640719	0.0320359	0.0128144	0.00640719
vestibulocochlear nerve	0.2	0.128443	0.0642216	0.0321108	0.0128443	0.00642216
cochlear nerve	0.2	0.128743	0.0643713	0.0321856	0.0128743	0.00643713
lateral lemniscus	0.2	0.129042	0.064521	0.0322605	0.0129042	0.0064521
cerebellum related fiber tracts	0.2	0.129341	0.0646707	0.0323353	0.0129341	0.00646707
arbor vitae	0.2	0.129641	0.0648204	0.0324102	0.0129641	0.00648204
anterior commissure, temporal limb	0.2	0.12994	0.0649701	0.032485	0.012994	0.00649701
mammillary related	0.2	0.13024	0.0651198	0.0325599	0.013024	0.00651198
mammilothalmic tract	0.2	0.130539	0.0652695	0.0326347	0.0130539	0.00652695
Field CA3, stratum lacunosum-moleculare	0.343	0.130838	0.0654192	0.0327096	0.0130838	0.00654192
Parasubiculum, layer 1	0.343	0.131138	0.0655689	0.0327844	0.0131138	0.00655689
Peripeduncular nucleus	0.343	0.131437	0.0657186	0.0328593	0.0131437	0.00657186
cranial nerves	0.343	0.131737	0.0658683	0.0329341	0.0131737	0.00658683
sensory root of the trigeminal nerve	0.343	0.132036	0.066018	0.033009	0.0132036	0.0066018
midbrain tract of the trigeminal nerve	0.343	0.132335	0.0661677	0.0330838	0.0132335	0.00661677
spinal tract of the trigeminal nerve	0.343	0.132635	0.0663174	0.0331587	0.0132635	0.00663174
genu of the facial nerve	0.343	0.132934	0.0664671	0.0332335	0.0132934	0.00664671
vestibular nerve	0.343	0.133234	0.0666168	0.0333084	0.0133234	0.00666168
brachium of the inferior colliculus	0.343	0.133533	0.0667665	0.0333832	0.0133533	0.00667665
cerebellar commissure	0.343	0.133832	0.0669162	0.0334581	0.0133832	0.00669162
superior cerebelar peduncles	0.343	0.134132	0.0670659	0.0335329	0.0134132	0.00670659
inferior cerebellar peduncle	0.343	0.134431	0.0672156	0.0336078	0.0134431	0.00672156
lateral forebrain bundle system	0.343	0.134731	0.0673653	0.0336826	0.0134731	0.00673653
corpus callosum, anterior forceps	0.343	0.13503	0.067515	0.0337575	0.013503	0.0067515
corticospinal tract	0.343	0.135329	0.0676647	0.0338323	0.0135329	0.00676647
cerebal peduncle	0.343	0.135629	0.0678144	0.0339072	0.0135629	0.00678144
rubrospinal tract	0.343	0.135928	0.0679641	0.033982	0.0135928	0.00679641
mammillotegmental tract	0.343	0.136228	0.0681138	0.0340569	0.0136228	0.00681138
mammillary peduncle	0.343	0.136527	0.0682635	0.0341317	0.0136527	0.00682635
habenular commissure	0.343	0.136826	0.0684132	0.0342066	0.0136826	0.00684132
Entorhinal area, medial part, dorsal zone, layer 2b	0.486	0.137126	0.0685629	0.0342814	0.0137126	0.00685629
Entorhinal area, medial part, ventral zone, layer 1	0.486	0.137425	0.0687126	0.0343563	0.0137425	0.00687126
vomeronasal nerve	0.486	0.137725	0.0688623	0.0344311	0.0137725	0.00688623
olfactory nerve layer of main olfactory bulb	0.486	0.138024	0.069012	0.034506	0.0138024	0.0069012
lateral olfactory tract, general	0.486	0.138323	0.0691617	0.0345808	0.0138323	0.00691617
lateral olfactory tract, body	0.486	0.138623	0.0693114	0.0346557	0.0138623	0.00693114
trapezoid body	0.486	0.138922	0.0694611	0.0347305	0.0138922	0.00694611
inferior colliculus commissure	0.486	0.139222	0.0696108	0.0348054	0.0139222	0.00696108
cerebellar peduncles	0.486	0.139521	0.0697605	0.0348802	0.0139521	0.00697605
pyramid	0.486	0.13982	0.0699102	0.0349551	0.013982	0.00699102
extrapyramidal fiber systems	0.486	0.14012	0.0700599	0.0350299	0.014012	0.00700599
ventral tegmental decussation	0.486	0.140419	0.0702096	0.0351048	0.0140419	0.00702096
hypothalamus related	0.486	0.140719	0.0703593	0.0351796	0.0140719	0.00703593
epithalamus related	0.486	0.141018	0.070509	0.0352545	0.0141018	0.0070509
posteromedial visual area, layer 1	0.686	0.141317	0.0706587	0.0353293	0.0141317	0.00706587
Induseum griseum	0.686	0.141617	0.0708084	0.0354042	0.0141617	0.00708084
Entorhinal area, medial part, ventral zone	0.686	0.141916	0.0709581	0.035479	0.0141916	0.00709581
dorsal limb	0.686	0.142216	0.0711078	0.0355539	0.0142216	0.00711078
middle cerebellar peduncle	0.686	0.142515	0.0712575	0.0356287	0.0142515	0.00712575
corpus callosum	0.686	0.142814	0.0714072	0.0357036	0.0142814	0.00714072
corpus callosum, posterior forceps	0.686	0.143114	0.0715569	0.0357784	0.0143114	0.00715569
corpus callosum, splenium	0.686	0.143413	0.0717066	0.0358533	0.0143413	0.00717066
thalamus related	0.686	0.143713	0.0718563	0.0359281	0.0143713	0.00718563
external medullary lamina of the thalamus	0.686	0.144012	0.072006	0.036003	0.0144012	0.0072006
cerebrum related	0.686	0.144311	0.0721557	0.0360778	0.0144311	0.00721557
cingulum bundle	0.686	0.144611	0.0723054	0.0361527	0.0144611	0.00723054
fornix system	0.686	0.14491	0.0724551	0.0362275	0.014491	0.00724551
alveus	0.686	0.14521	0.0726048	0.0363024	0.014521	0.00726048
dorsal fornix	0.686	0.145509	0.0727545	0.0363772	0.0145509	0.00727545
hippocampal commissures	0.686	0.145808	0.0729042	0.0364521	0.0145808	0.00729042
dorsal hippocampal commissure	0.686	0.146108	0.0730539	0.0365269	0.0146108	0.00730539
supramammillary decussation	0.686	0.146407	0.0732036	0.0366018	0.0146407	0.00732036
fasciculus retroflexus	0.686	0.146707	0.0733533	0.0366766	0.0146707	0.00733533
Somatomotor areas, Layer 1	1	0.147006	0.073503	0.0367515	0.0147006	0.0073503
Somatomotor areas, Layer 2/3	1	0.147305	0.0736527	0.0368263	0.0147305	0.00736527
Somatomotor areas, Layer 5	1	0.147605	0.0738024	0.0369012	0.0147605	0.00738024
Somatomotor areas, Layer 6a	1	0.147904	0.0739521	0.036976	0.0147904	0.00739521
Somatomotor areas, Layer 6b	1	0.148204	0.0741018	0.0370509	0.0148204	0.00741018
Somatosensory areas, layer 1	1	0.148503	0.0742515	0.0371257	0.0148503	0.00742515
Somatosensory areas, layer 2/3	1	0.148802	0.0744012	0.0372006	0.0148802	0.00744012
Somatosensory areas, layer 4	1	0.149102	0.0745509	0.0372754	0.0149102	0.00745509
Somatosensory areas, layer 5	1	0.149401	0.0747006	0.0373503	0.0149401	0.00747006
Somatosensory areas, layer 6a	1	0.149701	0.0748503	0.0374251	0.0149701	0.00748503
Somatosensory areas, layer 6b	1	0.15	0.075	0.0375	0.015	0.0075
Primary somatosensory area, layer 1	1	0.150299	0.0751497	0.0375749	0.0150299	0.00751497
Primary somatosensory area, layer 2/3	1	0.150599	0.0752994	0.0376497	0.0150599	0.00752994
Primary somatosensory area, layer 4	1	0.150898	0.0754491	0.0377246	0.0150898	0.00754491
Primary somatosensory area, layer 5	1	0.151198	0.0755988	0.0377994	0.0151198	0.00755988
Primary somatosensory area, layer 6a	1	0.151497	0.0757485	0.0378743	0.0151497	0.00757485
Primary somatosensory area, layer 6b	1	0.151796	0.0758982	0.0379491	0.0151796	0.00758982
Posterior auditory area, layer 6b	1	0.152096	0.0760479	0.038024	0.0152096	0.00760479
Visual areas, layer 1	1	0.152395	0.0761976	0.0380988	0.0152395	0.00761976
Visual areas, layer 2/3	1	0.152695	0.0763473	0.0381737	0.0152695	0.00763473
Visual areas, layer 4	1	0.152994	0.076497	0.0382485	0.0152994	0.0076497
Visual areas, layer 5	1	0.153293	0.0766467	0.0383234	0.0153293	0.00766467
Visual areas, layer 6a	1	0.153593	0.0767964	0.0383982	0.0153593	0.00767964
Visual areas, layer 6b	1	0.153892	0.0769461	0.0384731	0.0153892	0.00769461
Anterior cingulate area, layer 1	1	0.154192	0.0770958	0.0385479	0.0154192	0.00770958
Anterior cingulate area, layer 2/3	1	0.154491	0.0772455	0.0386228	0.0154491	0.00772455
Anterior cingulate area, layer 5	1	0.15479	0.0773952	0.0386976	0.015479	0.00773952
Anterior cingulate area, layer 6a	1	0.15509	0.0775449	0.0387725	0.015509	0.00775449
Anterior cingulate area, layer 6b	1	0.155389	0.0776946	0.0388473	0.0155389	0.00776946
Agranular insular area, posterior part, layer 6b	1	0.155689	0.0778443	0.0389222	0.0155689	0.00778443
Retrosplenial area, dorsal part, layer 4	1	0.155988	0.077994	0.038997	0.0155988	0.0077994
Dentate gyrus, subgranular zone	1	0.156287	0.0781437	0.0390719	0.0156287	0.00781437
Dentate gyrus crest	1	0.156587	0.0782934	0.0391467	0.0156587	0.00782934
Dentate gyrus crest, molecular layer	1	0.156886	0.0784431	0.0392216	0.0156886	0.00784431
Dentate gyrus crest, polymorph layer	1	0.157186	0.0785928	0.0392964	0.0157186	0.00785928
Dentate gyrus crest, granule cell layer	1	0.157485	0.0787425	0.0393713	0.0157485	0.00787425
Dentate gyrus lateral blade	1	0.157784	0.0788922	0.0394461	0.0157784	0.00788922
Dentate gyrus lateral blade, molecular layer	1	0.158084	0.0790419	0.039521	0.0158084	0.00790419
Dentate gyrus lateral blade, polymorph layer	1	0.158383	0.0791916	0.0395958	0.0158383	0.00791916
Dentate gyrus lateral blade, granule cell layer	1	0.158683	0.0793413	0.0396707	0.0158683	0.00793413
Dentate gyrus medial blade	1	0.158982	0.079491	0.0397455	0.0158982	0.0079491
Dentate gyrus medial blade, molecular layer	1	0.159281	0.0796407	0.0398204	0.0159281	0.00796407
Dentate gyrus medial blade, polymorph layer	1	0.159581	0.0797904	0.0398952	0.0159581	0.00797904
Dentate gyrus medial blade, granule cell layer	1	0.15988	0.0799401	0.0399701	0.015988	0.00799401
Entorhinal area, lateral part, layer 5/6	1	0.16018	0.0800898	0.0400449	0.016018	0.00800898
Entorhinal area, medial part, dorsal zone, layer 5/6	1	0.160479	0.0802395	0.0401198	0.0160479	0.00802395
Entorhinal area, medial part, ventral zone, layer 4	1	0.160778	0.0803892	0.0401946	0.0160778	0.00803892
Layer 6b, isocortex	1	0.161078	0.0805389	0.0402695	0.0161078	0.00805389
Olfactory tubercle, layers 1-3	1	0.161377	0.0806886	0.0403443	0.0161377	0.00806886
Ventral part of the lateral geniculate complex, lateral zone	1	0.161677	0.0808383	0.0404192	0.0161677	0.00808383
Ventral part of the lateral geniculate complex, medial zone	1	0.161976	0.080988	0.040494	0.0161976	0.0080988
Subgeniculate nucleus	1	0.162275	0.0811377	0.0405689	0.0162275	0.00811377
Pineal body	1	0.162575	0.0812874	0.0406437	0.0162575	0.00812874
terminal nerve	1	0.162874	0.0814371	0.0407186	0.0162874	0.00814371
olfactory nerve	1	0.163174	0.0815868	0.0407934	0.0163174	0.00815868
accessory olfactory tract	1	0.163473	0.0817365	0.0408683	0.0163473	0.00817365
anterior commissure, olfactory limb	1	0.163772	0.0818862	0.0409431	0.0163772	0.00818862
accessory optic tract	1	0.164072	0.0820359	0.041018	0.0164072	0.00820359
tectothalamic pathway	1	0.164371	0.0821856	0.0410928	0.0164371	0.00821856
trochlear nerve	1	0.164671	0.0823353	0.0411677	0.0164671	0.00823353
trochlear nerve decussation	1	0.16497	0.082485	0.0412425	0.016497	0.0082485
abducens nerve	1	0.165269	0.0826347	0.0413174	0.0165269	0.00826347
intermediate nerve	1	0.165569	0.0827844	0.0413922	0.0165569	0.00827844
efferent cochleovestibular bundle	1	0.165868	0.0829341	0.0414671	0.0165868	0.00829341
intermediate acoustic stria	1	0.166168	0.0830838	0.0415419	0.0166168	0.00830838
dorsal acoustic stria	1	0.166467	0.0832335	0.0416168	0.0166467	0.00832335
glossopharyngeal nerve	1	0.166766	0.0833832	0.0416916	0.0166766	0.00833832
accessory spinal nerve	1	0.167066	0.0835329	0.0417665	0.0167066	0.00835329
hypoglossal nerve	1	0.167365	0.0836826	0.0418413	0.0167365	0.00836826
ventral roots	1	0.167665	0.0838323	0.0419162	0.0167665	0.00838323
dorsal roots	1	0.167964	0.083982	0.041991	0.0167964	0.0083982
cervicothalamic tract	1	0.168263	0.0841317	0.0420659	0.0168263	0.00841317
dorsolateral fascicle	1	0.168563	0.0842814	0.0421407	0.0168563	0.00842814
dorsal commissure of the spinal cord	1	0.168862	0.0844311	0.0422156	0.0168862	0.00844311
ventral commissure of the spinal cord	1	0.169162	0.0845808	0.0422904	0.0169162	0.00845808
fasciculus proprius	1	0.169461	0.0847305	0.0423653	0.0169461	0.00847305
dorsal column	1	0.16976	0.0848802	0.0424401	0.016976	0.00848802
cuneate fascicle	1	0.17006	0.0850299	0.042515	0.017006	0.00850299
gracile fascicle	1	0.170359	0.0851796	0.0425898	0.0170359	0.00851796
internal arcuate fibers	1	0.170659	0.0853293	0.0426647	0.0170659	0.00853293
medial lemniscus	1	0.170958	0.085479	0.0427395	0.0170958	0.0085479
spinothalamic tract	1	0.171257	0.0856287	0.0428144	0.0171257	0.00856287
lateral spinothalamic tract	1	0.171557	0.0857784	0.0428892	0.0171557	0.00857784
ventral spinothalamic tract	1	0.171856	0.0859281	0.0429641	0.0171856	0.00859281
spinocervical tract	1	0.172156	0.0860778	0.0430389	0.0172156	0.00860778
spino-olivary pathway	1	0.172455	0.0862275	0.0431138	0.0172455	0.00862275
spinoreticular pathway	1	0.172754	0.0863772	0.0431886	0.0172754	0.00863772
spinovestibular pathway	1	0.173054	0.0865269	0.0432635	0.0173054	0.00865269
spinotectal pathway	1	0.173353	0.0866766	0.0433383	0.0173353	0.00866766
spinohypothalamic pathway	1	0.173653	0.0868263	0.0434132	0.0173653	0.00868263
spinotelenchephalic pathway	1	0.173952	0.086976	0.043488	0.0173952	0.0086976
hypothalamohypophysial tract	1	0.174251	0.0871257	0.0435629	0.0174251	0.00871257
spinocerebellar tract	1	0.174551	0.0872754	0.0436377	0.0174551	0.00872754
uncinate fascicle	1	0.17485	0.0874251	0.0437126	0.017485	0.00874251
ventral spinocerebellar tract	1	0.17515	0.0875749	0.0437874	0.017515	0.00875749
dorsal spinocerebellar tract	1	0.175449	0.0877246	0.0438623	0.0175449	0.00877246
cuneocerebellar tract	1	0.175749	0.0878743	0.0439371	0.0175749	0.00878743
juxtarestiform body	1	0.176048	0.088024	0.044012	0.0176048	0.0088024
bulbocerebellar tract	1	0.176347	0.0881737	0.0440868	0.0176347	0.00881737
olivocerebellar tract	1	0.176647	0.0883234	0.0441617	0.0176647	0.00883234
reticulocerebellar tract	1	0.176946	0.0884731	0.0442365	0.0176946	0.00884731
trigeminocerebellar tract	1	0.177246	0.0886228	0.0443114	0.0177246	0.00886228
corpus callosum, extreme capsule	1	0.177545	0.0887725	0.0443862	0.0177545	0.00887725
genu of corpus callosum	1	0.177844	0.0889222	0.0444611	0.0177844	0.00889222
corpus callosum, rostrum	1	0.178144	0.0890719	0.0445359	0.0178144	0.00890719
internal capsule	1	0.178443	0.0892216	0.0446108	0.0178443	0.00892216
corticotectal tract	1	0.178743	0.0893713	0.0446856	0.0178743	0.00893713
corticorubral tract	1	0.179042	0.089521	0.0447605	0.0179042	0.0089521
corticopontine tract	1	0.179341	0.0896707	0.0448353	0.0179341	0.00896707
corticobulbar tract	1	0.179641	0.0898204	0.0449102	0.0179641	0.00898204
pyramidal decussation	1	0.17994	0.0899701	0.044985	0.017994	0.00899701
corticospinal tract, crossed	1	0.18024	0.0901198	0.0450599	0.018024	0.00901198
corticospinal tract, uncrossed	1	0.180539	0.0902695	0.0451347	0.0180539	0.00902695
internal medullary lamina of the thalamus	1	0.180838	0.0904192	0.0452096	0.0180838	0.00904192
middle thalamic commissure	1	0.181138	0.0905689	0.0452844	0.0181138	0.00905689
thalamic peduncles	1	0.181437	0.0907186	0.0453593	0.0181437	0.00907186
cerebral nuclei related	1	0.181737	0.0908683	0.0454341	0.0181737	0.00908683
pallidothalmic pathway	1	0.182036	0.091018	0.045509	0.0182036	0.0091018
nigrostriatal tract	1	0.182335	0.0911677	0.0455838	0.0182335	0.00911677
nigrothalamic fibers	1	0.182635	0.0913174	0.0456587	0.0182635	0.00913174
pallidotegmental fascicle	1	0.182934	0.0914671	0.0457335	0.0182934	0.00914671
striatonigral pathway	1	0.183234	0.0916168	0.0458084	0.0183234	0.00916168
subthalamic fascicle	1	0.183533	0.0917665	0.0458832	0.0183533	0.00917665
direct tectospinal pathway	1	0.183832	0.0919162	0.0459581	0.0183832	0.00919162
crossed tectospinal pathway	1	0.184132	0.0920659	0.0460329	0.0184132	0.00920659
rubroreticular tract	1	0.184431	0.0922156	0.0461078	0.0184431	0.00922156
central tegmental bundle	1	0.184731	0.0923653	0.0461826	0.0184731	0.00923653
retriculospinal tract	1	0.18503	0.092515	0.0462575	0.018503	0.0092515
retriculospinal tract, lateral part	1	0.185329	0.0926647	0.0463323	0.0185329	0.00926647
retriculospinal tract, medial part	1	0.185629	0.0928144	0.0464072	0.0185629	0.00928144
vestibulospinal pathway	1	0.185928	0.0929641	0.046482	0.0185928	0.00929641
medial forebrain bundle system	1	0.186228	0.0931138	0.0465569	0.0186228	0.00931138
ansa peduncularis	1	0.186527	0.0932635	0.0466317	0.0186527	0.00932635
fimbria	1	0.186826	0.0934132	0.0467066	0.0186826	0.00934132
precommissural fornix, general	1	0.187126	0.0935629	0.0467814	0.0187126	0.00935629
precommissural fornix diagonal band	1	0.187425	0.0937126	0.0468563	0.0187425	0.00937126
postcommissural fornix	1	0.187725	0.0938623	0.0469311	0.0187725	0.00938623
medial corticohypothalmic tract	1	0.188024	0.094012	0.047006	0.0188024	0.0094012
columns of the fornix	1	0.188323	0.0941617	0.0470808	0.0188323	0.00941617
ventral hippocampal commissure	1	0.188623	0.0943114	0.0471557	0.0188623	0.00943114
perforant path	1	0.188922	0.0944611	0.0472305	0.0188922	0.00944611
angular path	1	0.189222	0.0946108	0.0473054	0.0189222	0.00946108
longitudinal association bundle	1	0.189521	0.0947605	0.0473802	0.0189521	0.00947605
stria terminalis	1	0.18982	0.0949102	0.0474551	0.018982	0.00949102
medial forebrain bundle	1	0.19012	0.0950599	0.0475299	0.019012	0.00950599
ventrolateral hypothalamic tract	1	0.190419	0.0952096	0.0476048	0.0190419	0.00952096
preoptic commissure	1	0.190719	0.0953593	0.0476796	0.0190719	0.00953593
supraoptic commissures	1	0.191018	0.095509	0.0477545	0.0191018	0.0095509
supraoptic commissures, anterior	1	0.191317	0.0956587	0.0478293	0.0191317	0.00956587
supraoptic commissures, dorsal	1	0.191617	0.0958084	0.0479042	0.0191617	0.00958084
supraoptic commissures, ventral	1	0.191916	0.0959581	0.047979	0.0191916	0.00959581
premammillary commissure	1	0.192216	0.0961078	0.0480539	0.0192216	0.00961078
propriohypothalamic pathways	1	0.192515	0.0962575	0.0481287	0.0192515	0.00962575
propriohypothalamic pathways, dorsal	1	0.192814	0.0964072	0.0482036	0.0192814	0.00964072
propriohypothalamic pathways, lateral	1	0.193114	0.0965569	0.0482784	0.0193114	0.00965569
propriohypothalamic pathways, medial	1	0.193413	0.0967066	0.0483533	0.0193413	0.00967066
propriohypothalamic pathways, ventral	1	0.193713	0.0968563	0.0484281	0.0193713	0.00968563
periventricular bundle of the hypothalamus	1	0.194012	0.097006	0.048503	0.0194012	0.0097006
principal mammillary tract	1	0.194311	0.0971557	0.0485778	0.0194311	0.00971557
dorsal thalamus related	1	0.194611	0.0973054	0.0486527	0.0194611	0.00973054
periventricular bundle of the thalamus	1	0.19491	0.0974551	0.0487275	0.019491	0.00974551
stria medullaris	1	0.19521	0.0976048	0.0488024	0.019521	0.00976048
pineal stalk	1	0.195509	0.0977545	0.0488772	0.0195509	0.00977545
midbrain related	1	0.195808	0.0979042	0.0489521	0.0195808	0.00979042
dorsal longitudinal fascicle	1	0.196108	0.0980539	0.0490269	0.0196108	0.00980539
dorsal tegmental tract	1	0.196407	0.0982036	0.0491018	0.0196407	0.00982036
ventricular systems	1	0.196707	0.0983533	0.0491766	0.0196707	0.00983533
lateral ventricle	1	0.197006	0.098503	0.0492515	0.0197006	0.0098503
rhinocele	1	0.197305	0.0986527	0.0493263	0.0197305	0.00986527
subependymal zone	1	0.197605	0.0988024	0.0494012	0.0197605	0.00988024
choroid plexus	1	0.197904	0.0989521	0.049476	0.0197904	0.00989521
choroid fissure	1	0.198204	0.0991018	0.0495509	0.0198204	0.00991018
interventricular foramen	1	0.198503	0.0992515	0.0496257	0.0198503	0.00992515
third ventricle	1	0.198802	0.0994012	0.0497006	0.0198802	0.00994012
cerebral aqueduct	1	0.199102	0.0995509	0.0497754	0.0199102	0.00995509
fourth ventricle	1	0.199401	0.0997006	0.0498503	0.0199401	0.00997006
lateral recess	1	0.199701	0.0998503	0.0499251	0.0199701	0.00998503
central canal, spinal cord/medulla	1	0.2	0.1	0.05	0.02	0.01

## Sheet: 19 area to detail MW
No		label name (pipeline 1)	detailed area (pipeline 2)	WT 1	WT 2	WT 3	WT 4	Hemi 1	Hemi 2	Hemi 3	Hemi 4		M-W	M-W Q=0.2	M-W Q=0.1	M-W Q=0.05	M-W Q=0.02	M-W Q=0.01	M-W ranking		Welch	Welch Q=0.2	Welch Q=0.1	Welch Q=0.05	Welch Q=0.02	Welch Q=0.01
1	MO	Somatomotor areas'	Somatomotor areas	19.0149	21.0223	20.3875	19.4529	15.5837	14.4846	13.7413	15.8956		0.029	0.000299401	0.000149701	7.48503e-05	2.99401e-05	1.49701e-05	1
7			Primary motor area	10.2207	11.1642	10.9129	10.457	8.23934	7.70999	7.30307	8.3579		0.029	0.000598802	0.000299401	0.000149701	5.98802e-05	2.99401e-05	2
8			Primary motor area, Layer 1	1.47669	1.64123	1.64761	1.60663	1.24708	1.21137	1.09104	1.22241		0.029	0.000898204	0.000449102	0.000224551	8.98204e-05	4.49102e-05	3
9			Primary motor area, Layer 2/3	3.52398	3.86626	3.78335	3.71943	2.88747	2.72165	2.53371	2.9681		0.029	0.0011976	0.000598802	0.000299401	0.00011976	5.98802e-05	4
10			Primary motor area, Layer 5	3.19786	3.49166	3.42576	3.21455	2.56645	2.35003	2.29645	2.63821		0.029	0.00149701	0.000748503	0.000374251	0.000149701	7.48503e-05	5
11			Primary motor area, Layer 6a	1.77687	1.92781	1.83937	1.66268	1.36784	1.26282	1.23093	1.35847		0.029	0.00179641	0.000898204	0.000449102	0.000179641	8.98204e-05	6
12			Primary motor area, Layer 6b	0.245335	0.237256	0.216847	0.253724	0.170501	0.164124	0.150943	0.170718		0.029	0.00209581	0.0010479	0.000523952	0.000209581	0.00010479	7
13			Secondary motor area	8.79421	9.85804	9.47452	8.99586	7.34431	6.77457	6.43824	7.53769		0.029	0.00239521	0.0011976	0.000598802	0.000239521	0.00011976	8
14			Secondary motor area, layer 1	1.779	1.97458	1.87254	1.86121	1.46521	1.36444	1.23433	1.51892		0.029	0.00269461	0.00134731	0.000673653	0.000269461	0.000134731	9
15			Secondary motor area, layer 2/3	2.94444	3.28885	3.16894	3.04084	2.44484	2.23778	2.12425	2.47434		0.029	0.00299401	0.00149701	0.000748503	0.000299401	0.000149701	10
16			Secondary motor area, layer 5	2.74375	3.15151	3.04777	2.84445	2.35215	2.16975	2.11107	2.46878		0.029	0.00329341	0.00164671	0.000823353	0.000329341	0.000164671	11
17			Secondary motor area, layer 6a	1.23305	1.35806	1.30023	1.17107	1.00813	0.943073	0.910333	1.01703		0.029	0.00359281	0.00179641	0.000898204	0.000359281	0.000179641	12
18			Secondary motor area, layer 6b	0.0939671	0.0850381	0.0850381	0.0782993	0.0739831	0.0595267	0.0582511	0.0586174		0.029	0.00389222	0.00194611	0.000973054	0.000389222	0.000194611	13
19	SS	'Somatosensory areas'	Somatosensory areas	31.7077	33.6266	32.5666	32.344	24.9021	24.1798	21.2676	25.0288		0.029	0.00419162	0.00209581	0.0010479	0.000419162	0.000209581	14
26			Primary somatosensory area	26.6594	28.2195	27.3636	26.8729	20.8471	20.2867	17.8712	20.742		0.029	0.00449102	0.00224551	0.00112275	0.000449102	0.000224551	15
33			Primary somatosensory area, nose	1.23475	1.34063	1.30108	1.28958	1.00728	0.919263	0.874192	1.04099		0.029	0.00479042	0.00239521	0.0011976	0.000479042	0.000239521	16
34			Primary somatosensory area, nose, layer 1	0.137336	0.158596	0.14499	0.141623	0.110975	0.109699	0.0977938	0.118946		0.029	0.00508982	0.00254491	0.00127246	0.000508982	0.000254491	17
35			Primary somatosensory area, nose, layer 2/3	0.329523	0.378419	0.354184	0.362401	0.284027	0.258091	0.236406	0.26656		0.029	0.00538922	0.00269461	0.00134731	0.000538922	0.000269461	18
36			Primary somatosensory area, nose, layer 4	0.140313	0.154344	0.154769	0.156171	0.119479	0.1114	0.104172	0.131782		0.029	0.00568862	0.00284431	0.00142216	0.000568862	0.000284431	19
37			Primary somatosensory area, nose, layer 5	0.32357	0.343979	0.335475	0.33459	0.252138	0.232579	0.225776	0.278968		0.029	0.00598802	0.00299401	0.00149701	0.000598802	0.000299401	20
38			Primary somatosensory area, nose, layer 6a	0.251287	0.251713	0.254264	0.243883	0.196013	0.168801	0.172202	0.202808		0.029	0.00628743	0.00314371	0.00157186	0.000628743	0.000314371	21
39			Primary somatosensory area, nose, layer 6b	0.0527236	0.053574	0.0574007	0.0509159	0.044645	0.0386924	0.037842	0.0419307		0.029	0.00658683	0.00329341	0.00164671	0.000658683	0.000329341	22
40			Primary somatosensory area, barrel field	8.78188	9.24917	8.95664	9.06646	6.93698	6.79327	5.77791	6.81117		0.029	0.00688623	0.00344311	0.00172156	0.000688623	0.000344311	23
41			Primary somatosensory area, barrel field, layer 1	0.849955	0.936694	0.767469	0.893382	0.690084	0.686258	0.554874	0.667896		0.029	0.00718563	0.00359281	0.00179641	0.000718563	0.000359281	24
42			Primary somatosensory area, barrel field, layer 2/3	2.51415	2.65957	2.68593	2.65191	2.07493	2.0137	1.67865	1.98358		0.029	0.00748503	0.00374251	0.00187126	0.000748503	0.000374251	25
43			Primary somatosensory area, barrel field, layer 4	1.25686	1.34955	1.32107	1.30114	1.0009	0.964758	0.845704	0.990506		0.029	0.00778443	0.00389222	0.00194611	0.000778443	0.000389222	26
44			Primary somatosensory area, barrel field, layer 5	2.11405	2.26584	2.22332	2.16157	1.67568	1.63443	1.40653	1.68022		0.029	0.00808383	0.00404192	0.00202096	0.000808383	0.000404192	27
45			Primary somatosensory area, barrel field, layer 6a	1.71522	1.72585	1.65867	1.72986	1.27302	1.26707	1.09402	1.26605		0.029	0.00838323	0.00419162	0.00209581	0.000838323	0.000419162	28
46			Primary somatosensory area, barrel field, layer 6b	0.331648	0.311665	0.300184	0.3286	0.222375	0.227052	0.198139	0.222917		0.029	0.00868263	0.00434132	0.00217066	0.000868263	0.000434132	29
47			Primary somatosensory area, lower limb	2.81178	3.00865	2.90405	2.77855	2.20376	2.14636	1.90655	2.12863		0.029	0.00898204	0.00449102	0.00224551	0.000898204	0.000449102	30
48			Primary somatosensory area, lower limb, layer 1	0.305287	0.335475	0.314641	0.329884	0.250862	0.246186	0.223225	0.230191		0.029	0.00928144	0.00464072	0.00232036	0.000928144	0.000464072	31
49			Primary somatosensory area, lower limb, layer 2/3	0.734729	0.812114	0.796807	0.769729	0.604196	0.591015	0.528087	0.593876		0.029	0.00958084	0.00479042	0.00239521	0.000958084	0.000479042	32
50			Primary somatosensory area, lower limb, layer 4	0.274248	0.298909	0.28998	0.274689	0.220674	0.21132	0.198989	0.222917		0.029	0.00988024	0.00494012	0.00247006	0.000988024	0.000494012	33
51			Primary somatosensory area, lower limb, layer 5	0.798082	0.866538	0.848255	0.778714	0.628857	0.62418	0.544244	0.619975		0.029	0.0101796	0.00508982	0.00254491	0.00101796	0.000508982	34
52			Primary somatosensory area, lower limb, layer 6a	0.58081	0.578259	0.553173	0.522423	0.419238	0.394152	0.343979	0.384222		0.029	0.010479	0.00523952	0.00261976	0.0010479	0.000523952	35
53			Primary somatosensory area, lower limb, layer 6b	0.118628	0.117353	0.101195	0.103115	0.0799358	0.0795107	0.0680305	0.0774435		0.029	0.0107784	0.00538922	0.00269461	0.00107784	0.000538922	36
54			Primary somatosensory area, mouth	2.70974	2.78415	2.77607	2.6549	2.05835	1.91123	1.79643	2.19965		0.029	0.0110778	0.00553892	0.00276946	0.00110778	0.000553892	37
55			Primary somatosensory area, mouth, layer 1	0.316342	0.350782	0.321019	0.32261	0.247886	0.241508	0.216847	0.250301		0.029	0.0113772	0.00568862	0.00284431	0.00113772	0.000568862	38
56			Primary somatosensory area, mouth, layer 2/3	0.734729	0.789153	0.761941	0.746196	0.58081	0.535741	0.504701	0.615269		0.029	0.0116766	0.00583832	0.00291916	0.00116766	0.000583832	39
57			Primary somatosensory area, mouth, layer 4	0.293381	0.301035	0.303586	0.296938	0.222375	0.215572	0.194737	0.239604		0.029	0.011976	0.00598802	0.00299401	0.0011976	0.000598802	40
58			Primary somatosensory area, mouth, layer 5	0.779374	0.786602	0.785752	0.736355	0.580385	0.541268	0.507678	0.633667		0.029	0.0122754	0.00613772	0.00306886	0.00122754	0.000613772	41
59			Primary somatosensory area, mouth, layer 6a	0.492796	0.46856	0.511079	0.464233	0.359711	0.318893	0.318043	0.389357		0.029	0.0125749	0.00628743	0.00314371	0.00125749	0.000628743	42
60			Primary somatosensory area, mouth, layer 6b	0.0931167	0.0880144	0.0926915	0.088568	0.0671801	0.0582512	0.0544244	0.0714533		0.029	0.0128743	0.00643713	0.00321856	0.00128743	0.000643713	43
61			Primary somatosensory area, upper limb	4.81656	4.99811	4.88246	4.63592	3.62815	3.61965	3.19573	3.61631		0.029	0.0131737	0.00658683	0.00329341	0.00131737	0.000658683	44
62			Primary somatosensory area, upper limb, layer 1	0.508102	0.559551	0.495347	0.548523	0.40138	0.413286	0.352908	0.362829		0.029	0.0134731	0.00673653	0.00336826	0.00134731	0.000673653	45
63			Primary somatosensory area, upper limb, layer 2/3	1.37464	1.45968	1.42736	1.36232	1.0668	1.09572	0.942647	1.07865		0.029	0.0137725	0.00688623	0.00344311	0.00137725	0.000688623	46
64			Primary somatosensory area, upper limb, layer 4	0.557425	0.583786	0.555724	0.531408	0.42434	0.425616	0.368215	0.427437		0.029	0.0140719	0.00703593	0.00351796	0.00140719	0.000703593	47
65			Primary somatosensory area, upper limb, layer 5	1.34233	1.38995	1.39335	1.25407	1.01663	0.978789	0.896302	1.04271		0.029	0.0143713	0.00718563	0.00359281	0.00143713	0.000718563	48
66			Primary somatosensory area, upper limb, layer 6a	0.862286	0.852082	0.856334	0.781709	0.602495	0.597393	0.538291	0.600722		0.029	0.0146707	0.00733533	0.00366766	0.00146707	0.000733533	49
67			Primary somatosensory area, upper limb, layer 6b	0.171777	0.153069	0.154344	0.157882	0.116502	0.108849	0.0973686	0.103971		0.029	0.0149701	0.00748503	0.00374251	0.00149701	0.000748503	50
68			Primary somatosensory area, trunk	3.76591	4.15879	3.88326	3.87517	3.07158	3.02778	2.57538	2.90178		0.029	0.0152695	0.00763473	0.00381737	0.00152695	0.000763473	51
69			Primary somatosensory area, trunk, layer 1	0.408608	0.440922	0.389049	0.415457	0.3359	0.338877	0.275949	0.326033		0.029	0.0155689	0.00778443	0.00389222	0.00155689	0.000778443	52
70			Primary somatosensory area, trunk, layer 2/3	1.10252	1.25474	1.17438	1.22327	0.931167	0.907357	0.799358	0.880117		0.029	0.0158683	0.00793413	0.00396707	0.00158683	0.000793413	53
71			Primary somatosensory area, trunk, layer 4	0.435395	0.484292	0.458355	0.45696	0.358436	0.352483	0.314641	0.351277		0.029	0.0161677	0.00808383	0.00404192	0.00161677	0.000808383	54
72			Primary somatosensory area, trunk, layer 5	0.988993	1.09657	1.04214	0.955422	0.787878	0.778099	0.660321	0.748335		0.029	0.0164671	0.00823353	0.00411677	0.00164671	0.000823353	55
73			Primary somatosensory area, trunk, layer 6a	0.678179	0.713895	0.676053	0.669181	0.538716	0.532339	0.428167	0.485626		0.029	0.0167665	0.00838323	0.00419162	0.00167665	0.000838323	56
74			Primary somatosensory area, trunk, layer 6b	0.152218	0.168375	0.143289	0.154887	0.119479	0.118628	0.0969434	0.110389		0.029	0.0170659	0.00853293	0.00426647	0.00170659	0.000853293	57
75			Primary somatosensory area, unassigned	2.53881	2.67998	2.65999	2.57232	1.94099	1.86914	1.74498	2.04348		0.029	0.0173653	0.00868263	0.00434132	0.00173653	0.000868263	58
76			Primary somatosensory area, unassigned, layer 1	0.287003	0.304436	0.31294	0.30464	0.223225	0.226202	0.207918	0.22634		0.029	0.0176647	0.00883234	0.00441617	0.00176647	0.000883234	59
77			Primary somatosensory area, unassigned, layer 2/3	0.711343	0.760666	0.753012	0.737211	0.565078	0.542544	0.475788	0.562214		0.029	0.0179641	0.00898204	0.00449102	0.00179641	0.000898204	60
78			Primary somatosensory area, unassigned, layer 4	0.222375	0.244484	0.236831	0.221206	0.176879	0.170927	0.156895	0.189116		0.029	0.0182635	0.00913174	0.00456587	0.00182635	0.000913174	61
79			Primary somatosensory area, unassigned, layer 5	0.811263	0.857609	0.84868	0.802246	0.596117	0.571031	0.553173	0.673031		0.029	0.0185629	0.00928144	0.00464072	0.00185629	0.000928144	62
80			Primary somatosensory area, unassigned, layer 6a	0.447725	0.451127	0.447726	0.447119	0.333349	0.313791	0.309114	0.351277		0.029	0.0188623	0.00943114	0.00471557	0.00188623	0.000943114	63
81			Primary somatosensory area, unassigned, layer 6b	0.0591015	0.0616526	0.0608022	0.0599011	0.0463458	0.044645	0.0420939	0.0415028		0.029	0.0191617	0.00958084	0.00479042	0.00191617	0.000958084	64
82			Supplemental somatosensory area	5.04828	5.40715	5.20306	5.47111	4.05504	3.89305	3.39642	4.28677		0.029	0.0194611	0.00973054	0.00486527	0.00194611	0.000973054	65
83			Supplemental somatosensory area, layer 1	0.58081	0.644163	0.596117	0.599866	0.484292	0.437947	0.403506	0.488193		0.029	0.0197605	0.00988024	0.00494012	0.00197605	0.000988024	66
84			Supplemental somatosensory area, layer 2/3	1.23008	1.29683	1.2896	1.33922	1.02981	0.989844	0.82572	1.04271		0.029	0.0200599	0.0100299	0.00501497	0.00200599	0.00100299	67
85			Supplemental somatosensory area, layer 4	0.615676	0.683706	0.60292	0.646076	0.49237	0.481741	0.402655	0.53098		0.029	0.0203593	0.0101796	0.00508982	0.00203593	0.00101796	68
86			Supplemental somatosensory area, layer 5	1.23603	1.32447	1.28875	1.34949	0.988142	0.960931	0.841452	1.07094		0.029	0.0206587	0.0103293	0.00516467	0.00206587	0.00103293	69
87			Supplemental somatosensory area, layer 6a	1.11102	1.15482	1.1225	1.22284	0.845279	0.812115	0.730052	0.914774		0.029	0.0209581	0.010479	0.00523952	0.00209581	0.0010479	70
88			Supplemental somatosensory area, layer 6b	0.274673	0.303161	0.303161	0.313625	0.215146	0.210469	0.193037	0.239176		0.029	0.0212575	0.0106287	0.00531437	0.00212575	0.00106287	71
89	GU	'Gustatory areas'	Gustatory areas	1.9546	2.0154	2.00817	2.08327	1.55492	1.42141	1.31256	1.68407		0.029	0.0215569	0.0107784	0.00538922	0.00215569	0.00107784	72
90			Gustatory areas, layer 1	0.332074	0.354184	0.348656	0.353844	0.26872	0.235131	0.218123	0.268699		0.029	0.0218563	0.0109281	0.00546407	0.00218563	0.00109281	73
91			Gustatory areas, layer 2/3	0.473237	0.486418	0.485568	0.495467	0.372892	0.337176	0.312515	0.403476		0.029	0.0221557	0.0110778	0.00553892	0.00221557	0.00110778	74
92			Gustatory areas, layer 4	0.128407	0.133935	0.137337	0.142051	0.104172	0.0956679	0.0926915	0.116379		0.029	0.0224551	0.0112275	0.00561377	0.00224551	0.00112275	75
93			Gustatory areas, layer 5	0.520858	0.527236	0.531488	0.562214	0.414561	0.382247	0.343979	0.450541		0.029	0.0227545	0.0113772	0.00568862	0.00227545	0.00113772	76
94			Gustatory areas, layer 6a	0.420513	0.43582	0.432419	0.446691	0.337176	0.311665	0.290405	0.379944		0.029	0.0230539	0.0115269	0.00576347	0.00230539	0.00115269	77
95			Gustatory areas, layer 6b	0.0795106	0.0778098	0.0727076	0.0830058	0.0574007	0.0595267	0.0548496	0.0650354		0.029	0.0233533	0.0116766	0.00583832	0.00233533	0.00116766	78
96	VISC	'Visceral area'	Visceral area	1.55875	1.61402	1.55662	1.62161	1.25644	1.14036	1.03832	1.31183		0.029	0.0236527	0.0118263	0.00591317	0.00236527	0.00118263	79
97			Visceral area, layer 1	0.267445	0.283602	0.274248	0.272978	0.224926	0.194312	0.186659	0.22035		0.029	0.0239521	0.011976	0.00598802	0.00239521	0.0011976	80
98			Visceral area, layer 2/3	0.371616	0.384372	0.366939	0.375237	0.295933	0.280201	0.240658	0.312769		0.029	0.0242515	0.0121257	0.00606287	0.00242515	0.00121257	81
99			Visceral area, layer 4	0.15647	0.171777	0.161572	0.168579	0.12373	0.123731	0.104597	0.139912		0.029	0.0245509	0.0122754	0.00613772	0.00245509	0.00122754	82
100			Visceral area, layer 5	0.379695	0.385222	0.372892	0.393208	0.301035	0.269996	0.250437	0.319187		0.029	0.0248503	0.0124251	0.00621257	0.00248503	0.00124251	83
101			Visceral area, layer 6a	0.323995	0.32442	0.321444	0.34871	0.261492	0.228328	0.215572	0.265276		0.029	0.0251497	0.0125749	0.00628743	0.00251497	0.00125749	84
102			Visceral area, layer 6b	0.0595266	0.0646289	0.0595267	0.0628961	0.0493221	0.0437947	0.0403931	0.0543388		0.029	0.0254491	0.0127246	0.00636228	0.00254491	0.00127246	85
103	AUD	'Auditory areas'	Auditory areas	6.0883	6.48373	6.44801	6.67041	4.8089	4.77447	4.05164	5.23321		0.029	0.0257485	0.0128743	0.00643713	0.00257485	0.00128743	86
104			Dorsal auditory area	1.95077	2.10809	2.09917	2.10895	1.56257	1.54387	1.31171	1.64899		0.029	0.0260479	0.013024	0.00651198	0.00260479	0.0013024	87
105			Dorsal auditory area, layer 1	0.242358	0.257665	0.261067	0.253296	0.196438	0.20154	0.170076	0.193395		0.029	0.0263473	0.0131737	0.00658683	0.00263473	0.00131737	88
106			Dorsal auditory area, layer 2/3	0.551047	0.612274	0.595692	0.623399	0.458355	0.436246	0.366939	0.486054		0.029	0.0266467	0.0133234	0.00666168	0.00266467	0.00133234	89
107			Dorsal auditory area, layer 4	0.214721	0.252563	0.248736	0.243027	0.182832	0.174328	0.154344	0.199385		0.029	0.0269461	0.0134731	0.00673653	0.00269461	0.00134731	90
108			Dorsal auditory area, layer 5	0.529787	0.544669	0.577834	0.556224	0.420088	0.403931	0.346105	0.429148		0.029	0.0272455	0.0136228	0.00681138	0.00272455	0.00136228	91
109			Dorsal auditory area, layer 6a	0.308688	0.340152	0.308688	0.323466	0.229603	0.246186	0.206217	0.257146		0.029	0.0275449	0.0137725	0.00688623	0.00275449	0.00137725	92
110			Dorsal auditory area, layer 6b	0.104172	0.10077	0.107148	0.109533	0.0752587	0.0816367	0.0680305	0.0838614		0.029	0.0278443	0.0139222	0.00696108	0.00278443	0.00139222	93
111			Primary auditory area	2.06855	2.1774	2.1842	2.26554	1.62975	1.59787	1.36359	1.75767		0.029	0.0281437	0.0140719	0.00703593	0.00281437	0.00140719	94
112			Primary auditory area, layer 1	0.256815	0.265744	0.287004	0.278968	0.206643	0.21132	0.176454	0.215644		0.029	0.0284431	0.0142216	0.00711078	0.00284431	0.00142216	95
113			Primary auditory area, layer 2/3	0.566779	0.586763	0.597818	0.597727	0.470261	0.443474	0.379695	0.47279		0.029	0.0287425	0.0143713	0.00718563	0.00287425	0.00143713	96
114			Primary auditory area, layer 4	0.237681	0.266169	0.26787	0.26656	0.192186	0.186234	0.159021	0.210081		0.029	0.0290419	0.014521	0.00726048	0.00290419	0.0014521	97
115			Primary auditory area, layer 5	0.59144	0.639912	0.619077	0.634523	0.443048	0.455379	0.3899	0.514721		0.029	0.0293413	0.0146707	0.00733533	0.00293413	0.00146707	98
116			Primary auditory area, layer 6a	0.321019	0.331223	0.315491	0.387646	0.250437	0.229603	0.194312	0.269555		0.029	0.0296407	0.0148204	0.00741018	0.00296407	0.00148204	99
117			Primary auditory area, layer 6b	0.0948174	0.0875892	0.0969434	0.10012	0.0671801	0.0718573	0.0642038	0.0748763		0.029	0.0299401	0.0149701	0.00748503	0.00299401	0.00149701	100
118			Posterior auditory area	0.135636	0.149667	0.150517	0.151036	0.106298	0.107573	0.0897152	0.12023		0.029	0.0302395	0.0151198	0.00755988	0.00302395	0.00151198	101
120			Posterior auditory area, layer 2/3	0.0420938	0.0454954	0.042519	0.0427865	0.0327397	0.0314641	0.0250862	0.031662		0.029	0.0305389	0.0152695	0.00763473	0.00305389	0.00152695	102
122			Posterior auditory area, layer 5	0.0408183	0.0420938	0.0480465	0.0457815	0.0301885	0.0301886	0.0263618	0.0329456		0.029	0.0308383	0.0154192	0.00770958	0.00308383	0.00154192	103
125			Ventral auditory area	1.93334	2.04857	2.01413	2.14489	1.51028	1.52516	1.28663	1.70632		0.029	0.0311377	0.0155689	0.00778443	0.00311377	0.00155689	104
126			Ventral auditory area, layer 1	0.277224	0.281051	0.280201	0.288809	0.226201	0.215572	0.194737	0.246878		0.029	0.0314371	0.0157186	0.00785928	0.00314371	0.00157186	105
127			Ventral auditory area, layer 2/3	0.430293	0.471961	0.471536	0.503169	0.343979	0.368215	0.296783	0.38465		0.029	0.0317365	0.0158683	0.00793413	0.00317365	0.00158683	106
128			Ventral auditory area, layer 4	0.231304	0.227902	0.225776	0.251157	0.185383	0.158596	0.150943	0.202808		0.029	0.0320359	0.016018	0.00800898	0.00320359	0.0016018	107
129			Ventral auditory area, layer 5	0.55955	0.59229	0.595267	0.612275	0.425616	0.450702	0.376719	0.494611		0.029	0.0323353	0.0161677	0.00808383	0.00323353	0.00161677	108
130			Ventral auditory area, layer 6a	0.342703	0.375443	0.343979	0.389357	0.25724	0.268295	0.207493	0.295226		0.029	0.0326347	0.0163174	0.00815868	0.00326347	0.00163174	109
131			Ventral auditory area, layer 6b	0.0922663	0.0999197	0.0973686	0.10012	0.0718572	0.0637786	0.0599519	0.08215		0.029	0.0329341	0.0164671	0.00823353	0.00329341	0.00164671	110
132	VIS	'Visual areas'	Visual areas	8.50296	9.64247	9.91672	9.66932	7.32518	7.07475	6.36298	7.85559		0.029	0.0332335	0.0166168	0.00830838	0.00332335	0.00166168	111
139			Anterolateral visual area	1.41843	1.5732	1.61402	1.58396	1.16162	1.11102	0.95923	1.23097		0.029	0.0335329	0.0167665	0.00838323	0.00335329	0.00167665	112
140			Anterolateral visual area, layer 1	0.180706	0.201115	0.220249	0.203236	0.160722	0.152644	0.127982	0.15831		0.029	0.0338323	0.0169162	0.00845808	0.00338323	0.00169162	113
141			Anterolateral visual area, layer 2/3	0.384372	0.437521	0.448576	0.460383	0.331223	0.312515	0.26702	0.344859		0.029	0.0341317	0.0170659	0.00853293	0.00341317	0.00170659	114
142			Anterolateral visual area, layer 4	0.164549	0.187934	0.188359	0.184838	0.13436	0.125006	0.114376	0.141195		0.029	0.0344311	0.0172156	0.00860778	0.00344311	0.00172156	115
143			Anterolateral visual area, layer 5	0.414135	0.446025	0.459206	0.452253	0.327822	0.324846	0.26702	0.35855		0.029	0.0347305	0.0173653	0.00868263	0.00347305	0.00173653	116
144			Anterolateral visual area, layer 6a	0.206643	0.231304	0.227477	0.222062	0.161147	0.151793	0.142864	0.176708		0.029	0.0350299	0.017515	0.00875749	0.00350299	0.0017515	117
145			Anterolateral visual area, layer 6b	0.0680305	0.069306	0.0701564	0.0611847	0.0463458	0.0442199	0.0399679	0.0513437		0.029	0.0353293	0.0176647	0.00883234	0.00353293	0.00176647	118
146			Anteromedial visual area	1.28833	1.41248	1.48944	1.40896	1.11698	1.06425	0.920538	1.13983		0.029	0.0356287	0.0178144	0.00890719	0.00356287	0.00178144	119
147			Anteromedial visual area, layer 1	0.207918	0.233855	0.247036	0.225057	0.184533	0.182407	0.156895	0.1904		0.029	0.0359281	0.0179641	0.00898204	0.00359281	0.00179641	120
148			Anteromedial visual area, layer 2/3	0.3359	0.361412	0.405207	0.37267	0.283177	0.274248	0.242784	0.297794		0.029	0.0362275	0.0181138	0.00905689	0.00362275	0.00181138	121
149			Anteromedial visual area, layer 4	0.130533	0.149667	0.157746	0.15831	0.127557	0.114802	0.106298	0.124081		0.029	0.0365269	0.0182635	0.00913174	0.00365269	0.00182635	122
150			Anteromedial visual area, layer 5	0.344829	0.373742	0.384372	0.361118	0.291681	0.276799	0.243634	0.309346		0.029	0.0368263	0.0184132	0.00920659	0.00368263	0.00184132	123
151			Anteromedial visual area, layer 6a	0.201965	0.215572	0.221099	0.223773	0.172627	0.159872	0.130959	0.163016		0.029	0.0371257	0.0185629	0.00928144	0.00371257	0.00185629	124
152			Anteromedial visual area, layer 6b	0.0671801	0.078235	0.0739831	0.0680305	0.0574007	0.0561252	0.0399679	0.0551945		0.029	0.0374251	0.0187126	0.00935629	0.00374251	0.00187126	125
153			Lateral visual area	0.552322	0.655644	0.650967	0.679877	0.476213	0.483442	0.415836	0.544243		0.029	0.0377246	0.0188623	0.00943114	0.00377246	0.00188623	126
154			Lateral visual area, layer 1	0.0633534	0.0735579	0.0795106	0.079155	0.062503	0.0591015	0.053574	0.0616125		0.029	0.038024	0.019012	0.00950599	0.0038024	0.0019012	127
156			Lateral visual area, layer 4	0.0676053	0.0790854	0.0701564	0.0761599	0.0548496	0.0501725	0.0480465	0.0586174		0.029	0.0383234	0.0191617	0.00958084	0.00383234	0.00191617	128
157			Lateral visual area, layer 5	0.146265	0.173478	0.170501	0.187405	0.126282	0.139037	0.112675	0.145474		0.029	0.0386228	0.0193114	0.00965569	0.00386228	0.00193114	129
158			Lateral visual area, layer 6a	0.0858884	0.107148	0.106298	0.111673	0.0718572	0.0714321	0.0620778	0.0842893		0.029	0.0389222	0.0194611	0.00973054	0.00389222	0.00194611	130
160			Primary visual area	4.078	4.65073	4.73109	4.63078	3.53333	3.40833	3.0737	3.78189		0.029	0.0392216	0.0196108	0.00980539	0.00392216	0.00196108	131
161			Primary visual area, layer 1	0.560401	0.617376	0.622054	0.613986	0.472387	0.495347	0.449426	0.510014		0.029	0.039521	0.0197605	0.00988024	0.0039521	0.00197605	132
162			Primary visual area, layer 2/3	1.22455	1.36954	1.44437	1.39655	1.04129	1.04044	0.938396	1.12785		0.029	0.0398204	0.0199102	0.00995509	0.00398204	0.00199102	133
163			Primary visual area, layer 4	0.531913	0.616951	0.628006	0.614414	0.470261	0.443474	0.396703	0.502741		0.029	0.0401198	0.0200599	0.0100299	0.00401198	0.00200599	134
164			Primary visual area, layer 5	1.04809	1.23263	1.23305	1.19845	0.930742	0.866964	0.787878	0.992645		0.029	0.0404192	0.0202096	0.0101048	0.00404192	0.00202096	135
165			Primary visual area, layer 6a	0.578684	0.6701	0.656069	0.666185	0.506402	0.464308	0.414561	0.530552		0.029	0.0407186	0.0203593	0.0101796	0.00407186	0.00203593	136
166			Primary visual area, layer 6b	0.13436	0.14414	0.147541	0.141195	0.11225	0.0977939	0.0867389	0.118091		0.029	0.041018	0.020509	0.0102545	0.0041018	0.0020509	137
168			Posterolateral visual area, layer 1	0.0586763	0.0650541	0.0633534	0.0676026	0.0429442	0.0395428	0.0437946	0.0547666		0.029	0.0413174	0.0206587	0.0103293	0.00413174	0.00206587	138
171			Posterolateral visual area, layer 5	0.120329	0.154344	0.142014	0.133922	0.114801	0.103321	0.0956679	0.115096		0.029	0.0416168	0.0208084	0.0104042	0.00416168	0.00208084	139
173			Posterolateral visual area, layer 6b	0.0102046	0.00935419	0.00977938	0.0106966	0.00765343	0.00722825	0.00340152	0.00770156		0.029	0.0419162	0.0209581	0.010479	0.00419162	0.00209581	140
174			posteromedial visual area	0.758965	0.842302	0.941372	0.880546	0.661171	0.660747	0.666699	0.738494		0.029	0.0422156	0.0211078	0.0105539	0.00422156	0.00211078	141
176			posteromedial visual area, layer 2/3	0.262768	0.293381	0.320168	0.305923	0.223225	0.227052	0.230028	0.258858		0.029	0.042515	0.0212575	0.0106287	0.0042515	0.00212575	142
177			posteromedial visual area, layer 4	0.0807862	0.087164	0.091416	0.0937024	0.0654793	0.0629283	0.0603771	0.0727369		0.029	0.0428144	0.0214072	0.0107036	0.00428144	0.00214072	143
178			posteromedial visual area, layer 5	0.181556	0.195162	0.206217	0.201524	0.164123	0.143289	0.140313	0.173713		0.029	0.0431138	0.0215569	0.0107784	0.00431138	0.00215569	144
180			posteromedial visual area, layer 6b	0.0106298	0.0140313	0.0136061	0.0119802	0.00850381	0.00977939	0.00722824	0.00984088		0.029	0.0434132	0.0217066	0.0108533	0.00434132	0.00217066	145
181	ACA	'Anterior cingulate area'	Anterior cingulate area	4.33992	4.80125	4.53593	4.07156	3.59626	3.20339	3.03841	3.42505		0.029	0.0437126	0.0218563	0.0109281	0.00437126	0.00218563	146
187			Anterior cingulate area, dorsal part	2.38914	2.74333	2.623	2.38192	2.07876	1.86659	1.725	2.07086		0.029	0.044012	0.022006	0.011003	0.0044012	0.0022006	147
188			Anterior cingulate area, dorsal part, layer 1	0.642463	0.767469	0.704966	0.685867	0.623754	0.506828	0.486418	0.594304		0.029	0.0443114	0.0221557	0.0110778	0.00443114	0.00221557	148
189			Anterior cingulate area, dorsal part, layer 2/3	0.812964	0.918411	0.894601	0.751331	0.645864	0.639912	0.545094	0.712394		0.029	0.0446108	0.0223054	0.0111527	0.00446108	0.00223054	149
190			Anterior cingulate area, dorsal part, layer 5	0.582936	0.675202	0.69136	0.643081	0.543393	0.487694	0.460056	0.51686		0.029	0.0449102	0.0224551	0.0112275	0.00449102	0.00224551	150
191			Anterior cingulate area, dorsal part, layer 6a	0.314216	0.345255	0.299759	0.26656	0.236406	0.205367	0.213871	0.221206		0.029	0.0452096	0.0226048	0.0113024	0.00452096	0.00226048	151
192			Anterior cingulate area, dorsal part, layer 6b	0.0365664	0.0369916	0.0323145	0.0350849	0.0293381	0.026787	0.0195588	0.0260997		0.029	0.045509	0.0227545	0.0113772	0.0045509	0.00227545	152
193			Anterior cingulate area, ventral part	1.95077	2.05792	1.91293	1.68964	1.5175	1.3368	1.31341	1.35419		0.029	0.0458084	0.0229042	0.0114521	0.00458084	0.00229042	153
194			Anterior cingulate area, ventral part, layer 1	0.606321	0.667974	0.642463	0.581896	0.545519	0.450702	0.442623	0.488193		0.029	0.0461078	0.0230539	0.0115269	0.00461078	0.00230539	154
195			Anterior cingulate area, ventral part, layer 2/3	0.645439	0.694336	0.637786	0.543816	0.42519	0.450277	0.418813	0.430004		0.029	0.0464072	0.0232036	0.0116018	0.00464072	0.00232036	155
197			Anterior cingulate area, ventral part, 6a	0.200265	0.184533	0.181131	0.1643	0.147541	0.129683	0.115227	0.103971		0.029	0.0467066	0.0233533	0.0116766	0.00467066	0.00233533	156
198			Anterior cingulate area, ventral part, 6b	0.0416687	0.0361412	0.0344404	0.0342292	0.0250862	0.0293382	0.0272122	0.0273833		0.029	0.047006	0.023503	0.0117515	0.0047006	0.0023503	157
199	AI	'Agranular insular area'	Agranular insular area	4.078	4.37138	4.28677	4.54136	3.3403	3.17533	2.83985	3.73911		0.029	0.0473054	0.0236527	0.0118263	0.00473054	0.00236527	158
200			Agranular insular area, dorsal part	1.99117	2.21184	2.14849	2.24971	1.65867	1.56088	1.40908	1.86848		0.029	0.0476048	0.0238024	0.0119012	0.00476048	0.00238024	159
201			Agranular insular area, dorsal part, layer 1	0.395852	0.438371	0.428592	0.465089	0.336751	0.314216	0.26702	0.385506		0.029	0.0479042	0.0239521	0.011976	0.00479042	0.00239521	160
202			Agranular insular area, dorsal part, layer 2/3	0.860585	0.962631	0.943923	0.986656	0.727926	0.682857	0.626306	0.823211		0.029	0.0482036	0.0241018	0.0120509	0.00482036	0.00241018	161
203			Agranular insular area, dorsal part, layer 5	0.542118	0.610148	0.576984	0.590026	0.443474	0.419663	0.388199	0.485198		0.029	0.048503	0.0242515	0.0121257	0.0048503	0.00242515	162
204			Agranular insular area, dorsal part, layer 6a	0.183682	0.188785	0.187934	0.196818	0.142864	0.137337	0.121179	0.165584		0.029	0.0488024	0.0244012	0.0122006	0.00488024	0.00244012	163
206			Agranular insular area, posterior part	1.14164	1.16672	1.15312	1.22626	0.900128	0.883121	0.798083	0.988367		0.029	0.0491018	0.0245509	0.0122754	0.00491018	0.00245509	164
207			Agranular insular area, posterior part, layer 1	0.337176	0.341003	0.343979	0.351277	0.261917	0.269996	0.232154	0.293943		0.029	0.0494012	0.0247006	0.0123503	0.00494012	0.00247006	165
208			Agranular insular area, posterior part, layer 2/3	0.316342	0.333349	0.328672	0.356411	0.264043	0.241083	0.228327	0.290092		0.029	0.0497006	0.0248503	0.0124251	0.00497006	0.00248503	166
209			Agranular insular area, posterior part, layer 5	0.287003	0.294232	0.288279	0.309346	0.225776	0.225351	0.202816	0.247733		0.029	0.05	0.025	0.0125	0.005	0.0025	167
210			Agranular insular area, posterior part, layer 6a	0.201115	0.198139	0.192186	0.209226	0.148391	0.146691	0.134785	0.156598		0.029	0.0502994	0.0251497	0.0125749	0.00502994	0.00251497	168
212			Agranular insular area, ventral part	0.945198	0.99282	0.985166	1.06538	0.7815	0.731328	0.632684	0.882256		0.029	0.0505988	0.0252994	0.0126497	0.00505988	0.00252994	169
213			Agranular insular area, ventral part, layer 1	0.167525	0.170076	0.174328	0.177564	0.137762	0.125857	0.106723	0.158738		0.029	0.0508982	0.0254491	0.0127246	0.00508982	0.00254491	170
214			Agranular insular area, ventral part, layer 2/3	0.377569	0.396703	0.388199	0.442412	0.306562	0.288705	0.247036	0.351277		0.029	0.0511976	0.0255988	0.0127994	0.00511976	0.00255988	171
215			Agranular insular area, ventral part, layer 5	0.305712	0.32442	0.326546	0.339725	0.247886	0.239382	0.213446	0.293943		0.029	0.051497	0.0257485	0.0128743	0.0051497	0.00257485	172
216			Agranular insular area, ventral part, layer 6a	0.0935419	0.10077	0.0960931	0.105255	0.0888648	0.0773847	0.0654793	0.0778713		0.029	0.0517964	0.0258982	0.0129491	0.00517964	0.00258982	173
218	RSP	Retrosplenial area'	Retrosplenial area	5.40715	5.74177	6.01389	5.58577	4.55549	4.62693	4.26679	4.61109		0.029	0.0520958	0.0260479	0.013024	0.00520958	0.00260479	174
219			Retrosplenial area, lateral agranular part	0.639061	0.680305	0.75939	0.688007	0.5587	0.52256	0.520008	0.564353		0.029	0.0523952	0.0261976	0.0130988	0.00523952	0.00261976	175
220			Retrosplenial area, lateral agranular part, layer 1	0.111825	0.121179	0.130108	0.121514	0.0909907	0.0990695	0.0960931	0.0979809		0.029	0.0526946	0.0263473	0.0131737	0.00526946	0.00263473	176
221			Retrosplenial area, lateral agranular part, layer 2/3	0.190485	0.207493	0.241508	0.21436	0.172627	0.159447	0.163698	0.169862		0.029	0.052994	0.026497	0.0132485	0.0052994	0.0026497	177
222			Retrosplenial area, lateral agranular part, layer 5	0.183257	0.192611	0.210044	0.189116	0.158596	0.147116	0.143714	0.157882		0.029	0.0532934	0.0266467	0.0133234	0.00532934	0.00266467	178
223			Retrosplenial area, lateral agranular part, layer 6a	0.131384	0.139888	0.154769	0.142479	0.117353	0.102046	0.102896	0.121513		0.029	0.0535928	0.0267964	0.0133982	0.00535928	0.00267964	179
225			Retrosplenial area, dorsal part	1.92314	2.03624	2.26499	1.98743	1.61785	1.65399	1.58596	1.61091		0.029	0.0538922	0.0269461	0.0134731	0.00538922	0.00269461	180
226			Retrosplenial area, dorsal part, layer 1	0.328247	0.359286	0.468135	0.34272	0.286578	0.325271	0.325271	0.278968		0.029	0.0541916	0.0270958	0.0135479	0.00541916	0.00270958	181
227			Retrosplenial area, dorsal part, layer 2/3	0.55955	0.574007	0.654368	0.557508	0.466009	0.474088	0.464733	0.453536		0.029	0.054491	0.0272455	0.0136228	0.0054491	0.00272455	182
229			Retrosplenial area, dorsal part, layer 5	0.642463	0.689659	0.719848	0.673459	0.525961	0.551898	0.519583	0.565209		0.029	0.0547904	0.0273952	0.0136976	0.00547904	0.00273952	183
230			Retrosplenial area, dorsal part, layer 6a	0.358435	0.369916	0.381396	0.37481	0.309539	0.276799	0.253414	0.289236		0.029	0.0550898	0.0275449	0.0137725	0.00550898	0.00275449	184
231			Retrosplenial area, dorsal part, layer 6b	0.0344404	0.0433694	0.0412435	0.0389357	0.0297633	0.0259366	0.0229603	0.0239604		0.029	0.0553892	0.0276946	0.0138473	0.00553892	0.00276946	185
232			Retrosplenial area, ventral part	2.84495	3.02523	2.98951	2.91034	2.37894	2.45038	2.16082	2.43583		0.029	0.0556886	0.0278443	0.0139222	0.00556886	0.00278443	186
233			Retrosplenial area, ventral part, layer 1	0.584212	0.620353	0.619928	0.598583	0.508103	0.51193	0.447726	0.512582		0.029	0.055988	0.027994	0.013997	0.0055988	0.0027994	187
234			Retrosplenial area, ventral part, layer 2	0.275098	0.282326	0.292531	0.269127	0.215572	0.250863	0.205367	0.231902		0.029	0.0562874	0.0281437	0.0140719	0.00562874	0.00281437	188
235			Retrosplenial area, ventral part, layer 2/3	0.540417	0.557425	0.567629	0.533547	0.420088	0.454104	0.415836	0.463377		0.029	0.0565868	0.0282934	0.0141467	0.00565868	0.00282934	189
236			Retrosplenial area, ventral part, layer 5	0.929466	1.04257	0.977088	1.00762	0.807011	0.819343	0.730903	0.81936		0.029	0.0568862	0.0284431	0.0142216	0.00568862	0.00284431	190
237			Retrosplenial area, ventral part, layer 6a	0.46941	0.476638	0.485993	0.454392	0.3899	0.382672	0.330798	0.377376		0.029	0.0571856	0.0285928	0.0142964	0.00571856	0.00285928	191
238			Retrosplenial area, ventral part, layer 6b	0.0463457	0.0459206	0.0463458	0.0470651	0.0382671	0.0314641	0.0301885	0.0312341		0.029	0.057485	0.0287425	0.0143713	0.0057485	0.00287425	192
239	PTLp	'Posterior parietal association areas'	Posterior parietal association areas	2.63235	2.93381	2.82922	2.85172	2.24245	2.10852	1.78793	2.18553		0.029	0.0577844	0.0288922	0.0144461	0.00577844	0.00288922	193
240			Posterior parietal association areas, layer 1	0.398829	0.442198	0.446875	0.415457	0.337176	0.318893	0.273823	0.33459		0.029	0.0580838	0.0290419	0.014521	0.00580838	0.00290419	194
241			Posterior parietal association areas, layer 2/3	0.70284	0.781925	0.75854	0.782137	0.605896	0.585913	0.480891	0.611418		0.029	0.0583832	0.0291916	0.0145958	0.00583832	0.00291916	195
242			Posterior parietal association areas, layer 4	0.24491	0.26702	0.262768	0.267415	0.220674	0.204517	0.173903	0.217355		0.029	0.0586826	0.0293413	0.0146707	0.00586826	0.00293413	196
243			Posterior parietal association areas, layer 5	0.72665	0.834224	0.778524	0.808237	0.607597	0.576984	0.501725	0.588741		0.029	0.058982	0.029491	0.0147455	0.0058982	0.0029491	197
244			Posterior parietal association areas, layer 6a	0.424765	0.442623	0.433694	0.422303	0.350357	0.317618	0.271697	0.327316		0.029	0.0592814	0.0296407	0.0148204	0.00592814	0.00296407	198
245			Posterior parietal association areas, layer 6b	0.13436	0.165824	0.148817	0.156171	0.120754	0.104597	0.0858885	0.10611		0.029	0.0595808	0.0297904	0.0148952	0.00595808	0.00297904	199
246	TEa	'Temporal association areas'	Temporal association areas	2.77734	2.99504	3.00312	3.13625	2.16209	2.26499	1.95418	2.51541		0.029	0.0598802	0.0299401	0.0149701	0.00598802	0.00299401	200
247			Temporal association areas, layer 1	0.466859	0.514055	0.522984	0.507448	0.384372	0.384373	0.313365	0.410322		0.029	0.0601796	0.0300898	0.0150449	0.00601796	0.00300898	201
248			Temporal association areas, layer 2/3	0.698163	0.757264	0.741957	0.772296	0.540842	0.552323	0.511079	0.611418		0.029	0.060479	0.0302395	0.0151198	0.0060479	0.00302395	202
249			Temporal association areas, layer 4	0.235981	0.265744	0.24661	0.287525	0.195162	0.201966	0.169651	0.221206		0.029	0.0607784	0.0303892	0.0151946	0.00607784	0.00303892	203
250			Temporal association areas, layer 5	0.832097	0.879294	0.906931	0.966119	0.640337	0.699864	0.59144	0.794116		0.029	0.0610778	0.0305389	0.0152695	0.00610778	0.00305389	204
251			Temporal association areas, layer 6a	0.405632	0.435395	0.444749	0.460383	0.30231	0.318468	0.287004	0.359406		0.029	0.0613772	0.0306886	0.0153443	0.00613772	0.00306886	205
252			Temporal association areas, layer 6b	0.138612	0.143289	0.139888	0.142479	0.0990694	0.107998	0.0816366	0.118946		0.029	0.0616766	0.0308383	0.0154192	0.00616766	0.00308383	206
253	PERI	'Perirhinal area'	Perirhinal area	1.09784	1.14929	1.17735	1.2284	0.877593	0.917987	0.826996	1.00634		0.029	0.061976	0.030988	0.015494	0.0061976	0.0030988	207
254			Perirhinal area, layer 6a	0.131809	0.144565	0.136061	0.149325	0.100345	0.115227	0.0994946	0.128359		0.029	0.0622754	0.0311377	0.0155689	0.00622754	0.00311377	208
256			Perirhinal area, layer 1	0.248311	0.265744	0.287429	0.287525	0.211745	0.213021	0.188785	0.22634		0.029	0.0625749	0.0312874	0.0156437	0.00625749	0.00312874	209
257			Perirhinal area, layer 5	0.315491	0.325696	0.327397	0.346143	0.24576	0.253414	0.23343	0.276828		0.029	0.0628743	0.0314371	0.0157186	0.00628743	0.00314371	210
258			Perirhinal area, layer 2/3	0.352058	0.354184	0.36779	0.386362	0.278075	0.28998	0.266594	0.324321		0.029	0.0631737	0.0315868	0.0157934	0.00631737	0.00315868	211
259	ECT	'Ectorhinal area'	Ectorhinal area	2.43719	2.70719	2.69443	2.79053	1.99032	2.04262	1.76284	2.24372		0.029	0.0634731	0.0317365	0.0158683	0.00634731	0.00317365	212
260			Ectorhinal area/Layer 1	0.511079	0.569755	0.55785	0.554941	0.417112	0.41201	0.3899	0.436422		0.029	0.0637725	0.0318862	0.0159431	0.00637725	0.00318862	213
261			Ectorhinal area/Layer 2/3	0.790854	0.889923	0.890774	0.909213	0.650541	0.687959	0.549346	0.717529		0.029	0.0640719	0.0320359	0.016018	0.00640719	0.00320359	214
262			Ectorhinal area/Layer 5	0.750036	0.79213	0.796382	0.851879	0.589314	0.601645	0.534465	0.700842		0.029	0.0643713	0.0321856	0.0160928	0.00643713	0.00321856	215
264			Ectorhinal area/Layer 6b	0.0888648	0.10077	0.101195	0.103115	0.0710068	0.0744084	0.0599519	0.0868565		0.029	0.0646707	0.0323353	0.0161677	0.00646707	0.00323353	216
265	HPF	'Hippocampal formation'	Hippocampal formation	29.4444	31.8876	31.6682	34.3088	23.7226	25.6152	23.2745	27.2062		0.029	0.0649701	0.032485	0.0162425	0.00649701	0.0032485	217
266			Hippocampal region	14.8485	16.1419	15.789	16.5455	11.5643	13.0942	11.7659	12.96		0.029	0.0652695	0.0326347	0.0163174	0.00652695	0.00326347	218
267			Ammon's horn	10.3908	11.2552	11.0686	11.1887	7.96807	9.1331	8.11774	8.78791		0.029	0.0655689	0.0327844	0.0163922	0.00655689	0.00327844	219
268			Field CA1	6.04663	6.5879	6.51775	6.51253	4.48278	5.39057	4.74045	5.12282		0.029	0.0658683	0.0329341	0.0164671	0.00658683	0.00329341	220
269			Field CA1, stratum lacunosum-moleculare	1.58341	1.75093	1.76582	1.72087	1.14844	1.50347	1.31384	1.39056		0.029	0.0661677	0.0330838	0.0165419	0.00661677	0.00330838	221
270			Field CA1, stratum oriens	1.20839	1.29045	1.25304	1.25536	0.93882	0.995797	0.866964	0.973819		0.029	0.0664671	0.0332335	0.0166168	0.00664671	0.00332335	222
271			Field CA1, pyramidal layer	1.34658	1.45117	1.44267	1.4342	0.997497	1.13654	1.04469	1.14539		0.029	0.0667665	0.0333832	0.0166916	0.00667665	0.00333832	223
272			Field CA1, stratum radiatum	1.90825	2.09534	2.05622	2.1021	1.39803	1.75476	1.51495	1.61305		0.029	0.0670659	0.0335329	0.0167665	0.00670659	0.00335329	224
273			Field CA2	0.436245	0.474087	0.468135	0.441129	0.311665	0.385648	0.33505	0.339724		0.029	0.0673653	0.0336826	0.0168413	0.00673653	0.00336826	225
274			Field CA2, stratum lacunosum-moleculare	0.110975	0.122455	0.119479	0.097981	0.0807862	0.0948176	0.0854633	0.0864286		0.029	0.0676647	0.0338323	0.0169162	0.00676647	0.00338323	226
275			Field CA2, stratum oriens	0.118203	0.124156	0.127132	0.119374	0.0863137	0.101621	0.0799358	0.0860007		0.029	0.0679641	0.033982	0.016991	0.00679641	0.0033982	227
276			Field CA2, pyramidal layer	0.0756839	0.0833373	0.080361	0.08215	0.0556999	0.0684557	0.0595267	0.0603289		0.029	0.0682635	0.0341317	0.0170659	0.00682635	0.00341317	228
277			Field CA2, stratum radiatum	0.131384	0.14414	0.141163	0.141623	0.0888648	0.120754	0.110124	0.106966		0.029	0.0685629	0.0342814	0.0171407	0.00685629	0.00342814	229
278			Field CA3	3.90792	4.19323	4.08268	4.23501	3.17362	3.35688	3.04224	3.32536		0.029	0.0688623	0.0344311	0.0172156	0.00688623	0.00344311	230
280			Field CA3, stratum lucidum	0.248736	0.270421	0.273823	0.275545	0.209194	0.225776	0.196013	0.222062		0.029	0.0691617	0.0345808	0.0172904	0.00691617	0.00345808	231
281			Field CA3, stratum oriens	1.35891	1.41503	1.36401	1.38757	1.11357	1.11017	1.00983	1.08592		0.029	0.0694611	0.0347305	0.0173653	0.00694611	0.00347305	232
282			Field CA3, pyramidal layer	1.12165	1.25856	1.17395	1.25578	0.926065	0.972412	0.891625	1.0012		0.029	0.0697605	0.0348802	0.0174401	0.00697605	0.00348802	233
283			Field CA3, stratum radiatum	1.12378	1.19734	1.21519	1.2652	0.888223	0.989844	0.899703	0.970396		0.029	0.0700599	0.0350299	0.017515	0.00700599	0.00350299	234
284			Dentate gyrus	4.39179	4.80678	4.64521	5.28584	3.53503	3.90623	3.58181	4.12033		0.029	0.0703593	0.0351796	0.0175898	0.00703593	0.00351796	235
285			Dentate gyrus, molecular layer	2.86791	3.12472	3.05499	3.44602	2.28497	2.54307	2.33302	2.69212		0.029	0.0706587	0.0353293	0.0176647	0.00706587	0.00353293	236
286			Dentate gyrus, polymorph layer	0.538716	0.564228	0.573157	0.637091	0.431993	0.463883	0.440072	0.488621		0.029	0.0709581	0.035479	0.0177395	0.00709581	0.0035479	237
287			Dentate gyrus, granule cell layer	0.985166	1.11783	1.01706	1.20273	0.818066	0.899279	0.808712	0.93959		0.029	0.0712575	0.0356287	0.0178144	0.00712575	0.00356287	238
303			Retrohippocampal region	14.5959	15.7457	15.8792	17.7632	12.1583	12.521	11.5086	14.2462		0.029	0.0715569	0.0357784	0.0178892	0.00715569	0.00357784	239
304			Entorhinal area	8.62073	9.17476	9.38906	10.5298	7.50801	7.42808	6.91572	8.36432		0.029	0.0718563	0.0359281	0.0179641	0.00718563	0.00359281	240
305			Entorhinal area, lateral part	6.1542	6.53007	6.78349	7.33018	5.44329	5.36676	5.05254	5.87672		0.029	0.0721557	0.0360778	0.0180389	0.00721557	0.00360778	241
306			Entorhinal area, lateral part, layer 1	1.24793	1.30278	1.37592	1.50951	1.17055	1.10124	1.02684	1.213		0.029	0.0724551	0.0362275	0.0181138	0.00724551	0.00362275	242
308			Entorhinal area, lateral part, layer 2/3	0.136911	0.137336	0.149667	0.141195	0.113951	0.105873	0.100345	0.117663		0.029	0.0727545	0.0363772	0.0181886	0.00727545	0.00363772	243
309			Entorhinal area, lateral part, layer 2a	0.676053	0.701139	0.738131	0.83562	0.616526	0.587189	0.563377	0.637518		0.029	0.0730539	0.0365269	0.0182635	0.00730539	0.00365269	244
311			Entorhinal area, lateral part, layer 3	0.921387	1.01918	1.05107	1.10945	0.846979	0.837201	0.779374	0.899371		0.029	0.0733533	0.0366766	0.0183383	0.00733533	0.00366766	245
312			Entorhinal area, lateral part, layer 4	0.392025	0.413285	0.433694	0.45482	0.341003	0.33335	0.329948	0.361545		0.029	0.0736527	0.0368263	0.0184132	0.00736527	0.00368263	246
313			Entorhinal area, lateral part, layer 4/5	0.160722	0.158596	0.15562	0.163444	0.117778	0.12288	0.12288	0.143762		0.029	0.0739521	0.036976	0.018488	0.00739521	0.0036976	247
314			Entorhinal area, lateral part, layer 5	0.945198	0.94945	0.977513	1.07308	0.760666	0.75769	0.732178	0.860863		0.029	0.0742515	0.0371257	0.0185629	0.00742515	0.00371257	248
316			Entorhinal area, lateral part, layer 6a	0.850806	0.917986	0.961781	1.00848	0.707092	0.749186	0.683281	0.815082		0.029	0.0745509	0.0372754	0.0186377	0.00745509	0.00372754	249
317			Entorhinal area, lateral part, layer 6b	0.126282	0.128833	0.140313	0.147185	0.0965182	0.119479	0.107998	0.116807		0.029	0.0748503	0.0374251	0.0187126	0.00748503	0.00374251	250
319			Entorhinal area, medial part, dorsal zone, layer 1	0.625455	0.674777	0.655219	0.849739	0.536165	0.525961	0.46941	0.612274		0.029	0.0751497	0.0375749	0.0187874	0.00751497	0.00375749	251
324			Entorhinal area, medial part, dorsal zone, layer 4	0.0722824	0.0773847	0.0820618	0.0838615	0.0561251	0.0548496	0.0531488	0.0714533		0.029	0.0754491	0.0377246	0.0188623	0.00754491	0.00377246	252
325			Entorhinal area, medial part, dorsal zone, layer 5	0.145415	0.160722	0.162848	0.201524	0.115227	0.12288	0.107148	0.143762		0.029	0.0757485	0.0378743	0.0189371	0.00757485	0.00378743	253
337			Parasubiculum, layer 3	0.213871	0.248311	0.232154	0.261853	0.165824	0.181557	0.159872	0.212649		0.029	0.0760479	0.038024	0.019012	0.00760479	0.0038024	254
338			Postsubiculum	0.565928	0.65777	0.624605	0.62511	0.466434	0.430718	0.405207	0.543816		0.029	0.0763473	0.0381737	0.0190868	0.00763473	0.00381737	255
339			Postsubiculum, layer 1	0.150517	0.178155	0.169226	0.155315	0.122455	0.123305	0.110124	0.147613		0.029	0.0766467	0.0383234	0.0191617	0.00766467	0.00383234	256
340			Postsubiculum, layer 2	0.214296	0.255965	0.242359	0.245167	0.17858	0.170076	0.159021	0.207086		0.029	0.0769461	0.0384731	0.0192365	0.00769461	0.00384731	257
341			Postsubiculum, layer 3	0.201115	0.22365	0.21302	0.224629	0.165399	0.137337	0.136061	0.189116		0.029	0.0772455	0.0386228	0.0193114	0.00772455	0.00386228	258
345			Presubiculum, layer 3	0.246185	0.272122	0.261067	0.284102	0.183257	0.207493	0.170501	0.238748		0.029	0.0775449	0.0387725	0.0193862	0.00775449	0.00387725	259
346			Subiculum	3.78972	4.04271	4.04824	4.42412	2.87896	3.21317	2.92106	3.58807		0.029	0.0778443	0.0389222	0.0194611	0.00778443	0.00389222	260
347			Subiculum, dorsal part	0.957954	1.01578	0.967308	0.994358	0.690084	0.809989	0.689234	0.768872		0.029	0.0781437	0.0390719	0.0195359	0.00781437	0.00390719	261
348			Subiculum, dorsal part, molecular layer	0.166675	0.186233	0.17773	0.168151	0.109274	0.162848	0.121604	0.140767		0.029	0.0784431	0.0392216	0.0196108	0.00784431	0.00392216	262
349			Subiculum, dorsal part, pyramidal layer	0.609298	0.631833	0.605471	0.629389	0.448576	0.50215	0.429017	0.471934		0.029	0.0787425	0.0393713	0.0196856	0.00787425	0.00393713	263
350			Subiculum, dorsal part, stratum radiatum	0.181981	0.197714	0.184107	0.196818	0.132234	0.14499	0.138612	0.15617		0.029	0.0790419	0.039521	0.0197605	0.00790419	0.0039521	264
351			Subiculum, ventral part	2.83177	3.02693	3.08093	3.42976	2.18888	2.40318	2.23183	2.8192		0.029	0.0793413	0.0396707	0.0198353	0.00793413	0.00396707	265
352			Subiculum, ventral part, molecular layer	0.568054	0.581235	0.594416	0.674315	0.429017	0.476639	0.443474	0.566492		0.029	0.0796407	0.0398204	0.0199102	0.00796407	0.00398204	266
353			Subiculum, ventral part, pyramidal layer	1.90528	2.0592	2.09109	2.30919	1.46733	1.59277	1.48689	1.88004		0.029	0.0799401	0.0399701	0.019985	0.00799401	0.00399701	267
355	CTXsp	Cortical subplate'	Cortical subplate	5.77451	6.01602	5.89059	6.60709	4.66221	4.63671	4.23065	5.29653		0.029	0.0802395	0.0401198	0.0200599	0.00802395	0.00401198	268
357			Claustrum	0.86101	0.891199	0.878444	0.93189	0.682005	0.654794	0.596542	0.73935		0.029	0.0805389	0.0402695	0.0201347	0.00805389	0.00402695	269
358			Endopiriform nucleus	2.13105	2.24586	2.20079	2.41059	1.74923	1.72755	1.55662	1.92282		0.029	0.0808383	0.0404192	0.0202096	0.00808383	0.00404192	270
359			Endopiriform nucleus, dorsal part	1.71352	1.81004	1.76879	1.91298	1.41333	1.38612	1.25006	1.5416		0.029	0.0811377	0.0405689	0.0202844	0.00811377	0.00405689	271
360			Endopiriform nucleus, ventral part	0.417537	0.43582	0.431994	0.497607	0.3359	0.341428	0.306562	0.381227		0.029	0.0814371	0.0407186	0.0203593	0.00814371	0.00407186	272
361			Lateral amygdalar nucleus	0.504276	0.530212	0.549771	0.590453	0.408183	0.392026	0.386498	0.447546		0.029	0.0817365	0.0408683	0.0204341	0.00817365	0.00408683	273
362			Basolateral amygdalar nucleus	1.16587	1.20712	1.17183	1.37772	0.930317	0.940522	0.907357	1.08549		0.029	0.0820359	0.041018	0.020509	0.00820359	0.0041018	274
363			Basolateral amygdalar nucleus, anterior part	0.628857	0.642463	0.611849	0.717101	0.528512	0.485143	0.469836	0.56692		0.029	0.0823353	0.0411677	0.0205838	0.00823353	0.00411677	275
364			Basolateral amygdalar nucleus, posterior part	0.348231	0.366514	0.37927	0.424442	0.252988	0.281902	0.286153	0.334162		0.029	0.0826347	0.0413174	0.0206587	0.00826347	0.00413174	276
366			Basomedial amygdalar nucleus	0.858884	0.889923	0.866963	0.971681	0.688808	0.71347	0.582936	0.842465		0.029	0.0829341	0.0414671	0.0207335	0.00829341	0.00414671	277
367			Basomedial amygdalar nucleus, anterior part	0.266169	0.262768	0.251288	0.277684	0.212595	0.207068	0.14414	0.242599		0.029	0.0832335	0.0416168	0.0208084	0.00832335	0.00416168	278
370	STR	'Striatum'	Striatum	33.0228	33.6402	33.1402	36.3107	25.8218	25.062	21.8093	28.3268		0.029	0.0835329	0.0417665	0.0208832	0.00835329	0.00417665	279
371			Striatum dorsal region	19.9134	20.2348	19.91	20.8742	15.3115	14.8349	13.5636	16.3363		0.029	0.0838323	0.0419162	0.0209581	0.00838323	0.00419162	280
372			Caudoputamen	19.9134	20.2348	19.91	20.8742	15.3115	14.8349	13.5636	16.3363		0.029	0.0841317	0.0420659	0.0210329	0.00841317	0.00420659	281
373			Striatum ventral region	7.35537	7.5484	7.47102	9.25343	5.89144	6.00667	4.40157	7.12351		0.029	0.0844311	0.0422156	0.0211078	0.00844311	0.00422156	282
374			Nucleus accumbens	3.85988	4.19323	4.08098	4.89007	3.25526	3.18638	2.65914	3.81912		0.029	0.0847305	0.0423653	0.0211826	0.00847305	0.00423653	283
375			Fundus of striatum	0.314216	0.321019	0.30231	0.338441	0.264468	0.240658	0.187509	0.269982		0.029	0.0850299	0.042515	0.0212575	0.00850299	0.0042515	284
383			Lateral septal complex	2.87641	2.93084	2.8441	2.92446	2.30156	2.00392	2.02476	2.18895		0.029	0.0853293	0.0426647	0.0213323	0.00853293	0.00426647	285
384			Lateral septal nucleus	2.58813	2.64171	2.55157	2.63394	2.05367	1.80961	1.80621	1.97459		0.029	0.0856287	0.0428144	0.0214072	0.00856287	0.00428144	286
385			Lateral septal nucleus, caudal (caudodorsal) part	0.559976	0.521709	0.520433	0.468512	0.454103	0.323145	0.36779	0.324321		0.029	0.0859281	0.0429641	0.021482	0.00859281	0.00429641	287
386			Lateral septal nucleus, rostral (rostroventral) part	1.94355	2.02688	1.93802	2.07172	1.53664	1.42737	1.37507	1.57711		0.029	0.0862275	0.0431138	0.0215569	0.00862275	0.00431138	288
387			Lateral septal nucleus, ventral part	0.0846129	0.0931167	0.0931167	0.0937024	0.0629282	0.0591015	0.0633534	0.0731648		0.029	0.0865269	0.0432635	0.0216317	0.00865269	0.00432635	289
388			Septofimbrial nucleus	0.221099	0.216847	0.224926	0.217783	0.179005	0.14584	0.16625	0.151892		0.029	0.0868263	0.0434132	0.0217066	0.00868263	0.00434132	290
390			Striatum-like amygdalar nuclei	3.13025	3.17575	3.16172	3.54657	2.52861	2.40828	1.99925	2.90734		0.029	0.0871257	0.0435629	0.0217814	0.00871257	0.00435629	291
391			Anterior amygdalar area	0.481741	0.503425	0.477064	0.545528	0.397128	0.398829	0.207493	0.438989		0.029	0.0874251	0.0437126	0.0218563	0.00874251	0.00437126	292
392			Bed nucleus of the accessory olfactory tract	0.0544244	0.0493221	0.0578259	0.0671748	0.0433694	0.0425191	0.0195588	0.0470651		0.029	0.0877246	0.0438623	0.0219311	0.00877246	0.00438623	293
393			Central amygdalar nucleus	0.958804	0.979639	0.99367	1.09961	0.805736	0.741533	0.71347	0.880545		0.029	0.088024	0.044012	0.022006	0.0088024	0.0044012	294
394			Central amygdalar nucleus, capsular part	0.381396	0.388624	0.394577	0.420591	0.305287	0.28998	0.268295	0.341008		0.029	0.0883234	0.0441617	0.0220808	0.00883234	0.00441617	295
395			Central amygdalar nucleus, lateral part	0.161998	0.161572	0.164124	0.189544	0.141163	0.118203	0.12373	0.151464		0.029	0.0886228	0.0443114	0.0221557	0.00886228	0.00443114	296
396			Central amygdalar nucleus, medial part	0.415411	0.429442	0.43497	0.489477	0.359286	0.33335	0.321444	0.388073		0.029	0.0889222	0.0444611	0.0222305	0.00889222	0.00444611	297
397			Intercalated amygdalar nucleus	0.165824	0.165399	0.164549	0.166867	0.125856	0.126707	0.102046	0.149325		0.029	0.0892216	0.0446108	0.0223054	0.00892216	0.00446108	298
398			Medial amygdalar nucleus	1.21689	1.22838	1.222	1.37944	0.945198	0.906932	0.776823	1.16208		0.029	0.089521	0.0447605	0.0223802	0.0089521	0.00447605	299
399			Medial amygdalar nucleus, anterodorsal part	0.54807	0.550196	0.561677	0.604573	0.424765	0.403931	0.383522	0.528412		0.029	0.0898204	0.0449102	0.0224551	0.00898204	0.00449102	300
400			Medial amygdalar nucleus, anteroventral part	0.326971	0.320594	0.332499	0.369247	0.233004	0.241508	0.136911	0.311913		0.029	0.0901198	0.0450599	0.0225299	0.00901198	0.00450599	301
401			Medial amygdalar nucleus, posterodorsal part	0.287429	0.30146	0.26787	0.337157	0.242359	0.219824	0.216847	0.260997		0.029	0.0904192	0.0452096	0.0226048	0.00904192	0.00452096	302
402			Medial amygdalar nucleus, posterodorsal part, sublayer a	0.115652	0.121179	0.108424	0.13435	0.0935419	0.0837626	0.0837625	0.106538		0.029	0.0907186	0.0453593	0.0226796	0.00907186	0.00453593	303
404			Medial amygdalar nucleus, posterodorsal part, sublayer c	0.0999197	0.107148	0.0960931	0.11424	0.0820617	0.0850382	0.0756839	0.0860007		0.029	0.091018	0.045509	0.0227545	0.0091018	0.0045509	304
406	TH	'Thalamus'	Thalamus	14.4148	15.9608	15.1946	16.3615	12.1804	12.2344	11.0681	12.379		0.029	0.0913174	0.0456587	0.0228293	0.00913174	0.00456587	305
407			Thalamus, sensory-motor cortex related	4.4088	4.90159	4.76256	5.19556	3.6256	3.69278	3.56607	4.06214		0.029	0.0916168	0.0458084	0.0229042	0.00916168	0.00458084	306
408			Ventral group of the dorsal thalamus	2.99759	3.29267	3.22677	3.49523	2.38319	2.46058	2.4053	2.68784		0.029	0.0919162	0.0459581	0.022979	0.00919162	0.00459581	307
409			Ventral anterior-lateral complex of the thalamus	0.838901	0.95923	0.914585	0.999492	0.665848	0.693486	0.661171	0.734643		0.029	0.0922156	0.0461078	0.0230539	0.00922156	0.00461078	308
410			Ventral medial nucleus of the thalamus	0.519157	0.579534	0.560401	0.609707	0.410309	0.443049	0.409458	0.465944		0.029	0.092515	0.0462575	0.0231287	0.0092515	0.00462575	309
411			Ventral posterior complex of the thalamus	1.63953	1.75391	1.75178	1.88603	1.30704	1.32404	1.33467	1.48726		0.029	0.0928144	0.0464072	0.0232036	0.00928144	0.00464072	310
412			Ventral posterolateral nucleus of the thalamus	0.604621	0.633108	0.642038	0.685012	0.477914	0.483442	0.511504	0.552373		0.029	0.0931138	0.0465569	0.0232784	0.00931138	0.00465569	311
413			Ventral posterolateral nucleus of the thalamus, parvicellular part	0.0569755	0.060377	0.0629282	0.0744485	0.0429442	0.0450702	0.0454954	0.0436422		0.029	0.0934132	0.0467066	0.0233533	0.00934132	0.00467066	312
414			Ventral posteromedial nucleus of the thalamus	0.855058	0.926065	0.930742	0.980666	0.692635	0.697738	0.687108	0.78941		0.029	0.0937126	0.0468563	0.0234281	0.00937126	0.00468563	313
415			Ventral posteromedial nucleus of the thalamus, parvicellular part	0.12288	0.13436	0.116077	0.145902	0.0935419	0.0977939	0.0905656	0.101832		0.029	0.094012	0.047006	0.023503	0.0094012	0.0047006	314
416			Subparafascicular nucleus	0.260216	0.282752	0.264894	0.296938	0.206643	0.208769	0.205792	0.245594		0.029	0.0943114	0.0471557	0.0235778	0.00943114	0.00471557	315
418			Subparafascicular nucleus, parvicellular part	0.205792	0.207068	0.201115	0.229336	0.149667	0.161998	0.157321	0.181842		0.029	0.0946108	0.0473054	0.0236527	0.00946108	0.00473054	316
421			Geniculate group, dorsal thalamus	1.02939	1.17608	1.12165	1.24038	0.909907	0.896302	0.842302	0.992645		0.029	0.0949102	0.0474551	0.0237275	0.00949102	0.00474551	317
423			Medial geniculate complex, dorsal part	0.151368	0.184958	0.170927	0.180559	0.125006	0.122455	0.119904	0.142479		0.029	0.0952096	0.0476048	0.0238024	0.00952096	0.00476048	318
425			Medial geniculate complex, medial part	0.121179	0.125431	0.13351	0.13435	0.105022	0.0960931	0.10077	0.118091		0.029	0.095509	0.0477545	0.0238772	0.0095509	0.00477545	319
426			Dorsal part of the lateral geniculate complex	0.455804	0.525535	0.462182	0.535687	0.396277	0.397128	0.349932	0.415456		0.029	0.0958084	0.0479042	0.0239521	0.00958084	0.00479042	320
427			Thalamus, polymodal association cortex related	8.24614	9.1467	8.5442	9.2038	7.08792	7.04456	6.12529	6.81887		0.029	0.0961078	0.0480539	0.0240269	0.00961078	0.00480539	321
428			Lateral group of the dorsal thalamus	1.60084	1.71692	1.62295	1.8227	1.38059	1.3959	1.16587	1.29557		0.029	0.0964072	0.0482036	0.0241018	0.00964072	0.00482036	322
429			Lateral posterior nucleus of the thalamus	0.650116	0.686682	0.638211	0.702554	0.575708	0.569756	0.471536	0.508303		0.029	0.0967066	0.0483533	0.0241766	0.00967066	0.00483533	323
430			Posterior complex of the thalamus	0.794681	0.848255	0.806586	0.914347	0.672226	0.684557	0.565078	0.621259		0.029	0.097006	0.048503	0.0242515	0.0097006	0.0048503	324
433			Anterior group of the dorsal thalamus	1.51283	1.68248	1.55705	1.66996	1.2947	1.2237	1.03619	1.18604		0.029	0.0973054	0.0486527	0.0243263	0.00973054	0.00486527	325
434			Anteroventral nucleus of thalamus	0.271697	0.295933	0.273397	0.297366	0.215146	0.207493	0.169651	0.203663		0.029	0.0976048	0.0488024	0.0244012	0.00976048	0.00488024	326
435			Anteromedial nucleus	0.351632	0.394151	0.362262	0.371815	0.2802	0.279776	0.239807	0.275117		0.029	0.0979042	0.0489521	0.024476	0.00979042	0.00489521	327
436			Anteromedial nucleus, dorsal part	0.277224	0.310814	0.284878	0.294371	0.224075	0.221524	0.187934	0.222062		0.029	0.0982036	0.0491018	0.0245509	0.00982036	0.00491018	328
437			Anteromedial nucleus, ventral part	0.0744083	0.0833373	0.0773847	0.0774435	0.0561251	0.0582512	0.0518732	0.0530552		0.029	0.098503	0.0492515	0.0246257	0.0098503	0.00492515	329
440			Interanterodorsal nucleus of the thalamus	0.0629282	0.0705816	0.0608022	0.0718813	0.0484717	0.0510229	0.0420939	0.0492044		0.029	0.0988024	0.0494012	0.0247006	0.00988024	0.00494012	330
441			Lateral dorsal nucleus of thalamus	0.679454	0.744508	0.70369	0.758604	0.610148	0.567205	0.483867	0.535258		0.029	0.0991018	0.0495509	0.0247754	0.00991018	0.00495509	331
442			Medial group of the dorsal thalamus	1.22285	1.39803	1.23433	1.38115	1.1174	1.11825	0.884822	0.98965		0.029	0.0994012	0.0497006	0.0248503	0.00994012	0.00497006	332
444			Mediodorsal nucleus of thalamus	0.883546	1.01025	0.893325	0.974248	0.838475	0.795532	0.630558	0.704693		0.029	0.0997006	0.0498503	0.0249251	0.00997006	0.00498503	333
446			Mediodorsal nucleus of the thalamus, lateral part	0.341853	0.385222	0.336751	0.40476	0.306137	0.304011	0.231304	0.255007		0.029	0.1	0.05	0.025	0.01	0.005	334
448			Submedial nucleus of the thalamus	0.178155	0.196863	0.186233	0.206231	0.139462	0.156045	0.132234	0.140767		0.029	0.100299	0.0501497	0.0250749	0.0100299	0.00501497	335
449			Perireunensis nucleus	0.0191336	0.0191336	0.0229603	0.0209654	0.0153069	0.017858	0.017858	0.0162588		0.029	0.100599	0.0502994	0.0251497	0.0100599	0.00502994	336
450			Midline group of the dorsal thalamus	1.13398	1.24241	1.19946	1.18861	0.93712	0.937971	0.845704	0.9336		0.029	0.100898	0.0504491	0.0252246	0.0100898	0.00504491	337
451			Paraventricular nucleus of the thalamus	0.474087	0.522984	0.502575	0.515577	0.391175	0.3899	0.372892	0.372242		0.029	0.101198	0.0505988	0.0252994	0.0101198	0.00505988	338
452			Parataenial nucleus	0.110124	0.12203	0.124156	0.110389	0.0977938	0.0939672	0.0850381	0.0872843		0.029	0.101497	0.0507485	0.0253743	0.0101497	0.00507485	339
453			Nucleus of reunions	0.549771	0.597392	0.572732	0.562642	0.448151	0.454104	0.387774	0.474074		0.029	0.101796	0.0508982	0.0254491	0.0101796	0.00508982	340
454			Intralaminar nuclei of the dorsal thalamus	1.24198	1.37974	1.27047	1.38799	1.07276	1.09189	0.907782	0.99778		0.029	0.102096	0.0510479	0.025524	0.0102096	0.00510479	341
455			Rhomboid nucleus	0.164974	0.187934	0.1671	0.161733	0.14499	0.143715	0.11055	0.135205		0.029	0.102395	0.0511976	0.0255988	0.0102395	0.00511976	342
456			Central medial nucleus of the thalamus	0.278925	0.311239	0.289555	0.308063	0.25639	0.267445	0.19984	0.244311		0.029	0.102695	0.0513473	0.0256737	0.0102695	0.00513473	343
457			Paracentral nucleus	0.156895	0.169651	0.147116	0.165156	0.134785	0.126282	0.104172	0.112528		0.029	0.102994	0.051497	0.0257485	0.0102994	0.0051497	344
458			Central lateral nucleus of the thalamus	0.220249	0.233855	0.210894	0.25458	0.179005	0.190911	0.161998	0.155315		0.029	0.103293	0.0516467	0.0258234	0.0103293	0.00516467	345
459			Parafascicular nucleus	0.420938	0.477064	0.455804	0.498462	0.357585	0.363538	0.331223	0.350421		0.029	0.103593	0.0517964	0.0258982	0.0103593	0.00517964	346
460			Reticular nucleus of the thalamus	1.03746	1.13909	1.13653	1.21556	0.841877	0.819343	0.867814	1.00206		0.029	0.103892	0.0519461	0.0259731	0.0103892	0.00519461	347
461			Geniculate group, ventral thalamus	0.0854633	0.0977938	0.0956679	0.0889959	0.071432	0.0710069	0.073558	0.0834336		0.029	0.104192	0.0520958	0.0260479	0.0104192	0.00520958	348
462			Intergeniculate leaflet of the lateral geniculate complex	0.0680305	0.0795106	0.0790854	0.0753042	0.0552748	0.0569756	0.0582511	0.0637518		0.029	0.104491	0.0522455	0.0261228	0.0104491	0.00522455	349
463			Ventral part of the lateral geniculate complex	0.298484	0.345255	0.327397	0.314908	0.287004	0.251713	0.241508	0.288381		0.029	0.10479	0.0523952	0.0261976	0.010479	0.00523952	350
467			Epithalamus	0.410734	0.490245	0.427742	0.44883	0.372042	0.386499	0.343554	0.330739		0.029	0.10509	0.0525449	0.0262725	0.010509	0.00525449	351
469			Lateral habenula	0.24576	0.293381	0.278925	0.26442	0.2228	0.233005	0.205792	0.189116		0.029	0.105389	0.0526946	0.0263473	0.0105389	0.00526946	352
545			superior cerebellar peduncle decussation	0.192186	0.213871	0.204091	0.220778	0.163698	0.186234	0.0335901	0.180131		0.029	0.105689	0.0528443	0.0264222	0.0105689	0.00528443	353
606			amygdalar capsule	0.143714	0.14499	0.163273	0.161305	0.107998	0.142014	0.0986442	0.131354		0.029	0.105988	0.052994	0.026497	0.0105988	0.0052994	354
155			Lateral visual area, layer 2/3	0.163698	0.19091	0.194312	0.194678	0.139037	0.143289	0.119479	0.166439		0.057	0.106287	0.0531437	0.0265719	0.0106287	0.00531437	355
159			Lateral visual area, layer 6b	0.0255114	0.0314641	0.0301885	0.0308063	0.0216847	0.0204092	0.019984	0.0278112		0.057	0.106587	0.0532934	0.0266467	0.0106587	0.00532934	356
167			Posterolateral visual area	0.406907	0.508103	0.489819	0.485199	0.375868	0.346956	0.326972	0.420163		0.057	0.106886	0.0534431	0.0267216	0.0106886	0.00534431	357
169			Posterolateral visual area, layer 2/3	0.107998	0.139037	0.130108	0.133922	0.098219	0.0952428	0.0850381	0.113384		0.057	0.107186	0.0535928	0.0267964	0.0107186	0.00535928	358
172			Posterolateral visual area, layer 6a	0.0680305	0.0841877	0.0837625	0.0800107	0.0667549	0.0625031	0.0561252	0.0782992		0.057	0.107485	0.0537425	0.0268713	0.0107485	0.00537425	359
179			posteromedial visual area, layer 6a	0.131809	0.143289	0.158171	0.155743	0.119904	0.0994947	0.104597	0.132638		0.057	0.107784	0.0538922	0.0269461	0.0107784	0.00538922	360
196			Anterior cingulate area, ventral part, layer 5	0.45708	0.474938	0.417112	0.365397	0.374168	0.276799	0.309539	0.304639		0.057	0.108084	0.0540419	0.027021	0.0108084	0.00540419	361
205			Agranular insular area, dorsal part, layer 6b	0.008929	0.0119053	0.011055	0.0111245	0.00765343	0.00680305	0.00637786	0.00898515		0.057	0.108383	0.0541916	0.0270958	0.0108383	0.00541916	362
224			Retrosplenial area, lateral agranular part, layer 6b	0.0221099	0.0191336	0.0229603	0.0205375	0.0191336	0.0148817	0.0136061	0.0171146		0.057	0.108683	0.0543413	0.0271707	0.0108683	0.00543413	363
255			Perirhinal area, layer 6b	0.0501725	0.0591015	0.0586763	0.0590453	0.0416687	0.0463458	0.0386923	0.050488		0.057	0.108982	0.054491	0.0272455	0.0108982	0.0054491	364
263			Ectorhinal area/Layer 6a	0.296358	0.354609	0.348231	0.371387	0.262342	0.266595	0.229178	0.302072		0.057	0.109281	0.0546407	0.0273204	0.0109281	0.00546407	365
301			Fasciola cinerea	0.0416687	0.0480465	0.0484717	0.0526274	0.0348656	0.0331649	0.0420939	0.031662		0.057	0.109581	0.0547904	0.0273952	0.0109581	0.00547904	366
307			Entorhinal area, lateral part, layer 2	0.0450702	0.0476213	0.0412435	0.0521995	0.0399679	0.0429443	0.0323145	0.0380799		0.057	0.10988	0.0549401	0.0274701	0.010988	0.00549401	367
310			Entorhinal area, lateral part, layer 2b	0.651817	0.753863	0.75854	0.835192	0.632258	0.609724	0.574007	0.673031		0.057	0.11018	0.0550898	0.0275449	0.011018	0.00550898	368
318			Entorhinal area, medial part, dorsal zone	2.27094	2.46398	2.45803	2.9497	1.91251	1.9006	1.71564	2.28865		0.057	0.110479	0.0552395	0.0276198	0.0110479	0.00552395	369
320			Entorhinal area, medial part, dorsal zone, layer 2	0.642463	0.676903	0.676053	0.836048	0.525535	0.53404	0.480465	0.648642		0.057	0.110778	0.0553892	0.0276946	0.0110778	0.00553892	370
323			Entorhinal area, medial part, dorsal zone, layer 3	0.494922	0.563802	0.567204	0.624255	0.443474	0.419663	0.374593	0.518572		0.057	0.111078	0.0555389	0.0277695	0.0111078	0.00555389	371
327			Entorhinal area, medial part, dorsal zone, layer 6	0.266594	0.285728	0.288704	0.323038	0.219823	0.22195	0.21132	0.269555		0.057	0.111377	0.0556886	0.0278443	0.0111377	0.00556886	372
334			Parasubiculum	0.763642	0.868239	0.847405	1.08934	0.607597	0.66925	0.599944	0.840326		0.057	0.111677	0.0558383	0.0279192	0.0111677	0.00558383	373
342			Presubiculum	0.855908	1.00217	0.96986	1.09491	0.697312	0.7798	0.666699	0.90964		0.057	0.111976	0.055988	0.027994	0.0111976	0.0055988	374
343			Presubiculum, layer 1	0.228327	0.269146	0.262768	0.312769	0.176029	0.209194	0.197288	0.25843		0.057	0.112275	0.0561377	0.0280689	0.0112275	0.00561377	375
344			Presubiculum, layer 2	0.381396	0.460906	0.446025	0.498035	0.338026	0.363113	0.298909	0.412461		0.057	0.112575	0.0562874	0.0281437	0.0112575	0.00562874	376
354			Subiculum, ventral part, stratum radiatum	0.358435	0.386498	0.395427	0.446263	0.292531	0.333775	0.30146	0.37267		0.057	0.112874	0.0564371	0.0282186	0.0112874	0.00564371	377
365			Basolateral amygdalar nucleus, ventral part	0.188785	0.198139	0.180706	0.236181	0.148817	0.173478	0.151368	0.18441		0.057	0.113174	0.0565868	0.0282934	0.0113174	0.00565868	378
368			Basomedial amygdalar nucleus, posterior part	0.592715	0.627156	0.615676	0.693997	0.476213	0.506402	0.438797	0.599866		0.057	0.113473	0.0567365	0.0283683	0.0113473	0.00567365	379
376			Olfactory tubercle	3.18127	3.03416	3.08773	4.02492	2.37171	2.57963	1.55492	3.03441		0.057	0.113772	0.0568862	0.0284431	0.0113772	0.00568862	380
378			Major island of Calleja	0.0348656	0.0429442	0.0412435	0.047493	0.0276374	0.0276374	0.0242359	0.0367963		0.057	0.114072	0.0570359	0.028518	0.0114072	0.00570359	381
380			Olfactory tubercle, molecular layer	1.06468	0.965607	1.11485	1.32039	0.75939	0.925641	0.527661	0.973391		0.057	0.114371	0.0571856	0.0285928	0.0114371	0.00571856	382
382			Olfactory tubercle, polymorph layer	0.854633	0.831672	0.792555	1.0902	0.654793	0.681156	0.396278	0.805241		0.057	0.114671	0.0573353	0.0286677	0.0114671	0.00573353	383
419			Subparafascicular area	0.0471961	0.0518732	0.0561251	0.0628961	0.0386923	0.0505977	0.0416687	0.0427864		0.057	0.11497	0.057485	0.0287425	0.011497	0.0057485	384
422			Medial geniculate complex	0.573582	0.650541	0.65947	0.704693	0.51363	0.499174	0.492371	0.577189		0.057	0.115269	0.0576347	0.0288174	0.0115269	0.00576347	385
424			Medial geniculate complex, ventral part	0.301035	0.340152	0.355034	0.389785	0.283602	0.280626	0.271697	0.31662		0.057	0.115569	0.0577844	0.0288922	0.0115569	0.00577844	386
431			Posterior limiting nucleus of the thalamus	0.0884396	0.10077	0.102471	0.121514	0.0769595	0.0880145	0.0752587	0.0958416		0.057	0.115868	0.0579341	0.0289671	0.0115868	0.00579341	387
432			Suprageniculate nucleus	0.0676053	0.0812114	0.0756839	0.0842894	0.0556999	0.0535741	0.0539992	0.0701698		0.057	0.116168	0.0580838	0.0290419	0.0116168	0.00580838	388
438			Anterodorsal nucleus	0.107998	0.142014	0.12373	0.130927	0.113101	0.0829122	0.0790854	0.0907072		0.057	0.116467	0.0582335	0.0291168	0.0116467	0.00582335	389
445			Mediodorsal nucleus of the thalamus, central part	0.15562	0.170076	0.151368	0.161305	0.135211	0.151368	0.112675	0.121086		0.057	0.116766	0.0583832	0.0291916	0.0116766	0.00583832	390
447			Mediodorsal nucleus of the thalamus, medial part	0.386073	0.454954	0.405207	0.408183	0.397128	0.340153	0.286578	0.3286		0.057	0.117066	0.0585329	0.0292665	0.0117066	0.00585329	391
514			vagus nerve	0.0306137	0.0340152	0.0518732	0.0385078	0.0272122	0.0314641	0.0165824	0.0299505		0.057	0.117365	0.0586826	0.0293413	0.0117365	0.00586826	392
515			solitary tract	0.0306137	0.0340152	0.0518732	0.0385078	0.0272122	0.0314641	0.0165824	0.0299505		0.057	0.117665	0.0588323	0.0294162	0.0117665	0.00588323	393
592			tectospinal pathway	0.167525	0.199839	0.208343	0.181415	0.13436	0.179856	0.0382671	0.148897		0.057	0.117964	0.058982	0.029491	0.0117964	0.0058982	394
119			Posterior auditory area, layer 1	0.0153069	0.0208343	0.0250862	0.0235326	0.0140313	0.0153069	0.0114801	0.0171146		0.114	0.118263	0.0591317	0.0295659	0.0118263	0.00591317	395
121			Posterior auditory area, layer 4	0.015732	0.0199839	0.0153069	0.0171146	0.0131809	0.0131809	0.0114801	0.0166867		0.114	0.118563	0.0592814	0.0296407	0.0118563	0.00592814	396
123			Posterior auditory area, layer 6a	0.0170076	0.0174328	0.0161572	0.0162589	0.0123305	0.0131809	0.0127557	0.0166867		0.114	0.118862	0.0594311	0.0297156	0.0118862	0.00594311	397
336			Parasubiculum, layer 2	0.426891	0.474938	0.467284	0.62511	0.334625	0.361837	0.317617	0.474929		0.114	0.119162	0.0595808	0.0297904	0.0119162	0.00595808	398
381			Olfactory tubercle, pyramidal layer	1.01833	0.995371	0.94945	1.30285	0.774272	0.781076	0.488119	1.00334		0.114	0.119461	0.0597305	0.0298653	0.0119461	0.00597305	399
389			Septohippocampal nucleus	0.0671801	0.0722824	0.0676053	0.072737	0.0688808	0.0484718	0.0522984	0.0624682		0.114	0.11976	0.0598802	0.0299401	0.011976	0.00598802	400
403			Medial amygdalar nucleus, posterodorsal part, sublayer b	0.0718572	0.0731327	0.0633534	0.088568	0.0667549	0.0510229	0.0574007	0.0684583		0.114	0.12006	0.0600299	0.030015	0.012006	0.00600299	401
417			Subparafascicular nucleus, magnocellular part	0.0544244	0.0756839	0.0637786	0.0676026	0.0569755	0.046771	0.0484717	0.0637518		0.114	0.120359	0.0601796	0.0300898	0.0120359	0.00601796	402
439			Interanteromedial nucleus of the thalamus	0.0391175	0.0352908	0.0331649	0.0393636	0.0276374	0.0352908	0.0216847	0.0320898		0.114	0.120659	0.0603293	0.0301647	0.0120659	0.00603293	403
443			Intermediodorsal nucleus of the thalamus	0.142014	0.171777	0.131809	0.179703	0.124156	0.148817	0.104172	0.127931		0.114	0.120958	0.060479	0.0302395	0.0120958	0.0060479	404
468			Medial habenula	0.164974	0.196863	0.148817	0.18441	0.149242	0.153494	0.137762	0.141623		0.114	0.121257	0.0606287	0.0303144	0.0121257	0.00606287	405
485			superior colliculus commissure	0.0221099	0.0212595	0.0280626	0.0256719	0.0182832	0.0233855	0.0170076	0.0179703		0.114	0.121557	0.0607784	0.0303892	0.0121557	0.00607784	406
491			posterior commissure	0.0310389	0.0331649	0.0361412	0.0402193	0.0250862	0.0293382	0.0344404	0.0222489		0.114	0.121856	0.0609281	0.0304641	0.0121856	0.00609281	407
562			external capsule	1.50432	1.64464	1.79983	1.65455	1.17735	1.65229	1.26494	1.37002		0.114	0.122156	0.0610778	0.0305389	0.0122156	0.00610778	408
594			doral tegmental decussation	0.0306137	0.0340152	0.026787	0.0372242	0.0242359	0.0276374	0.0123305	0.028239		0.114	0.122455	0.0612275	0.0306138	0.0122455	0.00612275	409
170			Posterolateral visual area, layer 4	0.0416687	0.0561251	0.0608022	0.0590453	0.0454954	0.0391176	0.0429442	0.0509159		0.2	0.122754	0.0613772	0.0306886	0.0122754	0.00613772	410
217			Agranular insular area, ventral part, layer 6b	0.000850381	0.000850381	0	0.000427865	0.00042519	0	0	0.000427864		0.2	0.123054	0.0615269	0.0307635	0.0123054	0.00615269	411
321			Entorhinal area, medial part, dorsal zone, layer 2a	0.0127557	0.0148817	0.0144565	0.0188261	0.00595267	0.0093542	0.00935419	0.0149753		0.2	0.123353	0.0616766	0.0308383	0.0123353	0.00616766	412
330			Entorhinal area, medial part, ventral zone, layer 2	0.0914159	0.0718572	0.0667549	0.112528	0.0646289	0.0714321	0.0663297	0.0881401		0.2	0.123653	0.0618263	0.0309132	0.0123653	0.00618263	413
331			Entorhinal area, medial part, ventral zone, layer 3	0.0174328	0.0165824	0.0174328	0.0213932	0.0131809	0.0140313	0.0123305	0.0201096		0.2	0.123952	0.061976	0.030988	0.0123952	0.0061976	414
333			Entorhinal area, medial part, ventral zone, layer 5/6	0.00170076	0.000850381	0.00127557	0.00213932	0	0.000425191	0.000850381	0.00128359		0.2	0.124251	0.0621257	0.0310629	0.0124251	0.00621257	415
369			Posterior amygdalar nucleus	0.253413	0.251713	0.2228	0.324749	0.203666	0.208344	0.20069	0.258858		0.2	0.124551	0.0622754	0.0311377	0.0124551	0.00622754	416
377			Islands of Calleja	0.208768	0.198564	0.189635	0.263993	0.15562	0.164124	0.118628	0.215644		0.2	0.12485	0.0624251	0.0312126	0.012485	0.00624251	417
405			Medial amygdalar nucleus, posteroventral part	0.0544244	0.0561251	0.0599519	0.0684584	0.0450702	0.0416687	0.0395427	0.0607567		0.2	0.12515	0.0625749	0.0312874	0.012515	0.00625749	418
471	fiber tracts		fiber tracts	25.7767	28.1374	35.287	31.0835	22.2532	32.7559	24.536	24.2514		0.2	0.125449	0.0627246	0.0313623	0.0125449	0.00627246	419
482			optic nerve	1.0617	1.13909	1.5698	1.23867	0.908632	1.40356	1.05362	0.972964		0.2	0.125749	0.0628743	0.0314371	0.0125749	0.00628743	420
484			brachium of the superior colliculus	0.287854	0.343129	0.31294	0.344859	0.264043	0.295508	0.332499	0.265276		0.2	0.126048	0.063024	0.031512	0.0126048	0.0063024	421
486			optic chiasm	0.103746	0.113101	0.238107	0.136917	0.0863137	0.225351	0.08929	0.0924187		0.2	0.126347	0.0631737	0.0315868	0.0126347	0.00631737	422
487			optic tract	0.64799	0.661596	0.990694	0.731221	0.539992	0.859311	0.614826	0.597299		0.2	0.126647	0.0633234	0.0316617	0.0126647	0.00633234	423
489			oculomotor nerve	0.844428	0.926915	0.855058	1.12443	0.781925	0.987718	0.755564	0.785559		0.2	0.126946	0.0634731	0.0317365	0.0126946	0.00634731	424
490			medial longitudinal fascicle	0.813389	0.89375	0.818917	1.08421	0.756839	0.95838	0.721123	0.76331		0.2	0.127246	0.0636228	0.0318114	0.0127246	0.00636228	425
495			trigeminal nerve	1.12718	1.239	1.74371	1.39227	0.956678	1.51623	1.04342	1.10646		0.2	0.127545	0.0637725	0.0318862	0.0127545	0.00637725	426
496			motor root of the trigeminal nerve	0.133935	0.146265	0.221099	0.142479	0.104597	0.206218	0.0297633	0.108678		0.2	0.127844	0.0639222	0.0319611	0.0127844	0.00639222	427
500			facial nerve	0.167525	0.185383	0.307413	0.20837	0.143289	0.30146	0.0454954	0.154031		0.2	0.128144	0.0640719	0.0320359	0.0128144	0.00640719	428
503			vestibulocochlear nerve	1.54514	1.72797	2.05027	2.03065	1.30108	1.95885	0.820193	1.63872		0.2	0.128443	0.0642216	0.0321108	0.0128443	0.00642216	429
506			cochlear nerve	1.41503	1.58468	1.81429	1.88218	1.19138	1.71139	0.714745	1.51721		0.2	0.128743	0.0643713	0.0321856	0.0128743	0.00643713	430
510			lateral lemniscus	0.834223	0.928616	1.03959	1.16336	0.720698	0.931168	0.257665	0.924615		0.2	0.129042	0.064521	0.0322605	0.0129042	0.0064521	431
541			cerebellum related fiber tracts	6.98758	7.34814	10.8925	8.17265	6.15676	9.14501	4.76469	6.14328		0.2	0.129341	0.0646707	0.0323353	0.0129341	0.00646707	432
558			arbor vitae	4.7481	4.98111	8.00676	5.24562	4.2332	6.019	2.80753	3.92394		0.2	0.129641	0.0648204	0.0324102	0.0129641	0.00648204	433
608			anterior commissure, temporal limb	0.133935	0.14414	0.168801	0.153603	0.11055	0.152218	0.139462	0.10611		0.2	0.12994	0.0649701	0.032485	0.012994	0.00649701	434
642			mammillary related	0.161147	0.221949	0.220249	0.237893	0.147541	0.198564	0.175179	0.198101		0.2	0.13024	0.0651198	0.0325599	0.013024	0.00651198	435
644			mammilothalmic tract	0.0807862	0.113951	0.11055	0.103543	0.0705816	0.0952428	0.0901404	0.100976		0.2	0.130539	0.0652695	0.0326347	0.0130539	0.00652695	436
279			Field CA3, stratum lacunosum-moleculare	0.0548496	0.0518732	0.0557	0.0509159	0.0365664	0.0586763	0.0450702	0.0457815		0.343	0.130838	0.0654192	0.0327096	0.0130838	0.00654192	437
335			Parasubiculum, layer 1	0.12288	0.14499	0.147966	0.20238	0.107148	0.125857	0.122455	0.152748		0.343	0.131138	0.0655689	0.0327844	0.0131138	0.00655689	438
420			Peripeduncular nucleus	0.0744083	0.098219	0.0931167	0.10012	0.087164	0.0765344	0.0710068	0.0932744		0.343	0.131437	0.0657186	0.0328593	0.0131437	0.00657186	439
472			cranial nerves	7.69637	8.98597	11.0613	10.4022	6.98758	10.9627	7.02457	8.29629		0.343	0.131737	0.0658683	0.0329341	0.0131737	0.00658683	440
497			sensory root of the trigeminal nerve	0.91501	1.01365	1.4027	1.14112	0.787453	1.20882	0.95923	0.904505		0.343	0.132036	0.066018	0.033009	0.0132036	0.0066018	441
498			midbrain tract of the trigeminal nerve	0.0119053	0.0153069	0.017858	0.0141195	0.0127557	0.0148817	0.00127557	0.0128359		0.343	0.132335	0.0661677	0.0330838	0.0132335	0.00661677	442
499			spinal tract of the trigeminal nerve	0.903104	0.998347	1.38485	1.127	0.774697	1.19394	0.957954	0.891669		0.343	0.132635	0.0663174	0.0331587	0.0132635	0.00663174	443
502			genu of the facial nerve	0.071432	0.0722824	0.119053	0.0804386	0.0556999	0.121179	0.00807862	0.0611846		0.343	0.132934	0.0664671	0.0332335	0.0132934	0.00664671	444
505			vestibular nerve	0.104597	0.114376	0.197288	0.112528	0.0897152	0.210469	0.0697312	0.0932744		0.343	0.133234	0.0666168	0.0333084	0.0133234	0.00666168	445
512			brachium of the inferior colliculus	0.326121	0.375018	0.344829	0.36668	0.258941	0.375869	0.19006	0.324749		0.343	0.133533	0.0667665	0.0333832	0.0133533	0.00667665	446
542			cerebellar commissure	0.273397	0.248736	0.332499	0.311486	0.242359	0.377995	0.209194	0.209226		0.343	0.133832	0.0669162	0.0334581	0.0133832	0.00669162	447
544			superior cerebelar peduncles	1.1072	1.24751	1.36146	1.299	0.96093	1.48137	0.995796	1.038		0.343	0.134132	0.0670659	0.0335329	0.0134132	0.00670659	448
550			inferior cerebellar peduncle	0.537015	0.653518	0.988143	0.715818	0.508528	0.883121	0.517032	0.56307		0.343	0.134431	0.0672156	0.0336078	0.0134431	0.00672156	449
559			lateral forebrain bundle system	5.82766	6.16016	6.82983	6.91515	4.81316	6.59301	6.21969	5.40778		0.343	0.134731	0.0673653	0.0336826	0.0134731	0.00673653	450
561			corpus callosum, anterior forceps	2.21567	2.34918	2.48779	2.42514	1.75561	2.43422	2.27775	1.95192		0.343	0.13503	0.067515	0.0337575	0.013503	0.0067515	451
568			corticospinal tract	3.44744	3.65791	3.98021	4.42583	2.93211	3.93897	3.87646	3.41906		0.343	0.135329	0.0676647	0.0338323	0.0135329	0.00676647	452
570			cerebal peduncle	1.38357	1.50602	1.85298	1.9562	1.24071	1.68248	1.42354	1.47913		0.343	0.135629	0.0678144	0.0339072	0.0135629	0.00678144	453
596			rubrospinal tract	0.335475	0.370341	0.426466	0.409894	0.292531	0.43497	0.277649	0.324749		0.343	0.135928	0.0679641	0.033982	0.0135928	0.00679641	454
645			mammillotegmental tract	0.0539992	0.0739831	0.0608022	0.0860008	0.0539992	0.0663298	0.0484717	0.0594731		0.343	0.136228	0.0681138	0.0340569	0.0136228	0.00681138	455
646			mammillary peduncle	0.0174328	0.0216847	0.0280626	0.0290948	0.0140313	0.0233855	0.0208343	0.0201096		0.343	0.136527	0.0682635	0.0341317	0.0136527	0.00682635	456
652			habenular commissure	0.0272122	0.0306137	0.0331649	0.0260998	0.0191336	0.0229603	0.0348656	0.0209654		0.343	0.136826	0.0684132	0.0342066	0.0136826	0.00684132	457
322			Entorhinal area, medial part, dorsal zone, layer 2b	0.0110549	0.00977938	0.0114801	0.0124081	0.0102046	0.0119053	0.0102046	0.00941302		0.486	0.137126	0.0685629	0.0342814	0.0137126	0.00685629	458
329			Entorhinal area, medial part, ventral zone, layer 1	0.0850381	0.0914159	0.0620778	0.113812	0.0744083	0.0748336	0.0680305	0.0894237		0.486	0.137425	0.0687126	0.0343563	0.0137425	0.00687126	459
474			vomeronasal nerve	0.015732	0.0272122	0.0280626	0.025244	0.0153069	0.0403931	0.0114801	0.0213932		0.486	0.137725	0.0688623	0.0344311	0.0137725	0.00688623	460
476			olfactory nerve layer of main olfactory bulb	1.08424	1.50432	1.56683	1.92069	1.2305	1.34956	1.04044	1.59593		0.486	0.138024	0.069012	0.034506	0.0138024	0.0069012	461
477			lateral olfactory tract, general	0.544669	0.675628	1.02428	0.768017	0.517457	1.17905	0.50215	0.612702		0.486	0.138323	0.0691617	0.0345808	0.0138323	0.00691617	462
478			lateral olfactory tract, body	0.538716	0.667124	1.00473	0.757749	0.508953	1.16375	0.497048	0.604572		0.486	0.138623	0.0693114	0.0346557	0.0138623	0.00693114	463
507			trapezoid body	0.252138	0.277649	0.426041	0.350849	0.209619	0.40053	0.266169	0.266987		0.486	0.138922	0.0694611	0.0347305	0.0138922	0.00694611	464
511			inferior colliculus commissure	0.00255114	0.00340152	0.00382671	0.00128359	0.00212595	0.00382672	0.000850381	0.000855729		0.486	0.139222	0.0696108	0.0348054	0.0139222	0.00696108	465
543			cerebellar peduncles	1.96608	2.1183	2.55327	2.61554	1.6812	2.74801	1.74796	2.01011		0.486	0.139521	0.0697605	0.0348802	0.0139521	0.00697605	466
575			pyramid	0.17858	0.197714	0.11055	0.262709	0.159021	0.137762	0.192186	0.177564		0.486	0.13982	0.0699102	0.0349551	0.013982	0.00699102	467
584			extrapyramidal fiber systems	0.0948174	0.101621	0.0807862	0.129215	0.0837625	0.102046	0.0591015	0.0847171		0.486	0.14012	0.0700599	0.0350299	0.014012	0.00700599	468
597			ventral tegmental decussation	0.0642037	0.0676053	0.0539992	0.0919909	0.0595267	0.0744084	0.046771	0.0564781		0.486	0.140419	0.0702096	0.0351048	0.0140419	0.00702096	469
626			hypothalamus related	0.673927	0.798508	0.779374	0.803102	0.573157	0.748336	0.957529	0.639229		0.486	0.140719	0.0703593	0.0351796	0.0140719	0.00703593	470
649			epithalamus related	0.499599	0.557425	0.537866	0.541249	0.409458	0.532339	0.760666	0.423158		0.486	0.141018	0.070509	0.0352545	0.0141018	0.0070509	471
175			posteromedial visual area, layer 1	0.0914159	0.109274	0.151793	0.111673	0.0799358	0.118203	0.124156	0.0907072		0.686	0.141317	0.0706587	0.0353293	0.0141317	0.00706587	472
302			Induseum griseum	0.0242358	0.0318893	0.026787	0.0183982	0.0263618	0.0216847	0.0242359	0.0201096		0.686	0.141617	0.0708084	0.0354042	0.0141617	0.00708084	473
328			Entorhinal area, medial part, ventral zone	0.195588	0.180706	0.147541	0.249873	0.152218	0.160722	0.147541	0.198957		0.686	0.141916	0.0709581	0.035479	0.0141916	0.00709581	474
479			dorsal limb	0.00595266	0.00850381	0.0195588	0.0102688	0.00850381	0.0153069	0.00510229	0.00812942		0.686	0.142216	0.0711078	0.0355539	0.0142216	0.00711078	475
549			middle cerebellar peduncle	1.23688	1.29938	1.64081	1.74697	1.03406	1.76794	0.832523	1.31183		0.686	0.142515	0.0712575	0.0356287	0.0142515	0.00712575	476
560			corpus callosum	4.95134	5.03425	6.00709	4.88964	3.76974	5.8974	5.27534	3.67407		0.686	0.142814	0.0714072	0.0357036	0.0142814	0.00714072	477
565			corpus callosum, posterior forceps	0.282326	0.28998	0.498323	0.309774	0.238107	0.342279	0.336326	0.221634		0.686	0.143114	0.0715569	0.0357784	0.0143114	0.00715569	478
567			corpus callosum, splenium	0.0850381	0.0952426	0.15647	0.0992646	0.0761091	0.121605	0.117778	0.0616125		0.686	0.143413	0.0717066	0.0358533	0.0143413	0.00717066	479
579			thalamus related	0.194312	0.212595	0.183257	0.223345	0.165824	0.205792	0.239807	0.178847		0.686	0.143713	0.0718563	0.0359281	0.0143713	0.00718563	480
580			external medullary lamina of the thalamus	0.184107	0.199414	0.171352	0.210082	0.15732	0.193037	0.223225	0.167295		0.686	0.144012	0.072006	0.036003	0.0144012	0.0072006	481
605			cerebrum related	4.49639	4.743	5.64313	4.66116	3.63878	5.20476	5.51047	3.68006		0.686	0.144311	0.0721557	0.0360778	0.0144311	0.00721557	482
609			cingulum bundle	0.382246	0.389049	0.604196	0.346143	0.286578	0.542544	0.492796	0.247306		0.686	0.144611	0.0723054	0.0361527	0.0144611	0.00723054	483
610			fornix system	3.26419	3.48103	4.15879	3.36516	2.66637	3.77399	4.13243	2.70111		0.686	0.14491	0.0724551	0.0362275	0.014491	0.00724551	484
611			alveus	1.03874	1.14164	1.47626	1.10304	0.813389	1.17608	1.20542	0.872843		0.686	0.14521	0.0726048	0.0363024	0.014521	0.00726048	485
612			dorsal fornix	0.0897152	0.087164	0.155195	0.0723092	0.0701564	0.128833	0.136486	0.050488		0.686	0.145509	0.0727545	0.0363772	0.0145509	0.00727545	486
619			hippocampal commissures	0.636085	0.713044	0.91501	0.665758	0.530212	0.798508	0.819342	0.545955		0.686	0.145808	0.0729042	0.0364521	0.0145808	0.00729042	487
620			dorsal hippocampal commissure	0.504276	0.569755	0.751737	0.545528	0.419663	0.599944	0.578259	0.442412		0.686	0.146108	0.0730539	0.0365269	0.0146108	0.00730539	488
635			supramammillary decussation	0.0131809	0.0191336	0.0212595	0.0239604	0.0161572	0.0174328	0.0216847	0.0179703		0.686	0.146407	0.0732036	0.0366018	0.0146407	0.00732036	489
651			fasciculus retroflexus	0.156045	0.205367	0.173478	0.201952	0.145415	0.169651	0.237256	0.160449		0.686	0.146707	0.0733533	0.0366766	0.0146707	0.00733533	490
2			Somatomotor areas, Layer 1	0	0	0	0	0	0	0	0		1	0.147006	0.073503	0.0367515	0.0147006	0.0073503	491
3			Somatomotor areas, Layer 2/3	0	0	0	0	0	0	0	0		1	0.147305	0.0736527	0.0368263	0.0147305	0.00736527	492
4			Somatomotor areas, Layer 5	0	0	0	0	0	0	0	0		1	0.147605	0.0738024	0.0369012	0.0147605	0.00738024	493
5			Somatomotor areas, Layer 6a	0	0	0	0	0	0	0	0		1	0.147904	0.0739521	0.036976	0.0147904	0.00739521	494
6			Somatomotor areas, Layer 6b	0	0	0	0	0	0	0	0		1	0.148204	0.0741018	0.0370509	0.0148204	0.00741018	495
20			Somatosensory areas, layer 1	0	0	0	0	0	0	0	0		1	0.148503	0.0742515	0.0371257	0.0148503	0.00742515	496
21			Somatosensory areas, layer 2/3	0	0	0	0	0	0	0	0		1	0.148802	0.0744012	0.0372006	0.0148802	0.00744012	497
22			Somatosensory areas, layer 4	0	0	0	0	0	0	0	0		1	0.149102	0.0745509	0.0372754	0.0149102	0.00745509	498
23			Somatosensory areas, layer 5	0	0	0	0	0	0	0	0		1	0.149401	0.0747006	0.0373503	0.0149401	0.00747006	499
24			Somatosensory areas, layer 6a	0	0	0	0	0	0	0	0		1	0.149701	0.0748503	0.0374251	0.0149701	0.00748503	500
25			Somatosensory areas, layer 6b	0	0	0	0	0	0	0	0		1	0.15	0.075	0.0375	0.015	0.0075	501
27			Primary somatosensory area, layer 1	0	0	0	0	0	0	0	0		1	0.150299	0.0751497	0.0375749	0.0150299	0.00751497	502
28			Primary somatosensory area, layer 2/3	0	0	0	0	0	0	0	0		1	0.150599	0.0752994	0.0376497	0.0150599	0.00752994	503
29			Primary somatosensory area, layer 4	0	0	0	0	0	0	0	0		1	0.150898	0.0754491	0.0377246	0.0150898	0.00754491	504
30			Primary somatosensory area, layer 5	0	0	0	0	0	0	0	0		1	0.151198	0.0755988	0.0377994	0.0151198	0.00755988	505
31			Primary somatosensory area, layer 6a	0	0	0	0	0	0	0	0		1	0.151497	0.0757485	0.0378743	0.0151497	0.00757485	506
32			Primary somatosensory area, layer 6b	0	0	0	0	0	0	0	0		1	0.151796	0.0758982	0.0379491	0.0151796	0.00758982	507
124			Posterior auditory area, layer 6b	0.00467709	0.00382671	0.00340152	0.00556224	0.00382671	0.00425191	0.00255114	0.00513437		1	0.152096	0.0760479	0.038024	0.0152096	0.00760479	508
133			Visual areas, layer 1	0	0	0	0	0	0	0	0		1	0.152395	0.0761976	0.0380988	0.0152395	0.00761976	509
134			Visual areas, layer 2/3	0	0	0	0	0	0	0	0		1	0.152695	0.0763473	0.0381737	0.0152695	0.00763473	510
135			Visual areas, layer 4	0	0	0	0	0	0	0	0		1	0.152994	0.076497	0.0382485	0.0152994	0.0076497	511
136			Visual areas, layer 5	0	0	0	0	0	0	0	0		1	0.153293	0.0766467	0.0383234	0.0153293	0.00766467	512
137			Visual areas, layer 6a	0	0	0	0	0	0	0	0		1	0.153593	0.0767964	0.0383982	0.0153593	0.00767964	513
138			Visual areas, layer 6b	0	0	0	0	0	0	0	0		1	0.153892	0.0769461	0.0384731	0.0153892	0.00769461	514
182			Anterior cingulate area, layer 1	0	0	0	0	0	0	0	0		1	0.154192	0.0770958	0.0385479	0.0154192	0.00770958	515
183			Anterior cingulate area, layer 2/3	0	0	0	0	0	0	0	0		1	0.154491	0.0772455	0.0386228	0.0154491	0.00772455	516
184			Anterior cingulate area, layer 5	0	0	0	0	0	0	0	0		1	0.15479	0.0773952	0.0386976	0.015479	0.00773952	517
185			Anterior cingulate area, layer 6a	0	0	0	0	0	0	0	0		1	0.15509	0.0775449	0.0387725	0.015509	0.00775449	518
186			Anterior cingulate area, layer 6b	0	0	0	0	0	0	0	0		1	0.155389	0.0776946	0.0388473	0.0155389	0.00776946	519
211			Agranular insular area, posterior part, layer 6b	0	0	0	0	0	0	0	0		1	0.155689	0.0778443	0.0389222	0.0155689	0.00778443	520
228			Retrosplenial area, dorsal part, layer 4	0	0	0	0	0	0	0	0		1	0.155988	0.077994	0.038997	0.0155988	0.0077994	521
288			Dentate gyrus, subgranular zone	0	0	0	0	0	0	0	0		1	0.156287	0.0781437	0.0390719	0.0156287	0.00781437	522
289			Dentate gyrus crest	0	0	0	0	0	0	0	0		1	0.156587	0.0782934	0.0391467	0.0156587	0.00782934	523
290			Dentate gyrus crest, molecular layer	0	0	0	0	0	0	0	0		1	0.156886	0.0784431	0.0392216	0.0156886	0.00784431	524
291			Dentate gyrus crest, polymorph layer	0	0	0	0	0	0	0	0		1	0.157186	0.0785928	0.0392964	0.0157186	0.00785928	525
292			Dentate gyrus crest, granule cell layer	0	0	0	0	0	0	0	0		1	0.157485	0.0787425	0.0393713	0.0157485	0.00787425	526
293			Dentate gyrus lateral blade	0	0	0	0	0	0	0	0		1	0.157784	0.0788922	0.0394461	0.0157784	0.00788922	527
294			Dentate gyrus lateral blade, molecular layer	0	0	0	0	0	0	0	0		1	0.158084	0.0790419	0.039521	0.0158084	0.00790419	528
295			Dentate gyrus lateral blade, polymorph layer	0	0	0	0	0	0	0	0		1	0.158383	0.0791916	0.0395958	0.0158383	0.00791916	529
296			Dentate gyrus lateral blade, granule cell layer	0	0	0	0	0	0	0	0		1	0.158683	0.0793413	0.0396707	0.0158683	0.00793413	530
297			Dentate gyrus medial blade	0	0	0	0	0	0	0	0		1	0.158982	0.079491	0.0397455	0.0158982	0.0079491	531
298			Dentate gyrus medial blade, molecular layer	0	0	0	0	0	0	0	0		1	0.159281	0.0796407	0.0398204	0.0159281	0.00796407	532
299			Dentate gyrus medial blade, polymorph layer	0	0	0	0	0	0	0	0		1	0.159581	0.0797904	0.0398952	0.0159581	0.00797904	533
300			Dentate gyrus medial blade, granule cell layer	0	0	0	0	0	0	0	0		1	0.15988	0.0799401	0.0399701	0.015988	0.00799401	534
315			Entorhinal area, lateral part, layer 5/6	0	0	0	0	0	0	0	0		1	0.16018	0.0800898	0.0400449	0.016018	0.00800898	535
326			Entorhinal area, medial part, dorsal zone, layer 5/6	0	0	0	0	0	0	0	0		1	0.160479	0.0802395	0.0401198	0.0160479	0.00802395	536
332			Entorhinal area, medial part, ventral zone, layer 4	0	0	0	0	0	0	0	0		1	0.160778	0.0803892	0.0401946	0.0160778	0.00803892	537
356			Layer 6b, isocortex	0	0	0	0	0	0	0	0		1	0.161078	0.0805389	0.0402695	0.0161078	0.00805389	538
379			Olfactory tubercle, layers 1-3	0	0	0	0	0	0	0	0		1	0.161377	0.0806886	0.0403443	0.0161377	0.00806886	539
464			Ventral part of the lateral geniculate complex, lateral zone	0	0	0	0	0	0	0	0		1	0.161677	0.0808383	0.0404192	0.0161677	0.00808383	540
465			Ventral part of the lateral geniculate complex, medial zone	0	0	0	0	0	0	0	0		1	0.161976	0.080988	0.040494	0.0161976	0.0080988	541
466			Subgeniculate nucleus	0.0174328	0.0182832	0.0165824	0.0136917	0.0161572	0.0140313	0.0153069	0.0196818		1	0.162275	0.0811377	0.0405689	0.0162275	0.00811377	542
470			Pineal body	0	0	0	0	0	0	0	0		1	0.162575	0.0812874	0.0406437	0.0162575	0.00812874	543
473			terminal nerve	0	0	0	0	0	0	0	0		1	0.162874	0.0814371	0.0407186	0.0162874	0.00814371	544
475			olfactory nerve	2.32664	3.05882	3.94619	3.64027	2.3951	4.06993	2.47631	3.02372		1	0.163174	0.0815868	0.0407934	0.0163174	0.00815868	545
480			accessory olfactory tract	0	0	0	0	0	0	0	0		1	0.163473	0.0817365	0.0408683	0.0163473	0.00817365	546
481			anterior commissure, olfactory limb	0.697737	0.878869	1.35508	0.951571	0.64714	1.54132	0.933718	0.815082		1	0.163772	0.0818862	0.0409431	0.0163772	0.00818862	547
483			accessory optic tract	0	0	0	0	0	0	0	0		1	0.164072	0.0820359	0.041018	0.0164072	0.00820359	548
488			tectothalamic pathway	0	0	0	0	0	0	0	0		1	0.164371	0.0821856	0.0410928	0.0164371	0.00821856	549
492			trochlear nerve	0	0	0	0	0	0	0	0		1	0.164671	0.0823353	0.0411677	0.0164671	0.00823353	550
493			trochlear nerve decussation	0	0	0	0	0	0	0	0		1	0.16497	0.082485	0.0412425	0.016497	0.0082485	551
494			abducens nerve	0	0	0	0	0	0	0	0		1	0.165269	0.0826347	0.0413174	0.0165269	0.00826347	552
501			intermediate nerve	0	0	0	0	0	0	0	0		1	0.165569	0.0827844	0.0413922	0.0165569	0.00827844	553
504			efferent cochleovestibular bundle	0	0	0	0	0	0	0	0		1	0.165868	0.0829341	0.0414671	0.0165868	0.00829341	554
508			intermediate acoustic stria	0	0	0	0	0	0	0	0		1	0.166168	0.0830838	0.0415419	0.0166168	0.00830838	555
509			dorsal acoustic stria	0	0	0	0	0	0	0	0		1	0.166467	0.0832335	0.0416168	0.0166467	0.00832335	556
513			glossopharyngeal nerve	0	0	0	0	0	0	0	0		1	0.166766	0.0833832	0.0416916	0.0166766	0.00833832	557
516			accessory spinal nerve	0	0	0	0	0	0	0	0		1	0.167066	0.0835329	0.0417665	0.0167066	0.00835329	558
517			hypoglossal nerve	0	0	0	0	0	0	0	0		1	0.167365	0.0836826	0.0418413	0.0167365	0.00836826	559
518			ventral roots	0	0	0	0	0	0	0	0		1	0.167665	0.0838323	0.0419162	0.0167665	0.00838323	560
519			dorsal roots	0.777248	0.868664	0.855908	0.976387	0.630557	0.971561	0.929467	0.777857		1	0.167964	0.083982	0.041991	0.0167964	0.0083982	561
520			cervicothalamic tract	0.777248	0.868664	0.855908	0.976387	0.630557	0.971561	0.929467	0.777857		1	0.168263	0.0841317	0.0420659	0.0168263	0.00841317	562
521			dorsolateral fascicle	0	0	0	0	0	0	0	0		1	0.168563	0.0842814	0.0421407	0.0168563	0.00842814	563
522			dorsal commissure of the spinal cord	0	0	0	0	0	0	0	0		1	0.168862	0.0844311	0.0422156	0.0168862	0.00844311	564
523			ventral commissure of the spinal cord	0	0	0	0	0	0	0	0		1	0.169162	0.0845808	0.0422904	0.0169162	0.00845808	565
524			fasciculus proprius	0	0	0	0	0	0	0	0		1	0.169461	0.0847305	0.0423653	0.0169461	0.00847305	566
525			dorsal column	0.0318893	0.0352908	0	0.0427865	0.0314641	0	0.0557	0.0325177		1	0.16976	0.0848802	0.0424401	0.016976	0.00848802	567
526			cuneate fascicle	0.026787	0.0289129	0	0.034657	0.0255114	0	0.0480465	0.0273833		1	0.17006	0.0850299	0.042515	0.017006	0.00850299	568
527			gracile fascicle	0.00510228	0.00637786	0	0.00812943	0.00595267	0	0.00765343	0.00513437		1	0.170359	0.0851796	0.0425898	0.0170359	0.00851796	569
528			internal arcuate fibers	0	0	0	0	0	0	0	0		1	0.170659	0.0853293	0.0426647	0.0170659	0.00853293	570
529			medial lemniscus	0.745359	0.833373	0.855908	0.933601	0.599093	0.971561	0.873767	0.74534		1	0.170958	0.085479	0.0427395	0.0170958	0.0085479	571
530			spinothalamic tract	0	0	0	0	0	0	0	0		1	0.171257	0.0856287	0.0428144	0.0171257	0.00856287	572
531			lateral spinothalamic tract	0	0	0	0	0	0	0	0		1	0.171557	0.0857784	0.0428892	0.0171557	0.00857784	573
532			ventral spinothalamic tract	0	0	0	0	0	0	0	0		1	0.171856	0.0859281	0.0429641	0.0171856	0.00859281	574
533			spinocervical tract	0	0	0	0	0	0	0	0		1	0.172156	0.0860778	0.0430389	0.0172156	0.00860778	575
534			spino-olivary pathway	0	0	0	0	0	0	0	0		1	0.172455	0.0862275	0.0431138	0.0172455	0.00862275	576
535			spinoreticular pathway	0	0	0	0	0	0	0	0		1	0.172754	0.0863772	0.0431886	0.0172754	0.00863772	577
536			spinovestibular pathway	0	0	0	0	0	0	0	0		1	0.173054	0.0865269	0.0432635	0.0173054	0.00865269	578
537			spinotectal pathway	0	0	0	0	0	0	0	0		1	0.173353	0.0866766	0.0433383	0.0173353	0.00866766	579
538			spinohypothalamic pathway	0	0	0	0	0	0	0	0		1	0.173653	0.0868263	0.0434132	0.0173653	0.00868263	580
539			spinotelenchephalic pathway	0	0	0	0	0	0	0	0		1	0.173952	0.086976	0.043488	0.0173952	0.0086976	581
540			hypothalamohypophysial tract	0	0	0	0	0	0	0	0		1	0.174251	0.0871257	0.0435629	0.0174251	0.00871257	582
546			spinocerebellar tract	0	0	0	0	0	0	0	0		1	0.174551	0.0872754	0.0436377	0.0174551	0.00872754	583
547			uncinate fascicle	0	0	0	0	0	0	0	0		1	0.17485	0.0874251	0.0437126	0.017485	0.00874251	584
548			ventral spinocerebellar tract	0.729201	0.818917	0.912459	0.868566	0.64714	0.980065	0.915435	0.698275		1	0.17515	0.0875749	0.0437874	0.017515	0.00875749	585
551			dorsal spinocerebellar tract	0	0	0	0	0	0	0	0		1	0.175449	0.0877246	0.0438623	0.0175449	0.00877246	586
552			cuneocerebellar tract	0	0	0	0	0	0	0	0		1	0.175749	0.0878743	0.0439371	0.0175749	0.00878743	587
553			juxtarestiform body	0	0	0	0	0	0	0	0		1	0.176048	0.088024	0.044012	0.0176048	0.0088024	588
554			bulbocerebellar tract	0	0	0	0	0	0	0	0		1	0.176347	0.0881737	0.0440868	0.0176347	0.00881737	589
555			olivocerebellar tract	0	0	0	0	0	0	0	0		1	0.176647	0.0883234	0.0441617	0.0176647	0.00883234	590
556			reticulocerebellar tract	0	0	0	0	0	0	0	0		1	0.176946	0.0884731	0.0442365	0.0176946	0.00884731	591
557			trigeminocerebellar tract	0	0	0	0	0	0	0	0		1	0.177246	0.0886228	0.0443114	0.0177246	0.00886228	592
563			corpus callosum, extreme capsule	0	0	0	0	0	0	0	0		1	0.177545	0.0887725	0.0443862	0.0177545	0.00887725	593
564			genu of corpus callosum	0.429442	0.398403	0.363538	0.38465	0.323145	0.503851	0.466009	0.287525		1	0.177844	0.0889222	0.0444611	0.0177844	0.00889222	594
566			corpus callosum, rostrum	0	0	0	0	0	0	0	0		1	0.178144	0.0890719	0.0445359	0.0178144	0.00890719	595
569			internal capsule	1.77007	1.81556	1.86489	2.02466	1.43289	1.94695	2.1791	1.63145		1	0.178443	0.0892216	0.0446108	0.0178443	0.00892216	596
571			corticotectal tract	0	0	0	0	0	0	0	0		1	0.178743	0.0893713	0.0446856	0.0178743	0.00893713	597
572			corticorubral tract	0	0	0	0	0	0	0	0		1	0.179042	0.089521	0.0447605	0.0179042	0.0089521	598
573			corticopontine tract	0	0	0	0	0	0	0	0		1	0.179341	0.0896707	0.0448353	0.0179341	0.00896707	599
574			corticobulbar tract	0	0	0	0	0	0	0	0		1	0.179641	0.0898204	0.0449102	0.0179641	0.00898204	600
576			pyramidal decussation	0	0	0	0	0	0	0	0		1	0.17994	0.0899701	0.044985	0.017994	0.00899701	601
577			corticospinal tract, crossed	0	0	0	0	0	0	0	0		1	0.18024	0.0901198	0.0450599	0.018024	0.00901198	602
578			corticospinal tract, uncrossed	0	0	0	0	0	0	0	0		1	0.180539	0.0902695	0.0451347	0.0180539	0.00902695	603
581			internal medullary lamina of the thalamus	0.0102046	0.0131809	0.0119053	0.0132638	0.00850381	0.0127557	0.0165824	0.0115523		1	0.180838	0.0904192	0.0452096	0.0180838	0.00904192	604
582			middle thalamic commissure	0	0	0	0	0	0	0	0		1	0.181138	0.0905689	0.0452844	0.0181138	0.00905689	605
583			thalamic peduncles	0	0	0	0	0	0	0	0		1	0.181437	0.0907186	0.0453593	0.0181437	0.00907186	606
585			cerebral nuclei related	0	0	0	0	0	0	0	0		1	0.181737	0.0908683	0.0454341	0.0181737	0.00908683	607
586			pallidothalmic pathway	0	0	0	0	0	0	0	0		1	0.182036	0.091018	0.045509	0.0182036	0.0091018	608
587			nigrostriatal tract	0	0	0	0	0	0	0	0		1	0.182335	0.0911677	0.0455838	0.0182335	0.00911677	609
588			nigrothalamic fibers	0	0	0	0	0	0	0	0		1	0.182635	0.0913174	0.0456587	0.0182635	0.00913174	610
589			pallidotegmental fascicle	0	0	0	0	0	0	0	0		1	0.182934	0.0914671	0.0457335	0.0182934	0.00914671	611
590			striatonigral pathway	0	0	0	0	0	0	0	0		1	0.183234	0.0916168	0.0458084	0.0183234	0.00916168	612
591			subthalamic fascicle	0	0	0	0	0	0	0	0		1	0.183533	0.0917665	0.0458832	0.0183533	0.00917665	613
593			direct tectospinal pathway	0	0	0	0	0	0	0	0		1	0.183832	0.0919162	0.0459581	0.0183832	0.00919162	614
595			crossed tectospinal pathway	0	0	0	0	0	0	0	0		1	0.184132	0.0920659	0.0460329	0.0184132	0.00920659	615
598			rubroreticular tract	0	0	0	0	0	0	0	0		1	0.184431	0.0922156	0.0461078	0.0184431	0.00922156	616
599			central tegmental bundle	0	0	0	0	0	0	0	0		1	0.184731	0.0923653	0.0461826	0.0184731	0.00923653	617
600			retriculospinal tract	0	0	0	0	0	0	0	0		1	0.18503	0.092515	0.0462575	0.018503	0.0092515	618
601			retriculospinal tract, lateral part	0	0	0	0	0	0	0	0		1	0.185329	0.0926647	0.0463323	0.0185329	0.00926647	619
602			retriculospinal tract, medial part	0	0	0	0	0	0	0	0		1	0.185629	0.0928144	0.0464072	0.0185629	0.00928144	620
603			vestibulospinal pathway	0	0	0	0	0	0	0	0		1	0.185928	0.0929641	0.046482	0.0185928	0.00929641	621
604			medial forebrain bundle system	5.17031	5.54151	6.4225	5.46426	4.21194	5.9531	6.468	4.31929		1	0.186228	0.0931138	0.0465569	0.0186228	0.00931138	622
607			ansa peduncularis	0	0	0	0	0	0	0	0		1	0.186527	0.0932635	0.0466317	0.0186527	0.00932635	623
613			fimbria	1.24071	1.28578	1.30193	1.25921	1.06553	1.36019	1.67057	1.01019		1	0.186826	0.0934132	0.0467066	0.0186826	0.00934132	624
614			precommissural fornix, general	0	0	0	0	0	0	0	0		1	0.187126	0.0935629	0.0467814	0.0187126	0.00935629	625
615			precommissural fornix diagonal band	0	0	0	0	0	0	0	0		1	0.187425	0.0937126	0.0468563	0.0187425	0.00937126	626
616			postcommissural fornix	0.258941	0.253413	0.310389	0.264848	0.187084	0.310389	0.30061	0.221634		1	0.187725	0.0938623	0.0469311	0.0187725	0.00938623	627
617			medial corticohypothalmic tract	0	0	0	0	0	0	0	0		1	0.188024	0.094012	0.047006	0.0188024	0.0094012	628
618			columns of the fornix	0.258941	0.253413	0.310389	0.264848	0.187084	0.310389	0.30061	0.221634		1	0.188323	0.0941617	0.0470808	0.0188323	0.00941617	629
621			ventral hippocampal commissure	0.131809	0.143289	0.163273	0.12023	0.11055	0.198564	0.241083	0.103543		1	0.188623	0.0943114	0.0471557	0.0188623	0.00943114	630
622			perforant path	0	0	0	0	0	0	0	0		1	0.188922	0.0944611	0.0472305	0.0188922	0.00944611	631
623			angular path	0	0	0	0	0	0	0	0		1	0.189222	0.0946108	0.0473054	0.0189222	0.00946108	632
624			longitudinal association bundle	0	0	0	0	0	0	0	0		1	0.189521	0.0947605	0.0473802	0.0189521	0.00947605	633
625			stria terminalis	0.572306	0.583786	0.548071	0.634951	0.467284	0.593992	0.64714	0.494183		1	0.18982	0.0949102	0.0474551	0.018982	0.00949102	634
627			medial forebrain bundle	0	0	0	0	0	0	0	0		1	0.19012	0.0950599	0.0475299	0.019012	0.00950599	635
628			ventrolateral hypothalamic tract	0	0	0	0	0	0	0	0		1	0.190419	0.0952096	0.0476048	0.0190419	0.00952096	636
629			preoptic commissure	0	0	0	0	0	0	0	0		1	0.190719	0.0953593	0.0476796	0.0190719	0.00953593	637
630			supraoptic commissures	0	0	0	0	0	0	0	0		1	0.191018	0.095509	0.0477545	0.0191018	0.0095509	638
631			supraoptic commissures, anterior	0	0	0	0	0	0	0	0		1	0.191317	0.0956587	0.0478293	0.0191317	0.00956587	639
632			supraoptic commissures, dorsal	0	0	0	0	0	0	0	0		1	0.191617	0.0958084	0.0479042	0.0191617	0.00958084	640
633			supraoptic commissures, ventral	0	0	0	0	0	0	0	0		1	0.191916	0.0959581	0.047979	0.0191916	0.00959581	641
634			premammillary commissure	0	0	0	0	0	0	0	0		1	0.192216	0.0961078	0.0480539	0.0192216	0.00961078	642
636			propriohypothalamic pathways	0	0	0	0	0	0	0	0		1	0.192515	0.0962575	0.0481287	0.0192515	0.00962575	643
637			propriohypothalamic pathways, dorsal	0	0	0	0	0	0	0	0		1	0.192814	0.0964072	0.0482036	0.0192814	0.00964072	644
638			propriohypothalamic pathways, lateral	0	0	0	0	0	0	0	0		1	0.193114	0.0965569	0.0482784	0.0193114	0.00965569	645
639			propriohypothalamic pathways, medial	0	0	0	0	0	0	0	0		1	0.193413	0.0967066	0.0483533	0.0193413	0.00967066	646
640			propriohypothalamic pathways, ventral	0	0	0	0	0	0	0	0		1	0.193713	0.0968563	0.0484281	0.0193713	0.00968563	647
641			periventricular bundle of the hypothalamus	0	0	0	0	0	0	0	0		1	0.194012	0.097006	0.048503	0.0194012	0.0097006	648
643			principal mammillary tract	0.008929	0.0123305	0.0208343	0.0192539	0.008929	0.0136061	0.0157321	0.0175424		1	0.194311	0.0971557	0.0485778	0.0194311	0.00971557	649
647			dorsal thalamus related	0	0	0	0	0	0	0	0		1	0.194611	0.0973054	0.0486527	0.0194611	0.00973054	650
648			periventricular bundle of the thalamus	0	0	0	0	0	0	0	0		1	0.19491	0.0974551	0.0487275	0.019491	0.00974551	651
650			stria medullaris	0.316342	0.321444	0.331223	0.313197	0.24491	0.339728	0.488544	0.241743		1	0.19521	0.0976048	0.0488024	0.019521	0.00976048	652
653			pineal stalk	0	0	0	0	0	0	0	0		1	0.195509	0.0977545	0.0488772	0.0195509	0.00977545	653
654			midbrain related	0	0	0	0	0	0	0	0		1	0.195808	0.0979042	0.0489521	0.0195808	0.00979042	654
655			dorsal longitudinal fascicle	0	0	0	0	0	0	0	0		1	0.196108	0.0980539	0.0490269	0.0196108	0.00980539	655
656			dorsal tegmental tract	0	0	0	0	0	0	0	0		1	0.196407	0.0982036	0.0491018	0.0196407	0.00982036	656
657	VS		ventricular systems	0	0	0	0	0	0	0	0		1	0.196707	0.0983533	0.0491766	0.0196707	0.00983533	657
658			lateral ventricle	0	0	0	0	0	0	0	0		1	0.197006	0.098503	0.0492515	0.0197006	0.0098503	658
659			rhinocele	0	0	0	0	0	0	0	0		1	0.197305	0.0986527	0.0493263	0.0197305	0.00986527	659
660			subependymal zone	0	0	0	0	0	0	0	0		1	0.197605	0.0988024	0.0494012	0.0197605	0.00988024	660
661			choroid plexus	0	0	0	0	0	0	0	0		1	0.197904	0.0989521	0.049476	0.0197904	0.00989521	661
662			choroid fissure	0	0	0	0	0	0	0	0		1	0.198204	0.0991018	0.0495509	0.0198204	0.00991018	662
663			interventricular foramen	0	0	0	0	0	0	0	0		1	0.198503	0.0992515	0.0496257	0.0198503	0.00992515	663
664			third ventricle	0	0	0	0	0	0	0	0		1	0.198802	0.0994012	0.0497006	0.0198802	0.00994012	664
665			cerebral aqueduct	0	0	0	0	0	0	0	0		1	0.199102	0.0995509	0.0497754	0.0199102	0.00995509	665
666			fourth ventricle	0	0	0	0	0	0	0	0		1	0.199401	0.0997006	0.0498503	0.0199401	0.00997006	666
667			lateral recess	0	0	0	0	0	0	0	0		1	0.199701	0.0998503	0.0499251	0.0199701	0.00998503	667
668			central canal, spinal cord/medulla	0	0	0	0	0	0	0	0		1	0.2	0.1	0.05	0.02	0.01	668

## Sheet: SPSS
No	Category	1	2	3	4	5	6	7	8	9	10	11	12	13	14	15	16	17	18	19	20	21	22	23	24	25	26	27	28	29	30	31	32	33	34	35	36	37	38	39	40	41	42	43	44	45	46	47	48
WT 1	WT	19.0149	0	0	0	0	0	10.2207	1.47669	3.52398	3.19786	1.77687	0.245335	8.79421	1.779	2.94444	2.74375	1.23305	0.0939671	31.7077	0	0	0	0	0	0	26.6594	0	0	0	0	0	0	1.23475	0.137336	0.329523	0.140313	0.32357	0.251287	0.0527236	8.78188	0.849955	2.51415	1.25686	2.11405	1.71522	0.331648	2.81178	0.305287
WT 2	WT	21.0223	0	0	0	0	0	11.1642	1.64123	3.86626	3.49166	1.92781	0.237256	9.85804	1.97458	3.28885	3.15151	1.35806	0.0850381	33.6266	0	0	0	0	0	0	28.2195	0	0	0	0	0	0	1.34063	0.158596	0.378419	0.154344	0.343979	0.251713	0.053574	9.24917	0.936694	2.65957	1.34955	2.26584	1.72585	0.311665	3.00865	0.335475
WT 3	WT	20.3875	0	0	0	0	0	10.9129	1.64761	3.78335	3.42576	1.83937	0.216847	9.47452	1.87254	3.16894	3.04777	1.30023	0.0850381	32.5666	0	0	0	0	0	0	27.3636	0	0	0	0	0	0	1.30108	0.14499	0.354184	0.154769	0.335475	0.254264	0.0574007	8.95664	0.767469	2.68593	1.32107	2.22332	1.65867	0.300184	2.90405	0.314641
WT 4	WT	19.4529	0	0	0	0	0	10.457	1.60663	3.71943	3.21455	1.66268	0.253724	8.99586	1.86121	3.04084	2.84445	1.17107	0.0782993	32.344	0	0	0	0	0	0	26.8729	0	0	0	0	0	0	1.28958	0.141623	0.362401	0.156171	0.33459	0.243883	0.0509159	9.06646	0.893382	2.65191	1.30114	2.16157	1.72986	0.3286	2.77855	0.329884
Hemi 1	Hemi	15.5837	0	0	0	0	0	8.23934	1.24708	2.88747	2.56645	1.36784	0.170501	7.34431	1.46521	2.44484	2.35215	1.00813	0.0739831	24.9021	0	0	0	0	0	0	20.8471	0	0	0	0	0	0	1.00728	0.110975	0.284027	0.119479	0.252138	0.196013	0.044645	6.93698	0.690084	2.07493	1.0009	1.67568	1.27302	0.222375	2.20376	0.250862
Hemi 2	Hemi	14.4846	0	0	0	0	0	7.70999	1.21137	2.72165	2.35003	1.26282	0.164124	6.77457	1.36444	2.23778	2.16975	0.943073	0.0595267	24.1798	0	0	0	0	0	0	20.2867	0	0	0	0	0	0	0.919263	0.109699	0.258091	0.1114	0.232579	0.168801	0.0386924	6.79327	0.686258	2.0137	0.964758	1.63443	1.26707	0.227052	2.14636	0.246186
Hemi 3	Hemi	13.7413	0	0	0	0	0	7.30307	1.09104	2.53371	2.29645	1.23093	0.150943	6.43824	1.23433	2.12425	2.11107	0.910333	0.0582511	21.2676	0	0	0	0	0	0	17.8712	0	0	0	0	0	0	0.874192	0.0977938	0.236406	0.104172	0.225776	0.172202	0.037842	5.77791	0.554874	1.67865	0.845704	1.40653	1.09402	0.198139	1.90655	0.223225
Hemi 4	Hemi	15.8956	0	0	0	0	0	8.3579	1.22241	2.9681	2.63821	1.35847	0.170718	7.53769	1.51892	2.47434	2.46878	1.01703	0.0586174	25.0288	0	0	0	0	0	0	20.742	0	0	0	0	0	0	1.04099	0.118946	0.26656	0.131782	0.278968	0.202808	0.0419307	6.81117	0.667896	1.98358	0.990506	1.68022	1.26605	0.222917	2.12863	0.230191
[truncated: 620 more columns]

## Sheet: komaki
			volume [mm^3 x 10^3]	wt				hemi					mean		SD
Label Id	Label Name		ID	01	11	19	23	02	12	20	24		wt	hemi	wt	hemi		f-test	t-test	補正p
Both	FRP			783.36	1117.18	1061.89	910.336	768	826.368	703.488	643.584		968.192	735.36	151.094	79.1338		0.316274	0.0341781	1.05952
	MO			18146.3	21122.5	21164.6	20619.3	16531.5	15936	14577.7	16090.1		20263.2	15783.8	1432.82	842.762		0.406589	0.00168068	0.0504203
	SS			27015.7	29610	28938.3	30695.4	22321.1	21926.9	20478	23950.3		29064.8	22169.1	1546.06	1427.62		0.898838	0.000604018	0.0181205
	GU			1358.34	1541.12	1458.69	1587.71	1181.7	1154.05	1071.1	1242.62		1486.46	1162.37	100.709	71.2108		0.583568	0.00191012	0.0573037
	VISC			1880.06	2023.43	1943.55	2066.94	1590.78	1550.85	1461.76	1575.94		1978.49	1544.83	83.169	57.7818		0.56494	0.000139123	0.00417369
	AUD			4389.37	4941.83	4803.07	5068.8	3447.81	3324.42	3240.96	4034.05		4800.77	3511.81	294.954	358.378		0.756618	0.00184064	0.0552192
	VIS			10076.7	11292.7	11644.9	11316.7	8740.86	8093.7	8169.47	8407.04		11082.8	8352.77	689.701	291.133		0.190368	0.000338653	0.0101596
	ACA			4023.81	5167.62	4731.91	5019.13	3688.96	3489.8	3339.78	3779.07		4735.62	3574.4	507.835	197.668		0.155484	0.00531106	0.159332
	PL			1601.02	2466.82	2185.21	2349.57	1844.74	1716.74	1611.78	1688.06		2150.66	1715.33	384.194	96.979		0.0488717	0.105348	3.16045
	ILA			375.296	598.528	464.896	585.728	371.2	403.968	357.888	474.624		506.112	401.92	105.973	52.1939		0.275063	0.128178	3.84534
	ORB			3967.48	5619.2	5438.97	5575.68	3970.56	4221.96	3778.56	4666.88		5150.33	4159.49	792.298	383.905		0.264864	0.065363	1.96089
	AI			5557.25	6390.79	6422.02	6792.19	5027.84	4877.82	4574.72	5439.49		6290.56	4979.97	521.761	359.682		0.556811	0.00610469	0.183141
	RSP			8216.58	8767.49	8640.51	8406.02	7375.36	6618.11	6322.17	6304.25		8507.65	6654.97	245.098	501.358		0.270374	0.000563271	0.0168981
	PTLp			1891.33	2099.71	2080.25	2189.83	1522.69	1521.66	1491.97	1516.54		2065.28	1513.22	125.408	14.4181		0.00503919	0.00284205	0.0852616
	TEa			2286.59	2556.41	2473.47	2574.34	1868.8	1816.58	1684.99	1996.29		2472.7	1841.66	131.625	128.869		0.973062	0.000475665	0.0142699
	PERI			314.368	337.408	333.824	344.576	274.944	269.824	257.536	185.344		332.544	246.912	12.9155	41.6903		0.0856365	0.007766	0.23298
	ECT			1368.06	1479.17	1416.19	1499.65	1108.48	1108.99	1040.9	1094.66		1440.77	1088.26	60.0868	32.2641		0.334277	4.79194e-05	0.00143758
	OLF			29764.6	32786.4	31816.7	39409.2	26137	26468.4	24098.8	32196.1		33444.2	27225.1	4171.42	3475.68		0.771477	0.0618752	1.85626
	HPF			37004.8	38029.8	38331.4	44440.5	26748.9	30382.6	27221	35147.8		39451.6	29875.1	3374.03	3867.66		0.827756	0.00971707	0.291512
	CTXsp			5474.3	6159.36	5797.89	6359.55	4475.39	4509.7	4345.34	4704.25		5947.77	4508.67	391.991	148.365		0.144808	0.0004698	0.014094
	STR			31103	32612.3	32114.7	35862	23916	24659.5	22709.2	28825.6		32923	25027.6	2057.51	2656.5		0.684921	0.00332785	0.0998356
	PAL			5659.14	6564.87	6518.27	7259.65	4695.55	4815.88	4492.29	5834.24		6500.48	4959.49	655.402	598.262		0.884336	0.013254	0.39762
	TH			16051.2	18372.6	17518.1	19762.2	13808.1	13524	12384.3	15194.1		17926	13727.6	1554.81	1155.16		0.637619	0.00490173	0.147052
	HY			8971.78	10125.3	10219.5	12302.3	7421.44	7437.82	7278.08	9805.82		10404.7	7985.79	1386.44	1215.47		0.833872	0.0393813	1.18144
	MB			26481.1	28651.1	28427.7	36339.7	23468.1	22286.3	21534.2	29019.1		29974.9	24076.9	4353.68	3389.57		0.690937	0.0763732	2.2912
	HB			27001.3	31944.7	30219.8	43267.1	22396.4	22311.9	22142	35877.4		33108.2	25681.9	7075.64	6797.81		0.949037	0.180865	5.42595
	CBX			41078.3	47543.3	46825.5	51433.5	37098	38726.1	34846.7	41084.9		46720.2	37938.9	4271.41	2632.22		0.447545	0.0128207	0.384621
	CBN			1509.89	1696.77	1638.4	2311.17	1280.51	1341.95	1190.4	1958.91		1789.06	1442.94	356.722	349.564		0.974196	0.215064	6.45193
	fiber tracts			24544.7	24538.1	23510	29946.4	18841.6	19052	16781.8	23083		25634.8	19439.6	2915.23	2636.03		0.872462	0.0197513	0.592538
	VS			3737.09	3641.86	3678.21	4353.02	3047.94	2992.64	2576.38	3065.34		3852.55	2920.57	335.949	231.547		0.556618	0.00381726	0.114518

## Sheet: shiohama
region	WT 1	WT 2	WT 3	WT 4	hemi 1	hemi 2	hemi 3	hemi 4		SD (WT)	SD (Mecp2-KO)	SEM (WT)	SEM (Mecp2-KO)		WT average	MeCP2KO average	T.TEST
root	297.763	328.932	294.285	344.823	250.38	229.105	218.471	274.591		24.504	24.8137	12.252	12.4068		316.451	243.137	0.00565723
Basic cell groups and regions	316.619	348.691	313.509	364.876	265.476	243.677	231.953	290.261		25.0086	25.6914	12.5043	12.8457		335.924	257.842	0.00479337
Cerebrum	199.713	217.859	204.5	227.182	166.085	154.811	144.89	181.886		12.5382	15.8803	6.26912	7.94014		212.313	161.918	0.00249824
Cerebral cortex	160.46	177.692	164.888	183.682	135.351	124.877	118.723	147.727		10.8351	12.7166	5.41757	6.35829		171.681	131.669	0.00303198
Cortical plate	153.697	170.634	158.008	175.932	129.877	119.454	113.771	141.538		10.4426	12.2303	5.22131	6.11515		164.567	126.16	0.00307395
Isocortex	98.1799	106.898	104.624	103.437	80.1594	76.9485	69.7291	83.2162		3.69388	5.78612	1.84694	2.89306		103.285	77.5133	0.000288782
Frontal pole, cerebral cortex	0.412435	0.489819	0.431994	0.497607	0.360987	0.213871	0.348231	0.404332		0.0421651	0.0822394	0.0210826	0.0411197		0.457964	0.331855	0.0342283
Frontal pole, layer 1	0.344404	0.41371	0.354609	0.418024	0.300184	0.176454	0.291256	0.341864		0.0385793	0.0708442	0.0192897	0.0354221		0.382687	0.277439	0.0401523
Frontal pole, layer 2/3	0.0680305	0.0761091	0.0773847	0.0795829	0.0608022	0.0374168	0.0569755	0.0624682		0.00503943	0.0115635	0.00251971	0.00578177		0.0752768	0.0544157	0.0162527
Somatomotor areas	19.0149	21.0223	20.3875	19.4529	15.5837	14.4846	13.7413	15.8956		0.90574	0.995152	0.45287	0.497576		19.9694	14.9263	0.000291506
Somatomotor areas, Layer 1	0	0	0	0	0	0	0	0		0	0	0	0		0	0	#DIV/0!
Somatomotor areas, Layer 2/3	0	0	0	0	0	0	0	0		0	0	0	0		0	0	#DIV/0!
Somatomotor areas, Layer 5	0	0	0	0	0	0	0	0		0	0	0	0		0	0	#DIV/0!
Somatomotor areas, Layer 6a	0	0	0	0	0	0	0	0		0	0	0	0		0	0	#DIV/0!
Somatomotor areas, Layer 6b	0	0	0	0	0	0	0	0		0	0	0	0		0	0	#DIV/0!
Primary motor area	10.2207	11.1642	10.9129	10.457	8.23934	7.70999	7.30307	8.3579		0.427818	0.488954	0.213909	0.244477		10.6887	7.90258	0.000138
Primary motor area, Layer 1	1.47669	1.64123	1.64761	1.60663	1.24708	1.21137	1.09104	1.22241		0.0796324	0.0695781	0.0398162	0.0347891		1.59304	1.19297	0.000276807
Primary motor area, Layer 2/3	3.52398	3.86626	3.78335	3.71943	2.88747	2.72165	2.53371	2.9681		0.145815	0.19233	0.0729077	0.0961649		3.72325	2.77773	0.000228355
Primary motor area, Layer 5	3.19786	3.49166	3.42576	3.21455	2.56645	2.35003	2.29645	2.63821		0.148405	0.165228	0.0742024	0.0826138		3.33246	2.46279	0.000228902
Primary motor area, Layer 6a	1.77687	1.92781	1.83937	1.66268	1.36784	1.26282	1.23093	1.35847		0.111454	0.0684928	0.0557272	0.0342464		1.80169	1.30501	0.000271463
Primary motor area, Layer 6b	0.245335	0.237256	0.216847	0.253724	0.170501	0.164124	0.150943	0.170718		0.0157976	0.00927159	0.00789882	0.00463579		0.238291	0.164071	0.000189423
Secondary motor area	8.79421	9.85804	9.47452	8.99586	7.34431	6.77457	6.43824	7.53769		0.479129	0.507219	0.239564	0.253609		9.28066	7.0237	0.000647353
Secondary motor area, layer 1	1.779	1.97458	1.87254	1.86121	1.46521	1.36444	1.23433	1.51892		0.0801868	0.125209	0.0400934	0.0626047		1.87183	1.39572	0.000683234
Secondary motor area, layer 2/3	2.94444	3.28885	3.16894	3.04084	2.44484	2.23778	2.12425	2.47434		0.150168	0.167813	0.0750841	0.0839067		3.11077	2.3203	0.000416872
Secondary motor area, layer 5	2.74375	3.15151	3.04777	2.84445	2.35215	2.16975	2.11107	2.46878		0.186015	0.164775	0.0930077	0.0823873		2.94687	2.27544	0.00165782
Secondary motor area, layer 6a	1.23305	1.35806	1.30023	1.17107	1.00813	0.943073	0.910333	1.01703		0.0811254	0.0514797	0.0405627	0.0257398		1.2656	0.969642	0.000839275
Secondary motor area, layer 6b	0.0939671	0.0850381	0.0850381	0.0782993	0.0739831	0.0595267	0.0582511	0.0586174		0.00642753	0.00761127	0.00321376	0.00380564		0.0855856	0.0625946	0.00363179
Somatosensory areas	31.7077	33.6266	32.5666	32.344	24.9021	24.1798	21.2676	25.0288		0.798065	1.75821	0.399032	0.879104		32.5612	23.8446	0.000103391
Somatosensory areas, layer 1	0	0	0	0	0	0	0	0		0	0	0	0		0	0	#DIV/0!
Somatosensory areas, layer 2/3	0	0	0	0	0	0	0	0		0	0	0	0		0	0	#DIV/0!
Somatosensory areas, layer 4	0	0	0	0	0	0	0	0		0	0	0	0		0	0	#DIV/0!
Somatosensory areas, layer 5	0	0	0	0	0	0	0	0		0	0	0	0		0	0	#DIV/0!
Somatosensory areas, layer 6a	0	0	0	0	0	0	0	0		0	0	0	0		0	0	#DIV/0!
Somatosensory areas, layer 6b	0	0	0	0	0	0	0	0		0	0	0	0		0	0	#DIV/0!
Primary somatosensory area	26.6594	28.2195	27.3636	26.8729	20.8471	20.2867	17.8712	20.742		0.692915	1.39835	0.346457	0.699177		27.2788	19.9367	8.18778e-05
Primary somatosensory area, layer 1	0	0	0	0	0	0	0	0		0	0	0	0		0	0	#DIV/0!
Primary somatosensory area, layer 2/3	0	0	0	0	0	0	0	0		0	0	0	0		0	0	#DIV/0!
Primary somatosensory area, layer 4	0	0	0	0	0	0	0	0		0	0	0	0		0	0	#DIV/0!
Primary somatosensory area, layer 5	0	0	0	0	0	0	0	0		0	0	0	0		0	0	#DIV/0!
Primary somatosensory area, layer 6a	0	0	0	0	0	0	0	0		0	0	0	0		0	0	#DIV/0!
Primary somatosensory area, layer 6b	0	0	0	0	0	0	0	0		0	0	0	0		0	0	#DIV/0!
Primary somatosensory area, nose	1.23475	1.34063	1.30108	1.28958	1.00728	0.919263	0.874192	1.04099		0.0436999	0.0770647	0.02185	0.0385323		1.29151	0.960431	0.000296112
Primary somatosensory area, nose, layer 1	0.137336	0.158596	0.14499	0.141623	0.110975	0.109699	0.0977938	0.118946		0.00918991	0.00872536	0.00459496	0.00436268		0.145636	0.109354	0.00123046
Primary somatosensory area, nose, layer 2/3	0.329523	0.378419	0.354184	0.362401	0.284027	0.258091	0.236406	0.26656		0.0203952	0.0197838	0.0101976	0.0098919		0.356132	0.261271	0.000546558
Primary somatosensory area, nose, layer 4	0.140313	0.154344	0.154769	0.156171	0.119479	0.1114	0.104172	0.131782		0.00743203	0.0118356	0.00371601	0.00591778		0.151399	0.116708	0.00254066
Primary somatosensory area, nose, layer 5	0.32357	0.343979	0.335475	0.33459	0.252138	0.232579	0.225776	0.278968		0.00837143	0.0238481	0.00418571	0.011924		0.334404	0.247365	0.000462375
Primary somatosensory area, nose, layer 6a	0.251287	0.251713	0.254264	0.243883	0.196013	0.168801	0.172202	0.202808		0.00446697	0.0169763	0.00223349	0.00848816		0.250287	0.184956	0.000302916
Primary somatosensory area, nose, layer 6b	0.0527236	0.053574	0.0574007	0.0509159	0.044645	0.0386924	0.037842	0.0419307		0.00273295	0.00312264	0.00136648	0.00156132		0.0536536	0.0407775	0.000807519
Primary somatosensory area, barrel field	8.78188	9.24917	8.95664	9.06646	6.93698	6.79327	5.77791	6.81117		0.195979	0.538425	0.0979896	0.269212		9.01354	6.57984	0.000145622
Primary somatosensory area, barrel field, layer 1	0.849955	0.936694	0.767469	0.893382	0.690084	0.686258	0.554874	0.667896		0.0722155	0.0640065	0.0361077	0.0320032		0.861875	0.649778	0.00458875
Primary somatosensory area, barrel field, layer 2/3	2.51415	2.65957	2.68593	2.65191	2.07493	2.0137	1.67865	1.98358		0.0772124	0.176842	0.0386062	0.0884209		2.62789	1.93772	0.000376403
Primary somatosensory area, barrel field, layer 4	1.25686	1.34955	1.32107	1.30114	1.0009	0.964758	0.845704	0.990506		0.0389734	0.0714748	0.0194867	0.0357374		1.30716	0.950467	0.000122349
Primary somatosensory area, barrel field, layer 5	2.11405	2.26584	2.22332	2.16157	1.67568	1.63443	1.40653	1.68022		0.0669161	0.130098	0.033458	0.0650489		2.19119	1.59922	0.000190845
Primary somatosensory area, barrel field, layer 6a	1.71522	1.72585	1.65867	1.72986	1.27302	1.26707	1.09402	1.26605		0.0330685	0.087403	0.0165342	0.0437015		1.7074	1.22504	4.82925e-05
Primary somatosensory area, barrel field, layer 6b	0.331648	0.311665	0.300184	0.3286	0.222375	0.227052	0.198139	0.222917		0.0147893	0.0131548	0.00739466	0.0065774		0.318024	0.217621	5.33444e-05
Primary somatosensory area, lower limb	2.81178	3.00865	2.90405	2.77855	2.20376	2.14636	1.90655	2.12863		0.103282	0.130515	0.0516409	0.0652576		2.87576	2.09633	8.40369e-05
Primary somatosensory area, lower limb, layer 1	0.305287	0.335475	0.314641	0.329884	0.250862	0.246186	0.223225	0.230191		0.013849	0.0130529	0.00692451	0.00652643		0.321322	0.237616	0.00011971
Primary somatosensory area, lower limb, layer 2/3	0.734729	0.812114	0.796807	0.769729	0.604196	0.591015	0.528087	0.593876		0.0339498	0.0346039	0.0169749	0.017302		0.778345	0.579293	0.000175906
Primary somatosensory area, lower limb, layer 4	0.274248	0.298909	0.28998	0.274689	0.220674	0.21132	0.198989	0.222917		0.0120968	0.0108852	0.00604839	0.00544261		0.284456	0.213475	0.000125463
Primary somatosensory area, lower limb, layer 5	0.798082	0.866538	0.848255	0.778714	0.628857	0.62418	0.544244	0.619975		0.0412936	0.0402107	0.0206468	0.0201054		0.822897	0.604314	0.000273153
Primary somatosensory area, lower limb, layer 6a	0.58081	0.578259	0.553173	0.522423	0.419238	0.394152	0.343979	0.384222		0.0271905	0.0312978	0.0135953	0.0156489		0.558666	0.385398	0.000159411
Primary somatosensory area, lower limb, layer 6b	0.118628	0.117353	0.101195	0.103115	0.0799358	0.0795107	0.0680305	0.0774435		0.00919062	0.00557376	0.00459531	0.00278688		0.110073	0.0762301	0.000747388
Primary somatosensory area, mouth	2.70974	2.78415	2.77607	2.6549	2.05835	1.91123	1.79643	2.19965		0.0608241	0.175395	0.030412	0.0876975		2.73121	1.99142	0.000207727
Primary somatosensory area, mouth, layer 1	0.316342	0.350782	0.321019	0.32261	0.247886	0.241508	0.216847	0.250301		0.0156241	0.0153148	0.00781206	0.00765742		0.327688	0.239136	0.000190548
Primary somatosensory area, mouth, layer 2/3	0.734729	0.789153	0.761941	0.746196	0.58081	0.535741	0.504701	0.615269		0.0235722	0.0487551	0.0117861	0.0243775		0.758005	0.55913	0.000325882
Primary somatosensory area, mouth, layer 4	0.293381	0.301035	0.303586	0.296938	0.222375	0.215572	0.194737	0.239604		0.00449858	0.0185553	0.00224929	0.00927767		0.298735	0.218072	0.000150042
Primary somatosensory area, mouth, layer 5	0.779374	0.786602	0.785752	0.736355	0.580385	0.541268	0.507678	0.633667		0.0239949	0.0541563	0.0119974	0.0270781		0.772021	0.565749	0.000435273
Primary somatosensory area, mouth, layer 6a	0.492796	0.46856	0.511079	0.464233	0.359711	0.318893	0.318043	0.389357		0.0219062	0.03456	0.0109531	0.01728		0.484167	0.346501	0.00052427
Primary somatosensory area, mouth, layer 6b	0.0931167	0.0880144	0.0926915	0.088568	0.0671801	0.0582512	0.0544244	0.0714533		0.00267846	0.00785081	0.00133923	0.0039254		0.0905977	0.0628272	0.000538455
Primary somatosensory area, upper limb	4.81656	4.99811	4.88246	4.63592	3.62815	3.61965	3.19573	3.61631		0.151461	0.212877	0.0757306	0.106439		4.83326	3.51496	5.49763e-05
Primary somatosensory area, upper limb, layer 1	0.508102	0.559551	0.495347	0.548523	0.40138	0.413286	0.352908	0.362829		0.0309769	0.0292505	0.0154884	0.0146253		0.527881	0.382601	0.000487637
Primary somatosensory area, upper limb, layer 2/3	1.37464	1.45968	1.42736	1.36232	1.0668	1.09572	0.942647	1.07865		0.0455671	0.0698857	0.0227835	0.0349429		1.406	1.04595	0.000133189
Primary somatosensory area, upper limb, layer 4	0.557425	0.583786	0.555724	0.531408	0.42434	0.425616	0.368215	0.427437		0.0214028	0.0288193	0.0107014	0.0144096		0.557086	0.411402	0.000187743
Primary somatosensory area, upper limb, layer 5	1.34233	1.38995	1.39335	1.25407	1.01663	0.978789	0.896302	1.04271		0.0648922	0.0638451	0.0324461	0.0319226		1.34492	0.983607	0.000212427
Primary somatosensory area, upper limb, layer 6a	0.862286	0.852082	0.856334	0.781709	0.602495	0.597393	0.538291	0.600722		0.0378279	0.0310281	0.018914	0.0155141		0.838103	0.584725	4.73853e-05
Primary somatosensory area, upper limb, layer 6b	0.171777	0.153069	0.154344	0.157882	0.116502	0.108849	0.0973686	0.103971		0.0085843	0.00806678	0.00429215	0.00403339		0.159268	0.106673	0.000110024
Primary somatosensory area, trunk	3.76591	4.15879	3.88326	3.87517	3.07158	3.02778	2.57538	2.90178		0.167451	0.224359	0.0837255	0.11218		3.92078	2.89413	0.000328417
Primary somatosensory area, trunk, layer 1	0.408608	0.440922	0.389049	0.415457	0.3359	0.338877	0.275949	0.326033		0.0214289	0.0293454	0.0107144	0.0146727		0.413509	0.31919	0.00203166
Primary somatosensory area, trunk, layer 2/3	1.10252	1.25474	1.17438	1.22327	0.931167	0.907357	0.799358	0.880117		0.0663025	0.0573544	0.0331512	0.0286772		1.18872	0.8795	0.000406021
Primary somatosensory area, trunk, layer 4	0.435395	0.484292	0.458355	0.45696	0.358436	0.352483	0.314641	0.351277		0.0200101	0.0199589	0.010005	0.00997946		0.45875	0.344209	0.000189175
Primary somatosensory area, trunk, layer 5	0.988993	1.09657	1.04214	0.955422	0.787878	0.778099	0.660321	0.748335		0.0618653	0.0580475	0.0309326	0.0290238		1.02078	0.743658	0.000614219
Primary somatosensory area, trunk, layer 6a	0.678179	0.713895	0.676053	0.669181	0.538716	0.532339	0.428167	0.485626		0.0200825	0.0511663	0.0100413	0.0255831		0.684327	0.496212	0.000478168
Primary somatosensory area, trunk, layer 6b	0.152218	0.168375	0.143289	0.154887	0.119479	0.118628	0.0969434	0.110389		0.010383	0.0104486	0.00519148	0.00522428		0.154692	0.11136	0.00106877
Primary somatosensory area, unassigned	2.53881	2.67998	2.65999	2.57232	1.94099	1.86914	1.74498	2.04348		0.0679515	0.125498	0.0339757	0.0627492		2.61278	1.89965	5.81254e-05
Primary somatosensory area, unassigned, layer 1	0.287003	0.304436	0.31294	0.30464	0.223225	0.226202	0.207918	0.22634		0.0109122	0.008787	0.00545609	0.0043935		0.302255	0.220921	2.45757e-05
Primary somatosensory area, unassigned, layer 2/3	0.711343	0.760666	0.753012	0.737211	0.565078	0.542544	0.475788	0.562214		0.0217878	0.0416346	0.0108939	0.0208173		0.740558	0.536406	0.000128298
Primary somatosensory area, unassigned, layer 4	0.222375	0.244484	0.236831	0.221206	0.176879	0.170927	0.156895	0.189116		0.0113424	0.0133867	0.00567121	0.00669334		0.231224	0.173454	0.000588803
Primary somatosensory area, unassigned, layer 5	0.811263	0.857609	0.84868	0.802246	0.596117	0.571031	0.553173	0.673031		0.0272796	0.0528188	0.0136398	0.0264094		0.82995	0.598338	0.000235397
Primary somatosensory area, unassigned, layer 6a	0.447725	0.451127	0.447726	0.447119	0.333349	0.313791	0.309114	0.351277		0.00182444	0.0193565	0.000912222	0.00967824		0.448424	0.326883	1.60066e-05
Primary somatosensory area, unassigned, layer 6b	0.0591015	0.0616526	0.0608022	0.0599011	0.0463458	0.044645	0.0420939	0.0415028		0.00110467	0.00225751	0.000552334	0.00112875		0.0603643	0.0436469	1.11566e-05
Supplemental somatosensory area	5.04828	5.40715	5.20306	5.47111	4.05504	3.89305	3.39642	4.28677		0.193457	0.377282	0.0967287	0.188641		5.2824	3.90782	0.000639589
Supplemental somatosensory area, layer 1	0.58081	0.644163	0.596117	0.599866	0.484292	0.437947	0.403506	0.488193		0.0272272	0.040386	0.0136136	0.020193		0.605239	0.453484	0.000790137
Supplemental somatosensory area, layer 2/3	1.23008	1.29683	1.2896	1.33922	1.02981	0.989844	0.82572	1.04271		0.0449276	0.100096	0.0224638	0.050048		1.28893	0.97202	0.00117557
Supplemental somatosensory area, layer 4	0.615676	0.683706	0.60292	0.646076	0.49237	0.481741	0.402655	0.53098		0.0359628	0.0538505	0.0179814	0.0269253		0.637094	0.476937	0.0025868
Supplemental somatosensory area, layer 5	1.23603	1.32447	1.28875	1.34949	0.988142	0.960931	0.841452	1.07094		0.0492138	0.0949384	0.0246069	0.0474692		1.29968	0.965368	0.000776003
Supplemental somatosensory area, layer 6a	1.11102	1.15482	1.1225	1.22284	0.845279	0.812115	0.730052	0.914774		0.0502415	0.0767039	0.0251207	0.038352		1.15279	0.825555	0.000380936
Supplemental somatosensory area, layer 6b	0.274673	0.303161	0.303161	0.313625	0.215146	0.210469	0.193037	0.239176		0.0167316	0.0190285	0.00836581	0.00951425		0.298655	0.214457	0.000560456
Gustatory areas	1.9546	2.0154	2.00817	2.08327	1.55492	1.42141	1.31256	1.68407		0.0527753	0.161271	0.0263876	0.0806357		2.01536	1.49324	0.000844154
Gustatory areas, layer 1	0.332074	0.354184	0.348656	0.353844	0.26872	0.235131	0.218123	0.268699		0.0103898	0.0252693	0.00519489	0.0126346		0.347189	0.247668	0.000340736
Gustatory areas, layer 2/3	0.473237	0.486418	0.485568	0.495467	0.372892	0.337176	0.312515	0.403476		0.00913149	0.0399313	0.00456575	0.0199657		0.485172	0.356515	0.000757103
Gustatory areas, layer 4	0.128407	0.133935	0.137337	0.142051	0.104172	0.0956679	0.0926915	0.116379		0.00574528	0.0106146	0.00287264	0.00530731		0.135433	0.102228	0.00151178
Gustatory areas, layer 5	0.520858	0.527236	0.531488	0.562214	0.414561	0.382247	0.343979	0.450541		0.0183704	0.0454648	0.00918521	0.0227324		0.535449	0.397832	0.00136456
Gustatory areas, layer 6a	0.420513	0.43582	0.432419	0.446691	0.337176	0.311665	0.290405	0.379944		0.0107809	0.0385124	0.00539047	0.0192562		0.433861	0.329797	0.00200687
Gustatory areas, layer 6b	0.0795106	0.0778098	0.0727076	0.0830058	0.0574007	0.0595267	0.0548496	0.0650354		0.00428635	0.0043329	0.00214317	0.00216645		0.0782584	0.0592031	0.000775787
Visceral area	1.55875	1.61402	1.55662	1.62161	1.25644	1.14036	1.03832	1.31183		0.0348647	0.122047	0.0174324	0.0610236		1.58775	1.18674	0.00073393
Visceral area, layer 1	0.267445	0.283602	0.274248	0.272978	0.224926	0.194312	0.186659	0.22035		0.00670784	0.0189168	0.00335392	0.00945842		0.274568	0.206562	0.000504684
Visceral area, layer 2/3	0.371616	0.384372	0.366939	0.375237	0.295933	0.280201	0.240658	0.312769		0.00738182	0.0308363	0.00369091	0.0154182		0.374541	0.28239	0.00113854
Visceral area, layer 4	0.15647	0.171777	0.161572	0.168579	0.12373	0.123731	0.104597	0.139912		0.00689447	0.0144424	0.00344723	0.00722118		0.1646	0.122992	0.00201538
Visceral area, layer 5	0.379695	0.385222	0.372892	0.393208	0.301035	0.269996	0.250437	0.319187		0.00860213	0.0307974	0.00430106	0.0153987		0.382754	0.285164	0.000881242
Visceral area, layer 6a	0.323995	0.32442	0.321444	0.34871	0.261492	0.228328	0.215572	0.265276		0.0127795	0.0245311	0.00638973	0.0122656		0.329642	0.242667	0.000752608
Visceral area, layer 6b	0.0595266	0.0646289	0.0595267	0.0628961	0.0493221	0.0437947	0.0403931	0.0543388		0.00254584	0.00614191	0.00127292	0.00307096		0.0616446	0.0469622	0.00448698
Auditory areas	6.0883	6.48373	6.44801	6.67041	4.8089	4.77447	4.05164	5.23321		0.243276	0.490212	0.121638	0.245106		6.42261	4.71706	0.00078897
Dorsal auditory area	1.95077	2.10809	2.09917	2.10895	1.56257	1.54387	1.31171	1.64899		0.0774406	0.144179	0.0387203	0.0720895		2.06674	1.51679	0.000527703
Dorsal auditory area, layer 1	0.242358	0.257665	0.261067	0.253296	0.196438	0.20154	0.170076	0.193395		0.00813934	0.0139354	0.00406967	0.0069677		0.253597	0.190362	0.000228115
Dorsal auditory area, layer 2/3	0.551047	0.612274	0.595692	0.623399	0.458355	0.436246	0.366939	0.486054		0.031811	0.0508964	0.0159055	0.0254482		0.595603	0.436899	0.00185028
Dorsal auditory area, layer 4	0.214721	0.252563	0.248736	0.243027	0.182832	0.174328	0.154344	0.199385		0.0171476	0.0187388	0.00857378	0.0093694		0.239762	0.177722	0.00275246
Dorsal auditory area, layer 5	0.529787	0.544669	0.577834	0.556224	0.420088	0.403931	0.346105	0.429148		0.0202676	0.0372966	0.0101338	0.0186483		0.552129	0.399818	0.000369886
Dorsal auditory area, layer 6a	0.308688	0.340152	0.308688	0.323466	0.229603	0.246186	0.206217	0.257146		0.0149866	0.0221583	0.00749328	0.0110791		0.320249	0.234788	0.000691709
Dorsal auditory area, layer 6b	0.104172	0.10077	0.107148	0.109533	0.0752587	0.0816367	0.0680305	0.0838614		0.00378968	0.00711587	0.00189484	0.00355794		0.105406	0.0771968	0.000424163
Primary auditory area	2.06855	2.1774	2.1842	2.26554	1.62975	1.59787	1.36359	1.75767		0.0808609	0.164303	0.0404305	0.0821517		2.17392	1.58722	0.000681247
Primary auditory area, layer 1	0.256815	0.265744	0.287004	0.278968	0.206643	0.21132	0.176454	0.215644		0.0134575	0.0177585	0.00672874	0.00887926		0.272133	0.202515	0.000778472
Primary auditory area, layer 2/3	0.566779	0.586763	0.597818	0.597727	0.470261	0.443474	0.379695	0.47279		0.0146146	0.0433204	0.00730729	0.0216602		0.587272	0.441555	0.000700444
Primary auditory area, layer 4	0.237681	0.266169	0.26787	0.26656	0.192186	0.186234	0.159021	0.210081		0.0146106	0.021158	0.00730529	0.010579		0.25957	0.186881	0.00131412
Primary auditory area, layer 5	0.59144	0.639912	0.619077	0.634523	0.443048	0.455379	0.3899	0.514721		0.0217394	0.0512373	0.0108697	0.0256186		0.621238	0.450762	0.000864803
Primary auditory area, layer 6a	0.321019	0.331223	0.315491	0.387646	0.250437	0.229603	0.194312	0.269555		0.0331801	0.0322136	0.01659	0.0161068		0.338845	0.235977	0.00433474
Primary auditory area, layer 6b	0.0948174	0.0875892	0.0969434	0.10012	0.0671801	0.0718573	0.0642038	0.0748763		0.00531908	0.00475708	0.00265954	0.00237854		0.0948676	0.0695293	0.000391614
Posterior auditory area	0.135636	0.149667	0.150517	0.151036	0.106298	0.107573	0.0897152	0.12023		0.00740713	0.0125198	0.00370357	0.00625992		0.146714	0.105954	0.00137584
Posterior auditory area, layer 1	0.0153069	0.0208343	0.0250862	0.0235326	0.0140313	0.0153069	0.0114801	0.0171146		0.00429753	0.0023682	0.00214876	0.0011841		0.02119	0.0144832	0.0340213
Posterior auditory area, layer 2/3	0.0420938	0.0454954	0.042519	0.0427865	0.0327397	0.0314641	0.0250862	0.031662		0.00154108	0.00347994	0.000770539	0.00173997		0.0432237	0.030238	0.000486074
Posterior auditory area, layer 4	0.015732	0.0199839	0.0153069	0.0171146	0.0131809	0.0131809	0.0114801	0.0166867		0.00211241	0.00218851	0.0010562	0.00109425		0.0170344	0.0136322	0.0666172
Posterior auditory area, layer 5	0.0408183	0.0420938	0.0480465	0.0457815	0.0301885	0.0301886	0.0263618	0.0329456		0.00332506	0.00270548	0.00166253	0.00135274		0.044185	0.0299211	0.000556345
Posterior auditory area, layer 6a	0.0170076	0.0174328	0.0161572	0.0162589	0.0123305	0.0131809	0.0127557	0.0166867		0.000611017	0.00199592	0.000305508	0.000997961		0.0167141	0.0137385	0.0291382
Posterior auditory area, layer 6b	0.00467709	0.00382671	0.00340152	0.00556224	0.00382671	0.00425191	0.00255114	0.00513437		0.000957221	0.0010748	0.00047861	0.000537398		0.00436689	0.00394103	0.575604
Ventral auditory area	1.93334	2.04857	2.01413	2.14489	1.51028	1.52516	1.28663	1.70632		0.087615	0.171886	0.0438075	0.0859431		2.03523	1.5071	0.00155075
Ventral auditory area, layer 1	0.277224	0.281051	0.280201	0.288809	0.226201	0.215572	0.194737	0.246878		0.00493893	0.0217241	0.00246946	0.0108621		0.281821	0.220847	0.00155238
Ventral auditory area, layer 2/3	0.430293	0.471961	0.471536	0.503169	0.343979	0.368215	0.296783	0.38465		0.0298929	0.038256	0.0149464	0.019128		0.46924	0.348407	0.00250757
Ventral auditory area, layer 4	0.231304	0.227902	0.225776	0.251157	0.185383	0.158596	0.150943	0.202808		0.0116395	0.0239974	0.00581974	0.0119987		0.234035	0.174432	0.00424014
Ventral auditory area, layer 5	0.55955	0.59229	0.595267	0.612275	0.425616	0.450702	0.376719	0.494611		0.0220319	0.049228	0.011016	0.024614		0.589845	0.436912	0.00129368
Ventral auditory area, layer 6a	0.342703	0.375443	0.343979	0.389357	0.25724	0.268295	0.207493	0.295226		0.0232608	0.0366962	0.0116304	0.0183481		0.362871	0.257064	0.00279275
Ventral auditory area, layer 6b	0.0922663	0.0999197	0.0973686	0.10012	0.0718572	0.0637786	0.0599519	0.08215		0.00365622	0.00982279	0.00182811	0.00491139		0.0974188	0.0694344	0.00176141
Visual areas	8.50296	9.64247	9.91672	9.66932	7.32518	7.07475	6.36298	7.85559		0.632109	0.620088	0.316055	0.310044		9.43286	7.15462	0.00212398
Visual areas, layer 1	0	0	0	0	0	0	0	0		0	0	0	0		0	0	#DIV/0!
Visual areas, layer 2/3	0	0	0	0	0	0	0	0		0	0	0	0		0	0	#DIV/0!
Visual areas, layer 4	0	0	0	0	0	0	0	0		0	0	0	0		0	0	#DIV/0!
Visual areas, layer 5	0	0	0	0	0	0	0	0		0	0	0	0		0	0	#DIV/0!
Visual areas, layer 6a	0	0	0	0	0	0	0	0		0	0	0	0		0	0	#DIV/0!
Visual areas, layer 6b	0	0	0	0	0	0	0	0		0	0	0	0		0	0	#DIV/0!
Anterolateral visual area	1.41843	1.5732	1.61402	1.58396	1.16162	1.11102	0.95923	1.23097		0.087698	0.115325	0.043849	0.0576625		1.5474	1.11571	0.000999614
Anterolateral visual area, layer 1	0.180706	0.201115	0.220249	0.203236	0.160722	0.152644	0.127982	0.15831		0.0161962	0.0150083	0.00809809	0.00750416		0.201326	0.149914	0.00347934
Anterolateral visual area, layer 2/3	0.384372	0.437521	0.448576	0.460383	0.331223	0.312515	0.26702	0.344859		0.0335519	0.033952	0.016776	0.016976		0.432713	0.313904	0.0025067
Anterolateral visual area, layer 4	0.164549	0.187934	0.188359	0.184838	0.13436	0.125006	0.114376	0.141195		0.0113565	0.0116473	0.00567826	0.00582365		0.18142	0.128734	0.000643074
Anterolateral visual area, layer 5	0.414135	0.446025	0.459206	0.452253	0.327822	0.324846	0.26702	0.35855		0.0199209	0.0381966	0.00996044	0.0190983		0.442905	0.319559	0.00123035
Anterolateral visual area, layer 6a	0.206643	0.231304	0.227477	0.222062	0.161147	0.151793	0.142864	0.176708		0.0108373	0.014462	0.00541867	0.00723101		0.221871	0.158128	0.00040607
Anterolateral visual area, layer 6b	0.0680305	0.069306	0.0701564	0.0611847	0.0463458	0.0442199	0.0399679	0.0513437		0.00408436	0.00472946	0.00204218	0.00236473		0.0671694	0.0454693	0.000441933
Anteromedial visual area	1.28833	1.41248	1.48944	1.40896	1.11698	1.06425	0.920538	1.13983		0.0830798	0.0984655	0.0415399	0.0492327		1.3998	1.0604	0.00188515
Anteromedial visual area, layer 1	0.207918	0.233855	0.247036	0.225057	0.184533	0.182407	0.156895	0.1904		0.0164084	0.0148325	0.00820422	0.00741624		0.228466	0.178559	0.00404882
Anteromedial visual area, layer 2/3	0.3359	0.361412	0.405207	0.37267	0.283177	0.274248	0.242784	0.297794		0.0287367	0.0232656	0.0143683	0.0116328		0.368797	0.274501	0.00221989
Anteromedial visual area, layer 4	0.130533	0.149667	0.157746	0.15831	0.127557	0.114802	0.106298	0.124081		0.0129693	0.00958041	0.00648463	0.0047902		0.149064	0.118184	0.00865644
Anteromedial visual area, layer 5	0.344829	0.373742	0.384372	0.361118	0.291681	0.276799	0.243634	0.309346		0.0170246	0.0278676	0.0085123	0.0139338		0.366015	0.280365	0.00192803
Anteromedial visual area, layer 6a	0.201965	0.215572	0.221099	0.223773	0.172627	0.159872	0.130959	0.163016		0.00971159	0.0179464	0.0048558	0.00897322		0.215602	0.156619	0.00117112
Anteromedial visual area, layer 6b	0.0671801	0.078235	0.0739831	0.0680305	0.0574007	0.0561252	0.0399679	0.0551945		0.00521905	0.00818622	0.00260953	0.00409311		0.0718572	0.0521721	0.00668606
Lateral visual area	0.552322	0.655644	0.650967	0.679877	0.476213	0.483442	0.415836	0.544243		0.0563628	0.0525051	0.0281814	0.0262526		0.634702	0.479934	0.00697134
Lateral visual area, layer 1	0.0633534	0.0735579	0.0795106	0.079155	0.062503	0.0591015	0.053574	0.0616125		0.00753752	0.00401627	0.00376876	0.00200813		0.0738942	0.0591977	0.0137757
Lateral visual area, layer 2/3	0.163698	0.19091	0.194312	0.194678	0.139037	0.143289	0.119479	0.166439		0.0148979	0.0192779	0.00744897	0.00963897		0.1859	0.142061	0.0113843
Lateral visual area, layer 4	0.0676053	0.0790854	0.0701564	0.0761599	0.0548496	0.0501725	0.0480465	0.0586174		0.00529002	0.00474282	0.00264501	0.00237141		0.0732518	0.0529215	0.00123427
Lateral visual area, layer 5	0.146265	0.173478	0.170501	0.187405	0.126282	0.139037	0.112675	0.145474		0.0170999	0.0145152	0.00854994	0.00725761		0.169412	0.130867	0.0138524
Lateral visual area, layer 6a	0.0858884	0.107148	0.106298	0.111673	0.0718572	0.0714321	0.0620778	0.0842893		0.011487	0.00911287	0.00574351	0.00455643		0.102752	0.0724141	0.00609186
Lateral visual area, layer 6b	0.0255114	0.0314641	0.0301885	0.0308063	0.0216847	0.0204092	0.019984	0.0278112		0.00270472	0.00363191	0.00135236	0.00181596		0.0294926	0.0224723	0.0211008
Primary visual area	4.078	4.65073	4.73109	4.63078	3.53333	3.40833	3.0737	3.78189		0.299588	0.294636	0.149794	0.147318		4.52265	3.44931	0.00220238
Primary visual area, layer 1	0.560401	0.617376	0.622054	0.613986	0.472387	0.495347	0.449426	0.510014		0.0288922	0.0265596	0.0144461	0.0132798		0.603454	0.481794	0.000811488
Primary visual area, layer 2/3	1.22455	1.36954	1.44437	1.39655	1.04129	1.04044	0.938396	1.12785		0.0946688	0.0774745	0.0473344	0.0387373		1.35875	1.03699	0.00190048
Primary visual area, layer 4	0.531913	0.616951	0.628006	0.614414	0.470261	0.443474	0.396703	0.502741		0.0443332	0.0448398	0.0221666	0.0224199		0.597821	0.453295	0.00375435
Primary visual area, layer 5	1.04809	1.23263	1.23305	1.19845	0.930742	0.866964	0.787878	0.992645		0.0881449	0.0876972	0.0440724	0.0438486		1.17806	0.894557	0.00385064
Primary visual area, layer 6a	0.578684	0.6701	0.656069	0.666185	0.506402	0.464308	0.414561	0.530552		0.0431242	0.050914	0.0215621	0.025457		0.64276	0.478956	0.00268373
Primary visual area, layer 6b	0.13436	0.14414	0.147541	0.141195	0.11225	0.0977939	0.0867389	0.118091		0.00560209	0.0141746	0.00280105	0.00708729		0.141809	0.103718	0.00245651
Posterolateral visual area	0.406907	0.508103	0.489819	0.485199	0.375868	0.346956	0.326972	0.420163		0.0448374	0.0404476	0.0224187	0.0202238		0.472507	0.36749	0.0131708
Posterolateral visual area, layer 1	0.0586763	0.0650541	0.0633534	0.0676026	0.0429442	0.0395428	0.0437946	0.0547666		0.00376028	0.0065973	0.00188014	0.00329865		0.0636716	0.0452621	0.00285558
Posterolateral visual area, layer 2/3	0.107998	0.139037	0.130108	0.133922	0.098219	0.0952428	0.0850381	0.113384		0.013677	0.0117236	0.00683849	0.00586179		0.127766	0.097971	0.0162444
Posterolateral visual area, layer 4	0.0416687	0.0561251	0.0608022	0.0590453	0.0454954	0.0391176	0.0429442	0.0509159		0.00871074	0.00494938	0.00435537	0.00247469		0.0544103	0.0446183	0.0984059
Posterolateral visual area, layer 5	0.120329	0.154344	0.142014	0.133922	0.114801	0.103321	0.0956679	0.115096		0.0142788	0.00945432	0.00713942	0.00472716		0.137652	0.107222	0.0120152
Posterolateral visual area, layer 6a	0.0680305	0.0841877	0.0837625	0.0800107	0.0667549	0.0625031	0.0561252	0.0782992		0.00754865	0.0093373	0.00377432	0.00466865		0.0789978	0.0659206	0.0722323
Posterolateral visual area, layer 6b	0.0102046	0.00935419	0.00977938	0.0106966	0.00765343	0.00722825	0.00340152	0.00770156		0.000575202	0.00207404	0.000287601	0.00103702		0.0100087	0.00649619	0.0171646
posteromedial visual area	0.758965	0.842302	0.941372	0.880546	0.661171	0.660747	0.666699	0.738494		0.0763635	0.037908	0.0381817	0.018954		0.855796	0.681778	0.00648516
posteromedial visual area, layer 1	0.0914159	0.109274	0.151793	0.111673	0.0799358	0.118203	0.124156	0.0907072		0.0254917	0.0213035	0.0127458	0.0106517		0.116039	0.10325	0.470579
posteromedial visual area, layer 2/3	0.262768	0.293381	0.320168	0.305923	0.223225	0.227052	0.230028	0.258858		0.0244476	0.0162846	0.0122238	0.00814232		0.29556	0.234791	0.00609544
posteromedial visual area, layer 4	0.0807862	0.087164	0.091416	0.0937024	0.0654793	0.0629283	0.0603771	0.0727369		0.00567565	0.00532838	0.00283782	0.00266419		0.0882671	0.0653804	0.00107232
posteromedial visual area, layer 5	0.181556	0.195162	0.206217	0.201524	0.164123	0.143289	0.140313	0.173713		0.0107111	0.0161838	0.00535555	0.0080919		0.196115	0.15536	0.00568573
posteromedial visual area, layer 6a	0.131809	0.143289	0.158171	0.155743	0.119904	0.0994947	0.104597	0.132638		0.0121861	0.015066	0.00609306	0.00753298		0.147253	0.114158	0.014217
posteromedial visual area, layer 6b	0.0106298	0.0140313	0.0136061	0.0119802	0.00850381	0.00977939	0.00722824	0.00984088		0.00156215	0.00123761	0.000781076	0.000618803		0.0125618	0.00883808	0.0096581
Anterior cingulate area	4.33992	4.80125	4.53593	4.07156	3.59626	3.20339	3.03841	3.42505		0.308456	0.245068	0.154228	0.122534		4.43717	3.31578	0.00126836
Anterior cingulate area, layer 1	0	0	0	0	0	0	0	0		0	0	0	0		0	0	#DIV/0!
Anterior cingulate area, layer 2/3	0	0	0	0	0	0	0	0		0	0	0	0		0	0	#DIV/0!
Anterior cingulate area, layer 5	0	0	0	0	0	0	0	0		0	0	0	0		0	0	#DIV/0!
Anterior cingulate area, layer 6a	0	0	0	0	0	0	0	0		0	0	0	0		0	0	#DIV/0!
Anterior cingulate area, layer 6b	0	0	0	0	0	0	0	0		0	0	0	0		0	0	#DIV/0!
Anterior cingulate area, dorsal part	2.38914	2.74333	2.623	2.38192	2.07876	1.86659	1.725	2.07086		0.178745	0.171178	0.0893725	0.0855888		2.53435	1.9353	0.00287793
Anterior cingulate area, dorsal part, layer 1	0.642463	0.767469	0.704966	0.685867	0.623754	0.506828	0.486418	0.594304		0.0519192	0.0665259	0.0259596	0.033263		0.700191	0.552826	0.0129428
Anterior cingulate area, dorsal part, layer 2/3	0.812964	0.918411	0.894601	0.751331	0.645864	0.639912	0.545094	0.712394		0.0766983	0.0688292	0.0383492	0.0344146		0.844327	0.635816	0.00675184
Anterior cingulate area, dorsal part, layer 5	0.582936	0.675202	0.69136	0.643081	0.543393	0.487694	0.460056	0.51686		0.04788	0.0360471	0.02394	0.0180236		0.648145	0.502001	0.00277475
Anterior cingulate area, dorsal part, layer 6a	0.314216	0.345255	0.299759	0.26656	0.236406	0.205367	0.213871	0.221206		0.0326706	0.0131632	0.0163353	0.00658161		0.306447	0.219212	0.00256934
Anterior cingulate area, dorsal part, layer 6b	0.0365664	0.0369916	0.0323145	0.0350849	0.0293381	0.026787	0.0195588	0.0260997		0.00211423	0.00416469	0.00105712	0.00208235		0.0352393	0.0254459	0.00572613
Anterior cingulate area, ventral part	1.95077	2.05792	1.91293	1.68964	1.5175	1.3368	1.31341	1.35419		0.154817	0.0928667	0.0774084	0.0464334		1.90282	1.38048	0.00116538
Anterior cingulate area, ventral part, layer 1	0.606321	0.667974	0.642463	0.581896	0.545519	0.450702	0.442623	0.488193		0.0381143	0.0469144	0.0190572	0.0234572		0.624664	0.48176	0.00323
Anterior cingulate area, ventral part, layer 2/3	0.645439	0.694336	0.637786	0.543816	0.42519	0.450277	0.418813	0.430004		0.0628895	0.0135998	0.0314448	0.0067999		0.630344	0.431071	0.000815635
Anterior cingulate area, ventral part, layer 5	0.45708	0.474938	0.417112	0.365397	0.374168	0.276799	0.309539	0.304639		0.0485967	0.0411932	0.0242984	0.0205966		0.428631	0.316286	0.0124134
Anterior cingulate area, ventral part, 6a	0.200265	0.184533	0.181131	0.1643	0.147541	0.129683	0.115227	0.103971		0.0147514	0.0188376	0.0073757	0.00941881		0.182557	0.124105	0.00274947
Anterior cingulate area, ventral part, 6b	0.0416687	0.0361412	0.0344404	0.0342292	0.0250862	0.0293382	0.0272122	0.0273833		0.00347298	0.00173795	0.00173649	0.000868977		0.0366199	0.027255	0.00293159
Prelimbic area	1.53196	1.69523	1.5647	1.54416	1.33765	1.20839	1.20371	1.3512		0.0753668	0.0801013	0.0376834	0.0400506		1.58401	1.27524	0.00136199
Prelimbic area, layer 1	0.386923	0.436671	0.417112	0.419735	0.367365	0.302311	0.312515	0.350849		0.0206942	0.0308798	0.0103471	0.0154399		0.41511	0.33326	0.00454975
Prelimbic area, layer 2	0.199839	0.21132	0.182832	0.163872	0.138187	0.159021	0.14499	0.154459		0.0206901	0.00936528	0.0103451	0.00468264		0.189466	0.149164	0.0120856
Prelimbic area, layer 2/3	0.354184	0.398829	0.350357	0.348282	0.294657	0.273398	0.263618	0.31448		0.0240683	0.0226912	0.0120342	0.0113456		0.362913	0.286538	0.00362373
Prelimbic area, layer 5	0.362262	0.392876	0.370766	0.394919	0.333774	0.289555	0.311665	0.333734		0.016208	0.021158	0.008104	0.010579		0.380206	0.317182	0.00322691
Prelimbic area, layer 6a	0.217697	0.242359	0.23428	0.204947	0.194737	0.173053	0.160722	0.1904		0.0167605	0.015758	0.00838027	0.00787902		0.224821	0.179728	0.00779963
Prelimbic area, layer 6b	0.0110549	0.0131809	0.00935419	0.0124081	0.008929	0.011055	0.0102046	0.00727369		0.00167855	0.00164565	0.000839276	0.000822826		0.0114995	0.00936556	0.119342
Infralimbic area	1.42694	1.5596	1.42226	1.50394	1.27727	1.1697	1.14972	1.34007		0.0659425	0.0901144	0.0329712	0.0450572		1.47819	1.23419	0.00471822
Infralimbic area, layer 1	0.261917	0.252563	0.24576	0.233186	0.220674	0.199415	0.197714	0.228052		0.0120895	0.0152122	0.00604473	0.00760612		0.248357	0.211463	0.00899569
Infralimbic area, layer 2	0.0663297	0.0799358	0.0727076	0.0808664	0.062503	0.0599519	0.0544244	0.0731648		0.00681176	0.00786227	0.00340588	0.00393113		0.0749599	0.062511	0.0537766
Infralimbic area, layer 2/3	0.366089	0.418813	0.396278	0.436422	0.355034	0.317192	0.31294	0.382511		0.0303691	0.0330195	0.0151846	0.0165098		0.4044	0.341919	0.031766
Infralimbic area, layer 5	0.389049	0.407332	0.341853	0.393636	0.317192	0.309114	0.306988	0.336301		0.0284888	0.0133465	0.0142444	0.00667324		0.382968	0.317399	0.00588915
Infralimbic area, layer 6a	0.287003	0.330798	0.307413	0.29651	0.263618	0.23428	0.227477	0.267415		0.0188553	0.0202497	0.00942767	0.0101248		0.305431	0.248198	0.00609892
Infralimbic area, layer 6b	0.0565503	0.0701564	0.0582511	0.063324	0.0582511	0.0497473	0.0501725	0.0526273		0.00611047	0.00391265	0.00305523	0.00195632		0.0620705	0.0526996	0.0416009
Orbital area	3.21146	4.04951	3.78037	3.84437	2.98781	2.94147	2.77607	3.38526		0.358837	0.25826	0.179419	0.12913		3.72143	3.02265	0.0195383
Orbital area, layer 1	0	0	0	0	0	0	0	0		0	0	0	0		0	0	#DIV/0!
Orbital area, layer 2/3	0	0	0	0	0	0	0	0		0	0	0	0		0	0	#DIV/0!
Orbital area, layer 5	0	0	0	0	0	0	0	0		0	0	0	0		0	0	#DIV/0!
Orbital area, layer 6a	0	0	0	0	0	0	0	0		0	0	0	0		0	0	#DIV/0!
Orbital area, layer 6b	0	0	0	0	0	0	0	0		0	0	0	0		0	0	#DIV/0!
Orbital area, lateral part	1.35253	1.69141	1.6102	1.62375	1.25644	1.26324	1.14291	1.40083		0.148925	0.105559	0.0744626	0.0527795		1.56947	1.26585	0.0158749
Orbital area, lateral part, layer 1	0.251287	0.334625	0.317617	0.325605	0.244484	0.241508	0.228327	0.281535		0.0379718	0.0228209	0.0189859	0.0114104		0.307284	0.248964	0.038911
Orbital area, lateral part, layer 2/3	0.543818	0.701564	0.673077	0.678166	0.52511	0.517457	0.474513	0.574194		0.0713124	0.0408529	0.0356562	0.0204265		0.649156	0.522819	0.0218171
Orbital area, lateral part, layer 5	0.381821	0.454103	0.429017	0.434711	0.326121	0.351633	0.305712	0.38465		0.0306694	0.0340626	0.0153347	0.0170313		0.424913	0.342029	0.0111424
Orbital area, lateral part, layer 6a	0.175178	0.20069	0.19006	0.18441	0.160297	0.152218	0.13436	0.159593		0.010675	0.0120709	0.00533752	0.00603545		0.187585	0.151617	0.00426429
Orbital area, lateral part, layer 6b	0.00042519	0.00042519	0.00042519	0.00085573	0.00042519	0.000425191	0	0.000855729		0.00021527	0.000349353	0.000107635	0.000174677		0.000532825	0.000426528	0.622944
Orbital area, medial part	0.771295	0.93712	0.861436	0.876695	0.723674	0.665424	0.665423	0.800106		0.0685226	0.0638404	0.0342613	0.0319202		0.861636	0.713657	0.0195611
Orbital area, medial part, layer 1	0.198139	0.214296	0.196438	0.211365	0.171777	0.164549	0.159446	0.201952		0.00907931	0.0190319	0.00453966	0.00951596		0.205059	0.174431	0.0271568
Orbital area, medial part, layer 2	0.0752587	0.107998	0.0990694	0.072737	0.0765343	0.0663298	0.0637786	0.0962695		0.0174682	0.0147616	0.00873412	0.00738082		0.0887659	0.075728	0.297679
Orbital area, medial part, layer 2/3	0.215997	0.275949	0.270846	0.262709	0.215997	0.184958	0.182832	0.216072		0.0274656	0.0185759	0.0137328	0.00928793		0.256375	0.199965	0.0144499
Orbital area, medial part, layer 5	0.198564	0.227477	0.188785	0.233614	0.169651	0.170502	0.189635	0.197245		0.0218032	0.0138467	0.0109016	0.00692337		0.21211	0.181758	0.0570397
Orbital area, medial part, layer 6a	0.0833373	0.1114	0.106298	0.0962696	0.0897152	0.0790855	0.0697312	0.0885679		0.0123742	0.00933587	0.0061871	0.00466794		0.0993261	0.081775	0.0641482
Orbital area, ventral part	0	0	0	0	0	0	0	0		0	0	0	0		0	0	#DIV/0!
Orbital area, ventrolateral part	1.08764	1.42099	1.30874	1.34392	1.0077	1.0128	0.967734	1.18433		0.143023	0.0962574	0.0715114	0.0481287		1.29032	1.04314	0.0285188
Orbital area, ventrolateral part, layer 1	0.218123	0.296358	0.29083	0.309346	0.207918	0.208769	0.211745	0.267843		0.0411005	0.029229	0.0205502	0.0146145		0.278664	0.224069	0.0735645
Orbital area, ventrolateral part, layer 2/3	0.471961	0.640762	0.561677	0.580185	0.452403	0.453679	0.430718	0.517288		0.069834	0.0373605	0.034917	0.0186802		0.563646	0.463522	0.0447762
Orbital area, ventrolateral part, layer 5	0.200265	0.254689	0.235556	0.234042	0.182832	0.182407	0.174328	0.209226		0.0226257	0.0151973	0.0113128	0.00759863		0.231138	0.187198	0.0180406
Orbital area, ventrolateral part, layer 6a	0.195588	0.227052	0.218548	0.217783	0.163273	0.166675	0.149667	0.187405		0.0134431	0.0156048	0.00672157	0.00780242		0.214743	0.166755	0.00346838
Orbital area, ventrolateral part, layer 6b	0.00170076	0.00212595	0.00212595	0.00256719	0.00127557	0.00127557	0.00127557	0.00256719		0.000353748	0.000645807	0.000176874	0.000322904		0.00212996	0.00159848	0.198965
Agranular insular area	4.078	4.37138	4.28677	4.54136	3.3403	3.17533	2.83985	3.73911		0.192618	0.373695	0.0963092	0.186847		4.31938	3.27364	0.00251487
Agranular insular area, dorsal part	1.99117	2.21184	2.14849	2.24971	1.65867	1.56088	1.40908	1.86848		0.114013	0.192482	0.0570066	0.0962412		2.1503	1.62428	0.00331711
Agranular insular area, dorsal part, layer 1	0.395852	0.438371	0.428592	0.465089	0.336751	0.314216	0.26702	0.385506		0.0285993	0.0492409	0.0142996	0.0246204		0.431976	0.325873	0.00977588
Agranular insular area, dorsal part, layer 2/3	0.860585	0.962631	0.943923	0.986656	0.727926	0.682857	0.626306	0.823211		0.0547766	0.0832197	0.0273883	0.0416099		0.938449	0.715075	0.00417408
Agranular insular area, dorsal part, layer 5	0.542118	0.610148	0.576984	0.590026	0.443474	0.419663	0.388199	0.485198		0.0285976	0.0408828	0.0142988	0.0204414		0.579819	0.434134	0.00111096
Agranular insular area, dorsal part, layer 6a	0.183682	0.188785	0.187934	0.196818	0.142864	0.137337	0.121179	0.165584		0.00548355	0.0183658	0.00274177	0.0091829		0.189305	0.141741	0.00254432
Agranular insular area, dorsal part, layer 6b	0.008929	0.0119053	0.011055	0.0111245	0.00765343	0.00680305	0.00637786	0.00898515		0.00127593	0.00114978	0.000637967	0.000574892		0.0107534	0.00745487	0.00854903
Agranular insular area, posterior part	1.14164	1.16672	1.15312	1.22626	0.900128	0.883121	0.798083	0.988367		0.0376412	0.0779982	0.0188206	0.0389991		1.17193	0.892425	0.00065523
Agranular insular area, posterior part, layer 1	0.337176	0.341003	0.343979	0.351277	0.261917	0.269996	0.232154	0.293943		0.0059683	0.0254952	0.00298415	0.0127476		0.343359	0.264503	0.00094526
Agranular insular area, posterior part, layer 2/3	0.316342	0.333349	0.328672	0.356411	0.264043	0.241083	0.228327	0.290092		0.0167583	0.0271735	0.00837915	0.0135867		0.333694	0.255886	0.00278226
Agranular insular area, posterior part, layer 5	0.287003	0.294232	0.288279	0.309346	0.225776	0.225351	0.202816	0.247733		0.0102501	0.0183391	0.00512506	0.00916955		0.294715	0.225419	0.000583235
Agranular insular area, posterior part, layer 6a	0.201115	0.198139	0.192186	0.209226	0.148391	0.146691	0.134785	0.156598		0.00708921	0.00899571	0.00354461	0.00449785		0.200166	0.146617	8.48103e-05
Agranular insular area, posterior part, layer 6b	0	0	0	0	0	0	0	0		0	0	0	0		0	0	#DIV/0!
Agranular insular area, ventral part	0.945198	0.99282	0.985166	1.06538	0.7815	0.731328	0.632684	0.882256		0.0500571	0.103928	0.0250286	0.0519639		0.997142	0.756942	0.00591439
Agranular insular area, ventral part, layer 1	0.167525	0.170076	0.174328	0.177564	0.137762	0.125857	0.106723	0.158738		0.0044552	0.0217906	0.0022276	0.0108953		0.172373	0.13227	0.011282
Agranular insular area, ventral part, layer 2/3	0.377569	0.396703	0.388199	0.442412	0.306562	0.288705	0.247036	0.351277		0.0285548	0.0431851	0.0142774	0.0215925		0.401221	0.298395	0.00734787
Agranular insular area, ventral part, layer 5	0.305712	0.32442	0.326546	0.339725	0.247886	0.239382	0.213446	0.293943		0.0140041	0.0335522	0.00700203	0.0167761		0.324101	0.248664	0.00601302
Agranular insular area, ventral part, layer 6a	0.0935419	0.10077	0.0960931	0.105255	0.0888648	0.0773847	0.0654793	0.0778713		0.00517905	0.00955276	0.00258952	0.00477638		0.0989149	0.0774	0.00745254
Agranular insular area, ventral part, layer 6b	0.000850381	0.000850381	0	0.000427865	0.00042519	0	0	0.000427864		0.000406858	0.000246258	0.000203429	0.000123129		0.000532157	0.000213264	0.228433
Retrosplenial area	5.40715	5.74177	6.01389	5.58577	4.55549	4.62693	4.26679	4.61109		0.25718	0.168336	0.12859	0.0841679		5.68715	4.51507	0.000265053
Retrosplenial area, lateral agranular part	0.639061	0.680305	0.75939	0.688007	0.5587	0.52256	0.520008	0.564353		0.0499877	0.0233718	0.0249939	0.0116859		0.691691	0.541405	0.00159196
Retrosplenial area, lateral agranular part, layer 1	0.111825	0.121179	0.130108	0.121514	0.0909907	0.0990695	0.0960931	0.0979809		0.00746857	0.00357969	0.00373428	0.00178985		0.121157	0.0960336	0.000910028
Retrosplenial area, lateral agranular part, layer 2/3	0.190485	0.207493	0.241508	0.21436	0.172627	0.159447	0.163698	0.169862		0.0212207	0.00595579	0.0106104	0.0029779		0.213462	0.166409	0.00526503
Retrosplenial area, lateral agranular part, layer 5	0.183257	0.192611	0.210044	0.189116	0.158596	0.147116	0.143714	0.157882		0.0115234	0.00753855	0.00576172	0.00376928		0.193757	0.151827	0.000891959
Retrosplenial area, lateral agranular part, layer 6a	0.131384	0.139888	0.154769	0.142479	0.117353	0.102046	0.102896	0.121513		0.00966753	0.00994534	0.00483376	0.00497267		0.14213	0.110952	0.0041223
Retrosplenial area, lateral agranular part, layer 6b	0.0221099	0.0191336	0.0229603	0.0205375	0.0191336	0.0148817	0.0136061	0.0171146		0.00169654	0.00244319	0.000848268	0.0012216		0.0211853	0.016184	0.015176
Retrosplenial area, dorsal part	1.92314	2.03624	2.26499	1.98743	1.61785	1.65399	1.58596	1.61091		0.148755	0.0281044	0.0743777	0.0140522		2.05295	1.61718	0.0011968
Retrosplenial area, dorsal part, layer 1	0.328247	0.359286	0.468135	0.34272	0.286578	0.325271	0.325271	0.278968		0.063635	0.0247321	0.0318175	0.0123661		0.374597	0.304022	0.0841831
Retrosplenial area, dorsal part, layer 2/3	0.55955	0.574007	0.654368	0.557508	0.466009	0.474088	0.464733	0.453536		0.0459308	0.00845435	0.0229654	0.00422717		0.586358	0.464592	0.00198656
Retrosplenial area, dorsal part, layer 4	0	0	0	0	0	0	0	0		0	0	0	0		0	0	#DIV/0!
Retrosplenial area, dorsal part, layer 5	0.642463	0.689659	0.719848	0.673459	0.525961	0.551898	0.519583	0.565209		0.0322779	0.0215194	0.016139	0.0107597		0.681357	0.540662	0.000348933
Retrosplenial area, dorsal part, layer 6a	0.358435	0.369916	0.381396	0.37481	0.309539	0.276799	0.253414	0.289236		0.00968768	0.0234857	0.00484384	0.0117428		0.371139	0.282247	0.000424161
Retrosplenial area, dorsal part, layer 6b	0.0344404	0.0433694	0.0412435	0.0389357	0.0297633	0.0259366	0.0229603	0.0239604		0.00382666	0.00300504	0.00191333	0.00150252		0.0394973	0.0256552	0.00127191
Retrosplenial area, ventral part	2.84495	3.02523	2.98951	2.91034	2.37894	2.45038	2.16082	2.43583		0.08084	0.134041	0.04042	0.0670205		2.94251	2.35649	0.000293236
Retrosplenial area, ventral part, layer 1	0.584212	0.620353	0.619928	0.598583	0.508103	0.51193	0.447726	0.512582		0.0176023	0.0316346	0.00880115	0.0158173		0.605769	0.495085	0.000873042
Retrosplenial area, ventral part, layer 2	0.275098	0.282326	0.292531	0.269127	0.215572	0.250863	0.205367	0.231902		0.0100744	0.0198951	0.0050372	0.00994753		0.279771	0.225926	0.0029131
Retrosplenial area, ventral part, layer 2/3	0.540417	0.557425	0.567629	0.533547	0.420088	0.454104	0.415836	0.463377		0.0155799	0.0239089	0.00778995	0.0119544		0.549755	0.438351	0.000232834
Retrosplenial area, ventral part, layer 5	0.929466	1.04257	0.977088	1.00762	0.807011	0.819343	0.730903	0.81936		0.047966	0.0425672	0.023983	0.0212836		0.989186	0.794154	0.000897857
Retrosplenial area, ventral part, layer 6a	0.46941	0.476638	0.485993	0.454392	0.3899	0.382672	0.330798	0.377376		0.0133346	0.0267558	0.00666729	0.0133779		0.471608	0.370187	0.000501204
Retrosplenial area, ventral part, layer 6b	0.0463457	0.0459206	0.0463458	0.0470651	0.0382671	0.0314641	0.0301885	0.0312341		0.000474921	0.00369438	0.000237461	0.00184719		0.0464193	0.0327885	0.000332202
Posterior parietal association areas	2.63235	2.93381	2.82922	2.85172	2.24245	2.10852	1.78793	2.18553		0.127783	0.203014	0.0638914	0.101507		2.81178	2.08111	0.000890455
Posterior parietal association areas, layer 1	0.398829	0.442198	0.446875	0.415457	0.337176	0.318893	0.273823	0.33459		0.0227119	0.0293328	0.011356	0.0146664		0.42584	0.31612	0.00103926
Posterior parietal association areas, layer 2/3	0.70284	0.781925	0.75854	0.782137	0.605896	0.585913	0.480891	0.611418		0.0373595	0.0610833	0.0186798	0.0305416		0.75636	0.57103	0.00206101
Posterior parietal association areas, layer 4	0.24491	0.26702	0.262768	0.267415	0.220674	0.204517	0.173903	0.217355		0.0106227	0.0213106	0.00531137	0.0106553		0.260528	0.204112	0.00319618
Posterior parietal association areas, layer 5	0.72665	0.834224	0.778524	0.808237	0.607597	0.576984	0.501725	0.588741		0.0461698	0.0464361	0.0230849	0.023218		0.786909	0.568762	0.000552877
Posterior parietal association areas, layer 6a	0.424765	0.442623	0.433694	0.422303	0.350357	0.317618	0.271697	0.327316		0.00925171	0.0330233	0.00462585	0.0165117		0.430846	0.316747	0.000556776
Posterior parietal association areas, layer 6b	0.13436	0.165824	0.148817	0.156171	0.120754	0.104597	0.0858885	0.10611		0.013264	0.0142955	0.00663201	0.00714773		0.151293	0.104337	0.00295311
Temporal association areas	2.77734	2.99504	3.00312	3.13625	2.16209	2.26499	1.95418	2.51541		0.148579	0.233267	0.0742896	0.116633		2.97794	2.22417	0.00158604
Temporal association areas, layer 1	0.466859	0.514055	0.522984	0.507448	0.384372	0.384373	0.313365	0.410322		0.0248156	0.0416646	0.0124078	0.0208323		0.502837	0.373108	0.00174429
Temporal association areas, layer 2/3	0.698163	0.757264	0.741957	0.772296	0.540842	0.552323	0.511079	0.611418		0.0319993	0.042091	0.0159996	0.0210455		0.74242	0.553916	0.000383066
Temporal association areas, layer 4	0.235981	0.265744	0.24661	0.287525	0.195162	0.201966	0.169651	0.221206		0.0226756	0.0213067	0.0113378	0.0106533		0.258965	0.196996	0.00725685
Temporal association areas, layer 5	0.832097	0.879294	0.906931	0.966119	0.640337	0.699864	0.59144	0.794116		0.0559723	0.0872255	0.0279862	0.0436127		0.89611	0.681439	0.00606071
Temporal association areas, layer 6a	0.405632	0.435395	0.444749	0.460383	0.30231	0.318468	0.287004	0.359406		0.0230398	0.031176	0.0115199	0.015588		0.43654	0.316797	0.000827082
Temporal association areas, layer 6b	0.138612	0.143289	0.139888	0.142479	0.0990694	0.107998	0.0816366	0.118946		0.00218703	0.0157732	0.00109351	0.00788662		0.141067	0.101913	0.00266322
Perirhinal area	1.09784	1.14929	1.17735	1.2284	0.877593	0.917987	0.826996	1.00634		0.0545177	0.0758372	0.0272589	0.0379186		1.16322	0.907228	0.001541
Perirhinal area, layer 6a	0.131809	0.144565	0.136061	0.149325	0.100345	0.115227	0.0994946	0.128359		0.00795033	0.0137239	0.00397517	0.00686193		0.14044	0.110856	0.0097311
Perirhinal area, layer 6b	0.0501725	0.0591015	0.0586763	0.0590453	0.0416687	0.0463458	0.0386923	0.050488		0.00438834	0.00519122	0.00219417	0.00259561		0.0567489	0.0442987	0.0105398
Perirhinal area, layer 1	0.248311	0.265744	0.287429	0.287525	0.211745	0.213021	0.188785	0.22634		0.0189659	0.0155913	0.00948297	0.00779563		0.272252	0.209973	0.00228052
Perirhinal area, layer 5	0.315491	0.325696	0.327397	0.346143	0.24576	0.253414	0.23343	0.276828		0.0127729	0.0182732	0.00638644	0.00913658		0.328682	0.252358	0.000477386
Perirhinal area, layer 2/3	0.352058	0.354184	0.36779	0.386362	0.278075	0.28998	0.266594	0.324321		0.0157964	0.0249514	0.00789819	0.0124757		0.365098	0.289743	0.0022139
Ectorhinal area	2.43719	2.70719	2.69443	2.79053	1.99032	2.04262	1.76284	2.24372		0.152825	0.197623	0.0764127	0.0988116		2.65734	2.00987	0.00204754
Ectorhinal area/Layer 1	0.511079	0.569755	0.55785	0.554941	0.417112	0.41201	0.3899	0.436422		0.0256969	0.0191235	0.0128485	0.00956173		0.548406	0.413861	0.000154983
Ectorhinal area/Layer 2/3	0.790854	0.889923	0.890774	0.909213	0.650541	0.687959	0.549346	0.717529		0.0536348	0.0733149	0.0268174	0.0366575		0.870191	0.651344	0.00294505
Ectorhinal area/Layer 5	0.750036	0.79213	0.796382	0.851879	0.589314	0.601645	0.534465	0.700842		0.041793	0.0693023	0.0208965	0.0346511		0.797607	0.606566	0.00325398
Ectorhinal area/Layer 6a	0.296358	0.354609	0.348231	0.371387	0.262342	0.266595	0.229178	0.302072		0.0323673	0.0298171	0.0161837	0.0149086		0.342646	0.265047	0.0124189
Ectorhinal area/Layer 6b	0.0888648	0.10077	0.101195	0.103115	0.0710068	0.0744084	0.0599519	0.0868565		0.00649505	0.0110785	0.00324753	0.00553925		0.0984864	0.0730559	0.00744747
Olfactory areas	27.0391	32.9425	22.7026	39.4526	26.8448	17.7611	21.4738	32.1185		7.2775	6.2743	3.63875	3.13715		30.5342	24.5496	0.259325
Main olfactory bulb	8.49828	13.3442	2.6213	17.6708	11.7259	1.31852	8.96854	14.5452		6.47009	5.68942	3.23505	2.84471		10.5336	9.13955	0.757213
Main olfactory bulb, glomerular layer	2.16167	3.20423	0.321444	4.28977	2.8998	0.197714	2.04559	3.37029		1.68915	1.39902	0.844575	0.699509		2.49428	2.12835	0.749971
Main olfactory bulb, granule layer	1.96183	3.59796	1.15737	4.75914	3.05882	0.545095	2.62343	4.00994		1.6183	1.46231	0.809149	0.731154		2.86907	2.55932	0.785932
Main olfactory bulb, inner plexiform layer	0.43667	0.718147	0.155195	0.910924	0.638211	0.0595267	0.497898	0.742345		0.330225	0.300496	0.165112	0.150248		0.555234	0.484495	0.762076
Main olfactory bulb, mitral layer	0.40138	0.661596	0.137337	0.836904	0.556999	0.0722825	0.43582	0.645219		0.30579	0.25194	0.152895	0.12597		0.509304	0.42758	0.694287
Main olfactory bulb, outer plexiform layer	2.25181	3.33774	0.68073	4.62222	3.13025	0.366515	2.35641	3.86918		1.67111	1.50831	0.835556	0.754154		2.72313	2.43059	0.803627
Accessory olfactory bulb	0.394577	0.660746	0.470261	0.68929	0.503	0.149667	0.442198	0.610135		0.143905	0.197025	0.0719525	0.0985125		0.553718	0.42625	0.336329
Accessory olfactory bulb, glomerular layer	0.0880144	0.122455	0.103321	0.131782	0.102896	0.0344405	0.091416	0.115951		0.0195772	0.0359173	0.00978861	0.0179586		0.111393	0.0861759	0.263713
Accessory olfactory bulb, granular layer	0.0807862	0.164974	0.104597	0.160877	0.114801	0.0229603	0.103321	0.143762		0.041732	0.0517138	0.020866	0.0258569		0.127809	0.0962114	0.378335
Accessory olfactory bulb, mitral layer	0.0731327	0.133085	0.102471	0.126648	0.0994946	0.0331649	0.0858885	0.115951		0.027206	0.0358152	0.013603	0.0179076		0.108834	0.0836248	0.305142
Anterior olfactory nucleus	2.75608	3.6915	3.29523	4.28635	2.76714	2.90108	2.60514	3.39981		0.645536	0.343058	0.322768	0.171529		3.50729	2.91829	0.158214
Anterior olfactory nucleus, dorsal part	0.184958	0.258091	0.243209	0.260998	0.187084	0.191761	0.171777	0.225485		0.0354377	0.022642	0.0177189	0.011321		0.236814	0.194027	0.0880651
Anterior olfactory nucleus, external part	0.176029	0.255114	0.191761	0.295655	0.192186	0.148392	0.161572	0.254579		0.0557251	0.0473004	0.0278625	0.0236502		0.22964	0.189182	0.310687
Anterior olfactory nucleus, lateral part	0.404356	0.588038	0.503426	0.694425	0.434545	0.421789	0.398404	0.549378		0.123373	0.0672523	0.0616867	0.0336262		0.547561	0.451029	0.218561
Anterior olfactory nucleus, medial part	0.471111	0.607597	0.547645	0.677738	0.446025	0.484292	0.407758	0.566492		0.0878534	0.0678554	0.0439267	0.0339277		0.576023	0.476142	0.12203
Anterior olfactory nucleus, posteroventral part	0.460906	0.554023	0.464733	0.70341	0.427742	0.447726	0.37927	0.512154		0.113559	0.0550526	0.0567797	0.0275263		0.545768	0.441723	0.150265
Anterior olfactory nucleus, layer 1	0.838475	1.10209	0.980064	1.31954	0.846979	0.842728	0.768745	0.999063		0.203792	0.096708	0.101896	0.048354		1.06004	0.864379	0.133466
Anterior olfactory nucleus, layer 2	0	0	0	0	0	0	0	0		0	0	0	0		0	0	#DIV/0!
Taenia tecta	1.33552	1.5681	1.3976	1.64985	1.13526	1.16502	1.05065	1.39355		0.146096	0.146531	0.0730478	0.0732656		1.48777	1.18612	0.0267837
Taenia tecta, dorsal part	1.00515	1.16885	1.04639	1.16935	0.8372	0.857185	0.784477	1.02345		0.0844473	0.103243	0.0422236	0.0516214		1.09744	0.875578	0.0158718
Taenia tecta, dorsal part, layers 1-4	0	0	0	0	0	0	0	0		0	0	0	0		0	0	#DIV/0!
Taenia tecta, dorsal part, layer 1	0.331648	0.412009	0.32357	0.371387	0.281476	0.284028	0.242359	0.337585		0.0406822	0.0391127	0.0203411	0.0195564		0.359654	0.286362	0.0408035
Taenia tecta, dorsal part, layer 2	0.33505	0.379695	0.370766	0.415457	0.2802	0.292106	0.281051	0.350421		0.0330277	0.033427	0.0165138	0.0167135		0.375242	0.300945	0.0195114
Taenia tecta, dorsal part, layer 3	0.250862	0.285728	0.261917	0.296082	0.203241	0.210895	0.195588	0.258858		0.0208648	0.0285019	0.0104324	0.014251		0.273648	0.217145	0.0186191
Taenia tecta, dorsal part, layer 4	0.0875892	0.0914159	0.0901404	0.0864287	0.0722824	0.0701565	0.0654793	0.0765877		0.0022872	0.00461852	0.0011436	0.00230926		0.0888936	0.0711265	0.000459728
Taenia tecta, ventral part	0.330373	0.399254	0.351207	0.480492	0.298058	0.307838	0.266169	0.370103		0.0666691	0.0435108	0.0333345	0.0217554		0.390332	0.310542	0.0918549
Taenia tecta, ventral part, layers 1-3	0	0	0	0	0	0	0	0		0	0	0	0		0	0	#DIV/0!
Taenia tecta, ventral part, layer 1	0.16795	0.199414	0.175178	0.243883	0.154344	0.161147	0.135211	0.192111		0.03427	0.0236429	0.017135	0.0118215		0.196606	0.160703	0.135344
Taenia tecta, ventral part, layer 2	0.10162	0.133935	0.116927	0.167723	0.100345	0.0977939	0.0833373	0.121086		0.0283713	0.015552	0.0141856	0.00777599		0.130051	0.10064	0.118939
Taenia tecta, ventral part, layer 3	0.0608022	0.0659045	0.0591015	0.0688862	0.0433694	0.048897	0.0476213	0.056906		0.00452024	0.00565572	0.00226012	0.00282786		0.0636736	0.0491984	0.00713041
Dorsal peduncular area	0.258091	0.281051	0.256815	0.285386	0.222375	0.2228	0.207918	0.244738		0.0149897	0.0151872	0.00749484	0.00759359		0.270336	0.224458	0.00509305
Dorsal peduncular area, layer 1	0.0807862	0.0884396	0.0858885	0.0894237	0.071432	0.0727076	0.0671801	0.0774435		0.00386427	0.00422454	0.00193214	0.00211227		0.0861345	0.0721908	0.00279188
Dorsal peduncular area, layer 2	0	0	0	0	0	0	0	0		0	0	0	0		0	0	#DIV/0!
Dorsal peduncular area, layer 2/3	0.0841877	0.08929	0.073558	0.0937024	0.0727076	0.0625031	0.0612274	0.078727		0.0086714	0.00838272	0.0043357	0.00419136		0.0851845	0.0687913	0.0347152
Dorsal peduncular area, layer 5	0.0637786	0.0731327	0.0680305	0.0705977	0.0586763	0.0676054	0.0561252	0.066319		0.00399094	0.00564219	0.00199547	0.00282109		0.0688849	0.0621814	0.100451
Dorsal peduncular area, layer 6a	0.0293381	0.0301885	0.0293381	0.031662	0.0195588	0.019984	0.0233855	0.0222489		0.00109613	0.00182697	0.000548066	0.000913485		0.0301317	0.0212943	0.000166246
Piriform area	10.6123	10.9525	10.7322	11.9875	8.5931	8.45917	6.84089	9.68728		0.626935	1.17312	0.313468	0.586558		11.0711	8.39511	0.00692967
Piriform area, layers 1-3	0	0	0	0	0	0	0	0		0	0	0	0		0	0	#DIV/0!
Piriform area, molecular layer	3.97085	4.09628	3.99594	4.49985	3.18765	3.15066	2.40913	3.54015		0.245471	0.475438	0.122735	0.237719		4.14073	3.0719	0.00715857
Piriform area, pyramidal layer	3.00227	3.1209	3.03203	3.40495	2.44399	2.39468	1.94312	2.78411		0.183656	0.345425	0.0918282	0.172712		3.14004	2.39148	0.00869083
Piriform area, polymorph layer	3.6392	3.7353	3.70426	4.08269	2.96145	2.91383	2.48864	3.36301		0.198954	0.357556	0.0994768	0.178778		3.79036	2.93173	0.00570593
Nucleus of the lateral olfactory tract	0.336751	0.323995	0.345255	0.370531	0.265319	0.256815	0.0680305	0.30849		0.0196481	0.106845	0.00982404	0.0534224		0.344133	0.224664	0.070157
Nucleus of the lateral olfactory tract, layers 1-3	0	0	0	0	0	0	0	0		0	0	0	0		0	0	#DIV/0!
Nucleus of the lateral olfactory tract, molecular layer	0.143714	0.134785	0.140313	0.157454	0.1114	0.109699	0.0272122	0.136489		0.00965376	0.0475947	0.00482688	0.0237973		0.144067	0.0962	0.0961784
Nucleus of the lateral olfactory tract, pyramidal layer	0.12203	0.117353	0.125856	0.144618	0.0922663	0.0918412	0.0250862	0.0979809		0.0119531	0.0345851	0.00597654	0.0172926		0.127464	0.0767937	0.0324459
Nucleus of the lateral olfactory tract, layer 3	0.0710068	0.0718572	0.0790854	0.0684584	0.0616526	0.0552748	0.0157321	0.0740205		0.00455719	0.0251908	0.0022786	0.0125954		0.0726019	0.05167	0.153097
Cortical amygdalar area	2.10682	1.98777	1.90315	2.41701	1.53919	1.71012	1.09657	1.99085		0.224968	0.374626	0.112484	0.187313		2.10369	1.58418	0.0549418
Cortical amygdalar area, anterior part	0.484717	0.461332	0.441348	0.535687	0.353758	0.383097	0.120754	0.447974		0.0406751	0.142634	0.0203376	0.0713171		0.480771	0.326396	0.0825474
Cortical amygdalar area, anterior part, layer 1	0.219398	0.220674	0.208769	0.262709	0.168375	0.180706	0.0493221	0.216927		0.02382	0.0726569	0.01191	0.0363284		0.227887	0.153833	0.100855
Cortical amygdalar area, anterior part, layer 2	0.265319	0.240658	0.232579	0.272978	0.185383	0.202391	0.071432	0.231047		0.0193231	0.0700045	0.00966156	0.0350022		0.252883	0.172563	0.0689535
Cortical amygdalar area, anterior part, layer 3	0	0	0	0	0	0	0	0		0	0	0	0		0	0	#DIV/0!
Cortical amygdalar area, posterior part	1.6221	1.52643	1.4618	1.88132	1.18543	1.32702	0.975812	1.54288		0.184427	0.238618	0.0922134	0.119309		1.62292	1.25779	0.0517626
Cortical amygdalar area, posterior part, lateral zone	0.814665	0.775972	0.724525	0.930178	0.584637	0.667125	0.424765	0.753041		0.0874096	0.139824	0.0437048	0.0699118		0.811335	0.607392	0.0482233
Cortical amygdalar area, posterior part, lateral zone, layers 1-2	0	0	0	0	0	0	0	0		0	0	0	0		0	0	#DIV/0!
Cortical amygdalar area, posterior part, lateral zone, layers 1-3	0	0	0	0	0	0	0	0		0	0	0	0		0	0	#DIV/0!
Cortical amygdalar area, posterior part, lateral zone, layer 1	0.230028	0.211745	0.189635	0.25244	0.162848	0.182407	0.0829122	0.213076		0.0267046	0.0555861	0.0133523	0.027793		0.220962	0.160311	0.0967491
Cortical amygdalar area, posterior part, lateral zone, layer 2	0.272122	0.24491	0.230453	0.29052	0.182407	0.21217	0.129258	0.235325		0.0269453	0.0458003	0.0134727	0.0229001		0.259501	0.18979	0.0393881
Cortical amygdalar area, posterior part, lateral zone, layer 3	0.312515	0.319318	0.304436	0.387218	0.239382	0.272547	0.212595	0.304639		0.0380533	0.0399711	0.0190266	0.0199855		0.330872	0.257291	0.0371981
Cortical amygdalar area, posterior part, medial zone	0.807436	0.750461	0.73728	0.951143	0.600794	0.659896	0.551047	0.789838		0.0978964	0.103061	0.0489482	0.0515306		0.81158	0.650394	0.0638505
Cortical amygdalar area, posterior part, medial zone, layers 1-2	0	0	0	0	0	0	0	0		0	0	0	0		0	0	#DIV/0!
Cortical amygdalar area, posterior part, medial zone, layers 1-3	0	0	0	0	0	0	0	0		0	0	0	0		0	0	#DIV/0!
Cortical amygdalar area, posterior part, medial zone, layer 1	0.17943	0.166249	0.162848	0.206659	0.127982	0.148817	0.105872	0.178847		0.0199038	0.0310665	0.00995192	0.0155333		0.178797	0.14038	0.0824538
Cortical amygdalar area, posterior part, medial zone, layer 2	0.212595	0.201965	0.202816	0.243455	0.168801	0.171352	0.144565	0.200668		0.0194393	0.0229747	0.00971963	0.0114874		0.215208	0.171346	0.0268107
Cortical amygdalar area, posterior part, medial zone, layer 3	0.415411	0.382246	0.371616	0.50103	0.304011	0.339728	0.30061	0.410322		0.058679	0.0509409	0.0293395	0.0254705		0.417576	0.338668	0.0885477
Piriform-amygdalar area	0.565078	0.542543	0.499599	0.605001	0.417962	0.438372	0.262768	0.524562		0.0440113	0.109036	0.0220057	0.0545181		0.553055	0.410916	0.0520277
Piriform-amygdalar area, layers 1-3	0	0	0	0	0	0	0	0		0	0	0	0		0	0	#DIV/0!
Piriform-amygdalar area, molecular layer	0.237256	0.214296	0.205367	0.240888	0.16795	0.179431	0.0837625	0.208798		0.0173346	0.0536474	0.00866731	0.0268237		0.224452	0.159985	0.0622064
Piriform-amygdalar area, pyramidal layer	0.140313	0.140738	0.125006	0.151464	0.104597	0.11055	0.0693061	0.138628		0.0108835	0.0284809	0.00544176	0.0142405		0.13938	0.10577	0.0696504
Piriform-amygdalar area, polymorph layer	0.187509	0.187509	0.169226	0.212649	0.145415	0.148392	0.109699	0.177136		0.0178375	0.0276311	0.00891876	0.0138156		0.189223	0.14516	0.0365597
Postpiriform transition area	0.866538	0.886522	0.888223	1.08036	0.686257	0.769596	0.71347	0.845888		0.100449	0.0705176	0.0502246	0.0352588		0.93041	0.753803	0.0281321
Postpiriform transition area, layers 1-3	0	0	0	0	0	0	0	0		0	0	0	0		0	0	#DIV/0!
Postpiriform transition area, layers 1	0.314641	0.308263	0.295933	0.411606	0.24661	0.27935	0.247036	0.303356		0.053233	0.0275145	0.0266165	0.0137573		0.332611	0.269088	0.0782697
Postpiriform transition area, layers 2	0.199414	0.204091	0.208343	0.230191	0.159872	0.174753	0.161572	0.18826		0.0136181	0.0132247	0.00680906	0.00661234		0.21051	0.171114	0.00600658
Postpiriform transition area, layers 3	0.352483	0.374168	0.383947	0.438561	0.279775	0.315492	0.304862	0.354272		0.0366227	0.0309744	0.0183114	0.0154872		0.38729	0.3136	0.0218679
Hippocampal formation	29.4444	31.8876	31.6682	34.3088	23.7226	25.6152	23.2745	27.2062		1.98869	1.81167	0.994346	0.905835		31.8272	24.9546	0.00220097
Hippocampal region	14.8485	16.1419	15.789	16.5455	11.5643	13.0942	11.7659	12.96		0.724409	0.792536	0.362205	0.396268		15.8312	12.3461	0.000635548
Ammon's horn	10.3908	11.2552	11.0686	11.1887	7.96807	9.1331	8.11774	8.78791		0.397581	0.551595	0.19879	0.275797		10.9758	8.5017	0.000342725
Field CA1	6.04663	6.5879	6.51775	6.51253	4.48278	5.39057	4.74045	5.12282		0.248765	0.402148	0.124383	0.201074		6.4162	4.93416	0.000765786
Field CA1, stratum lacunosum-moleculare	1.58341	1.75093	1.76582	1.72087	1.14844	1.50347	1.31384	1.39056		0.0833559	0.14906	0.0416779	0.0745301		1.70526	1.33908	0.00515889
Field CA1, stratum oriens	1.20839	1.29045	1.25304	1.25536	0.93882	0.995797	0.866964	0.973819		0.0336281	0.0563722	0.0168141	0.0281861		1.25181	0.94385	8.31728e-05
Field CA1, pyramidal layer	1.34658	1.45117	1.44267	1.4342	0.997497	1.13654	1.04469	1.14539		0.0485496	0.0719296	0.0242748	0.0359648		1.41866	1.08103	0.000237244
Field CA1, stratum radiatum	1.90825	2.09534	2.05622	2.1021	1.39803	1.75476	1.51495	1.61305		0.0904394	0.151212	0.0452197	0.0756061		2.04048	1.5702	0.0017643
Field CA2	0.436245	0.474087	0.468135	0.441129	0.311665	0.385648	0.33505	0.339724		0.0189821	0.0309554	0.00949105	0.0154777		0.454899	0.343022	0.000838311
Field CA2, stratum lacunosum-moleculare	0.110975	0.122455	0.119479	0.097981	0.0807862	0.0948176	0.0854633	0.0864286		0.0109655	0.00584096	0.00548276	0.00292048		0.112722	0.0868739	0.00593786
Field CA2, stratum oriens	0.118203	0.124156	0.127132	0.119374	0.0863137	0.101621	0.0799358	0.0860007		0.00416769	0.00924695	0.00208384	0.00462347		0.122216	0.0884677	0.000556483
Field CA2, pyramidal layer	0.0756839	0.0833373	0.080361	0.08215	0.0556999	0.0684557	0.0595267	0.0603289		0.00336316	0.00536344	0.00168158	0.00268172		0.0803831	0.0610028	0.000867144
Field CA2, stratum radiatum	0.131384	0.14414	0.141163	0.141623	0.0888648	0.120754	0.110124	0.106966		0.00561689	0.0132591	0.00280845	0.00662954		0.139577	0.106677	0.00381235
Field CA3	3.90792	4.19323	4.08268	4.23501	3.17362	3.35688	3.04224	3.32536		0.146085	0.145495	0.0730424	0.0727473		4.10471	3.22453	0.000141541
Field CA3, stratum lacunosum-moleculare	0.0548496	0.0518732	0.0557	0.0509159	0.0365664	0.0586763	0.0450702	0.0457815		0.00230041	0.00911955	0.0011502	0.00455978		0.0533347	0.0465236	0.197682
Field CA3, stratum lucidum	0.248736	0.270421	0.273823	0.275545	0.209194	0.225776	0.196013	0.222062		0.0124467	0.013517	0.00622335	0.00675849		0.267131	0.213261	0.00108793
Field CA3, stratum oriens	1.35891	1.41503	1.36401	1.38757	1.11357	1.11017	1.00983	1.08592		0.0256741	0.0482935	0.0128371	0.0241467		1.38138	1.07987	3.31146e-05
Field CA3, pyramidal layer	1.12165	1.25856	1.17395	1.25578	0.926065	0.972412	0.891625	1.0012		0.0666675	0.0485993	0.0333337	0.0242996		1.20249	0.947826	0.000830084
Field CA3, stratum radiatum	1.12378	1.19734	1.21519	1.2652	0.888223	0.989844	0.899703	0.970396		0.0585882	0.0505902	0.0292941	0.0252951		1.20038	0.937042	0.000493888
Dentate gyrus	4.39179	4.80678	4.64521	5.28584	3.53503	3.90623	3.58181	4.12033		0.376583	0.277437	0.188292	0.138719		4.7824	3.78585	0.00531488
Dentate gyrus, molecular layer	2.86791	3.12472	3.05499	3.44602	2.28497	2.54307	2.33302	2.69212		0.240861	0.189293	0.120431	0.0946466		3.12341	2.4633	0.00503931
Dentate gyrus, polymorph layer	0.538716	0.564228	0.573157	0.637091	0.431993	0.463883	0.440072	0.488621		0.0418239	0.0255357	0.0209119	0.0127678		0.578298	0.456143	0.00248776
Dentate gyrus, granule cell layer	0.985166	1.11783	1.01706	1.20273	0.818066	0.899279	0.808712	0.93959		0.0990732	0.0635133	0.0495366	0.0317566		1.08069	0.866412	0.0108134
Dentate gyrus, subgranular zone	0	0	0	0	0	0	0	0		0	0	0	0		0	0	#DIV/0!
Dentate gyrus crest	0	0	0	0	0	0	0	0		0	0	0	0		0	0	#DIV/0!
Dentate gyrus crest, molecular layer	0	0	0	0	0	0	0	0		0	0	0	0		0	0	#DIV/0!
Dentate gyrus crest, polymorph layer	0	0	0	0	0	0	0	0		0	0	0	0		0	0	#DIV/0!
Dentate gyrus crest, granule cell layer	0	0	0	0	0	0	0	0		0	0	0	0		0	0	#DIV/0!
Dentate gyrus lateral blade	0	0	0	0	0	0	0	0		0	0	0	0		0	0	#DIV/0!
Dentate gyrus lateral blade, molecular layer	0	0	0	0	0	0	0	0		0	0	0	0		0	0	#DIV/0!
Dentate gyrus lateral blade, polymorph layer	0	0	0	0	0	0	0	0		0	0	0	0		0	0	#DIV/0!
Dentate gyrus lateral blade, granule cell layer	0	0	0	0	0	0	0	0		0	0	0	0		0	0	#DIV/0!
Dentate gyrus medial blade	0	0	0	0	0	0	0	0		0	0	0	0		0	0	#DIV/0!
Dentate gyrus medial blade, molecular layer	0	0	0	0	0	0	0	0		0	0	0	0		0	0	#DIV/0!
Dentate gyrus medial blade, polymorph layer	0	0	0	0	0	0	0	0		0	0	0	0		0	0	#DIV/0!
Dentate gyrus medial blade, granule cell layer	0	0	0	0	0	0	0	0		0	0	0	0		0	0	#DIV/0!
Fasciola cinerea	0.0416687	0.0480465	0.0484717	0.0526274	0.0348656	0.0331649	0.0420939	0.031662		0.00452297	0.00462073	0.00226148	0.00231036		0.0477036	0.0354466	0.00906015
Induseum griseum	0.0242358	0.0318893	0.026787	0.0183982	0.0263618	0.0216847	0.0242359	0.0201096		0.00560934	0.00276133	0.00280467	0.00138067		0.0253276	0.023098	0.502496
Retrohippocampal region	14.5959	15.7457	15.8792	17.7632	12.1583	12.521	11.5086	14.2462		1.31144	1.16933	0.65572	0.584665		15.996	12.6085	0.00840259
Entorhinal area	8.62073	9.17476	9.38906	10.5298	7.50801	7.42808	6.91572	8.36432		0.802327	0.600551	0.401163	0.300276		9.42858	7.55404	0.00961252
Entorhinal area, lateral part	6.1542	6.53007	6.78349	7.33018	5.44329	5.36676	5.05254	5.87672		0.49358	0.339664	0.24679	0.169832		6.69949	5.43483	0.00555237
Entorhinal area, lateral part, layer 1	1.24793	1.30278	1.37592	1.50951	1.17055	1.10124	1.02684	1.213		0.113188	0.0816187	0.056594	0.0408093		1.35904	1.12791	0.0161527
Entorhinal area, lateral part, layer 2	0.0450702	0.0476213	0.0412435	0.0521995	0.0399679	0.0429443	0.0323145	0.0380799		0.00459756	0.00448045	0.00229878	0.00224022		0.0465336	0.0383266	0.0430924
Entorhinal area, lateral part, layer 2/3	0.136911	0.137336	0.149667	0.141195	0.113951	0.105873	0.100345	0.117663		0.0059157	0.00781894	0.00295785	0.00390947		0.141278	0.109458	0.000636053
Entorhinal area, lateral part, layer 2a	0.676053	0.701139	0.738131	0.83562	0.616526	0.587189	0.563377	0.637518		0.0700609	0.0325614	0.0350305	0.0162807		0.737736	0.601153	0.0122816
Entorhinal area, lateral part, layer 2b	0.651817	0.753863	0.75854	0.835192	0.632258	0.609724	0.574007	0.673031		0.0752449	0.0414854	0.0376225	0.0207427		0.749853	0.622255	0.0249563
Entorhinal area, lateral part, layer 3	0.921387	1.01918	1.05107	1.10945	0.846979	0.837201	0.779374	0.899371		0.0787003	0.0491758	0.0393501	0.0245879		1.02527	0.840731	0.00730689
Entorhinal area, lateral part, layer 4	0.392025	0.413285	0.433694	0.45482	0.341003	0.33335	0.329948	0.361545		0.0269559	0.014165	0.013478	0.00708248		0.423456	0.341461	0.00168709
Entorhinal area, lateral part, layer 4/5	0.160722	0.158596	0.15562	0.163444	0.117778	0.12288	0.12288	0.143762		0.00331101	0.0115449	0.0016555	0.00577245		0.159596	0.126825	0.00157693
Entorhinal area, lateral part, layer 5	0.945198	0.94945	0.977513	1.07308	0.760666	0.75769	0.732178	0.860863		0.059599	0.0568003	0.0297995	0.0284001		0.986312	0.777849	0.00230149
Entorhinal area, lateral part, layer 5/6	0	0	0	0	0	0	0	0		0	0	0	0		0	0	#DIV/0!
Entorhinal area, lateral part, layer 6a	0.850806	0.917986	0.961781	1.00848	0.707092	0.749186	0.683281	0.815082		0.0670672	0.0577767	0.0335336	0.0288883		0.934763	0.73866	0.00442032
Entorhinal area, lateral part, layer 6b	0.126282	0.128833	0.140313	0.147185	0.0965182	0.119479	0.107998	0.116807		0.00981587	0.0103567	0.00490793	0.00517835		0.135653	0.110201	0.0118202
Entorhinal area, medial part, dorsal zone	2.27094	2.46398	2.45803	2.9497	1.91251	1.9006	1.71564	2.28865		0.290213	0.240399	0.145106	0.120199		2.53566	1.95435	0.0215217
Entorhinal area, medial part, dorsal zone, layer 1	0.625455	0.674777	0.655219	0.849739	0.536165	0.525961	0.46941	0.612274		0.101018	0.0587443	0.0505088	0.0293722		0.701298	0.535953	0.0299626
Entorhinal area, medial part, dorsal zone, layer 2	0.642463	0.676903	0.676053	0.836048	0.525535	0.53404	0.480465	0.648642		0.0869463	0.0716162	0.0434731	0.0358081		0.707867	0.547171	0.0290602
Entorhinal area, medial part, dorsal zone, layer 2a	0.0127557	0.0148817	0.0144565	0.0188261	0.00595267	0.0093542	0.00935419	0.0149753		0.00256732	0.00373877	0.00128366	0.00186938		0.01523	0.00990908	0.0573395
Entorhinal area, medial part, dorsal zone, layer 2b	0.0110549	0.00977938	0.0114801	0.0124081	0.0102046	0.0119053	0.0102046	0.00941302		0.00109173	0.0010508	0.000545866	0.000525398		0.0111806	0.0104319	0.361176
Entorhinal area, medial part, dorsal zone, layer 3	0.494922	0.563802	0.567204	0.624255	0.443474	0.419663	0.374593	0.518572		0.0529286	0.0602047	0.0264643	0.0301023		0.562546	0.439075	0.0216492
Entorhinal area, medial part, dorsal zone, layer 4	0.0722824	0.0773847	0.0820618	0.0838615	0.0561251	0.0548496	0.0531488	0.0714533		0.00518661	0.00846105	0.0025933	0.00423052		0.0788976	0.0588942	0.00687081
Entorhinal area, medial part, dorsal zone, layer 5	0.145415	0.160722	0.162848	0.201524	0.115227	0.12288	0.107148	0.143762		0.023895	0.0157118	0.0119475	0.00785589		0.167627	0.122254	0.019241
Entorhinal area, medial part, dorsal zone, layer 5/6	0	0	0	0	0	0	0	0		0	0	0	0		0	0	#DIV/0!
Entorhinal area, medial part, dorsal zone, layer 6	0.266594	0.285728	0.288704	0.323038	0.219823	0.22195	0.21132	0.269555		0.0234885	0.0263321	0.0117442	0.013166		0.291016	0.230662	0.0141284
Entorhinal area, medial part, ventral zone	0.195588	0.180706	0.147541	0.249873	0.152218	0.160722	0.147541	0.198957		0.0426543	0.0233772	0.0213271	0.0116886		0.193427	0.16486	0.284644
Entorhinal area, medial part, ventral zone, layer 1	0.0850381	0.0914159	0.0620778	0.113812	0.0744083	0.0748336	0.0680305	0.0894237		0.0212809	0.00905142	0.0106405	0.00452571		0.088086	0.076674	0.361783
Entorhinal area, medial part, ventral zone, layer 2	0.0914159	0.0718572	0.0667549	0.112528	0.0646289	0.0714321	0.0663297	0.0881401		0.0208404	0.0107348	0.0104202	0.0053674		0.0856391	0.0726327	0.309638
Entorhinal area, medial part, ventral zone, layer 3	0.0174328	0.0165824	0.0174328	0.0213932	0.0131809	0.0140313	0.0123305	0.0201096		0.00215948	0.00353325	0.00107974	0.00176663		0.0182103	0.0149131	0.162377
Entorhinal area, medial part, ventral zone, layer 4	0	0	0	0	0	0	0	0		0	0	0	0		0	0	#DIV/0!
Entorhinal area, medial part, ventral zone, layer 5/6	0.00170076	0.000850381	0.00127557	0.00213932	0	0.000425191	0.000850381	0.00128359		0.000554113	0.000552031	0.000277057	0.000276016		0.00149151	0.000639791	0.0722751
Parasubiculum	0.763642	0.868239	0.847405	1.08934	0.607597	0.66925	0.599944	0.840326		0.139013	0.111757	0.0695064	0.0558785		0.892157	0.679279	0.0542485
Parasubiculum, layer 1	0.12288	0.14499	0.147966	0.20238	0.107148	0.125857	0.122455	0.152748		0.0337907	0.0189648	0.0168954	0.00948242		0.154554	0.127052	0.205554
Parasubiculum, layer 2	0.426891	0.474938	0.467284	0.62511	0.334625	0.361837	0.317617	0.474929		0.0869629	0.0708328	0.0434814	0.0354164		0.498556	0.372252	0.065243
Parasubiculum, layer 3	0.213871	0.248311	0.232154	0.261853	0.165824	0.181557	0.159872	0.212649		0.0207148	0.0236252	0.0103574	0.0118126		0.239047	0.179975	0.00939759
Postsubiculum	0.565928	0.65777	0.624605	0.62511	0.466434	0.430718	0.405207	0.543816		0.0382394	0.0603232	0.0191197	0.0301616		0.618353	0.461544	0.00461269
Postsubiculum, layer 1	0.150517	0.178155	0.169226	0.155315	0.122455	0.123305	0.110124	0.147613		0.0126877	0.0156943	0.00634387	0.00784715		0.163303	0.125874	0.00997867
Postsubiculum, layer 2	0.214296	0.255965	0.242359	0.245167	0.17858	0.170076	0.159021	0.207086		0.0177632	0.0205541	0.00888162	0.0102771		0.239446	0.178691	0.0042245
Postsubiculum, layer 3	0.201115	0.22365	0.21302	0.224629	0.165399	0.137337	0.136061	0.189116		0.0109969	0.0253448	0.00549846	0.0126724		0.215604	0.156978	0.00541605
Presubiculum	0.855908	1.00217	0.96986	1.09491	0.697312	0.7798	0.666699	0.90964		0.0986486	0.108587	0.0493243	0.0542937		0.980712	0.763363	0.0251833
Presubiculum, layer 1	0.228327	0.269146	0.262768	0.312769	0.176029	0.209194	0.197288	0.25843		0.034673	0.0349358	0.0173365	0.0174679		0.268252	0.210235	0.056484
Presubiculum, layer 2	0.381396	0.460906	0.446025	0.498035	0.338026	0.363113	0.298909	0.412461		0.0486557	0.0475671	0.0243278	0.0237836		0.44659	0.353127	0.0334186
Presubiculum, layer 3	0.246185	0.272122	0.261067	0.284102	0.183257	0.207493	0.170501	0.238748		0.0161458	0.0300448	0.0080729	0.0150224		0.265869	0.2	0.00833956
Subiculum	3.78972	4.04271	4.04824	4.42412	2.87896	3.21317	2.92106	3.58807		0.261421	0.327501	0.130711	0.16375		4.0762	3.15032	0.00447563
Subiculum, dorsal part	0.957954	1.01578	0.967308	0.994358	0.690084	0.809989	0.689234	0.768872		0.0262943	0.06	0.0131471	0.03		0.98385	0.739545	0.000299506
Subiculum, dorsal part, molecular layer	0.166675	0.186233	0.17773	0.168151	0.109274	0.162848	0.121604	0.140767		0.0091195	0.0233985	0.00455975	0.0116993		0.174697	0.133623	0.0170103
Subiculum, dorsal part, pyramidal layer	0.609298	0.631833	0.605471	0.629389	0.448576	0.50215	0.429017	0.471934		0.0135373	0.031493	0.00676866	0.0157465		0.618998	0.462919	9.85264e-05
Subiculum, dorsal part, stratum radiatum	0.181981	0.197714	0.184107	0.196818	0.132234	0.14499	0.138612	0.15617		0.00826445	0.0102075	0.00413223	0.00510374		0.190155	0.143002	0.000368722
Subiculum, ventral part	2.83177	3.02693	3.08093	3.42976	2.18888	2.40318	2.23183	2.8192		0.249106	0.287592	0.124553	0.143796		3.09235	2.41077	0.0116047
Subiculum, ventral part, molecular layer	0.568054	0.581235	0.594416	0.674315	0.429017	0.476639	0.443474	0.566492		0.047768	0.0617005	0.023884	0.0308503		0.604505	0.478906	0.0181543
Subiculum, ventral part, pyramidal layer	1.90528	2.0592	2.09109	2.30919	1.46733	1.59277	1.48689	1.88004		0.166442	0.190337	0.0832212	0.0951684		2.09119	1.60676	0.00864079
Subiculum, ventral part, stratum radiatum	0.358435	0.386498	0.395427	0.446263	0.292531	0.333775	0.30146	0.37267		0.0366349	0.0363214	0.0183175	0.0181607		0.396656	0.325109	0.0322617
Cortical subplate	5.77451	6.01602	5.89059	6.60709	4.66221	4.63671	4.23065	5.29653		0.370074	0.44023	0.185037	0.220115		6.07205	4.70652	0.00316292
Layer 6b, isocortex	0	0	0	0	0	0	0	0		0	0	0	0		0	0	#DIV/0!
Claustrum	0.86101	0.891199	0.878444	0.93189	0.682005	0.654794	0.596542	0.73935		0.0301579	0.0593504	0.015079	0.0296752		0.890636	0.668173	0.000543812
Endopiriform nucleus	2.13105	2.24586	2.20079	2.41059	1.74923	1.72755	1.55662	1.92282		0.118803	0.149764	0.0594014	0.0748821		2.24707	1.73906	0.00180381
Endopiriform nucleus, dorsal part	1.71352	1.81004	1.76879	1.91298	1.41333	1.38612	1.25006	1.5416		0.0842854	0.119557	0.0421427	0.0597786		1.80133	1.39778	0.00149032
Endopiriform nucleus, ventral part	0.417537	0.43582	0.431994	0.497607	0.3359	0.341428	0.306562	0.381227		0.0354633	0.030714	0.0177317	0.015357		0.445739	0.34128	0.00431446
Lateral amygdalar nucleus	0.504276	0.530212	0.549771	0.590453	0.408183	0.392026	0.386498	0.447546		0.0363269	0.027569	0.0181634	0.0137845		0.543678	0.408563	0.00102968
Basolateral amygdalar nucleus	1.16587	1.20712	1.17183	1.37772	0.930317	0.940522	0.907357	1.08549		0.0997353	0.080911	0.0498677	0.0404555		1.23063	0.965922	0.00619988
Basolateral amygdalar nucleus, anterior part	0.628857	0.642463	0.611849	0.717101	0.528512	0.485143	0.469836	0.56692		0.0464109	0.0439188	0.0232055	0.0219594		0.650067	0.512603	0.00507779
Basolateral amygdalar nucleus, posterior part	0.348231	0.366514	0.37927	0.424442	0.252988	0.281902	0.286153	0.334162		0.0324867	0.0336392	0.0162434	0.0168196		0.379614	0.288801	0.00813503
Basolateral amygdalar nucleus, ventral part	0.188785	0.198139	0.180706	0.236181	0.148817	0.173478	0.151368	0.18441		0.0245423	0.0172763	0.0122711	0.00863815		0.200953	0.164518	0.0513084
Basomedial amygdalar nucleus	0.858884	0.889923	0.866963	0.971681	0.688808	0.71347	0.582936	0.842465		0.0515824	0.106639	0.0257912	0.0533193		0.896863	0.70692	0.0184389
Basomedial amygdalar nucleus, anterior part	0.266169	0.262768	0.251288	0.277684	0.212595	0.207068	0.14414	0.242599		0.0108655	0.0413659	0.00543275	0.020683		0.264477	0.2016	0.0259381
Basomedial amygdalar nucleus, posterior part	0.592715	0.627156	0.615676	0.693997	0.476213	0.506402	0.438797	0.599866		0.043498	0.0688299	0.021749	0.0344149		0.632386	0.50532	0.0205545
Posterior amygdalar nucleus	0.253413	0.251713	0.2228	0.324749	0.203666	0.208344	0.20069	0.258858		0.0433906	0.0274934	0.0216953	0.0137467		0.263169	0.217889	0.128369
Cerebral nuclei	40.2421	41.209	40.6019	44.643	31.5453	30.72	26.8886	35.0524		2.01914	3.35113	1.00957	1.67556		41.674	31.0516	0.00161732
Striatum	33.0228	33.6402	33.1402	36.3107	25.8218	25.062	21.8093	28.3268		1.54487	2.68745	0.772435	1.34372		34.0285	25.255	0.00130621
Striatum dorsal region	19.9134	20.2348	19.91	20.8742	15.3115	14.8349	13.5636	16.3363		0.453765	1.15076	0.226882	0.57538		20.2331	15.0116	0.000150767
Caudoputamen	19.9134	20.2348	19.91	20.8742	15.3115	14.8349	13.5636	16.3363		0.453765	1.15076	0.226882	0.57538		20.2331	15.0116	0.000150767
Striatum ventral region	7.35537	7.5484	7.47102	9.25343	5.89144	6.00667	4.40157	7.12351		0.901082	1.11742	0.450541	0.558712		7.90706	5.8558	0.028879
Nucleus accumbens	3.85988	4.19323	4.08098	4.89007	3.25526	3.18638	2.65914	3.81912		0.444794	0.47451	0.222397	0.237255		4.25604	3.22997	0.0196833
Fundus of striatum	0.314216	0.321019	0.30231	0.338441	0.264468	0.240658	0.187509	0.269982		0.0150937	0.037646	0.00754686	0.018823		0.318996	0.240654	0.00833228
Olfactory tubercle	3.18127	3.03416	3.08773	4.02492	2.37171	2.57963	1.55492	3.03441		0.465918	0.618823	0.232959	0.309412		3.33202	2.38517	0.0501492
Islands of Calleja	0.208768	0.198564	0.189635	0.263993	0.15562	0.164124	0.118628	0.215644		0.0334286	0.0399789	0.0167143	0.0199894		0.21524	0.163504	0.0942979
Major island of Calleja	0.0348656	0.0429442	0.0412435	0.047493	0.0276374	0.0276374	0.0242359	0.0367963		0.00522839	0.00539041	0.00261419	0.00269521		0.0416366	0.0290767	0.0155142
Olfactory tubercle, layers 1-3	0	0	0	0	0	0	0	0		0	0	0	0		0	0	#DIV/0!
Olfactory tubercle, molecular layer	1.06468	0.965607	1.11485	1.32039	0.75939	0.925641	0.527661	0.973391		0.149475	0.201345	0.0747375	0.100672		1.11638	0.796521	0.043427
Olfactory tubercle, pyramidal layer	1.01833	0.995371	0.94945	1.30285	0.774272	0.781076	0.488119	1.00334		0.160147	0.211164	0.0800733	0.105582		1.0665	0.761702	0.0610869
Olfactory tubercle, polymorph layer	0.854633	0.831672	0.792555	1.0902	0.654793	0.681156	0.396278	0.805241		0.134422	0.171747	0.067211	0.0858734		0.892265	0.634367	0.055902
Lateral septal complex	2.87641	2.93084	2.8441	2.92446	2.30156	2.00392	2.02476	2.18895		0.0411661	0.141277	0.0205831	0.0706386		2.89395	2.1298	4.66547e-05
Lateral septal nucleus	2.58813	2.64171	2.55157	2.63394	2.05367	1.80961	1.80621	1.97459		0.0421061	0.123368	0.021053	0.0616842		2.60384	1.91102	4.08492e-05
Lateral septal nucleus, caudal (caudodorsal) part	0.559976	0.521709	0.520433	0.468512	0.454103	0.323145	0.36779	0.324321		0.037551	0.0614597	0.0187755	0.0307299		0.517657	0.36734	0.00585159
Lateral septal nucleus, rostral (rostroventral) part	1.94355	2.02688	1.93802	2.07172	1.53664	1.42737	1.37507	1.57711		0.0653126	0.0938361	0.0326563	0.0469181		1.99504	1.47904	0.000103535
Lateral septal nucleus, ventral part	0.0846129	0.0931167	0.0931167	0.0937024	0.0629282	0.0591015	0.0633534	0.0731648		0.00435828	0.00599813	0.00217914	0.00299906		0.0911372	0.064637	0.000377846
Septofimbrial nucleus	0.221099	0.216847	0.224926	0.217783	0.179005	0.14584	0.16625	0.151892		0.00366146	0.0148801	0.00183073	0.00744007		0.220164	0.160747	0.000241736
Septohippocampal nucleus	0.0671801	0.0722824	0.0676053	0.072737	0.0688808	0.0484718	0.0522984	0.0624682		0.00296522	0.00933897	0.00148261	0.00466949		0.0699512	0.0580298	0.0509315
Striatum-like amygdalar nuclei	3.13025	3.17575	3.16172	3.54657	2.52861	2.40828	1.99925	2.90734		0.196257	0.37407	0.0981286	0.187035		3.25357	2.46087	0.00947531
Anterior amygdalar area	0.481741	0.503425	0.477064	0.545528	0.397128	0.398829	0.207493	0.438989		0.031246	0.103895	0.015623	0.0519473		0.501939	0.36061	0.040371
Bed nucleus of the accessory olfactory tract	0.0544244	0.0493221	0.0578259	0.0671748	0.0433694	0.0425191	0.0195588	0.0470651		0.00752004	0.0125358	0.00376002	0.00626792		0.0571868	0.0381281	0.0402557
Central amygdalar nucleus	0.958804	0.979639	0.99367	1.09961	0.805736	0.741533	0.71347	0.880545		0.0627768	0.0743065	0.0313884	0.0371532		1.00793	0.785321	0.00378268
Central amygdalar nucleus, capsular part	0.381396	0.388624	0.394577	0.420591	0.305287	0.28998	0.268295	0.341008		0.0170693	0.0306048	0.00853466	0.0153024		0.396297	0.301143	0.00161641
Central amygdalar nucleus, lateral part	0.161998	0.161572	0.164124	0.189544	0.141163	0.118203	0.12373	0.151464		0.0135359	0.0153925	0.00676795	0.00769627		0.169309	0.13364	0.0131372
Central amygdalar nucleus, medial part	0.415411	0.429442	0.43497	0.489477	0.359286	0.33335	0.321444	0.388073		0.032495	0.0295933	0.0162475	0.0147967		0.442325	0.350538	0.0058343
Intercalated amygdalar nucleus	0.165824	0.165399	0.164549	0.166867	0.125856	0.126707	0.102046	0.149325		0.000963934	0.0193077	0.000481967	0.00965387		0.16566	0.125983	0.00632328
Medial amygdalar nucleus	1.21689	1.22838	1.222	1.37944	0.945198	0.906932	0.776823	1.16208		0.0786472	0.160027	0.0393236	0.0800134		1.26168	0.947758	0.0125025
Medial amygdalar nucleus, anterodorsal part	0.54807	0.550196	0.561677	0.604573	0.424765	0.403931	0.383522	0.528412		0.0263168	0.0644096	0.0131584	0.0322048		0.566129	0.435158	0.0093467
Medial amygdalar nucleus, anteroventral part	0.326971	0.320594	0.332499	0.369247	0.233004	0.241508	0.136911	0.311913		0.0218286	0.0719118	0.0109143	0.0359559		0.337328	0.230834	0.0297973
Medial amygdalar nucleus, posterodorsal part	0.287429	0.30146	0.26787	0.337157	0.242359	0.219824	0.216847	0.260997		0.0292343	0.0207352	0.0146171	0.0103676		0.298479	0.235007	0.0121914
Medial amygdalar nucleus, posterodorsal part, sublayer a	0.115652	0.121179	0.108424	0.13435	0.0935419	0.0837626	0.0837625	0.106538		0.0109572	0.0107921	0.00547861	0.00539606		0.119901	0.0919013	0.0108198
Medial amygdalar nucleus, posterodorsal part, sublayer b	0.0718572	0.0731327	0.0633534	0.088568	0.0667549	0.0510229	0.0574007	0.0684583		0.0104994	0.00818961	0.00524971	0.00409481		0.0742278	0.0609092	0.09237
Medial amygdalar nucleus, posterodorsal part, sublayer c	0.0999197	0.107148	0.0960931	0.11424	0.0820617	0.0850382	0.0756839	0.0860007		0.00803001	0.004654	0.00401501	0.002327		0.10435	0.0821961	0.0030819
Medial amygdalar nucleus, posteroventral part	0.0544244	0.0561251	0.0599519	0.0684584	0.0450702	0.0416687	0.0395427	0.0607567		0.00625508	0.00960511	0.00312754	0.00480256		0.0597399	0.0467596	0.0641172
Pallidum	7.21931	7.56881	7.46167	8.33224	5.72349	5.65802	5.07933	6.7256		0.480599	0.683636	0.240299	0.341818		7.64551	5.79661	0.00444701
Pallidum, dorsal region	1.46818	1.50645	1.50092	1.68322	1.12633	1.10039	1.18756	1.35462		0.0971633	0.114264	0.0485816	0.0571319		1.53969	1.19222	0.00356561
Globus pallidus, external segment	1.2305	1.26324	1.24836	1.40254	0.944773	0.920113	0.981765	1.12657		0.0787329	0.0923838	0.0393665	0.0461919		1.28616	0.993304	0.00292408
Globus pallidus, internal segment	0.237681	0.243209	0.252563	0.280679	0.181556	0.180281	0.205792	0.228052		0.0191113	0.0226921	0.00955564	0.0113461		0.253533	0.19892	0.0103106
Pallidum, ventral region	2.94784	3.07455	2.96911	3.45287	2.37256	2.36916	1.83427	2.80337		0.23449	0.396773	0.117245	0.198387		3.11109	2.34484	0.0159026
Substantia innominata	2.64681	2.73865	2.66254	3.1063	2.12723	2.11235	1.70374	2.50557		0.215578	0.327521	0.107789	0.16376		2.78858	2.11222	0.0136349
Magnocellular nucleus	0.301035	0.3359	0.306562	0.34657	0.245335	0.256815	0.130533	0.297794		0.022164	0.0716853	0.011082	0.0358426		0.322517	0.232619	0.0535714
Pallidum, medial region	1.58171	1.69268	1.67355	1.78591	1.26154	1.25644	1.16205	1.49924		0.0837302	0.143754	0.0418651	0.0718771		1.68346	1.29482	0.00342314
Medial septal complex	1.45543	1.55492	1.53281	1.6584	1.14759	1.1697	1.06	1.39441		0.0836951	0.142431	0.0418475	0.0712156		1.55039	1.19292	0.00494139
Medial septal nucleus	0.531063	0.551472	0.585062	0.596016	0.400529	0.412435	0.371617	0.470651		0.0299775	0.041591	0.0149887	0.0207955		0.565903	0.413808	0.00102274
Diagonal band nucleus	0.924364	1.00345	0.94775	1.06239	0.74706	0.757265	0.688383	0.923759		0.0616242	0.101093	0.0308121	0.0505463		0.984488	0.779117	0.0133157
Triangular nucleus of septum	0.126282	0.137762	0.140738	0.127504	0.113951	0.0867389	0.102046	0.104827		0.00725438	0.0113089	0.00362719	0.00565444		0.133071	0.101891	0.00353502
Pallidum, caudal region	1.22157	1.29513	1.31809	1.41024	0.963056	0.932018	0.895451	1.06838		0.0777781	0.0744203	0.0388891	0.0372102		1.31126	0.964726	0.000664185
Bed nuclei of the stria terminalis	1.21307	1.2828	1.30619	1.39527	0.956253	0.92394	0.889499	1.0611		0.0752004	0.0741296	0.0376002	0.0370648		1.29933	0.957699	0.000646702
Bed nuclei of the stria terminalis, anterior division	0.745784	0.787453	0.809138	0.891242	0.607172	0.571031	0.541268	0.661906		0.0611637	0.0519159	0.0305818	0.025958		0.808404	0.595344	0.00180986
Bed nuclei of the stria terminalis, anterior division, anterolateral area	0.223225	0.227902	0.221949	0.279824	0.184958	0.181982	0.146266	0.19425		0.0278502	0.0210575	0.0139251	0.0105287		0.238225	0.176864	0.0125963
Bed nuclei of the stria terminalis, anterior division, anteromedial area	0.263193	0.278075	0.292531	0.300789	0.208768	0.197714	0.191336	0.239604		0.016555	0.0214131	0.00827748	0.0107065		0.283647	0.209356	0.00152967
Bed nuclei of the stria terminalis, anterior division, dorsomedial nucleus	0.0284878	0.0318893	0.0327397	0.0338013	0.026787	0.0212595	0.0204091	0.0256719		0.00229836	0.00316703	0.00114918	0.00158352		0.0317295	0.0235319	0.00575048
Bed nuclei of the stria terminalis, anterior division, fusiform nucleus	0.0170076	0.0221099	0.0221099	0.0141195	0.0114801	0.0119053	0.0140313	0.0136917		0.00395916	0.00127167	0.00197958	0.000635837		0.0188367	0.0127771	0.0268255
Bed nuclei of the stria terminalis, anterior division, juxtacapsular nucleus	0.0102046	0.00722824	0.0127557	0.0145474	0.0106298	0.00722825	0.00722824	0.0102687		0.00318277	0.00186548	0.00159139	0.000932741		0.011184	0.00883875	0.250643
Bed nuclei of the stria terminalis, anterior division, magnocellular nucleus	0.0569755	0.0578259	0.0544244	0.0616125	0.0442198	0.0399679	0.0386923	0.0457815		0.00297646	0.00337578	0.00148823	0.00168789		0.0577096	0.0421654	0.000455085
Bed nuclei of the stria terminalis, anterior division, oval nucleus	0.0586763	0.0574007	0.064629	0.0684584	0.0459206	0.0471962	0.0488969	0.0479208		0.00517957	0.00125357	0.00258978	0.000626784		0.0622911	0.0474836	0.00143649
Bed nuclei of the stria terminalis, anterior division, rhomboid nucleus	0.0378419	0.0391175	0.0488969	0.0517716	0.0272122	0.0233855	0.0323145	0.0359406		0.00696362	0.005533	0.00348181	0.0027665		0.044407	0.0297132	0.0163233
Bed nuclei of the stria terminalis, anterior division, ventral nucleus	0.0501725	0.0659045	0.0591015	0.066319	0.0471961	0.0403931	0.0420939	0.0487765		0.00756353	0.0040067	0.00378176	0.00200335		0.0603744	0.0446149	0.0103007
Bed nuclei of the stria terminalis, posterior division	0.467284	0.495347	0.497048	0.504025	0.349081	0.352908	0.348231	0.399197		0.0162022	0.024646	0.00810109	0.012323		0.490926	0.362355	0.000125899
Bed nuclei of the stria terminalis, posterior division, dorsal nucleus	0.00255114	0.00297633	0.00340152	0.00427865	0.00212595	0.00297634	0.00255114	0.00256719		0.000737923	0.000347261	0.000368962	0.00017363		0.00330191	0.00255515	0.116778
Bed nuclei of the stria terminalis, posterior division, principal nucleus	0.252988	0.247886	0.272122	0.246878	0.181556	0.186659	0.185383	0.211793		0.0117442	0.0138014	0.0058721	0.00690072		0.254969	0.191348	0.000416527
Bed nuclei of the stria terminalis, posterior division, interfascicular nucleus	0.164549	0.188785	0.169226	0.1904	0.129258	0.125857	0.12203	0.142051		0.0132634	0.00868541	0.00663172	0.00434271		0.17824	0.129799	0.000876041
Bed nuclei of the stria terminalis, posterior division, transverse nucleus	0.0301885	0.0314641	0.0276374	0.0389357	0.0199839	0.0212595	0.0208343	0.0256719		0.00485429	0.00254548	0.00242714	0.00127274		0.0320564	0.0219374	0.0101814
Bed nuclei of the stria terminalis, posterior division, strial extension	0.0170076	0.0242359	0.024661	0.0235326	0.0161572	0.0161573	0.0174328	0.0171146		0.00359799	0.000657545	0.00179899	0.000328772		0.0223593	0.0167155	0.0214951
Bed nucleus of the anterior commissure	0.00850381	0.0123305	0.0119053	0.0149753	0.00680305	0.00807863	0.00595267	0.00727369		0.00265666	0.00088903	0.00132833	0.000444515		0.0119287	0.00702701	0.0128357
Brain stem	63.1097	70.9821	55.7786	75.0466	53.3916	49.09	47.5627	59.4654		8.54953	5.33097	4.27476	2.66548		66.2293	52.3774	0.0333076
Interbrain	21.2174	23.4837	22.6172	24.6236	17.6233	17.8453	15.7478	19.3925		1.43683	1.49373	0.718413	0.746863		22.9855	17.6522	0.00212263
Thalamus	14.4148	15.9608	15.1946	16.3615	12.1804	12.2344	11.0681	12.379		0.861076	0.604083	0.430538	0.302041		15.4829	11.9655	0.000541673
Thalamus, sensory-motor cortex related	4.4088	4.90159	4.76256	5.19556	3.6256	3.69278	3.56607	4.06214		0.326628	0.223084	0.163314	0.111542		4.81713	3.73665	0.00156772
Ventral group of the dorsal thalamus	2.99759	3.29267	3.22677	3.49523	2.38319	2.46058	2.4053	2.68784		0.205077	0.13959	0.102538	0.069795		3.25307	2.48423	0.000812639
Ventral anterior-lateral complex of the thalamus	0.838901	0.95923	0.914585	0.999492	0.665848	0.693486	0.661171	0.734643		0.0688115	0.0337327	0.0344058	0.0168663		0.928052	0.688787	0.000781534
Ventral medial nucleus of the thalamus	0.519157	0.579534	0.560401	0.609707	0.410309	0.443049	0.409458	0.465944		0.037918	0.027403	0.018959	0.0137015		0.5672	0.43219	0.00118112
Ventral posterior complex of the thalamus	1.63953	1.75391	1.75178	1.88603	1.30704	1.32404	1.33467	1.48726		0.100798	0.0834494	0.0503989	0.0417247		1.75781	1.36325	0.00093932
Ventral posterolateral nucleus of the thalamus	0.604621	0.633108	0.642038	0.685012	0.477914	0.483442	0.511504	0.552373		0.033285	0.0340492	0.0166425	0.0170246		0.641195	0.506308	0.00130026
Ventral posterolateral nucleus of the thalamus, parvicellular part	0.0569755	0.060377	0.0629282	0.0744485	0.0429442	0.0450702	0.0454954	0.0436422		0.00758035	0.00119617	0.00379017	0.000598087		0.0636823	0.044288	0.00232339
Ventral posteromedial nucleus of the thalamus	0.855058	0.926065	0.930742	0.980666	0.692635	0.697738	0.687108	0.78941		0.0516746	0.048652	0.0258373	0.024326		0.923133	0.716723	0.00113454
Ventral posteromedial nucleus of the thalamus, parvicellular part	0.12288	0.13436	0.116077	0.145902	0.0935419	0.0977939	0.0905656	0.101832		0.0131183	0.00492559	0.00655917	0.0024628		0.129805	0.0959333	0.00289713
Subparafascicular nucleus	0.260216	0.282752	0.264894	0.296938	0.206643	0.208769	0.205792	0.245594		0.0168948	0.0193038	0.00844739	0.0096519		0.2762	0.216699	0.00354455
Subparafascicular nucleus, magnocellular part	0.0544244	0.0756839	0.0637786	0.0676026	0.0569755	0.046771	0.0484717	0.0637518		0.00882611	0.00789032	0.00441305	0.00394516		0.0653724	0.0539925	0.102913
Subparafascicular nucleus, parvicellular part	0.205792	0.207068	0.201115	0.229336	0.149667	0.161998	0.157321	0.181842		0.0126012	0.0137322	0.00630059	0.0068661		0.210828	0.162707	0.00208696
Subparafascicular area	0.0471961	0.0518732	0.0561251	0.0628961	0.0386923	0.0505977	0.0416687	0.0427864		0.00666784	0.00507733	0.00333392	0.00253867		0.0545227	0.0434363	0.0382515
Peripeduncular nucleus	0.0744083	0.098219	0.0931167	0.10012	0.087164	0.0765344	0.0710068	0.0932744		0.01175	0.0100748	0.00587502	0.00503739		0.0914661	0.0819949	0.266889
Geniculate group, dorsal thalamus	1.02939	1.17608	1.12165	1.24038	0.909907	0.896302	0.842302	0.992645		0.0893229	0.0621839	0.0446615	0.0310919		1.14187	0.910289	0.00534689
Medial geniculate complex	0.573582	0.650541	0.65947	0.704693	0.51363	0.499174	0.492371	0.577189		0.0544267	0.0387594	0.0272133	0.0193797		0.647072	0.520591	0.00911741
Medial geniculate complex, dorsal part	0.151368	0.184958	0.170927	0.180559	0.125006	0.122455	0.119904	0.142479		0.0149219	0.0102264	0.00746097	0.00511318		0.171953	0.127461	0.0026595
Medial geniculate complex, ventral part	0.301035	0.340152	0.355034	0.389785	0.283602	0.280626	0.271697	0.31662		0.0367595	0.0196513	0.0183798	0.00982566		0.346501	0.288136	0.0311447
Medial geniculate complex, medial part	0.121179	0.125431	0.13351	0.13435	0.105022	0.0960931	0.10077	0.118091		0.00638413	0.00946198	0.00319207	0.00473099		0.128617	0.104994	0.00608353
Dorsal part of the lateral geniculate complex	0.455804	0.525535	0.462182	0.535687	0.396277	0.397128	0.349932	0.415456		0.0416373	0.0279484	0.0208187	0.0139742		0.494802	0.389698	0.00573796
Thalamus, polymodal association cortex related	8.24614	9.1467	8.5442	9.2038	7.08792	7.04456	6.12529	6.81887		0.467108	0.445156	0.233554	0.222578		8.78521	6.76916	0.000778504
Lateral group of the dorsal thalamus	1.60084	1.71692	1.62295	1.8227	1.38059	1.3959	1.16587	1.29557		0.101286	0.105423	0.0506431	0.0527117		1.69085	1.30949	0.00198143
Lateral posterior nucleus of the thalamus	0.650116	0.686682	0.638211	0.702554	0.575708	0.569756	0.471536	0.508303		0.0302352	0.0501713	0.0151176	0.0250856		0.669391	0.531326	0.00327852
Posterior complex of the thalamus	0.794681	0.848255	0.806586	0.914347	0.672226	0.684557	0.565078	0.621259		0.0540438	0.0545195	0.0270219	0.0272598		0.840967	0.63578	0.00175169
Posterior limiting nucleus of the thalamus	0.0884396	0.10077	0.102471	0.121514	0.0769595	0.0880145	0.0752587	0.0958416		0.0136584	0.00970082	0.00682919	0.00485041		0.103299	0.0840186	0.0609585
Suprageniculate nucleus	0.0676053	0.0812114	0.0756839	0.0842894	0.0556999	0.0535741	0.0539992	0.0701698		0.0073191	0.00792608	0.00365955	0.00396304		0.0771975	0.0583607	0.0129518
Anterior group of the dorsal thalamus	1.51283	1.68248	1.55705	1.66996	1.2947	1.2237	1.03619	1.18604		0.0836982	0.109054	0.0418491	0.054527		1.60558	1.18516	0.000871758
Anteroventral nucleus of thalamus	0.271697	0.295933	0.273397	0.297366	0.215146	0.207493	0.169651	0.203663		0.013945	0.0201325	0.00697251	0.0100662		0.284598	0.198988	0.000426355
Anteromedial nucleus	0.351632	0.394151	0.362262	0.371815	0.2802	0.279776	0.239807	0.275117		0.0181091	0.0194155	0.00905457	0.00970773		0.369965	0.268725	0.00026505
Anteromedial nucleus, dorsal part	0.277224	0.310814	0.284878	0.294371	0.224075	0.221524	0.187934	0.222062		0.0144744	0.0173446	0.00723719	0.00867229		0.291822	0.213899	0.000458305
Anteromedial nucleus, ventral part	0.0744083	0.0833373	0.0773847	0.0774435	0.0561251	0.0582512	0.0518732	0.0530552		0.00374135	0.00290253	0.00187068	0.00145126		0.0781435	0.0548262	6.31862e-05
Anterodorsal nucleus	0.107998	0.142014	0.12373	0.130927	0.113101	0.0829122	0.0790854	0.0907072		0.0142572	0.0152215	0.00712861	0.00761073		0.126167	0.0914514	0.0158235
Interanteromedial nucleus of the thalamus	0.0391175	0.0352908	0.0331649	0.0393636	0.0276374	0.0352908	0.0216847	0.0320898		0.00302309	0.00589826	0.00151155	0.00294913		0.0367342	0.0291757	0.0627288
Interanterodorsal nucleus of the thalamus	0.0629282	0.0705816	0.0608022	0.0718813	0.0484717	0.0510229	0.0420939	0.0492044		0.00550245	0.00388712	0.00275122	0.00194356		0.0665483	0.0476982	0.00138593
Lateral dorsal nucleus of thalamus	0.679454	0.744508	0.70369	0.758604	0.610148	0.567205	0.483867	0.535258		0.0364744	0.0532341	0.0182372	0.0266171		0.721564	0.54912	0.00175367
Medial group of the dorsal thalamus	1.22285	1.39803	1.23433	1.38115	1.1174	1.11825	0.884822	0.98965		0.0933257	0.112706	0.0466628	0.0563529		1.30909	1.02753	0.00847716
Intermediodorsal nucleus of the thalamus	0.142014	0.171777	0.131809	0.179703	0.124156	0.148817	0.104172	0.127931		0.0230301	0.0182932	0.011515	0.00914661		0.156326	0.126269	0.0869742
Mediodorsal nucleus of thalamus	0.883546	1.01025	0.893325	0.974248	0.838475	0.795532	0.630558	0.704693		0.0618425	0.0930664	0.0309213	0.0465332		0.940343	0.742314	0.0121534
Mediodorsal nucleus of the thalamus, central part	0.15562	0.170076	0.151368	0.161305	0.135211	0.151368	0.112675	0.121086		0.00808844	0.0169638	0.00404422	0.00848192		0.159592	0.130085	0.0200638
Mediodorsal nucleus of the thalamus, lateral part	0.341853	0.385222	0.336751	0.40476	0.306137	0.304011	0.231304	0.255007		0.0331923	0.0370456	0.0165961	0.0185228		0.367147	0.274115	0.00961459
Mediodorsal nucleus of the thalamus, medial part	0.386073	0.454954	0.405207	0.408183	0.397128	0.340153	0.286578	0.3286		0.0292556	0.0455822	0.0146278	0.0227911		0.413604	0.338115	0.0316824
Submedial nucleus of the thalamus	0.178155	0.196863	0.186233	0.206231	0.139462	0.156045	0.132234	0.140767		0.0122616	0.0100088	0.00613082	0.00500439		0.191871	0.142127	0.000754732
Perireunensis nucleus	0.0191336	0.0191336	0.0229603	0.0209654	0.0153069	0.017858	0.017858	0.0162588		0.00182525	0.00125955	0.000912623	0.000629777		0.0205482	0.0168204	0.0151939
Midline group of the dorsal thalamus	1.13398	1.24241	1.19946	1.18861	0.93712	0.937971	0.845704	0.9336		0.0446127	0.0453027	0.0223063	0.0226513		1.19111	0.913599	0.000124996
Paraventricular nucleus of the thalamus	0.474087	0.522984	0.502575	0.515577	0.391175	0.3899	0.372892	0.372242		0.0215336	0.0103917	0.0107668	0.00519587		0.503806	0.381552	5.09768e-05
Parataenial nucleus	0.110124	0.12203	0.124156	0.110389	0.0977938	0.0939672	0.0850381	0.0872843		0.00746226	0.00589656	0.00373113	0.00294828		0.116675	0.0910209	0.00167226
Nucleus of reunions	0.549771	0.597392	0.572732	0.562642	0.448151	0.454104	0.387774	0.474074		0.0201622	0.037192	0.0100811	0.018596		0.570634	0.441026	0.000863705
Intralaminar nuclei of the dorsal thalamus	1.24198	1.37974	1.27047	1.38799	1.07276	1.09189	0.907782	0.99778		0.0746828	0.0836939	0.0373414	0.041847		1.32005	1.01755	0.00167416
Rhomboid nucleus	0.164974	0.187934	0.1671	0.161733	0.14499	0.143715	0.11055	0.135205		0.0118729	0.0159785	0.00593643	0.00798923		0.170435	0.133615	0.0100967
Central medial nucleus of the thalamus	0.278925	0.311239	0.289555	0.308063	0.25639	0.267445	0.19984	0.244311		0.0153544	0.02965	0.0076772	0.014825		0.296945	0.241996	0.0165853
Paracentral nucleus	0.156895	0.169651	0.147116	0.165156	0.134785	0.126282	0.104172	0.112528		0.00991654	0.0137014	0.00495827	0.00685068		0.159704	0.119442	0.00312309
Central lateral nucleus of the thalamus	0.220249	0.233855	0.210894	0.25458	0.179005	0.190911	0.161998	0.155315		0.0189656	0.0161759	0.00948279	0.00808797		0.229894	0.171807	0.0034652
Parafascicular nucleus	0.420938	0.477064	0.455804	0.498462	0.357585	0.363538	0.331223	0.350421		0.033047	0.0140433	0.0165235	0.00702163		0.463067	0.350692	0.000771681
Reticular nucleus of the thalamus	1.03746	1.13909	1.13653	1.21556	0.841877	0.819343	0.867814	1.00206		0.0730081	0.0819525	0.0365041	0.0409763		1.13216	0.882773	0.00391488
Geniculate group, ventral thalamus	0.0854633	0.0977938	0.0956679	0.0889959	0.071432	0.0710069	0.073558	0.0834336		0.00573798	0.0058252	0.00286899	0.0029126		0.0919802	0.0748576	0.00576091
Intergeniculate leaflet of the lateral geniculate complex	0.0680305	0.0795106	0.0790854	0.0753042	0.0552748	0.0569756	0.0582511	0.0637518		0.00531575	0.00366757	0.00265787	0.00183379		0.0754827	0.0585633	0.00193903
Ventral part of the lateral geniculate complex	0.298484	0.345255	0.327397	0.314908	0.287004	0.251713	0.241508	0.288381		0.0197674	0.024088	0.00988371	0.012044		0.321511	0.267151	0.0129994
Ventral part of the lateral geniculate complex, lateral zone	0	0	0	0	0	0	0	0		0	0	0	0		0	0	#DIV/0!
Ventral part of the lateral geniculate complex, medial zone	0	0	0	0	0	0	0	0		0	0	0	0		0	0	#DIV/0!
Subgeniculate nucleus	0.0174328	0.0182832	0.0165824	0.0136917	0.0161572	0.0140313	0.0153069	0.0196818		0.00199527	0.00242142	0.000997637	0.00121071		0.0164975	0.0162943	0.901157
Epithalamus	0.410734	0.490245	0.427742	0.44883	0.372042	0.386499	0.343554	0.330739		0.0343135	0.0255669	0.0171568	0.0127835		0.444388	0.358208	0.00689672
Medial habenula	0.164974	0.196863	0.148817	0.18441	0.149242	0.153494	0.137762	0.141623		0.021186	0.00713702	0.010593	0.00356851		0.173766	0.14553	0.04492
Lateral habenula	0.24576	0.293381	0.278925	0.26442	0.2228	0.233005	0.205792	0.189116		0.0203593	0.0193063	0.0101797	0.00965315		0.270622	0.212678	0.00614487
Pineal body	0	0	0	0	0	0	0	0		0	0	0	0		0	0	#DIV/0!
Hypothalamus	9.69221	10.6608	10.6043	11.6401	7.83626	8.0714	6.78477	9.68		0.795777	1.19672	0.397889	0.598362		10.6493	8.09311	0.0119654
Periventricular zone	0.511504	0.551472	0.582936	0.564354	0.406907	0.420089	0.32442	0.491616		0.0302687	0.0685422	0.0151344	0.0342711		0.552566	0.410758	0.00912476
Supraoptic nucleus	0.0225351	0.0301885	0.0352908	0.0320899	0.0216847	0.017858	0.0191336	0.0265276		0.00541965	0.00383042	0.00270983	0.00191521		0.0300261	0.021301	0.0390921
Accessory supraoptic group	0.00127557	0.00127557	0.00212595	0.00128359	0.00170076	0.00127557	0.000850381	0.00128359		0.00042387	0.00034719	0.000211935	0.000173595		0.00149017	0.00127758	0.467214
Nucleus circularis	0.00127557	0.00127557	0.00212595	0.00128359	0.00170076	0.00127557	0.000850381	0.00128359		0.00042387	0.00034719	0.000211935	0.000173595		0.00149017	0.00127758	0.467214
Paraventricular hypothalamic nucleus	0.211745	0.216422	0.210469	0.22035	0.173052	0.161998	0.149667	0.169862		0.00452825	0.0104123	0.00226412	0.00520617		0.214747	0.163645	0.000105189
Paraventricular hypothalamic nucleus, magnocellular division	0.0327397	0.0361412	0.0361412	0.0367964	0.0310389	0.0314641	0.0293381	0.0338013		0.00183613	0.00183952	0.000918063	0.000919758		0.0354546	0.0314106	0.0207993
Paraventricular hypothalamic nucleus, magnocellular division, anterior magnocellular part	0	0	0	0	0	0	0	0		0	0	0	0		0	0	#DIV/0!
Paraventricular hypothalamic nucleus, magnocellular division, medial magnocellular part	0.008929	0.00935419	0.00637786	0.00984089	0.00722824	0.00680305	0.00850381	0.00641797		0.00154404	0.000906276	0.000772019	0.000453138		0.00862548	0.00723827	0.172201
Paraventricular hypothalamic nucleus, magnocellular division, posterior magnocellular part	0.0238107	0.026787	0.0297633	0.0269555	0.0238107	0.0246611	0.0208343	0.0273833		0.00243163	0.00269706	0.00121581	0.00134853		0.0268291	0.0241723	0.193733
Paraventricular hypothalamic nucleus, magnocellular division, posterior magnocellular part, lateral zone	0.0199839	0.0229603	0.0250862	0.0196818	0.0212595	0.0204092	0.0174328	0.0218211		0.00257326	0.00195344	0.00128663	0.000976721		0.0219281	0.0202306	0.333821
Paraventricular hypothalamic nucleus, magnocellular division, posterior magnocellular part, medial zone	0.00382671	0.00382671	0.0046771	0.0072737	0.00255114	0.00425191	0.00340152	0.00556224		0.00163177	0.00128424	0.000815886	0.000642119		0.00490106	0.0039417	0.391133
Paraventricular hypothalamic nucleus, parvicellular division	0.179005	0.180281	0.174328	0.183554	0.142014	0.130534	0.120329	0.136061		0.00382382	0.00921787	0.00191191	0.00460894		0.179292	0.132234	8.08184e-05
Paraventricular hypothalamic nucleus, parvicellular division, anterior parvicellular part	0.0752587	0.069306	0.0693061	0.0723092	0.0556999	0.0522985	0.0497473	0.056906		0.00285197	0.00325887	0.00142599	0.00162943		0.071545	0.0536629	0.00017048
Paraventricular hypothalamic nucleus, parvicellular division, medial parvicellular part, dorsal zone	0.069306	0.0620778	0.0629282	0.0676026	0.060377	0.0412435	0.0416687	0.0466372		0.00352282	0.00893885	0.00176141	0.00446942		0.0654787	0.0474816	0.00955162
Paraventricular hypothalamic nucleus, parvicellular division, periventricular part	0.0344404	0.0488969	0.0420939	0.0436422	0.0259366	0.0369916	0.028913	0.0325177		0.00597584	0.0047667	0.00298792	0.00238335		0.0422683	0.0310897	0.0264663
Periventricular hypothalamic nucleus, anterior part	0.0127557	0.0140313	0.0144565	0.00984089	0.00935419	0.0093542	0.0140313	0.0115523		0.00208286	0.00222784	0.00104143	0.00111392		0.0127711	0.011073	0.308081
Periventricular hypothalamic nucleus, intermediate part	0.096093	0.0875892	0.0990694	0.094986	0.0676053	0.0854634	0.0829122	0.0924187		0.00487835	0.0104649	0.00243917	0.00523247		0.0944344	0.0820999	0.0765125
Arcuate hypothalamic nucleus	0.1671	0.201965	0.221524	0.205803	0.13351	0.14414	0.0578259	0.189972		0.0229492	0.0548043	0.0114746	0.0274022		0.199098	0.131362	0.0627915
Periventricular region	1.65271	1.8381	1.80834	1.93523	1.38229	1.34786	1.11442	1.64172		0.117198	0.215855	0.058599	0.107927		1.8086	1.37157	0.0119481
Anterodorsal preoptic nucleus	0.0238107	0.026787	0.0314641	0.0265276	0.0242359	0.0242359	0.0204091	0.0243883		0.00317709	0.00194009	0.00158855	0.000970046		0.0271473	0.0233173	0.085325
Anterior hypothalamic area	0	0	0	0	0	0	0	0		0	0	0	0		0	0	#DIV/0!
Anteroventral preoptic nucleus	0.0493221	0.0505977	0.0522984	0.0590453	0.0412435	0.0416687	0.0369916	0.0539109		0.00432824	0.00728431	0.00216412	0.00364216		0.0528159	0.0434537	0.0691581
Anteroventral periventricular nucleus	0.0539992	0.0688808	0.0591015	0.0774435	0.0531488	0.0463458	0.0395427	0.0551945		0.0104184	0.00710135	0.00520921	0.00355068		0.0648563	0.048558	0.041473
Dorsomedial nucleus of the hypothalamus	0.340577	0.391175	0.383097	0.425725	0.298058	0.290405	0.236831	0.361973		0.0349933	0.0512715	0.0174967	0.0256357		0.385144	0.296817	0.0293425
Dorsomedial nucleus of the hypothalamus, anterior part	0.199414	0.226201	0.224501	0.233614	0.192186	0.16625	0.15647	0.212649		0.0148812	0.0254486	0.0074406	0.0127243		0.220933	0.181889	0.0380881
Dorsomedial nucleus of the hypothalamus, posterior part	0.0591015	0.0727076	0.0642038	0.0795829	0.042519	0.0514481	0.0420939	0.0607567		0.00906802	0.00882694	0.00453401	0.00441347		0.0688989	0.0492044	0.0207806
Dorsomedial nucleus of the hypothalamus, ventral part	0.0820617	0.0922663	0.0943923	0.112528	0.0633534	0.0727076	0.0382671	0.0885679		0.0126767	0.0210564	0.00633836	0.0105282		0.0953122	0.065724	0.052738
Median preoptic nucleus	0.119478	0.133935	0.140313	0.138628	0.0973686	0.0943924	0.0965183	0.112956		0.00946623	0.00852396	0.00473312	0.00426198		0.133089	0.100309	0.00212229
Medial preoptic area	0.64884	0.71432	0.705391	0.723947	0.532338	0.52341	0.471962	0.621687		0.0337186	0.0622035	0.0168593	0.0311017		0.698125	0.537349	0.00391416
Vascular organ of the lamina terminalis	0.00637786	0.00807862	0.00807862	0.00770157	0.00765343	0.00425191	0.00680305	0.00941302		0.000807349	0.00214761	0.000403674	0.00107381		0.00755916	0.00703035	0.661056
Posterodorsal preoptic nucleus	0.00382671	0.00340152	0.00255114	0.00427865	0.00297633	0.00170076	0.00170076	0.00513437		0.00073535	0.00161994	0.000367675	0.000809972		0.00351451	0.00287806	0.501182
Parastrial nucleus	0.0195588	0.0182832	0.0208343	0.0218211	0.0165824	0.0119053	0.0144565	0.0149753		0.00153762	0.00194035	0.00076881	0.000970175		0.0201243	0.0144799	0.00385155
Suprachiasmatic preoptic nucleus	0	0	0	0	0	0	0	0		0	0	0	0		0	0	#DIV/0!
Periventricular hypothalamic nucleus, posterior part	0.102046	0.106298	0.108424	0.130927	0.0718572	0.0807863	0.019984	0.107394		0.0129433	0.0366047	0.00647167	0.0183023		0.111923	0.0700053	0.0741489
Periventricular hypothalamic nucleus, preoptic part	0.0761091	0.0761091	0.0782351	0.072737	0.0569755	0.0574008	0.044645	0.0641797		0.0022732	0.00813627	0.0011366	0.00406814		0.0757976	0.0558002	0.00321028
Subparaventricular zone	0.106298	0.120754	0.113101	0.125364	0.0939671	0.0892901	0.0637786	0.10226		0.00841152	0.0165877	0.00420576	0.00829385		0.116379	0.0873238	0.0204679
Suprachiasmatic nucleus	0.0659045	0.0829121	0.0727076	0.0868566	0.0616526	0.0544244	0.0365664	0.0800106		0.00954993	0.0179804	0.00477497	0.00899021		0.0770952	0.0581635	0.11226
Subfornical organ	0.0136061	0.0136061	0.00765343	0.0132638	0.00680305	0.00850382	0.00977938	0.00684583		0.00292374	0.0014357	0.00146187	0.000717849		0.0120324	0.00798302	0.0473943
Ventrolateral preoptic nucleus	0.0229603	0.0229603	0.0250862	0.0209654	0.0174328	0.0191336	0.0144565	0.0213932		0.00168276	0.00292312	0.000841381	0.00146156		0.022993	0.018104	0.0273695
Hypothalamic medial zone	1.97884	2.2399	2.24288	2.58216	1.65569	1.72755	1.52261	2.07643		0.247343	0.236348	0.123672	0.118174		2.26095	1.74557	0.0236111
Anterior hypothalamic nucleus	0.586763	0.635234	0.601219	0.658912	0.478339	0.469836	0.433694	0.568632		0.0326727	0.0573681	0.0163364	0.028684		0.620532	0.487625	0.00690942
Anterior hypothalamic nucleus, anterior part	0.170501	0.196013	0.176029	0.189972	0.139462	0.136486	0.120754	0.170718		0.01187	0.0209194	0.00593498	0.0104597		0.183129	0.141855	0.0139374
Anterior hypothalamic nucleus, central part	0.326121	0.347381	0.3359	0.36668	0.271697	0.263618	0.244485	0.312341		0.0174268	0.0285806	0.00871338	0.0142903		0.344021	0.273035	0.00543281
Anterior hypothalamic nucleus, dorsal part	0	0	0	0	0	0	0	0		0	0	0	0		0	0	#DIV/0!
Anterior hypothalamic nucleus, posterior part	0.0901404	0.0918411	0.08929	0.10226	0.0671801	0.0697313	0.0684557	0.0855729		0.00601222	0.00862173	0.00300611	0.00431087		0.0933828	0.072735	0.00772339
Mammillary body	0.232154	0.283177	0.297633	0.367108	0.204517	0.228328	0.210895	0.287525		0.0556654	0.0378357	0.0278327	0.0189178		0.295018	0.232816	0.114055
Lateral mammillary nucleus	0.0386923	0.0522984	0.0548496	0.0641797	0.035716	0.0365664	0.0331649	0.0517716		0.0105298	0.00843599	0.00526489	0.004218		0.052505	0.0393047	0.0981412
Medial mammillary nucleus	0.274248	0.317192	0.369065	0.453537	0.21132	0.276799	0.240233	0.344003		0.0771337	0.0572641	0.0385668	0.0286321		0.35351	0.268089	0.125657
Medial mammillary nucleus, median part	0.008929	0.00680305	0.0119053	0.0136917	0.00637786	0.0093542	0.0123305	0.0132638		0.00306511	0.00311881	0.00153256	0.0015594		0.0103323	0.0103316	0.999766
Supramammillary nucleus	0.148817	0.183682	0.193887	0.24046	0.132659	0.148392	0.14414	0.178847		0.0377959	0.0197122	0.0188979	0.00985612		0.191711	0.151009	0.104758
Supramammillary nucleus, lateral part	0.104597	0.130108	0.140313	0.175425	0.0990694	0.105447	0.0999198	0.124081		0.029345	0.0116493	0.0146725	0.00582464		0.137611	0.107129	0.101722
Supramammillary nucleus, medial part	0.0442198	0.053574	0.053574	0.0650354	0.03359	0.0429443	0.0442198	0.0547666		0.0085197	0.00866782	0.00425985	0.00433391		0.0541008	0.0438802	0.143587
Tuberomammillary nucleus	0.035716	0.0403931	0.0369916	0.0487766	0.0297633	0.0340153	0.0212595	0.0436422		0.00587949	0.00930674	0.00293975	0.00465337		0.0404693	0.0321701	0.18233
Tuberomammillary nucleus, dorsal part	0.0110549	0.0114801	0.0114801	0.00984089	0.00807862	0.0123305	0.00977938	0.0124081		0.000775124	0.00210436	0.000387562	0.00105218		0.010964	0.0106492	0.788281
Tuberomammillary nucleus, ventral part	0.024661	0.0289129	0.0255114	0.0389357	0.0216847	0.0216847	0.0114801	0.0312341		0.00654984	0.00806674	0.00327492	0.00403337		0.0295053	0.0215209	0.175257
Medial preoptic nucleus	0.163698	0.174753	0.174328	0.189972	0.137762	0.130959	0.12288	0.149753		0.0108091	0.0113729	0.00540454	0.00568646		0.175688	0.135338	0.0021291
Medial preoptic nucleus, central part	0.0042519	0.00340152	0.0042519	0.00256719	0.00340152	0.00382672	0.00255114	0.00385078		0.000807204	0.000607076	0.000403602	0.000303538		0.00361813	0.00340754	0.691184
Medial preoptic nucleus, lateral part	0.0710068	0.0739831	0.0637786	0.0718813	0.0608022	0.0612275	0.0471962	0.0671747		0.00443542	0.00845234	0.00221771	0.00422617		0.0701624	0.0591001	0.0596264
Medial preoptic nucleus, medial part	0.0769595	0.0884396	0.0960931	0.104399	0.0646289	0.0565504	0.0650542	0.0714533		0.0116658	0.00610586	0.00583289	0.00305293		0.0914728	0.0644217	0.00629416
Dorsal premammillary nucleus	0.062503	0.0684557	0.0773847	0.088568	0.0505977	0.0582512	0.0518732	0.0658911		0.011349	0.00700976	0.00567448	0.00350488		0.0742278	0.0566533	0.0387985
Ventral premammillary nucleus	0.0663297	0.062503	0.0727076	0.0945581	0.0484717	0.0574008	0.0182832	0.0641797		0.0143215	0.0202494	0.00716077	0.0101247		0.0740246	0.0470838	0.0728144
Paraventricular hypothalamic nucleus, descending division	0.03359	0.0318893	0.0344404	0.0282391	0.0293381	0.0276374	0.0233855	0.0329456		0.00274678	0.00396853	0.00137339	0.00198426		0.0320397	0.0283266	0.174811
Paraventricular hypothalamic nucleus, descending division, dorsal parvicellular part	0.0102046	0.00722824	0.008929	0.00641797	0.0102046	0.00637786	0.00552748	0.0059901		0.00169996	0.00214803	0.000849979	0.00107401		0.00819494	0.007025	0.425787
Paraventricular hypothalamic nucleus, descending division, forniceal part	0.00382671	0.00382671	0.00297633	0.00256719	0.00297633	0.00297634	0.00255114	0.00299505		0.000631565	0.000215895	0.000315783	0.000107948		0.00329924	0.00287472	0.250422
Paraventricular hypothalamic nucleus, descending division, lateral parvicellular part	0.0161572	0.015732	0.0191336	0.0132638	0.0131809	0.0153069	0.0127557	0.0183982		0.00240707	0.00257912	0.00120354	0.00128956		0.0160717	0.0149104	0.534756
Paraventricular hypothalamic nucleus, descending division, medial parvicellular part, ventral zone	0.00340152	0.00510228	0.00340152	0.00599011	0.00297633	0.00297634	0.00255114	0.00556224		0.00129019	0.00137847	0.000645093	0.000689233		0.00447386	0.00351651	0.349665
Ventromedial hypothalamic nucleus	0.324845	0.355034	0.366514	0.415029	0.248311	0.268721	0.204942	0.336729		0.0374895	0.054906	0.0187447	0.027453		0.365356	0.264676	0.0231368
Ventromedial hypothalamic nucleus, anterior part	0.0127557	0.015732	0.0136061	0.0136917	0.00807862	0.0119053	0.0106298	0.0119802		0.00126319	0.00182188	0.000631596	0.00091094		0.0139464	0.0106485	0.0247914
Ventromedial hypothalamic nucleus, central part	0.0922663	0.0926915	0.104597	0.122369	0.0663297	0.0761092	0.0527236	0.0958416		0.0141327	0.0181364	0.00706633	0.00906818		0.102981	0.072751	0.0390837
Ventromedial hypothalamic nucleus, dorsomedial part	0.0867388	0.0926915	0.0888648	0.115096	0.069306	0.0710069	0.0522984	0.0838614		0.0130662	0.0129598	0.0065331	0.0064799		0.0958477	0.0691182	0.0271619
Ventromedial hypothalamic nucleus, ventrolateral part	0.133085	0.153919	0.159446	0.163872	0.104597	0.109699	0.08929	0.145046		0.0136202	0.0235781	0.00681008	0.0117891		0.152581	0.112158	0.0249885
Posterior hypothalamic nucleus	0.520433	0.637786	0.628857	0.750903	0.467284	0.495773	0.464733	0.578045		0.0941692	0.0529604	0.0470846	0.0264802		0.634495	0.501459	0.048939
Hypothalamic lateral zone	4.37606	4.76256	4.6367	5.08517	3.43469	3.57883	3.09028	4.26196		0.294563	0.491759	0.147281	0.245879		4.71512	3.59144	0.00779729
Lateral hypothalamic area	2.79605	3.01035	2.92701	3.21498	2.16932	2.27775	2.02603	2.73106		0.175668	0.304651	0.0878342	0.152326		2.9871	2.30104	0.00796824
Lateral preoptic area	0.846554	0.909057	0.866538	0.925044	0.663297	0.6684	0.605046	0.76331		0.0364611	0.065505	0.0182306	0.0327525		0.886798	0.675013	0.00131903
Preparasubthalamic nucleus	0.008929	0.00935419	0.0119053	0.00599011	0.00935419	0.00850382	0.008929	0.0111245		0.0024237	0.00115132	0.00121185	0.000575662		0.00904466	0.00947787	0.757726
Parasubthalamic nucleus	0.0433694	0.053574	0.0527236	0.0710256	0.0331649	0.0425191	0.0391175	0.0496323		0.0115352	0.00687289	0.00576761	0.00343645		0.0551731	0.0411084	0.0810462
Retrochiasmatic area	0.15732	0.198564	0.187934	0.216927	0.133935	0.136911	0.0863137	0.187832		0.0249701	0.0414736	0.012485	0.0207368		0.190186	0.136248	0.067416
Subthalamic nucleus	0.14414	0.161998	0.170076	0.179275	0.125006	0.127132	0.12373	0.1382		0.0149292	0.00660607	0.00746458	0.00330304		0.163872	0.128517	0.00492184
Tuberal nucleus	0.322294	0.346955	0.359286	0.399198	0.256815	0.269996	0.152643	0.3286		0.0321001	0.0732264	0.01605	0.0366132		0.356933	0.252014	0.0393469
Zona incerta	1.45032	1.58086	1.58086	1.67423	1.15907	1.20329	1.21519	1.35419		0.0920383	0.0843656	0.0460192	0.0421828		1.57157	1.23294	0.00162598
Dopaminergic A13 group	0.0204091	0.0233855	0.0225351	0.025244	0.0153069	0.0127557	0.0174328	0.0141195		0.00200562	0.00198223	0.00100281	0.000991113		0.0228934	0.0149037	0.00129901
Fields of Forel	0.0369916	0.0493221	0.0386923	0.047493	0.0284878	0.0348657	0.0310389	0.0380799		0.00618468	0.00422046	0.00309234	0.00211023		0.0431247	0.0331181	0.0368834
Median eminence	0.0433694	0.0433694	0.0395427	0.0573339	0.0301885	0.0335901	0.0046771	0.0397914		0.00783063	0.0154436	0.00391532	0.00772179		0.0459039	0.0270618	0.0724259
Midbrain	18.6038	20.9394	20.1221	22.2348	15.2354	15.968	15.0292	17.5262		1.52082	1.13177	0.76041	0.565886		20.475	15.9397	0.00304791
Midbrain, sensory related	6.45311	7.32603	6.92125	7.2767	5.07805	5.54576	5.45817	5.88613		0.403324	0.332029	0.201662	0.166014		6.99427	5.49203	0.00120313
Superior colliculus, sensory related	1.7773	1.97756	1.83512	1.85651	1.40398	1.59702	1.47626	1.58695		0.0842241	0.092602	0.0421121	0.046301		1.86162	1.51605	0.00148503
Superior colliculus, optic layer	0.363963	0.395427	0.371191	0.359834	0.269996	0.307838	0.299759	0.332023		0.015923	0.025587	0.00796148	0.0127935		0.372604	0.302404	0.00347195
Superior colliculus, superficial gray layer	0.886947	0.975812	0.89205	0.926755	0.701989	0.80106	0.722399	0.768444		0.0409622	0.0447393	0.0204811	0.0223696		0.920391	0.748473	0.00129705
Superior colliculus, zonal layer	0.526386	0.606321	0.571881	0.569916	0.431993	0.488119	0.454104	0.486482		0.0327488	0.0271048	0.0163744	0.0135524		0.568626	0.465174	0.00280262
Inferior colliculus	4.38244	5.0283	4.76171	5.03939	3.43256	3.70766	3.75741	3.99326		0.30834	0.230081	0.15417	0.115041		4.80296	3.72272	0.00136111
Inferior colliculus, central nucleus	1.276	1.41376	1.35381	1.39099	0.957529	1.04725	1.09529	1.09619		0.0603815	0.0651655	0.0301908	0.0325828		1.35864	1.04906	0.000433706
Inferior colliculus, dorsal nucleus	0.738556	0.955828	0.918837	0.942586	0.577834	0.693912	0.762792	0.761599		0.101425	0.0869773	0.0507126	0.0434886		0.888952	0.699034	0.0294574
Inferior colliculus, external nucleus	2.36788	2.65872	2.48907	2.70582	1.8972	1.96651	1.89933	2.13547		0.155843	0.111955	0.0779217	0.0559776		2.55537	1.97463	0.00092104
Nucleus of the brachium of the inferior colliculus	0.0986442	0.0986442	0.0948175	0.134777	0.0790854	0.0752588	0.073558	0.103543		0.0187912	0.0139803	0.0093956	0.00699016		0.106721	0.0828613	0.087758
Nucleus sagulum	0.069306	0.0739831	0.0837625	0.0894237	0.0561251	0.0561252	0.0552748	0.0667468		0.00913641	0.00546729	0.0045682	0.00273364		0.0791189	0.058568	0.00835944
Parabigeminal nucleus	0.0471961	0.0599518	0.0676053	0.0787271	0.0539992	0.0476214	0.037842	0.0616125		0.0132546	0.0100669	0.00662732	0.00503347		0.0633701	0.0502687	0.166487
Midbrain trigeminal nucleus	0.078235	0.0875892	0.0782351	0.0778714	0.0522984	0.0620779	0.0578259	0.0740205		0.0047408	0.00922412	0.0023704	0.00461206		0.0804827	0.0615557	0.010707
Midbrain, motor related	7.84731	8.68834	8.42557	9.43185	6.44716	6.70356	6.09893	7.26471		0.657452	0.491162	0.328726	0.245581		8.59827	6.62859	0.00300005
Substantia nigra, reticular part	0.951576	1.04172	1.04639	1.38671	0.892049	0.812115	0.729627	1.08891		0.191771	0.15385	0.0958856	0.0769249		1.1066	0.880676	0.115725
Ventral tegmental area	0.595266	0.75939	0.723249	0.895093	0.545094	0.608448	0.505126	0.699558		0.12331	0.0847794	0.061655	0.0423897		0.74325	0.589557	0.0857498
Midbrain reticular nucleus, retrorubral area	0.297208	0.309113	0.32272	0.359406	0.265319	0.223225	0.238107	0.292231		0.0269593	0.0304815	0.0134797	0.0152407		0.322112	0.254721	0.0161608
Midbrain reticular nucleus	3.7893	4.18515	4.10606	4.60126	3.09071	3.1681	3.00482	3.60946		0.334283	0.269185	0.167141	0.134593		4.17044	3.21827	0.00438981
Midbrain reticular nucleus, magnocellular part	0	0	0	0	0	0	0	0		0	0	0	0		0	0	#DIV/0!
Midbrain reticular nucleus, magnocellular part, general	0	0	0	0	0	0	0	0		0	0	0	0		0	0	#DIV/0!
Midbrain reticular nucleus, parvicellular part	0	0	0	0	0	0	0	0		0	0	0	0		0	0	#DIV/0!
Superior colliculus, motor related	4.02868	4.43431	4.21534	4.56318	3.12898	3.3318	3.10219	3.4918		0.2364	0.183397	0.1182	0.0916984		4.31038	3.26369	0.000424594
Superior colliculus, motor related, deep gray layer	1.75986	1.9444	1.85085	1.97887	1.34828	1.44948	1.39122	1.54031		0.0985842	0.0830831	0.0492921	0.0415415		1.8835	1.43232	0.000423803
Superior colliculus, motor related, deep white layer	0.0816365	0.0931167	0.0867389	0.0872844	0.0671801	0.0629283	0.0603771	0.0718812		0.00469677	0.00504537	0.00234839	0.00252269		0.0871941	0.0655917	0.000766095
Superior colliculus, motor related, intermediate white layer	0.652667	0.762792	0.732603	0.782137	0.537441	0.55785	0.524685	0.622971		0.0570224	0.0436799	0.0285112	0.0218399		0.73255	0.560737	0.0030506
Superior colliculus, motor related, intermediate gray layer	2.61705	2.83559	2.68338	2.86284	1.99882	2.16847	1.99159	2.22233		0.118568	0.117692	0.0592839	0.0588458		2.74972	2.0953	0.000228469
Superior colliculus, motor related, intermediate gray layer, sublayer a	0.422214	0.446025	0.402655	0.450969	0.318468	0.329098	0.307413	0.334162		0.0223904	0.0118776	0.0111952	0.00593881		0.430466	0.322285	0.000141698
Superior colliculus, motor related, intermediate gray layer, sublayer b	0.884821	0.937545	0.919687	1.02816	0.677754	0.738131	0.647565	0.743628		0.0611264	0.0468658	0.0305632	0.0234329		0.942553	0.70177	0.000776364
Superior colliculus, motor related, intermediate gray layer, sublayer c	0.227477	0.250437	0.2228	0.235754	0.179856	0.194312	0.170927	0.178847		0.012127	0.0097405	0.00606352	0.00487025		0.234117	0.180985	0.000483133
Periaqueductal gray	3.88156	4.40837	4.15071	4.3009	3.08731	3.27312	3.13961	3.42976		0.228457	0.153049	0.114228	0.0765243		4.18539	3.23245	0.000446898
Precommissural nucleus	0.0531488	0.0701564	0.0599519	0.0607568	0.053574	0.0505977	0.044645	0.0436422		0.0069914	0.00476136	0.0034957	0.00238068		0.0610035	0.0481147	0.022586
Interstitial nucleus of Cajal	0.0344404	0.0318893	0.0391175	0.0376521	0.0276374	0.0259366	0.0272122	0.0312341		0.00324427	0.00227075	0.00162214	0.00113537		0.0357748	0.0280051	0.0077651
Nucleus of Darkschewitsch	0.0582511	0.0748335	0.0629282	0.0620404	0.0467709	0.0505977	0.0505977	0.0564781		0.00717286	0.00400703	0.00358643	0.00200351		0.0645133	0.0511111	0.0171976
Pretectal region	1.20414	1.26749	1.27727	1.33194	0.981339	1.04427	0.91586	0.985372		0.0523883	0.0524827	0.0261942	0.0262414		1.27021	0.98171	0.000237262
Anterior pretectal nucleus	0.698588	0.718997	0.731328	0.774007	0.562527	0.59059	0.503426	0.569487		0.0318543	0.0373454	0.0159271	0.0186727		0.73073	0.556508	0.000392448
Medial pretectal area	0.078235	0.0965182	0.082487	0.085573	0.0744083	0.075684	0.071432	0.0684583		0.00781237	0.00322776	0.00390619	0.00161388		0.0857033	0.0724957	0.0204545
Nucleus of the optic tract	0.126707	0.124581	0.134785	0.125364	0.0969434	0.105447	0.0875893	0.105682		0.00470008	0.00857575	0.00235004	0.00428787		0.127859	0.0989156	0.00103535
Nucleus of the posterior commissure	0.192186	0.209619	0.216422	0.228052	0.159872	0.176879	0.156045	0.155743		0.0149971	0.0100079	0.00749856	0.00500393		0.21157	0.162135	0.00153805
Olivary pretectal nucleus	0.0629282	0.0663297	0.0633534	0.0676026	0.0480465	0.0548496	0.053574	0.0492044		0.00227554	0.00330108	0.00113777	0.00165054		0.0650535	0.0514186	0.000494821
Posterior pretectal nucleus	0.0454954	0.051448	0.0488969	0.0513438	0.0395427	0.0408183	0.0437946	0.0367963		0.00279456	0.00290487	0.00139728	0.00145244		0.049296	0.040238	0.00412878
Cuneiform nucleus	0.260216	0.295933	0.278925	0.281107	0.216422	0.219824	0.193037	0.22848		0.0146511	0.0151452	0.00732557	0.0075726		0.279045	0.21444	0.000860347
Red nucleus	0.235981	0.263618	0.26872	0.308063	0.192186	0.227052	0.193462	0.23233		0.0296939	0.0214005	0.0148469	0.0107002		0.269095	0.211258	0.0195558
Oculomotor nucleus	0.0340152	0.0369916	0.0374168	0.0393636	0.0216847	0.0233855	0.0246611	0.0299505		0.00221041	0.00356814	0.0011052	0.00178407		0.0369468	0.0249204	0.00122587
Edinger-Westphal nucleus	0.0208343	0.0242359	0.0259366	0.0312341	0.017858	0.0216847	0.0187084	0.0183982		0.00433678	0.00171793	0.00216839	0.000858964		0.0255602	0.0191623	0.0335952
Trochlear nucleus	0.0119053	0.0106298	0.00977938	0.0128359	0.00850381	0.00850382	0.00722824	0.00898515		0.00135234	0.00075301	0.000676168	0.000376505		0.0112876	0.00830525	0.00842525
Ventral tegmental nucleus	0.035716	0.0403931	0.0323145	0.0308063	0.0276374	0.0323145	0.0297633	0.034657		0.00425242	0.00304979	0.00212621	0.00152489		0.0348075	0.0310931	0.205528
Anterior tegmental nucleus	0.0174328	0.0187084	0.015732	0.0243883	0.0161572	0.0182832	0.0123305	0.0166867		0.00375221	0.00252328	0.00187611	0.00126164		0.0190654	0.0158644	0.206584
Lateral terminal nucleus of the accessory optic tract	0.00850381	0.008929	0.00977938	0.0072737	0.00595267	0.00552748	0.00637786	0.0059901		0.00104334	0.000347669	0.000521669	0.000173834		0.00862147	0.00596203	0.00289106
Dorsal terminal nucleus of the accessory optic tract	0	0	0	0	0	0	0	0		0	0	0	0		0	0	#DIV/0!
Medial terminal nucleus of the accessory optic tract	0	0	0	0	0	0	0	0		0	0	0	0		0	0	#DIV/0!
Substantia nigra, lateral part	0	0	0	0	0	0	0	0		0	0	0	0		0	0	#DIV/0!
Midbrain, behavioral state related	1.10167	1.28407	1.26834	1.42778	0.998772	1.00813	0.910333	1.19545		0.133456	0.11991	0.0667281	0.0599549		1.27047	1.02817	0.035529
Substantia nigra, compact part	0.296358	0.323995	0.335475	0.405616	0.2802	0.263193	0.239382	0.331595		0.046498	0.0391	0.023249	0.01955		0.340361	0.278593	0.0882427
Pedunculopontine nucleus	0.325271	0.386498	0.362687	0.387646	0.286578	0.271272	0.259791	0.338441		0.0291985	0.034726	0.0145992	0.017363		0.365525	0.289021	0.0149964
Midbrain raphe nuclei	0.48004	0.573582	0.57018	0.634523	0.431993	0.473663	0.411159	0.525417		0.0636436	0.0504468	0.0318218	0.0252234		0.564581	0.460558	0.0428066
Interfascicular nucleus raphe	0.03359	0.0284878	0.0352908	0.0427865	0.024661	0.028913	0.0225351	0.0312341		0.00591904	0.00395328	0.00295952	0.00197664		0.0350388	0.0268358	0.0606909
Interpeduncular nucleus	0.217272	0.262342	0.275949	0.327317	0.196438	0.213446	0.191336	0.259286		0.045304	0.03092	0.022652	0.01546		0.27072	0.215126	0.0890175
Rostral linear nucleus raphe	0.026787	0.0323145	0.0323145	0.0415029	0.0276374	0.028913	0.0208343	0.0312341		0.00609998	0.00446889	0.00304999	0.00223445		0.0332297	0.0271547	0.15923
Central linear nucleus raphe	0.0735579	0.0948175	0.0875892	0.0937024	0.0701564	0.084613	0.0654793	0.0761599		0.0097703	0.008259	0.00488515	0.0041295		0.0874168	0.0741022	0.0825648
Dorsal nucleus raphe	0.128833	0.15562	0.139037	0.129215	0.113101	0.117778	0.110975	0.127504		0.0125515	0.00734799	0.00627573	0.00367399		0.138176	0.117339	0.0286009
Hindbrain	26.4902	30.2	16.5463	32.2867	23.2443	17.9873	19.3474	25.7266		6.98081	3.55229	3.49041	1.77615		26.3808	21.5764	0.265866
Pons	13.4815	15.1338	14.1355	16.7719	11.097	12.2302	10.8989	13.5958		1.43221	1.24089	0.716107	0.620445		14.8807	11.9555	0.0214634
Pons, sensory related	2.76671	3.08901	2.61492	3.52047	2.31474	2.35003	2.09406	2.78454		0.400625	0.288926	0.200313	0.144463		2.99778	2.38584	0.0479504
Nucleus of the lateral lemniscus	0.665848	0.754288	0.744509	0.964407	0.585912	0.601645	0.535315	0.750046		0.12772	0.0923218	0.0638599	0.0461609		0.782263	0.61823	0.0825371
Nucleus of the lateral lemniscus, dorsal part	0.166249	0.198564	0.197714	0.236181	0.149242	0.150943	0.140313	0.173285		0.0286069	0.0140239	0.0143035	0.00701195		0.199677	0.153446	0.0272558
Nucleus of the lateral lemniscus, horizontal part	0.0433694	0.0586763	0.046771	0.0603289	0.0391175	0.0391176	0.0369916	0.0449258		0.00847439	0.00340907	0.00423719	0.00170454		0.0522864	0.0400381	0.0364487
Nucleus of the lateral lemniscus, ventral part	0.456229	0.497048	0.500024	0.667897	0.397553	0.411585	0.35801	0.531835		0.0938825	0.0749098	0.0469412	0.0374549		0.530299	0.424746	0.12931
Principal sensory nucleus of the trigeminal	0.801059	0.857609	0.650116	0.981522	0.671801	0.687534	0.589314	0.785987		0.137473	0.0806796	0.0687365	0.0403398		0.822576	0.683659	0.131959
Parabrachial nucleus	0.692635	0.769169	0.743233	0.799251	0.575283	0.566779	0.526811	0.656344		0.0451852	0.0543068	0.0225926	0.0271534		0.751072	0.581304	0.00298202
Koelliker-Fuse subnucleus	0.109274	0.125431	0.119904	0.14419	0.0939671	0.0952428	0.0858885	0.109105		0.0146217	0.0096383	0.00731084	0.00481915		0.1247	0.0960509	0.0169958
Parabrachial nucleus, lateral division	0.387348	0.433269	0.419663	0.440701	0.321869	0.315066	0.29083	0.358978		0.0235979	0.0282054	0.011799	0.0141027		0.420245	0.321686	0.00172793
Parabrachial nucleus, lateral division, central lateral part	0.12373	0.138187	0.136486	0.133922	0.102046	0.0990695	0.0918412	0.105682		0.00647574	0.00587211	0.00323787	0.00293606		0.133081	0.0996597	0.000261233
Parabrachial nucleus, lateral division, dorsal lateral part	0.053574	0.0608022	0.0561251	0.063324	0.0429442	0.0442199	0.0386923	0.0474929		0.00441471	0.00364136	0.00220736	0.00182068		0.0584563	0.0433373	0.0018583
Parabrachial nucleus, lateral division, external lateral part	0.0608022	0.0569755	0.0637786	0.069742	0.044645	0.0480466	0.0450702	0.066319		0.00538708	0.0103108	0.00269354	0.00515542		0.0628246	0.0510202	0.0887365
Parabrachial nucleus, lateral division, superior lateral part	0.0795106	0.0939671	0.0863137	0.0932745	0.0654793	0.0637786	0.0620778	0.075732		0.00678371	0.0061359	0.00339186	0.00306795		0.0882665	0.0667669	0.00332314
Parabrachial nucleus, lateral division, ventral lateral part	0.0697312	0.0833373	0.0769595	0.0804386	0.0667549	0.0599519	0.0531488	0.0637518		0.00586803	0.00587061	0.00293401	0.0029353		0.0776166	0.0609019	0.00690036
Parabrachial nucleus, medial division	0.196013	0.210469	0.203666	0.21436	0.159446	0.15647	0.150092	0.18826		0.00806216	0.0169182	0.00403108	0.00845908		0.206127	0.163567	0.00392529
Parabrachial nucleus, medial division, external medial part	0.0187084	0.0191336	0.0229603	0.0269555	0.017858	0.0165824	0.0153069	0.0179703		0.00385208	0.0012515	0.00192604	0.000625752		0.0219394	0.0169294	0.0482011
Parabrachial nucleus, medial division, medial medial part	0.177304	0.191336	0.180706	0.187405	0.141588	0.139888	0.134785	0.17029		0.00634943	0.0160309	0.00317472	0.00801543		0.184188	0.146638	0.00479389
Parabrachial nucleus, medial division, ventral medial part	0	0	0	0	0	0	0	0		0	0	0	0		0	0	#DIV/0!
Superior olivary complex	0.607172	0.707942	0.477064	0.775291	0.481741	0.494072	0.442623	0.592164		0.129784	0.0635788	0.0648921	0.0317894		0.641867	0.50265	0.102324
Superior olivary complex, periolivary region	0.510228	0.595692	0.42519	0.658056	0.403931	0.421789	0.366514	0.496751		0.101479	0.0547497	0.0507393	0.0273749		0.547292	0.422246	0.0731694
Superior olivary complex, medial part	0.0365664	0.0433694	0.0369916	0.041075	0.0301885	0.0259366	0.0306137	0.0350849		0.00328387	0.00373932	0.00164194	0.00186966		0.0395006	0.0304559	0.0109013
Superior olivary complex, lateral part	0.060377	0.0688808	0.0148817	0.0761599	0.0476213	0.0463458	0.0454954	0.0603289		0.0275608	0.00697561	0.0137804	0.00348781		0.0550749	0.0499478	0.730698
Pons, motor related	4.30293	4.868	4.29953	5.11512	3.5193	3.66004	3.30373	4.23201		0.411139	0.396865	0.20557	0.198433		4.6464	3.67877	0.0147364
Barrington's nucleus	0.0293381	0.0293381	0.0259366	0.0231047	0.0229603	0.0250863	0.0187084	0.0239604		0.00301208	0.00278579	0.00150604	0.00139289		0.0269294	0.0226788	0.0836541
Dorsal tegmental nucleus	0.0829121	0.0926915	0.0880144	0.0744485	0.0667549	0.0671802	0.0680305	0.0842893		0.00781037	0.00850028	0.00390518	0.00425014		0.0845166	0.0715637	0.0659687
Lateral tegmental nucleus	0	0	0	0	0	0	0	0		0	0	0	0		0	0	#DIV/0!
Pontine central gray	0.55785	0.604196	0.578684	0.580613	0.415836	0.453253	0.403931	0.507447		0.0189536	0.046565	0.00947679	0.0232825		0.580336	0.445117	0.00169695
Pontine gray	0.556999	0.630557	0.6701	0.895093	0.415411	0.473663	0.464733	0.63709		0.145681	0.0963771	0.0728404	0.0481886		0.688188	0.497724	0.0719849
Pontine reticular nucleus, caudal part	2.14934	2.47971	1.92696	2.41701	1.81556	1.83853	1.64846	2.05717		0.254926	0.167779	0.127463	0.0838894		2.24325	1.83993	0.0383783
Pontine reticular nucleus, ventral part	0	0	0	0	0	0	0	0		0	0	0	0		0	0	#DIV/0!
Supragenual nucleus	0.0102046	0.0148817	0.0119053	0.0106966	0.0114801	0.00892901	0.008929	0.00984088		0.00209849	0.00120301	0.00104925	0.000601505		0.011922	0.00979476	0.129089
Superior salivatory nucleus	0	0	0	0	0	0	0	0		0	0	0	0		0	0	#DIV/0!
Supratrigeminal nucleus	0.113526	0.125856	0.125006	0.127076	0.101195	0.0965183	0.0888648	0.115523		0.00628447	0.0112163	0.00314223	0.00560813		0.122866	0.100525	0.0132185
Tegmental reticular nucleus	0.457505	0.515331	0.5013	0.609279	0.374168	0.409459	0.355034	0.465089		0.0638881	0.048345	0.031944	0.0241725		0.520854	0.400937	0.024211
Motor nucleus of trigeminal	0.345255	0.375443	0.371616	0.377805	0.295933	0.287429	0.247036	0.331595		0.0150674	0.0347221	0.0075337	0.0173611		0.36753	0.290498	0.00657343
Pons, behavioral state related	2.72249	3.08816	2.93126	3.17091	2.24415	2.30496	2.04006	2.68613		0.197328	0.269809	0.098664	0.134904		2.97821	2.31883	0.00757924
Superior central nucleus raphe	0.396277	0.450702	0.430718	0.457387	0.332074	0.351633	0.31209	0.382939		0.0274438	0.0301833	0.0137219	0.0150917		0.433771	0.344684	0.00473125
Superior central nucleus raphe, lateral part	0.203241	0.257665	0.230878	0.241316	0.170501	0.181557	0.168375	0.20837		0.022857	0.018378	0.0114285	0.00918902		0.233275	0.182201	0.013097
Superior central nucleus raphe, medial part	0.193036	0.193036	0.19984	0.216072	0.161572	0.170076	0.143714	0.174569		0.0108678	0.0136237	0.00543388	0.00681183		0.200496	0.162483	0.00475774
Locus ceruleus	0.0450702	0.0437946	0.044645	0.0444979	0.0382671	0.0340153	0.0323145	0.0449258		0.000530311	0.00561861	0.000265156	0.00280931		0.0445019	0.0373807	0.0450632
Laterodorsal tegmental nucleus	0.113101	0.119053	0.117778	0.116379	0.0909907	0.0875893	0.0897152	0.106538		0.00256243	0.00866754	0.00128122	0.00433377		0.116578	0.0937084	0.00230954
Nucleus incertus	0.0986442	0.114376	0.107148	0.103115	0.0701564	0.0871641	0.0752587	0.0988367		0.00667782	0.0128185	0.00333891	0.00640924		0.105821	0.082854	0.0191235
Pontine reticular nucleus	1.93887	2.21864	2.09449	2.31774	1.61317	1.62508	1.42524	1.92197		0.163584	0.205271	0.081792	0.102635		2.14244	1.64636	0.00918164
Nucleus raphe pontis	0.0442198	0.0420938	0.0408183	0.047493	0.0365664	0.0412435	0.0369916	0.0449258		0.00291738	0.00394255	0.00145869	0.00197128		0.0436562	0.0399318	0.179627
Subceruleus nucleus	0.0242358	0.0280626	0.0250862	0.0218211	0.0170076	0.0182832	0.0157321	0.0213932		0.00257671	0.00242757	0.00128836	0.00121378		0.0248014	0.018104	0.00914051
Sublaterodorsal nucleus	0.0620778	0.071432	0.0705816	0.0624683	0.0459206	0.0599519	0.0527236	0.0646075		0.0050569	0.00820321	0.00252845	0.00410161		0.0666399	0.0558009	0.0654826
Medulla	21.325	24.3507	8.22871	26.2273	19.296	12.6401	15.59	20.4772		8.12448	3.57581	4.06224	1.7879		20.0329	17.0008	0.519995
Medulla, sensory related	4.689	5.36165	1.72882	6.16339	4.19876	2.82879	3.45467	4.65046		1.93422	0.80491	0.967111	0.402455		4.48572	3.78317	0.527381
Area postrema	0.0289129	0.0323145	0	0.0397914	0.0238107	0.0216847	0.0140313	0.0312341		0.0174388	0.00707675	0.00871942	0.00353838		0.0252547	0.0226902	0.794351
Cochlear nuclei	1.18713	1.27982	1.14716	1.46501	1.02896	1.02471	0.914585	1.14668		0.141516	0.0947922	0.0707582	0.0473961		1.26978	1.02873	0.0299434
Granular lamina of the cochlear nuclei	0.0344404	0.0352908	0.0331649	0.0372242	0.0297633	0.0293382	0.0238107	0.0333734		0.00170382	0.00394684	0.000851912	0.00197342		0.0350301	0.0290714	0.0323289
Cochlear nucleus, subpedunclular granular region	0.035716	0.0323145	0.03359	0.0350849	0.0272122	0.0276374	0.0233855	0.0308062		0.00152821	0.00304042	0.000764107	0.00152021		0.0341764	0.0272603	0.00661445
Dorsal cochlear nucleus	0.428167	0.455804	0.46856	0.489477	0.361412	0.365239	0.312515	0.418451		0.0256394	0.0432945	0.0128197	0.0216472		0.460502	0.364404	0.00876379
Ventral cochlear nucleus	0.688808	0.756414	0.611849	0.903223	0.610573	0.602495	0.554874	0.664045		0.123766	0.044723	0.0618831	0.0223615		0.740073	0.607997	0.0915012
Dorsal column nuclei	0.198989	0.198139	0.0165824	0.293087	0.180706	0.0871641	0.125431	0.205803		0.115672	0.0535679	0.057836	0.026784		0.176699	0.149776	0.687441
Cuneate nucleus	0.153069	0.156045	0.0165824	0.22634	0.142014	0.0833374	0.107148	0.169862		0.0877476	0.0381014	0.0438738	0.0190507		0.138009	0.12559	0.803823
Gracile nucleus	0.0459206	0.0420938	0	0.0667469	0.0386923	0.00382672	0.0182832	0.0359406		0.027976	0.016309	0.013988	0.00815449		0.0386903	0.0241857	0.404851
External cuneate nucleus	0.207068	0.248736	0.0701564	0.318759	0.20069	0.105873	0.170501	0.243027		0.104703	0.0576934	0.0523516	0.0288467		0.21118	0.180023	0.620859
Nucleus of the trapezoid body	0.0935419	0.101195	0.12203	0.150181	0.0722824	0.0850382	0.0837625	0.0855729		0.025338	0.00630035	0.012669	0.00315018		0.116737	0.081664	0.0362166
Nucleus of the solitary tract	0.593566	0.632683	0.208769	0.744913	0.484292	0.427317	0.392026	0.560502		0.233141	0.0735615	0.11657	0.0367807		0.544983	0.466034	0.54226
Nucleus of the solitary tract, central part	0.0127557	0.0102046	0.00340152	0.0196818	0.00935419	0.0114802	0.00637786	0.0136917		0.00672759	0.00311726	0.00336379	0.00155863		0.0115109	0.010226	0.740731
Nucleus of the solitary tract, commissural part	0.051448	0.0480465	0	0.0616125	0.0437946	0.0301886	0.0229603	0.04407		0.0274627	0.0104476	0.0137313	0.00522381		0.0402768	0.0352534	0.744064
Nucleus of the solitary tract, gelatinous part	0.0195588	0.0161572	0.00382671	0.0218211	0.0148817	0.0127557	0.0123305	0.0162588		0.00802135	0.00184411	0.00401068	0.000922055		0.015341	0.0140567	0.765548
Nucleus of the solitary tract, lateral part	0.219398	0.261492	0.0680305	0.29865	0.188359	0.147116	0.15562	0.209226		0.101225	0.0288846	0.0506125	0.0144423		0.211893	0.17508	0.510481
Nucleus of the solitary tract, medial part	0.290405	0.296783	0.13351	0.343148	0.227902	0.225776	0.194737	0.277256		0.0913757	0.0341116	0.0456879	0.0170558		0.265961	0.231418	0.505317
Spinal nucleus of the trigeminal, caudal part	0.635234	0.755138	0	1.03244	0.608447	0.0250863	0.340152	0.671747		0.436723	0.294914	0.218362	0.147457		0.605703	0.411358	0.488597
Spinal nucleus of the trigeminal, interpolar part	1.30789	1.58809	0.0327397	1.65584	1.21689	0.650967	1.05957	1.29301		0.757392	0.286426	0.378696	0.143213		1.14614	1.05511	0.829575
Spinal nucleus of the trigeminal, oral part	0.43667	0.525535	0.131384	0.463378	0.382671	0.400955	0.354609	0.412889		0.17589	0.0253671	0.0879452	0.0126835		0.389242	0.387781	0.987417
Spinal nucleus of the trigeminal, oral part, caudal dorsomedial part	0.0284878	0.035716	0.0165824	0.0342292	0.0259366	0.0284878	0.0272122	0.0265276		0.00869224	0.00109632	0.00434612	0.000548161		0.0287538	0.027041	0.709305
Spinal nucleus of the trigeminal, oral part, middle dorsomedial part, dorsal zone	0.0301885	0.0378419	0.019984	0.034657	0.0318893	0.0318893	0.0284878	0.0308062		0.00778367	0.0016037	0.00389184	0.000801849		0.0306679	0.0307681	0.980684
Spinal nucleus of the trigeminal, oral part, middle dorsomedial part, ventral zone	0.0459206	0.0518732	0.0123305	0.0453537	0.0399679	0.0382672	0.0318893	0.0389357		0.0179367	0.00365145	0.00896835	0.00182573		0.0388695	0.037265	0.866603
Spinal nucleus of the trigeminal, oral part, rostral dorsomedial part	0.0667549	0.0807862	0.0599519	0.072737	0.0548496	0.0620779	0.0522984	0.0641797		0.00885655	0.0056791	0.00442828	0.00283955		0.0700575	0.0583514	0.0677031
Spinal nucleus of the trigeminal, oral part, ventrolateral part	0.265319	0.319318	0.0225351	0.276401	0.230028	0.240233	0.214721	0.25244		0.134273	0.0159773	0.0671367	0.00798866		0.220893	0.234356	0.848747
Nucleus z	0	0	0	0	0	0	0	0		0	0	0	0		0	0	#DIV/0!
Medulla, motor related	11.845	13.6061	4.92328	14.1123	10.8219	6.77457	8.31588	11.2062		4.24496	2.10512	2.12248	1.05256		11.1216	9.27965	0.466405
Abducens nucleus	0.0123305	0.0136061	0.0123305	0.0119802	0.0119053	0.0114802	0.00722824	0.00855729		0.000715488	0.00226667	0.000357744	0.00113334		0.0125618	0.00979275	0.0586422
Accessory abducens nucleus	0	0	0	0	0	0	0	0		0	0	0	0		0	0	#DIV/0!
Facial motor nucleus	0.522984	0.566354	0.00127557	0.554513	0.440922	0.459206	0.409884	0.418451		0.273949	0.0223042	0.136975	0.0111521		0.411282	0.432116	0.88447
Accessory facial motor nucleus	0.0127557	0.0119053	0.00595267	0.0145474	0.0106298	0.00722825	0.00850381	0.0128359		0.0037249	0.00246302	0.00186245	0.00123151		0.0112903	0.00979944	0.529154
Efferent vestibular nucleus	0	0	0	0	0	0	0	0		0	0	0	0		0	0	#DIV/0!
Nucleus ambiguus	0.102896	0.121604	0	0.125792	0.0952427	0.0293382	0.0591015	0.105255		0.0592246	0.034796	0.0296123	0.017398		0.0875732	0.0722342	0.670821
Nucleus ambiguus, dorsal division	0.0182832	0.0225351	0	0.0265276	0.0182832	0.00425191	0.0131809	0.0179703		0.0117183	0.00654388	0.00585913	0.00327194		0.0168365	0.0134216	0.629012
Nucleus ambiguus, ventral division	0.0582511	0.0659045	0	0.0547667	0.0416687	0.0250863	0.0374168	0.0526273		0.0301811	0.0113837	0.0150905	0.00569184		0.0447306	0.0391998	0.743349
Dorsal motor nucleus of the vagus nerve	0.107998	0.0948175	0.00722824	0.135205	0.0799358	0.0480466	0.0569755	0.0834336		0.0553397	0.0172924	0.0276698	0.0086462		0.0863123	0.0670979	0.532071
Efferent cochlear group	0	0	0	0	0	0	0	0		0	0	0	0		0	0	#DIV/0!
Gigantocellular reticular nucleus	2.09406	2.46143	0.821043	2.45766	1.94397	1.33212	1.57448	2.07771		0.777663	0.341155	0.388831	0.170578		1.95855	1.73207	0.612937
Infracerebellar nucleus	0.00637786	0.00595267	0.00850381	0.00941303	0.00595267	0.00680305	0.00425191	0.00684583		0.00166388	0.00121285	0.000831938	0.000606426		0.00756184	0.00596336	0.171491
Inferior olivary complex	0.299759	0.339302	0	0.344431	0.252563	0.00850382	0.312515	0.273405		0.165126	0.137755	0.0825631	0.0688777		0.245873	0.211747	0.761702
Intermediate reticular nucleus	2.01753	2.36789	0.647565	2.5197	1.91208	1.00515	1.3487	1.92111		0.853383	0.449505	0.426691	0.224753		1.88817	1.54676	0.505549
Inferior salivatory nucleus	0.0399679	0.0463458	0.037842	0.0355128	0.0323145	0.0369916	0.0301885	0.0350849		0.00465598	0.00299947	0.00232799	0.00149974		0.0399171	0.0336449	0.0641105
Linear nucleus of the medulla	0.0276374	0.0318893	0	0.0338013	0.026787	0.00680305	0.0233855	0.0231047		0.0157665	0.00896886	0.00788327	0.00448443		0.023332	0.0200201	0.727509
Lateral reticular nucleus	0.406907	0.476638	0	0.506164	0.391175	0.017858	0.195162	0.397486		0.235327	0.181272	0.117664	0.0906361		0.347427	0.25042	0.537876
Lateral reticular nucleus, magnocellular part	0.362262	0.429442	0	0.456104	0.349081	0.0123305	0.17943	0.363685		0.211683	0.165257	0.105841	0.0826284		0.311952	0.226132	0.546344
Lateral reticular nucleus, parvicellular part	0.0348656	0.0382671	0	0.0393636	0.0310389	0.00552748	0.0153069	0.0260997		0.0188469	0.0113947	0.00942346	0.00569734		0.0281241	0.0194932	0.46298
Magnocellular reticular nucleus	0.518307	0.608873	0.0131809	0.591309	0.44645	0.277224	0.383947	0.493755		0.282559	0.0935926	0.141279	0.0467963		0.432917	0.400344	0.83401
Medullary reticular nucleus	1.18501	1.37804	0	1.78933	1.29981	0.00382672	0.539142	1.19246		0.767929	0.60525	0.383964	0.302625		1.08809	0.758808	0.525683
Medullary reticular nucleus, dorsal part	0.398403	0.443899	0	0.595588	0.374168	0.00382672	0.176879	0.382511		0.254044	0.180688	0.127022	0.090344		0.359472	0.234346	0.452739
Medullary reticular nucleus, ventral part	0.786602	0.934143	0	1.19374	0.92564	0	0.362262	0.809947		0.514078	0.42576	0.257039	0.21288		0.728622	0.524462	0.563168
Parvicellular reticular nucleus	1.14971	1.35721	0.630132	1.28745	1.02131	0.858035	0.900128	1.06838		0.328831	0.0991132	0.164415	0.0495566		1.10612	0.961962	0.43335
Parasolitary nucleus	0.026787	0.0229603	0	0.0367964	0.0212595	0.017858	0.0136061	0.0196818		0.0155589	0.00330344	0.00777946	0.00165172		0.0216359	0.0181013	0.672307
Paragigantocellular reticular nucleus	0.711343	0.779799	0.196863	0.807809	0.620778	0.443474	0.483442	0.634523		0.287596	0.0963541	0.143798	0.0481771		0.623954	0.545554	0.623677
Paragigantocellular reticular nucleus, dorsal part	0.176454	0.194312	0.196863	0.2165	0.159021	0.163698	0.14499	0.171574		0.0163897	0.0111618	0.00819487	0.0055809		0.196032	0.159821	0.0106773
Paragigantocellular reticular nucleus, lateral part	0.534889	0.585487	0	0.591309	0.461757	0.279776	0.338452	0.462949		0.286404	0.0916596	0.143202	0.0458298		0.427921	0.385733	0.788451
Perihypoglossal nuclei	0.317192	0.360561	0.341428	0.372242	0.269146	0.281476	0.227902	0.302072		0.0240674	0.0312688	0.0120337	0.0156344		0.347856	0.270149	0.00763639
Nucleus intercalatus	0	0	0	0	0	0	0	0		0	0	0	0		0	0	#DIV/0!
Nucleus of Roller	0.0289129	0.0250862	0.0259366	0.0338013	0.0221099	0.0182832	0.0174328	0.0239604		0.00393624	0.0031025	0.00196812	0.00155125		0.0284343	0.0204466	0.0188966
Nucleus prepositus	0.288279	0.335475	0.315491	0.338441	0.247036	0.263193	0.210469	0.278112		0.0231284	0.0290714	0.0115642	0.0145357		0.319422	0.249702	0.0094711
Paramedian reticular nucleus	0	0	0	0	0	0	0	0		0	0	0	0		0	0	#DIV/0!
Parapyramidal nucleus	0.0386923	0.0386923	0	0.0363685	0.0323145	0.0348657	0.0416687	0.0376521		0.0189905	0.00400705	0.00949524	0.00200353		0.0284383	0.0366252	0.431215
Parapyramidal nucleus, deep part	0	0	0	0	0	0	0	0		0	0	0	0		0	0	#DIV/0!
Parapyramidal nucleus, superficial part	0	0	0	0	0	0	0	0		0	0	0	0		0	0	#DIV/0!
Vestibular nuclei	1.94652	2.23905	2.08981	2.08541	1.65824	1.73733	1.5141	1.85522		0.119476	0.143155	0.0597381	0.0715774		2.0902	1.69122	0.00520879
Lateral vestibular nucleus	0.329097	0.376719	0.355459	0.343575	0.293381	0.297208	0.248311	0.313197		0.0201329	0.0278318	0.0100665	0.0139159		0.351213	0.288024	0.0103423
Medial vestibular nucleus	0.972835	1.12335	1.05787	1.04399	0.799358	0.869515	0.749186	0.926754		0.0617311	0.0779718	0.0308656	0.0389859		1.04951	0.836203	0.00515007
Spinal vestibular nucleus	0.372042	0.450277	0.383522	0.422303	0.331649	0.363113	0.309114	0.388073		0.0359646	0.0347072	0.0179823	0.0173536		0.407036	0.347987	0.0560638
Superior vestibular nucleus	0.272547	0.288704	0.292956	0.275545	0.233855	0.207493	0.207493	0.227196		0.00992045	0.0135727	0.00496022	0.00678636		0.282438	0.219009	0.000281006
Nucleus x	0.0365664	0.0420938	0.0276374	0.0436422	0.0344404	0.035716	0.0284878	0.0342291		0.00723354	0.00322139	0.00361677	0.00161069		0.037485	0.0332183	0.322602
Hypoglossal nucleus	0.320168	0.302736	0.0629282	0.385934	0.278075	0.134786	0.188359	0.271694		0.141293	0.0690289	0.0706464	0.0345145		0.267942	0.218228	0.550529
Nucleus y	0.0182832	0.0191336	0.0195588	0.0188261	0.0153069	0.0153069	0.0153069	0.0132638		0.000536748	0.00102153	0.000268374	0.000510767		0.0189504	0.0147961	0.000363299
Interstitial nucleus of the vestibular nerve	0	0	0	0	0	0	0	0		0	0	0	0		0	0	#DIV/0!
Medulla, behavioral state related	0.164123	0.187084	0.0484717	0.204519	0.145415	0.0688809	0.139037	0.167295		0.0703577	0.0426054	0.0351789	0.0213027		0.15105	0.130157	0.629576
Nucleus raphe magnus	0.0858884	0.0965182	0.0459206	0.097981	0.0748335	0.0603771	0.0756839	0.0825778		0.0243742	0.00932908	0.0121871	0.00466454		0.0815771	0.0733681	0.552481
Nucleus raphe pallidus	0.0369916	0.0467709	0.00255114	0.0513438	0.0348656	0.00680305	0.0306137	0.0432143		0.0220696	0.0156173	0.0110348	0.00780863		0.0344144	0.0288742	0.69616
Nucleus raphe obscurus	0.0412435	0.0437946	0	0.0551946	0.035716	0.00170076	0.0327397	0.0415028		0.0241463	0.0178508	0.0120732	0.00892538		0.0350582	0.0279148	0.651062
Cerebellum	40.5691	45.9061	39.6524	48.8489	35.895	28.8709	29.9117	37.8912		4.38009	4.42762	2.19005	2.21381		43.7441	33.1422	0.0144149
Cerebellar cortex	33.9132	39.0401	32.9765	41.4755	29.9866	24.5501	25.3384	32.4176		4.07516	3.76058	2.03758	1.88029		36.8513	28.0732	0.0194154
Vermal regions	14.7941	15.9221	12.1532	16.7346	12.3594	11.2437	11.3862	12.9835		1.99722	0.825644	0.998609	0.412822		14.901	11.9932	0.0360066
Lingula (I)	0.0909907	0.106723	0.101621	0.111673	0.0739831	0.0892901	0.0663297	0.0744484		0.00884974	0.00960235	0.00442487	0.00480117		0.102752	0.0760128	0.00639135
Lingula (I), molecular layer	0.0552747	0.062503	0.0591015	0.0637519	0.0433694	0.0497473	0.0386923	0.0474929		0.00380251	0.00486743	0.00190125	0.00243371		0.0601578	0.0448255	0.00254055
Lingula (I), Purkinje layer	0	0	0	0	0	0	0	0		0	0	0	0		0	0	#DIV/0!
Lingula (I), granular layer	0.035716	0.0442198	0.042519	0.0479209	0.0306137	0.0395428	0.0276374	0.0269555		0.00510984	0.00579232	0.00255492	0.00289616		0.0425939	0.0311873	0.0254964
Central lobule	3.37899	3.41428	3.42066	3.4764	2.82369	2.46228	2.41636	2.56419		0.0402892	0.182168	0.0201446	0.0910842		3.42258	2.56663	9.43929e-05
Lobule II	1.14461	1.18713	1.13356	1.17107	0.977938	0.832524	0.863137	0.887391		0.0244353	0.0626227	0.0122176	0.0313113		1.15909	0.890247	0.000203632
Lobule II, molecular layer	0.608873	0.638211	0.610574	0.626822	0.521709	0.458781	0.473662	0.478352		0.0139742	0.027041	0.00698709	0.0135205		0.62112	0.483126	0.000100953
Lobule II, Purkinje layer	0	0	0	0	0	0	0	0		0	0	0	0		0	0	#DIV/0!
Lobule II, granular layer	0.53574	0.548921	0.522984	0.544244	0.456229	0.373743	0.389475	0.409038		0.0113846	0.0357808	0.0056923	0.0178904		0.537972	0.407121	0.000433552
Lobule III	2.23438	2.22715	2.2871	2.30534	1.84575	1.62976	1.55322	1.6768		0.0386304	0.123867	0.0193152	0.0619333		2.26349	1.67638	0.000102048
Lobule III, molecular layer	1.15312	1.18756	1.20754	1.21342	0.951576	0.869515	0.825295	0.895948		0.0272159	0.0527742	0.0136079	0.0263871		1.19041	0.885584	4.98242e-05
Lobule III, Purkinje layer	0	0	0	0	0	0	0	0		0	0	0	0		0	0	#DIV/0!
Lobule III, granular layer	1.08126	1.03959	1.07956	1.09191	0.894175	0.760241	0.727926	0.780852		0.0229857	0.0722781	0.0114928	0.0361391		1.07308	0.790799	0.000302852
Culmen	5.38078	5.96755	5.97393	6.14628	4.4628	4.6163	4.47385	4.90589		0.334637	0.206323	0.167318	0.103161		5.86713	4.61471	0.000702124
Lobule IV	0	0	0	0	0	0	0	0		0	0	0	0		0	0	#DIV/0!
Lobule IV, molecular layer	0	0	0	0	0	0	0	0		0	0	0	0		0	0	#DIV/0!
Lobule IV, Purkinje layer	0	0	0	0	0	0	0	0		0	0	0	0		0	0	#DIV/0!
Lobule IV, granular layer	0	0	0	0	0	0	0	0		0	0	0	0		0	0	#DIV/0!
Lobule V	0	0	0	0	0	0	0	0		0	0	0	0		0	0	#DIV/0!
Lobule V, molecular layer	0	0	0	0	0	0	0	0		0	0	0	0		0	0	#DIV/0!
Lobule V, Purkinje layer	0	0	0	0	0	0	0	0		0	0	0	0		0	0	#DIV/0!
Lobule V, granular layer	0	0	0	0	0	0	0	0		0	0	0	0		0	0	#DIV/0!
Lobules IV-V	5.38078	5.96755	5.97393	6.14628	4.4628	4.6163	4.47385	4.90589		0.334637	0.206323	0.167318	0.103161		5.86713	4.61471	0.000702124
Lobules IV-V, molecular layer	2.93807	3.25356	3.19148	3.36772	2.41338	2.52861	2.42444	2.68528		0.18173	0.126083	0.0908651	0.0630413		3.18771	2.51293	0.000883097
Lobules IV-V, Purkinje layer	0	0	0	0	0	0	0	0		0	0	0	0		0	0	#DIV/0!
Lobules IV-V, granular layer	2.44272	2.71399	2.78245	2.77855	2.04942	2.08769	2.04942	2.22062		0.160898	0.0812489	0.0804491	0.0406245		2.67943	2.10178	0.000680332
Declive (VI)	1.93419	2.17315	0.794256	2.27111	1.67057	1.85638	1.77942	1.85736		0.680814	0.0881574	0.340407	0.0440787		1.79318	1.79093	0.995003
Declive (VI), molecular layer	0.955403	1.08806	0.432844	1.13812	0.855058	0.964333	0.924364	0.919481		0.323172	0.0452104	0.161586	0.0226052		0.903607	0.915809	0.942818
Declive (VI), Purkinje layer	0	0	0	0	0	0	0	0		0	0	0	0		0	0	#DIV/0!
Declive (VI), granular layer	0.978788	1.08509	0.361412	1.13299	0.815515	0.89205	0.855058	0.937879		0.357952	0.0522191	0.178976	0.0261096		0.889568	0.875126	0.938954
Folium-tuber vermis (VII)	0.353758	0.366939	0.0225351	0.391924	0.281901	0.203666	0.294232	0.326888		0.174887	0.0522404	0.0874436	0.0261202		0.283789	0.276672	0.940374
Folium-tuber vermis (VII), molecular layer	0.193462	0.198564	0.0144565	0.212221	0.14584	0.100345	0.161998	0.181842		0.0938144	0.0347175	0.0469072	0.0173588		0.154676	0.147506	0.890713
Folium-tuber vermis (VII), Purkinje layer	0	0	0	0	0	0	0	0		0	0	0	0		0	0	#DIV/0!
Folium-tuber vermis (VII), granular layer	0.160297	0.168375	0.00807862	0.179703	0.136061	0.103321	0.132234	0.145046		0.0810816	0.0180469	0.0405408	0.00902346		0.129113	0.129166	0.999039
Pyramus (VIII)	0.734304	0.729202	0.0973686	0.75347	0.589739	0.0170076	0.428592	0.545955		0.320982	0.261226	0.160491	0.130613		0.578586	0.395323	0.409891
Pyramus (VIII), molecular layer	0.360561	0.347381	0.0323145	0.363685	0.286578	0.00892901	0.210895	0.26656		0.162601	0.126978	0.0813004	0.0634889		0.275985	0.19324	0.453054
Pyramus (VIII), Purkinje layer	0	0	0	0	0	0	0	0		0	0	0	0		0	0	#DIV/0!
Pyramus (VIII), granular layer	0.373742	0.381821	0.0650541	0.389785	0.303161	0.00807863	0.217698	0.279395		0.1585	0.134258	0.0792498	0.0671289		0.302601	0.202083	0.370511
Uvula (IX)	1.69906	1.80961	0.511504	2.12563	1.43842	0.889925	1.02173	1.50993		0.706802	0.305466	0.353401	0.152733		1.53645	1.215	0.435725
Uvula (IX), molecular layer	0.887372	0.929466	0.286578	1.11288	0.73728	0.468135	0.524685	0.795828		0.358619	0.159468	0.179309	0.0797342		0.804073	0.631482	0.412965
Uvula (IX), Purkinje layer	0	0	0	0	0	0	0	0		0	0	0	0		0	0	#DIV/0!
Uvula (IX), granular layer	0.811688	0.880144	0.224926	1.01276	0.701139	0.421789	0.497048	0.714106		0.348446	0.146653	0.174223	0.0733264		0.732379	0.58352	0.460954
Nodulus (X)	1.222	1.35466	1.23135	1.45816	1.01833	1.1089	0.905656	1.19888		0.112109	0.125458	0.0560546	0.0627289		1.31654	1.05794	0.0218295
Nodulus (X), molecular layer	0.616101	0.674352	0.597393	0.746624	0.513205	0.563378	0.454954	0.620831		0.0672034	0.0707495	0.0336017	0.0353747		0.658617	0.538092	0.0484381
Nodulus (X), Purkinje layer	0	0	0	0	0	0	0	0		0	0	0	0		0	0	#DIV/0!
Nodulus (X), granular layer	0.605896	0.680305	0.633959	0.711539	0.505126	0.54552	0.450702	0.578045		0.0471052	0.0549054	0.0235526	0.0274527		0.657925	0.519848	0.00878858
Hemispheric regions	19.1191	23.118	20.8233	24.7409	17.6271	13.3063	13.9522	19.434		2.47902	2.9362	1.23951	1.4681		21.9503	16.0799	0.0223593
Simple lobule	4.1877	4.83739	4.57675	4.85926	3.54056	3.13196	3.40025	3.87602		0.312607	0.309726	0.156303	0.154863		4.61528	3.4872	0.00216351
Simple lobule, molecular layer	2.3547	2.73057	2.57368	2.72635	1.98351	1.77857	1.9006	2.19837		0.176846	0.176734	0.0884231	0.088367		2.59633	1.96526	0.00233796
Simple lobule, Purkinje layer	0	0	0	0	0	0	0	0		0	0	0	0		0	0	#DIV/0!
Simple lobule, granular layer	1.833	2.10682	2.00307	2.13291	1.55705	1.35338	1.49965	1.67766		0.136061	0.134646	0.0680306	0.067323		2.01895	1.52193	0.00202879
Ansiform lobule	6.58492	8.26698	8.22574	8.5051	6.26518	4.60609	5.16734	6.79192		0.882472	0.998639	0.441236	0.49932		7.89568	5.70763	0.0167454
Crus 1	3.71191	4.63968	4.62735	4.63463	3.49719	2.77777	2.97336	3.81227		0.461015	0.474646	0.230507	0.237323		4.40339	3.26515	0.0137932
Crus 1, molecular layer	2.01668	2.54051	2.40063	2.52697	1.8972	1.52133	1.59659	2.06616		0.244597	0.25547	0.122298	0.127735		2.3712	1.77032	0.014535
Crus 1, Purkinje layer	0	0	0	0	0	0	0	0		0	0	0	0		0	0	#DIV/0!
Crus 1, granular layer	1.69523	2.09916	2.22672	2.10766	1.59999	1.25644	1.37677	1.74611		0.232066	0.219827	0.116033	0.109914		2.0322	1.49483	0.0151885
Crus 2	2.87301	3.6273	3.59839	3.87046	2.76799	1.82832	2.19398	2.97965		0.430506	0.527082	0.215253	0.263541		3.49229	2.44249	0.0215206
Crus 2, molecular layer	1.49412	1.91123	1.7841	2.04006	1.4448	0.999199	1.08934	1.53304		0.233523	0.261832	0.116762	0.130916		1.80738	1.26659	0.0215859
Crus 2, Purkinje layer	0	0	0	0	0	0	0	0		0	0	0	0		0	0	#DIV/0!
Crus 2, granular layer	1.37889	1.71607	1.81429	1.83041	1.32319	0.829122	1.10465	1.44661		0.210179	0.270992	0.105089	0.135496		1.68491	1.17589	0.0250054
Paramedian lobule	2.55072	3.23485	2.7901	3.49266	2.44229	1.28663	1.99117	2.77085		0.42529	0.642536	0.212645	0.321268		3.01708	2.12273	0.0593378
Paramedian lobule, molecular layer	1.43077	1.77942	1.48391	1.9532	1.35423	0.72495	1.09402	1.56556		0.247501	0.362117	0.123751	0.181058		1.66183	1.18469	0.0724953
Paramedian lobule, Purkinje layer	0	0	0	0	0	0	0	0		0	0	0	0		0	0	#DIV/0!
Paramedian lobule, granular layer	1.11995	1.45543	1.30619	1.53946	1.08806	0.561677	0.897152	1.20529		0.184156	0.281219	0.0920781	0.140609		1.35526	0.938046	0.0476586
Copula pyramidis	1.53069	1.76199	0.910333	2.12264	1.34105	0.393302	1.17438	1.60192		0.509396	0.520233	0.254698	0.260116		1.58141	1.12766	0.259075
Copula pyramidis, molecular layer	0.767469	0.898002	0.503	1.08592	0.684982	0.224926	0.589739	0.837331		0.244869	0.260346	0.122435	0.130173		0.813598	0.584244	0.246681
Copula pyramidis, Purkinje layer	0	0	0	0	0	0	0	0		0	0	0	0		0	0	#DIV/0!
Copula pyramidis, granular layer	0.763217	0.863987	0.407332	1.03672	0.656069	0.168376	0.584637	0.764594		0.265535	0.260746	0.132767	0.130373		0.767813	0.543419	0.273236
Paraflocculus	3.0822	3.87901	3.18085	4.39246	3.02736	2.92234	1.3368	3.33306		0.617823	0.895831	0.308911	0.447916		3.63363	2.65489	0.122155
Paraflocculus, molecular layer	1.59999	1.98266	1.55322	2.2848	1.55322	1.4414	0.727501	1.72001		0.345024	0.437273	0.172512	0.218637		1.85517	1.36053	0.126061
Paraflocculus, Purkinje layer	0	0	0	0	0	0	0	0		0	0	0	0		0	0	#DIV/0!
Paraflocculus, granular layer	1.48221	1.89635	1.62763	2.10766	1.47414	1.48094	0.609298	1.61305		0.278558	0.461159	0.139279	0.23058		1.77846	1.29436	0.12244
Flocculus	1.18288	1.13781	1.13951	1.36874	1.01068	0.966034	0.88227	1.06025		0.109671	0.0755575	0.0548357	0.0377788		1.20723	0.979807	0.0142247
Flocculus, molecular layer	0.610573	0.591015	0.589739	0.712395	0.523835	0.494497	0.451127	0.548522		0.0584262	0.0418748	0.0292131	0.0209374		0.625931	0.504495	0.0148815
Flocculus, Purkinje layer	0	0	0	0	0	0	0	0		0	0	0	0		0	0	#DIV/0!
Flocculus, granular layer	0.572306	0.546795	0.549771	0.656345	0.486843	0.471537	0.431143	0.511726		0.0513071	0.0337839	0.0256535	0.016892		0.581304	0.475312	0.0136202
Cerebellar cortex, molecular layer	0	0	0	0	0	0	0	0		0	0	0	0		0	0	#DIV/0!
Cerebellar cortex, Purkinje layer	0	0	0	0	0	0	0	0		0	0	0	0		0	0	#DIV/0!
Cerebellar cortex, granular layer	0	0	0	0	0	0	0	0		0	0	0	0		0	0	#DIV/0!
Cerebellar nuclei	1.01918	1.04214	1.02258	1.10817	0.912459	0.647141	0.672651	0.815509		0.0413572	0.124736	0.0206786	0.0623678		1.04802	0.76194	0.00480224
Fastigial nucleus	0.360987	0.357585	0.349932	0.392352	0.319743	0.199415	0.231729	0.262281		0.0186734	0.0512	0.00933671	0.0256		0.365214	0.253292	0.00630537
Interposed nucleus	0.446025	0.460906	0.436671	0.475358	0.395427	0.288279	0.289555	0.361973		0.016986	0.0536078	0.00849302	0.0268039		0.45474	0.333809	0.00508745
Dentate nucleus	0.21217	0.22365	0.235981	0.24046	0.197288	0.159447	0.151368	0.191255		0.0127598	0.022813	0.0063799	0.0114065		0.228065	0.17484	0.00655714
fiber tracts	25.7767	28.1374	35.287	31.0835	22.2532	32.7559	24.536	24.2514		4.09924	4.65012	2.04962	2.32506		30.0712	25.9491	0.231867
cranial nerves	7.69637	8.98597	11.0613	10.4022	6.98758	10.9627	7.02457	8.29629		1.50153	1.86529	0.750766	0.932643		9.53648	8.31778	0.348005
terminal nerve	0	0	0	0	0	0	0	0		0	0	0	0		0	0	#DIV/0!
vomeronasal nerve	0.015732	0.0272122	0.0280626	0.025244	0.0153069	0.0403931	0.0114801	0.0213932		0.00567784	0.012833	0.00283892	0.00641651		0.0240627	0.0221433	0.793602
olfactory nerve	2.32664	3.05882	3.94619	3.64027	2.3951	4.06993	2.47631	3.02372		0.713195	0.771397	0.356598	0.385698		3.24298	2.99126	0.648759
olfactory nerve layer of main olfactory bulb	1.08424	1.50432	1.56683	1.92069	1.2305	1.34956	1.04044	1.59593		0.342965	0.232498	0.171482	0.116249		1.51902	1.30411	0.339558
lateral olfactory tract, general	0.544669	0.675628	1.02428	0.768017	0.517457	1.17905	0.50215	0.612702		0.202656	0.321221	0.101328	0.16061		0.753149	0.702841	0.799939
lateral olfactory tract, body	0.538716	0.667124	1.00473	0.757749	0.508953	1.16375	0.497048	0.604572		0.196811	0.317118	0.0984053	0.158559		0.742078	0.69358	0.80364
dorsal limb	0.00595266	0.00850381	0.0195588	0.0102688	0.00850381	0.0153069	0.00510229	0.00812942		0.00592941	0.00430895	0.0029647	0.00215448		0.011071	0.0092606	0.638876
accessory olfactory tract	0	0	0	0	0	0	0	0		0	0	0	0		0	0	#DIV/0!
anterior commissure, olfactory limb	0.697737	0.878869	1.35508	0.951571	0.64714	1.54132	0.933718	0.815082		0.277523	0.389503	0.138762	0.194752		0.970815	0.984314	0.956815
optic nerve	1.0617	1.13909	1.5698	1.23867	0.908632	1.40356	1.05362	0.972964		0.223711	0.220695	0.111856	0.110348		1.25231	1.08469	0.327094
accessory optic tract	0	0	0	0	0	0	0	0		0	0	0	0		0	0	#DIV/0!
brachium of the superior colliculus	0.287854	0.343129	0.31294	0.344859	0.264043	0.295508	0.332499	0.265276		0.0271836	0.0322477	0.0135918	0.0161239		0.322195	0.289331	0.170151
superior colliculus commissure	0.0221099	0.0212595	0.0280626	0.0256719	0.0182832	0.0233855	0.0170076	0.0179703		0.00316637	0.00286774	0.00158319	0.00143387		0.024276	0.0191617	0.0537067
optic chiasm	0.103746	0.113101	0.238107	0.136917	0.0863137	0.225351	0.08929	0.0924187		0.0616938	0.0680509	0.0308469	0.0340254		0.147968	0.123343	0.61113
optic tract	0.64799	0.661596	0.990694	0.731221	0.539992	0.859311	0.614826	0.597299		0.159436	0.141297	0.0797179	0.0706487		0.757875	0.652857	0.362246
tectothalamic pathway	0	0	0	0	0	0	0	0		0	0	0	0		0	0	#DIV/0!
oculomotor nerve	0.844428	0.926915	0.855058	1.12443	0.781925	0.987718	0.755564	0.785559		0.12976	0.107519	0.0648802	0.0537593		0.937707	0.827692	0.239483
medial longitudinal fascicle	0.813389	0.89375	0.818917	1.08421	0.756839	0.95838	0.721123	0.76331		0.12652	0.107261	0.0632599	0.0536306		0.902566	0.799913	0.262037
posterior commissure	0.0310389	0.0331649	0.0361412	0.0402193	0.0250862	0.0293382	0.0344404	0.0222489		0.00398003	0.00531157	0.00199001	0.00265578		0.0351411	0.0277784	0.0683327
trochlear nerve	0	0	0	0	0	0	0	0		0	0	0	0		0	0	#DIV/0!
trochlear nerve decussation	0	0	0	0	0	0	0	0		0	0	0	0		0	0	#DIV/0!
abducens nerve	0	0	0	0	0	0	0	0		0	0	0	0		0	0	#DIV/0!
trigeminal nerve	1.12718	1.239	1.74371	1.39227	0.956678	1.51623	1.04342	1.10646		0.268422	0.248075	0.134211	0.124038		1.37554	1.1557	0.274297
motor root of the trigeminal nerve	0.133935	0.146265	0.221099	0.142479	0.104597	0.206218	0.0297633	0.108678		0.0404332	0.0723539	0.0202166	0.036177		0.160945	0.112314	0.285083
sensory root of the trigeminal nerve	0.91501	1.01365	1.4027	1.14112	0.787453	1.20882	0.95923	0.904505		0.211095	0.177635	0.105548	0.0888177		1.11812	0.965001	0.309493
midbrain tract of the trigeminal nerve	0.0119053	0.0153069	0.017858	0.0141195	0.0127557	0.0148817	0.00127557	0.0128359		0.00247995	0.0061865	0.00123997	0.00309325		0.0147974	0.0104372	0.238627
spinal tract of the trigeminal nerve	0.903104	0.998347	1.38485	1.127	0.774697	1.19394	0.957954	0.891669		0.208904	0.176653	0.104452	0.0883263		1.10332	0.954564	0.318563
facial nerve	0.167525	0.185383	0.307413	0.20837	0.143289	0.30146	0.0454954	0.154031		0.0624399	0.105566	0.03122	0.0527831		0.217173	0.161069	0.395543
intermediate nerve	0	0	0	0	0	0	0	0		0	0	0	0		0	0	#DIV/0!
genu of the facial nerve	0.071432	0.0722824	0.119053	0.0804386	0.0556999	0.121179	0.00807862	0.0611846		0.0225366	0.0463653	0.0112683	0.0231826		0.0858016	0.0615356	0.382835
vestibulocochlear nerve	1.54514	1.72797	2.05027	2.03065	1.30108	1.95885	0.820193	1.63872		0.244977	0.487078	0.122489	0.243539		1.83851	1.42971	0.184388
efferent cochleovestibular bundle	0	0	0	0	0	0	0	0		0	0	0	0		0	0	#DIV/0!
vestibular nerve	0.104597	0.114376	0.197288	0.112528	0.0897152	0.210469	0.0697312	0.0932744		0.0436008	0.0639595	0.0218004	0.0319798		0.132197	0.115798	0.686532
cochlear nerve	1.41503	1.58468	1.81429	1.88218	1.19138	1.71139	0.714745	1.51721		0.214522	0.435767	0.107261	0.217884		1.67405	1.28368	0.159091
trapezoid body	0.252138	0.277649	0.426041	0.350849	0.209619	0.40053	0.266169	0.266987		0.0783523	0.0810468	0.0391762	0.0405234		0.326669	0.285826	0.495955
intermediate acoustic stria	0	0	0	0	0	0	0	0		0	0	0	0		0	0	#DIV/0!
dorsal acoustic stria	0	0	0	0	0	0	0	0		0	0	0	0		0	0	#DIV/0!
lateral lemniscus	0.834223	0.928616	1.03959	1.16336	0.720698	0.931168	0.257665	0.924615		0.142057	0.316063	0.0710284	0.158031		0.991449	0.708537	0.153614
inferior colliculus commissure	0.00255114	0.00340152	0.00382671	0.00128359	0.00212595	0.00382672	0.000850381	0.000855729		0.00112141	0.00140886	0.000560706	0.000704429		0.00276574	0.00191469	0.381022
brachium of the inferior colliculus	0.326121	0.375018	0.344829	0.36668	0.258941	0.375869	0.19006	0.324749		0.0220686	0.0806363	0.0110343	0.0403181		0.353162	0.287405	0.166755
glossopharyngeal nerve	0	0	0	0	0	0	0	0		0	0	0	0		0	0	#DIV/0!
vagus nerve	0.0306137	0.0340152	0.0518732	0.0385078	0.0272122	0.0314641	0.0165824	0.0299505		0.00932551	0.0067146	0.00466275	0.0033573		0.0387525	0.0263023	0.0733769
solitary tract	0.0306137	0.0340152	0.0518732	0.0385078	0.0272122	0.0314641	0.0165824	0.0299505		0.00932551	0.0067146	0.00466275	0.0033573		0.0387525	0.0263023	0.0733769
accessory spinal nerve	0	0	0	0	0	0	0	0		0	0	0	0		0	0	#DIV/0!
hypoglossal nerve	0	0	0	0	0	0	0	0		0	0	0	0		0	0	#DIV/0!
ventral roots	0	0	0	0	0	0	0	0		0	0	0	0		0	0	#DIV/0!
dorsal roots	0.777248	0.868664	0.855908	0.976387	0.630557	0.971561	0.929467	0.777857		0.0818959	0.155351	0.0409479	0.0776753		0.869552	0.827361	0.647891
cervicothalamic tract	0.777248	0.868664	0.855908	0.976387	0.630557	0.971561	0.929467	0.777857		0.0818959	0.155351	0.0409479	0.0776753		0.869552	0.827361	0.647891
dorsolateral fascicle	0	0	0	0	0	0	0	0		0	0	0	0		0	0	#DIV/0!
dorsal commissure of the spinal cord	0	0	0	0	0	0	0	0		0	0	0	0		0	0	#DIV/0!
ventral commissure of the spinal cord	0	0	0	0	0	0	0	0		0	0	0	0		0	0	#DIV/0!
fasciculus proprius	0	0	0	0	0	0	0	0		0	0	0	0		0	0	#DIV/0!
dorsal column	0.0318893	0.0352908	0	0.0427865	0.0314641	0	0.0557	0.0325177		0.0188846	0.0228688	0.00944232	0.0114344		0.0274916	0.0299204	0.875278
cuneate fascicle	0.026787	0.0289129	0	0.034657	0.0255114	0	0.0480465	0.0273833		0.015422	0.0196796	0.00771101	0.00983981		0.0225892	0.0252353	0.839376
gracile fascicle	0.00510228	0.00637786	0	0.00812943	0.00595267	0	0.00765343	0.00513437		0.00349591	0.00329493	0.00174796	0.00164747		0.00490239	0.00468512	0.930868
internal arcuate fibers	0	0	0	0	0	0	0	0		0	0	0	0		0	0	#DIV/0!
medial lemniscus	0.745359	0.833373	0.855908	0.933601	0.599093	0.971561	0.873767	0.74534		0.0774557	0.161452	0.0387278	0.0807258		0.84206	0.79744	0.635972
spinothalamic tract	0	0	0	0	0	0	0	0		0	0	0	0		0	0	#DIV/0!
lateral spinothalamic tract	0	0	0	0	0	0	0	0		0	0	0	0		0	0	#DIV/0!
ventral spinothalamic tract	0	0	0	0	0	0	0	0		0	0	0	0		0	0	#DIV/0!
spinocervical tract	0	0	0	0	0	0	0	0		0	0	0	0		0	0	#DIV/0!
spino-olivary pathway	0	0	0	0	0	0	0	0		0	0	0	0		0	0	#DIV/0!
spinoreticular pathway	0	0	0	0	0	0	0	0		0	0	0	0		0	0	#DIV/0!
spinovestibular pathway	0	0	0	0	0	0	0	0		0	0	0	0		0	0	#DIV/0!
spinotectal pathway	0	0	0	0	0	0	0	0		0	0	0	0		0	0	#DIV/0!
spinohypothalamic pathway	0	0	0	0	0	0	0	0		0	0	0	0		0	0	#DIV/0!
spinotelenchephalic pathway	0	0	0	0	0	0	0	0		0	0	0	0		0	0	#DIV/0!
hypothalamohypophysial tract	0	0	0	0	0	0	0	0		0	0	0	0		0	0	#DIV/0!
cerebellum related fiber tracts	6.98758	7.34814	10.8925	8.17265	6.15676	9.14501	4.76469	6.14328		1.76596	1.84765	0.882979	0.923826		8.35022	6.55243	0.209114
cerebellar commissure	0.273397	0.248736	0.332499	0.311486	0.242359	0.377995	0.209194	0.209226		0.03758	0.0804009	0.01879	0.0402004		0.29153	0.259693	0.500067
cerebellar peduncles	1.96608	2.1183	2.55327	2.61554	1.6812	2.74801	1.74796	2.01011		0.320167	0.488538	0.160083	0.244269		2.3133	2.04682	0.396721
superior cerebelar peduncles	1.1072	1.24751	1.36146	1.299	0.96093	1.48137	0.995796	1.038		0.108268	0.243608	0.054134	0.121804		1.25379	1.11902	0.351003
superior cerebellar peduncle decussation	0.192186	0.213871	0.204091	0.220778	0.163698	0.186234	0.0335901	0.180131		0.0124207	0.0721789	0.00621034	0.0360895		0.207732	0.140913	0.117859
spinocerebellar tract	0	0	0	0	0	0	0	0		0	0	0	0		0	0	#DIV/0!
uncinate fascicle	0	0	0	0	0	0	0	0		0	0	0	0		0	0	#DIV/0!
ventral spinocerebellar tract	0.729201	0.818917	0.912459	0.868566	0.64714	0.980065	0.915435	0.698275		0.0786322	0.162321	0.0393161	0.0811606		0.832286	0.810229	0.814929
middle cerebellar peduncle	1.23688	1.29938	1.64081	1.74697	1.03406	1.76794	0.832523	1.31183		0.250906	0.405087	0.125453	0.202543		1.48101	1.23659	0.344506
inferior cerebellar peduncle	0.537015	0.653518	0.988143	0.715818	0.508528	0.883121	0.517032	0.56307		0.191284	0.178405	0.095642	0.0892027		0.723623	0.617938	0.449881
dorsal spinocerebellar tract	0	0	0	0	0	0	0	0		0	0	0	0		0	0	#DIV/0!
cuneocerebellar tract	0	0	0	0	0	0	0	0		0	0	0	0		0	0	#DIV/0!
juxtarestiform body	0	0	0	0	0	0	0	0		0	0	0	0		0	0	#DIV/0!
bulbocerebellar tract	0	0	0	0	0	0	0	0		0	0	0	0		0	0	#DIV/0!
olivocerebellar tract	0	0	0	0	0	0	0	0		0	0	0	0		0	0	#DIV/0!
reticulocerebellar tract	0	0	0	0	0	0	0	0		0	0	0	0		0	0	#DIV/0!
trigeminocerebellar tract	0	0	0	0	0	0	0	0		0	0	0	0		0	0	#DIV/0!
arbor vitae	4.7481	4.98111	8.00676	5.24562	4.2332	6.019	2.80753	3.92394		1.52122	1.33124	0.760608	0.66562		5.7454	4.24592	0.188452
lateral forebrain bundle system	5.82766	6.16016	6.82983	6.91515	4.81316	6.59301	6.21969	5.40778		0.526253	0.801204	0.263127	0.400602		6.4332	5.75841	0.208802
corpus callosum	4.95134	5.03425	6.00709	4.88964	3.76974	5.8974	5.27534	3.67407		0.527677	1.10669	0.263838	0.553344		5.22058	4.65414	0.391125
corpus callosum, anterior forceps	2.21567	2.34918	2.48779	2.42514	1.75561	2.43422	2.27775	1.95192		0.11714	0.307534	0.0585702	0.153767		2.36944	2.10487	0.158983
external capsule	1.50432	1.64464	1.79983	1.65455	1.17735	1.65229	1.26494	1.37002		0.120717	0.206381	0.0603585	0.103191		1.65084	1.36615	0.0546667
corpus callosum, extreme capsule	0	0	0	0	0	0	0	0		0	0	0	0		0	0	#DIV/0!
genu of corpus callosum	0.429442	0.398403	0.363538	0.38465	0.323145	0.503851	0.466009	0.287525		0.0276339	0.105838	0.0138169	0.0529189		0.394008	0.395132	0.984271
corpus callosum, posterior forceps	0.282326	0.28998	0.498323	0.309774	0.238107	0.342279	0.336326	0.221634		0.102801	0.063584	0.0514004	0.031792		0.345101	0.284586	0.35535
corpus callosum, rostrum	0	0	0	0	0	0	0	0		0	0	0	0		0	0	#DIV/0!
corpus callosum, splenium	0.0850381	0.0952426	0.15647	0.0992646	0.0761091	0.121605	0.117778	0.0616125		0.0322057	0.0299785	0.0161029	0.0149892		0.109004	0.094276	0.528106
corticospinal tract	3.44744	3.65791	3.98021	4.42583	2.93211	3.93897	3.87646	3.41906		0.425983	0.467805	0.212992	0.233902		3.87785	3.54165	0.328787
internal capsule	1.77007	1.81556	1.86489	2.02466	1.43289	1.94695	2.1791	1.63145		0.110889	0.330892	0.0554443	0.165446		1.86879	1.7976	0.697417
cerebal peduncle	1.38357	1.50602	1.85298	1.9562	1.24071	1.68248	1.42354	1.47913		0.273394	0.181872	0.136697	0.0909362		1.67469	1.45646	0.232088
corticotectal tract	0	0	0	0	0	0	0	0		0	0	0	0		0	0	#DIV/0!
corticorubral tract	0	0	0	0	0	0	0	0		0	0	0	0		0	0	#DIV/0!
corticopontine tract	0	0	0	0	0	0	0	0		0	0	0	0		0	0	#DIV/0!
corticobulbar tract	0	0	0	0	0	0	0	0		0	0	0	0		0	0	#DIV/0!
pyramid	0.17858	0.197714	0.11055	0.262709	0.159021	0.137762	0.192186	0.177564		0.0626142	0.0235508	0.0313071	0.0117754		0.187388	0.166633	0.557745
pyramidal decussation	0	0	0	0	0	0	0	0		0	0	0	0		0	0	#DIV/0!
corticospinal tract, crossed	0	0	0	0	0	0	0	0		0	0	0	0		0	0	#DIV/0!
corticospinal tract, uncrossed	0	0	0	0	0	0	0	0		0	0	0	0		0	0	#DIV/0!
thalamus related	0.194312	0.212595	0.183257	0.223345	0.165824	0.205792	0.239807	0.178847		0.0179879	0.0327106	0.00899397	0.0163553		0.203377	0.197568	0.766139
external medullary lamina of the thalamus	0.184107	0.199414	0.171352	0.210082	0.15732	0.193037	0.223225	0.167295		0.0170122	0.0294685	0.00850608	0.0147342		0.191239	0.185219	0.735581
internal medullary lamina of the thalamus	0.0102046	0.0131809	0.0119053	0.0132638	0.00850381	0.0127557	0.0165824	0.0115523		0.00143148	0.00334203	0.000715739	0.00167102		0.0121387	0.0123486	0.911834
middle thalamic commissure	0	0	0	0	0	0	0	0		0	0	0	0		0	0	#DIV/0!
thalamic peduncles	0	0	0	0	0	0	0	0		0	0	0	0		0	0	#DIV/0!
extrapyramidal fiber systems	0.0948174	0.101621	0.0807862	0.129215	0.0837625	0.102046	0.0591015	0.0847171		0.0203455	0.0176636	0.0101727	0.00883178		0.10161	0.0824067	0.203912
cerebral nuclei related	0	0	0	0	0	0	0	0		0	0	0	0		0	0	#DIV/0!
pallidothalmic pathway	0	0	0	0	0	0	0	0		0	0	0	0		0	0	#DIV/0!
nigrostriatal tract	0	0	0	0	0	0	0	0		0	0	0	0		0	0	#DIV/0!
nigrothalamic fibers	0	0	0	0	0	0	0	0		0	0	0	0		0	0	#DIV/0!
pallidotegmental fascicle	0	0	0	0	0	0	0	0		0	0	0	0		0	0	#DIV/0!
striatonigral pathway	0	0	0	0	0	0	0	0		0	0	0	0		0	0	#DIV/0!
subthalamic fascicle	0	0	0	0	0	0	0	0		0	0	0	0		0	0	#DIV/0!
tectospinal pathway	0.167525	0.199839	0.208343	0.181415	0.13436	0.179856	0.0382671	0.148897		0.018349	0.0610735	0.0091745	0.0305368		0.189281	0.125345	0.0917649
direct tectospinal pathway	0	0	0	0	0	0	0	0		0	0	0	0		0	0	#DIV/0!
doral tegmental decussation	0.0306137	0.0340152	0.026787	0.0372242	0.0242359	0.0276374	0.0123305	0.028239		0.00448511	0.00739976	0.00224255	0.00369988		0.03216	0.0231107	0.0814143
crossed tectospinal pathway	0	0	0	0	0	0	0	0		0	0	0	0		0	0	#DIV/0!
rubrospinal tract	0.335475	0.370341	0.426466	0.409894	0.292531	0.43497	0.277649	0.324749		0.0408476	0.0711017	0.0204238	0.0355508		0.385544	0.332475	0.243118
ventral tegmental decussation	0.0642037	0.0676053	0.0539992	0.0919909	0.0595267	0.0744084	0.046771	0.0564781		0.0161012	0.0114492	0.00805061	0.00572462		0.0694498	0.059296	0.343652
rubroreticular tract	0	0	0	0	0	0	0	0		0	0	0	0		0	0	#DIV/0!
central tegmental bundle	0	0	0	0	0	0	0	0		0	0	0	0		0	0	#DIV/0!
retriculospinal tract	0	0	0	0	0	0	0	0		0	0	0	0		0	0	#DIV/0!
retriculospinal tract, lateral part	0	0	0	0	0	0	0	0		0	0	0	0		0	0	#DIV/0!
retriculospinal tract, medial part	0	0	0	0	0	0	0	0		0	0	0	0		0	0	#DIV/0!
vestibulospinal pathway	0	0	0	0	0	0	0	0		0	0	0	0		0	0	#DIV/0!
medial forebrain bundle system	5.17031	5.54151	6.4225	5.46426	4.21194	5.9531	6.468	4.31929		0.539484	1.14325	0.269742	0.571627		5.64965	5.23808	0.539082
cerebrum related	4.49639	4.743	5.64313	4.66116	3.63878	5.20476	5.51047	3.68006		0.515119	0.988509	0.25756	0.494254		4.88592	4.50852	0.523546
amygdalar capsule	0.143714	0.14499	0.163273	0.161305	0.107998	0.142014	0.0986442	0.131354		0.0104001	0.0201133	0.00520004	0.0100567		0.153321	0.120003	0.0258506
ansa peduncularis	0	0	0	0	0	0	0	0		0	0	0	0		0	0	#DIV/0!
anterior commissure, temporal limb	0.133935	0.14414	0.168801	0.153603	0.11055	0.152218	0.139462	0.10611		0.0148192	0.0223476	0.00740958	0.0111738		0.15012	0.127085	0.136591
cingulum bundle	0.382246	0.389049	0.604196	0.346143	0.286578	0.542544	0.492796	0.247306		0.117378	0.147052	0.0586891	0.0735261		0.430408	0.392306	0.699512
fornix system	3.26419	3.48103	4.15879	3.36516	2.66637	3.77399	4.13243	2.70111		0.404162	0.747529	0.202081	0.373765		3.56729	3.31847	0.579492
alveus	1.03874	1.14164	1.47626	1.10304	0.813389	1.17608	1.20542	0.872843		0.195557	0.202521	0.0977783	0.101261		1.18992	1.01693	0.26511
dorsal fornix	0.0897152	0.087164	0.155195	0.0723092	0.0701564	0.128833	0.136486	0.050488		0.0368735	0.0426435	0.0184367	0.0213217		0.101096	0.0964909	0.875594
fimbria	1.24071	1.28578	1.30193	1.25921	1.06553	1.36019	1.67057	1.01019		0.0272566	0.304264	0.0136283	0.152132		1.27191	1.27662	0.976383
precommissural fornix, general	0	0	0	0	0	0	0	0		0	0	0	0		0	0	#DIV/0!
precommissural fornix diagonal band	0	0	0	0	0	0	0	0		0	0	0	0		0	0	#DIV/0!
postcommissural fornix	0.258941	0.253413	0.310389	0.264848	0.187084	0.310389	0.30061	0.221634		0.0260821	0.0602056	0.013041	0.0301028		0.271898	0.254929	0.623494
medial corticohypothalmic tract	0	0	0	0	0	0	0	0		0	0	0	0		0	0	#DIV/0!
columns of the fornix	0.258941	0.253413	0.310389	0.264848	0.187084	0.310389	0.30061	0.221634		0.0260821	0.0602056	0.013041	0.0301028		0.271898	0.254929	0.623494
hippocampal commissures	0.636085	0.713044	0.91501	0.665758	0.530212	0.798508	0.819342	0.545955		0.12575	0.156733	0.0628748	0.0783667		0.732474	0.673505	0.578652
dorsal hippocampal commissure	0.504276	0.569755	0.751737	0.545528	0.419663	0.599944	0.578259	0.442412		0.109336	0.0921561	0.0546681	0.046078		0.592824	0.51007	0.291078
ventral hippocampal commissure	0.131809	0.143289	0.163273	0.12023	0.11055	0.198564	0.241083	0.103543		0.0183477	0.0674467	0.00917385	0.0337234		0.13965	0.163435	0.521535
perforant path	0	0	0	0	0	0	0	0		0	0	0	0		0	0	#DIV/0!
angular path	0	0	0	0	0	0	0	0		0	0	0	0		0	0	#DIV/0!
longitudinal association bundle	0	0	0	0	0	0	0	0		0	0	0	0		0	0	#DIV/0!
stria terminalis	0.572306	0.583786	0.548071	0.634951	0.467284	0.593992	0.64714	0.494183		0.0366121	0.0843152	0.018306	0.0421576		0.584779	0.55065	0.485788
hypothalamus related	0.673927	0.798508	0.779374	0.803102	0.573157	0.748336	0.957529	0.639229		0.0607427	0.16827	0.0303713	0.0841349		0.763728	0.729563	0.715661
medial forebrain bundle	0	0	0	0	0	0	0	0		0	0	0	0		0	0	#DIV/0!
ventrolateral hypothalamic tract	0	0	0	0	0	0	0	0		0	0	0	0		0	0	#DIV/0!
preoptic commissure	0	0	0	0	0	0	0	0		0	0	0	0		0	0	#DIV/0!
supraoptic commissures	0	0	0	0	0	0	0	0		0	0	0	0		0	0	#DIV/0!
supraoptic commissures, anterior	0	0	0	0	0	0	0	0		0	0	0	0		0	0	#DIV/0!
supraoptic commissures, dorsal	0	0	0	0	0	0	0	0		0	0	0	0		0	0	#DIV/0!
supraoptic commissures, ventral	0	0	0	0	0	0	0	0		0	0	0	0		0	0	#DIV/0!
premammillary commissure	0	0	0	0	0	0	0	0		0	0	0	0		0	0	#DIV/0!
supramammillary decussation	0.0131809	0.0191336	0.0212595	0.0239604	0.0161572	0.0174328	0.0216847	0.0179703		0.00458266	0.00237402	0.00229133	0.00118701		0.0193836	0.0183113	0.692194
propriohypothalamic pathways	0	0	0	0	0	0	0	0		0	0	0	0		0	0	#DIV/0!
propriohypothalamic pathways, dorsal	0	0	0	0	0	0	0	0		0	0	0	0		0	0	#DIV/0!
propriohypothalamic pathways, lateral	0	0	0	0	0	0	0	0		0	0	0	0		0	0	#DIV/0!
propriohypothalamic pathways, medial	0	0	0	0	0	0	0	0		0	0	0	0		0	0	#DIV/0!
propriohypothalamic pathways, ventral	0	0	0	0	0	0	0	0		0	0	0	0		0	0	#DIV/0!
periventricular bundle of the hypothalamus	0	0	0	0	0	0	0	0		0	0	0	0		0	0	#DIV/0!
mammillary related	0.161147	0.221949	0.220249	0.237893	0.147541	0.198564	0.175179	0.198101		0.0337246	0.0241455	0.0168623	0.0120727		0.21031	0.179846	0.192242
principal mammillary tract	0.008929	0.0123305	0.0208343	0.0192539	0.008929	0.0136061	0.0157321	0.0175424		0.00564696	0.00371528	0.00282348	0.00185764		0.0153369	0.0139524	0.696282
mammilothalmic tract	0.0807862	0.113951	0.11055	0.103543	0.0705816	0.0952428	0.0901404	0.100976		0.0149238	0.0131999	0.00746189	0.00659995		0.102207	0.0892352	0.240601
mammillotegmental tract	0.0539992	0.0739831	0.0608022	0.0860008	0.0539992	0.0663298	0.0484717	0.0594731		0.0142094	0.00763498	0.00710469	0.00381749		0.0686963	0.0570685	0.199471
mammillary peduncle	0.0174328	0.0216847	0.0280626	0.0290948	0.0140313	0.0233855	0.0208343	0.0201096		0.00550549	0.00396331	0.00275275	0.00198166		0.0240687	0.0195902	0.234837
dorsal thalamus related	0	0	0	0	0	0	0	0		0	0	0	0		0	0	#DIV/0!
periventricular bundle of the thalamus	0	0	0	0	0	0	0	0		0	0	0	0		0	0	#DIV/0!
epithalamus related	0.499599	0.557425	0.537866	0.541249	0.409458	0.532339	0.760666	0.423158		0.0244925	0.162429	0.0122463	0.0812147		0.534035	0.531405	0.9755
stria medullaris	0.316342	0.321444	0.331223	0.313197	0.24491	0.339728	0.488544	0.241743		0.00788452	0.115836	0.00394226	0.057918		0.320551	0.328731	0.892559
fasciculus retroflexus	0.156045	0.205367	0.173478	0.201952	0.145415	0.169651	0.237256	0.160449		0.0235999	0.040623	0.0117999	0.0203115		0.18421	0.178193	0.806377
habenular commissure	0.0272122	0.0306137	0.0331649	0.0260998	0.0191336	0.0229603	0.0348656	0.0209654		0.00322803	0.00709713	0.00161401	0.00354856		0.0292726	0.0244812	0.265054
pineal stalk	0	0	0	0	0	0	0	0		0	0	0	0		0	0	#DIV/0!
midbrain related	0	0	0	0	0	0	0	0		0	0	0	0		0	0	#DIV/0!
dorsal longitudinal fascicle	0	0	0	0	0	0	0	0		0	0	0	0		0	0	#DIV/0!
dorsal tegmental tract	0	0	0	0	0	0	0	0		0	0	0	0		0	0	#DIV/0!
ventricular systems	0	0	0	0	0	0	0	0		0	0	0	0		0	0	#DIV/0!
lateral ventricle	0	0	0	0	0	0	0	0		0	0	0	0		0	0	#DIV/0!
rhinocele	0	0	0	0	0	0	0	0		0	0	0	0		0	0	#DIV/0!
subependymal zone	0	0	0	0	0	0	0	0		0	0	0	0		0	0	#DIV/0!
choroid plexus	0	0	0	0	0	0	0	0		0	0	0	0		0	0	#DIV/0!
choroid fissure	0	0	0	0	0	0	0	0		0	0	0	0		0	0	#DIV/0!
interventricular foramen	0	0	0	0	0	0	0	0		0	0	0	0		0	0	#DIV/0!
third ventricle	0	0	0	0	0	0	0	0		0	0	0	0		0	0	#DIV/0!
cerebral aqueduct	0	0	0	0	0	0	0	0		0	0	0	0		0	0	#DIV/0!
fourth ventricle	0	0	0	0	0	0	0	0		0	0	0	0		0	0	#DIV/0!
lateral recess	0	0	0	0	0	0	0	0		0	0	0	0		0	0	#DIV/0!
central canal, spinal cord/medulla	0	0	0	0	0	0	0	0		0	0	0	0		0	0	#DIV/0!
grooves	0	0	0	0	0	0	0	0		0	0	0	0		0	0	#DIV/0!
grooves of the cerebral cortex	0	0	0	0	0	0	0	0		0	0	0	0		0	0	#DIV/0!
endorhinal groove	0	0	0	0	0	0	0	0		0	0	0	0		0	0	#DIV/0!
hippocampal fissure	0	0	0	0	0	0	0	0		0	0	0	0		0	0	#DIV/0!
rhinal fissure	0	0	0	0	0	0	0	0		0	0	0	0		0	0	#DIV/0!
rhinal incisure	0	0	0	0	0	0	0	0		0	0	0	0		0	0	#DIV/0!
grooves of the cerebellar cortex	0	0	0	0	0	0	0	0		0	0	0	0		0	0	#DIV/0!
precentral fissure	0	0	0	0	0	0	0	0		0	0	0	0		0	0	#DIV/0!
preculminate fissure	0	0	0	0	0	0	0	0		0	0	0	0		0	0	#DIV/0!
primary fissure	0	0	0	0	0	0	0	0		0	0	0	0		0	0	#DIV/0!
posterior superior fissure	0	0	0	0	0	0	0	0		0	0	0	0		0	0	#DIV/0!
prepyramidal fissure	0	0	0	0	0	0	0	0		0	0	0	0		0	0	#DIV/0!
secondary fissure	0	0	0	0	0	0	0	0		0	0	0	0		0	0	#DIV/0!
posterolateral fissure	0	0	0	0	0	0	0	0		0	0	0	0		0	0	#DIV/0!
nodular fissure	0	0	0	0	0	0	0	0		0	0	0	0		0	0	#DIV/0!
simple fissure	0	0	0	0	0	0	0	0		0	0	0	0		0	0	#DIV/0!
intercrural fissure	0	0	0	0	0	0	0	0		0	0	0	0		0	0	#DIV/0!
ansoparamedian fissure	0	0	0	0	0	0	0	0		0	0	0	0		0	0	#DIV/0!
intraparafloccular fissure	0	0	0	0	0	0	0	0		0	0	0	0		0	0	#DIV/0!
paramedian sulcus	0	0	0	0	0	0	0	0		0	0	0	0		0	0	#DIV/0!
parafloccular sulcus	0	0	0	0	0	0	0	0		0	0	0	0		0	0	#DIV/0!
Interpeduncular fossa	0	0	0	0	0	0	0	0		0	0	0	0		0	0	#DIV/0!
#brainvol	387.219	427.39	503.317	453.693	326.707	483.054	317.367	359.525		48.6747	76.4295	24.3374	38.2147		442.905	371.663	0.166909
#maskvol	387.219	427.39	503.317	453.693	326.707	483.054	317.367	359.525		48.6747	76.4295	24.3374	38.2147		442.905	371.663	0.166909

## Sheet: 7 area to detail
coarse area (Komaki)	detailed area (Shiohama)	T.TEST	Boferoni補正 (n=175, p<0.000285714)	Boferoni補正 (n=167, p<0.000299401) (peri除く場合)	補正P (n=167)
SS	Somatosensory areas	0.000103391	〇	○	0.0172662
	Somatosensory areas, layer 1	体積0
	Somatosensory areas, layer 2/3	体積0
	Somatosensory areas, layer 4	体積0
	Somatosensory areas, layer 5	体積0
	Somatosensory areas, layer 6a	体積0
	Somatosensory areas, layer 6b	体積0
	Primary somatosensory area	体積0
	Primary somatosensory area, layer 1	体積0
	Primary somatosensory area, layer 2/3	体積0
	Primary somatosensory area, layer 4	体積0
	Primary somatosensory area, layer 5	体積0
	Primary somatosensory area, layer 6a	体積0
	Primary somatosensory area, layer 6b	体積0
	Primary somatosensory area, nose	0.000296112		○	0.0494507
	Primary somatosensory area, nose, layer 1	0.00123046
	Primary somatosensory area, nose, layer 2/3	0.000546558
	Primary somatosensory area, nose, layer 4	0.00254066
	Primary somatosensory area, nose, layer 5	0.000462375
	Primary somatosensory area, nose, layer 6a	0.000302916
	Primary somatosensory area, nose, layer 6b	0.000807519
	Primary somatosensory area, barrel field	0.000145622	〇	○	0.0243189
	Primary somatosensory area, barrel field, layer 1	0.00458875
	Primary somatosensory area, barrel field, layer 2/3	0.000376403
	Primary somatosensory area, barrel field, layer 4	0.000122349	〇	○	0.0204323
	Primary somatosensory area, barrel field, layer 5	0.000190845	〇	○	0.031871
	Primary somatosensory area, barrel field, layer 6a	4.82925e-05	◎	◎	0.00806484
	Primary somatosensory area, barrel field, layer 6b	5.33444e-05	◎	◎	0.00890852
	Primary somatosensory area, lower limb	8.40369e-05	〇	○	0.0140342
	Primary somatosensory area, lower limb, layer 1	0.00011971	〇	○	0.0199915
	Primary somatosensory area, lower limb, layer 2/3	0.000175906	〇	○	0.0293763
	Primary somatosensory area, lower limb, layer 4	0.000125463	〇	○	0.0209523
	Primary somatosensory area, lower limb, layer 5	0.000273153	〇	○	0.0456165
	Primary somatosensory area, lower limb, layer 6a	0.000159411	〇	○	0.0266216
	Primary somatosensory area, lower limb, layer 6b	0.000747388
	Primary somatosensory area, mouth	0.000207727	〇	○	0.0346903
	Primary somatosensory area, mouth, layer 1	0.000190548	〇	○	0.0318215
	Primary somatosensory area, mouth, layer 2/3	0.000325882
	Primary somatosensory area, mouth, layer 4	0.000150042	〇	○	0.0250571
	Primary somatosensory area, mouth, layer 5	0.000435273
	Primary somatosensory area, mouth, layer 6a	0.00052427
	Primary somatosensory area, mouth, layer 6b	0.000538455
	Primary somatosensory area, upper limb	5.49763e-05	◎	◎	0.00918104
	Primary somatosensory area, upper limb, layer 1	0.000487637
	Primary somatosensory area, upper limb, layer 2/3	0.000133189	〇	○	0.0222425
	Primary somatosensory area, upper limb, layer 4	0.000187743	〇	○	0.0313531
	Primary somatosensory area, upper limb, layer 5	0.000212427	〇	○	0.0354752
	Primary somatosensory area, upper limb, layer 6a	4.73853e-05	◎	◎	0.00791334
	Primary somatosensory area, upper limb, layer 6b	0.000110024	〇	○	0.018374
	Primary somatosensory area, trunk	0.000328417
	Primary somatosensory area, trunk, layer 1	0.00203166
	Primary somatosensory area, trunk, layer 2/3	0.000406021
	Primary somatosensory area, trunk, layer 4	0.000189175	〇	○	0.0315922
	Primary somatosensory area, trunk, layer 5	0.000614219
	Primary somatosensory area, trunk, layer 6a	0.000478168
	Primary somatosensory area, trunk, layer 6b	0.00106877
	Primary somatosensory area, unassigned	5.81254e-05	〇	○	0.0101719
	Primary somatosensory area, unassigned, layer 1	2.45757e-05	◎	◎	0.00410414
	Primary somatosensory area, unassigned, layer 2/3	0.000128298	〇	○	0.0214257
	Primary somatosensory area, unassigned, layer 4	0.000588803
	Primary somatosensory area, unassigned, layer 5	0.000235397	〇	○	0.0393113
	Primary somatosensory area, unassigned, layer 6a	1.60066e-05	◎	◎	0.0026731
	Primary somatosensory area, unassigned, layer 6b	1.11566e-05	◎	◎	0.00186315
	Supplemental somatosensory area	0.000639589
	Supplemental somatosensory area, layer 1	0.000790137
	Supplemental somatosensory area, layer 2/3	0.00117557
	Supplemental somatosensory area, layer 4	0.0025868
	Supplemental somatosensory area, layer 5	0.000776003
	Supplemental somatosensory area, layer 6a	0.000380936
	Supplemental somatosensory area, layer 6b	0.000560456
VISC	Visceral area	0.00073393
	Visceral area, layer 1	0.000504684
	Visceral area, layer 2/3	0.00113854
	Visceral area, layer 4	0.00201538
	Visceral area, layer 5	0.000881242
	Visceral area, layer 6a	0.000752608
	Visceral area, layer 6b	0.00448698
VIS	Visual areas	0.00212398
	Visual areas, layer 1	体積0
	Visual areas, layer 2/3	体積0
	Visual areas, layer 4	体積0
	Visual areas, layer 5	体積0
	Visual areas, layer 6a	体積0
	Visual areas, layer 6b	体積0
	Anterolateral visual area	0.000999614
	Anterolateral visual area, layer 1	0.00347934
	Anterolateral visual area, layer 2/3	0.0025067
	Anterolateral visual area, layer 4	0.000643074
	Anterolateral visual area, layer 5	0.00123035
	Anterolateral visual area, layer 6a	0.00040607
	Anterolateral visual area, layer 6b	0.000441933
	Anteromedial visual area	0.00188515
	Anteromedial visual area, layer 1	0.00404882
	Anteromedial visual area, layer 2/3	0.00221989
	Anteromedial visual area, layer 4	0.00865644
	Anteromedial visual area, layer 5	0.00192803
	Anteromedial visual area, layer 6a	0.00117112
	Anteromedial visual area, layer 6b	0.00668606
	Lateral visual area	0.00697134
	Lateral visual area, layer 1	0.0137757
	Lateral visual area, layer 2/3	0.0113843
	Lateral visual area, layer 4	0.00123427
	Lateral visual area, layer 5	0.0138524
	Lateral visual area, layer 6a	0.00609186
	Lateral visual area, layer 6b	0.0211008
	Primary visual area	0.00220238
	Primary visual area, layer 1	0.000811488
	Primary visual area, layer 2/3	0.00190048
	Primary visual area, layer 4	0.00375435
	Primary visual area, layer 5	0.00385064
	Primary visual area, layer 6a	0.00268373
	Primary visual area, layer 6b	0.00245651
	Posterolateral visual area	0.0131708
	Posterolateral visual area, layer 1	0.00285558
	Posterolateral visual area, layer 2/3	0.0162444
	Posterolateral visual area, layer 4	0.0984059
	Posterolateral visual area, layer 5	0.0120152
	Posterolateral visual area, layer 6a	0.0722323
	Posterolateral visual area, layer 6b	0.0171646
	posteromedial visual area	0.00648516
	posteromedial visual area, layer 1	0.470579
	posteromedial visual area, layer 2/3	0.00609544
	posteromedial visual area, layer 4	0.00107232
	posteromedial visual area, layer 5	0.00568573
	posteromedial visual area, layer 6a	0.014217
	posteromedial visual area, layer 6b	0.0096581
RSP	Retrosplenial area	0.000265053	〇	○	0.0442638
	Retrosplenial area, lateral agranular part	0.00159196
	Retrosplenial area, lateral agranular part, layer 1	0.000910028
	Retrosplenial area, lateral agranular part, layer 2/3	0.00526503
	Retrosplenial area, lateral agranular part, layer 5	0.000891959
	Retrosplenial area, lateral agranular part, layer 6a	0.0041223
	Retrosplenial area, lateral agranular part, layer 6b	0.015176
	Retrosplenial area, dorsal part	0.0011968
	Retrosplenial area, dorsal part, layer 1	0.0841831
	Retrosplenial area, dorsal part, layer 2/3	0.00198656
	Retrosplenial area, dorsal part, layer 4	体積0
	Retrosplenial area, dorsal part, layer 5	0.000348933
	Retrosplenial area, dorsal part, layer 6a	0.000424161
	Retrosplenial area, dorsal part, layer 6b	0.00127191
	Retrosplenial area, ventral part	0.000293236		○	0.0489705
	Retrosplenial area, ventral part, layer 1	0.000873042
	Retrosplenial area, ventral part, layer 2	0.0029131
	Retrosplenial area, ventral part, layer 2/3	0.000232834	〇	○	0.0388833
	Retrosplenial area, ventral part, layer 5	0.000897857
	Retrosplenial area, ventral part, layer 6a	0.000501204
	Retrosplenial area, ventral part, layer 6b	0.000332202
TEa	Temporal association areas	0.00158604
	Temporal association areas, layer 1	0.00174429
	Temporal association areas, layer 2/3	0.000383066
	Temporal association areas, layer 4	0.00725685
	Temporal association areas, layer 5	0.00606071
	Temporal association areas, layer 6a	0.000827082
	Temporal association areas, layer 6b	0.00266322
ECT	Ectorhinal area	0.00204754
	Ectorhinal area/Layer 1	0.000154983	〇	○	0.0258821
	Ectorhinal area/Layer 2/3	0.00294505
	Ectorhinal area/Layer 5	0.00325398
	Ectorhinal area/Layer 6a	0.0124189
	Ectorhinal area/Layer 6b	0.00744747
OLF peri	(アトラスで対応する箇所が見つけられず)
CTXsp	Cortical subplate	0.00316292
	Layer 6b, isocortex	体積0
	Claustrum	0.000543812
	Endopiriform nucleus	0.00180381
	Endopiriform nucleus, dorsal part	0.00149032
	Endopiriform nucleus, ventral part	0.00431446
	Lateral amygdalar nucleus	0.00102968
	Basolateral amygdalar nucleus	0.00619988
	Basolateral amygdalar nucleus, anterior part	0.00507779
	Basolateral amygdalar nucleus, posterior part	0.00813503
	Basolateral amygdalar nucleus, ventral part	0.0513084
	Basomedial amygdalar nucleus	0.0184389
	Basomedial amygdalar nucleus, anterior part	0.0259381
	Basomedial amygdalar nucleus, posterior part	0.0205545
	Posterior amygdalar nucleus	0.128369

## Sheet: resion per WBV (shiohama)
region	WT 1	WT 2	WT 3	WT 4	hemi 1	hemi 2	hemi 3	hemi 4		WT %volume ave	hemi %volume ave	T.TEST
root	76.8979	76.9629	58.469	76.0036	76.6376	47.4284	68.8386	76.3762		72.0833	67.3202	0.584202
Basic cell groups and regions	81.7676	81.5861	62.2886	80.4235	81.2583	50.4451	73.0868	80.7346		76.5164	71.3812	0.574288
Cerebrum	51.5763	50.9742	40.6305	50.0738	50.8361	32.0483	45.6539	50.5908		48.3137	44.7823	0.515221
Cerebral cortex	41.4392	41.576	32.7603	40.486	41.4289	25.8515	37.4087	41.0894		39.0654	36.4446	0.557031
Cortical plate	39.6924	39.9246	31.3933	38.7776	39.7535	24.7289	35.8485	39.3679		37.447	34.9247	0.556956
Isocortex	25.3551	25.0119	20.7868	22.7989	24.5356	15.9296	21.9711	23.1461		23.4882	21.3956	0.372935
Frontal pole, cerebral cortex	0.106512	0.114607	0.0858293	0.109679	0.110493	0.0442748	0.109725	0.112463		0.104157	0.0942388	0.598094
Frontal pole, layer 1	0.0889431	0.0967993	0.0704544	0.092138	0.091882	0.0365289	0.0917725	0.0950876		0.0870837	0.0788177	0.607372
Frontal pole, layer 2/3	0.017569	0.0178079	0.0153749	0.0175411	0.0186107	0.00774589	0.0179526	0.0173752		0.0170732	0.0154211	0.553472
Somatomotor areas	4.91065	4.91876	4.05062	4.28767	4.76992	2.99854	4.32979	4.42127		4.54192	4.12988	0.392262
Somatomotor areas, Layer 1	0	0	0	0	0	0	0	0		0	0	#DIV/0!
Somatomotor areas, Layer 2/3	0	0	0	0	0	0	0	0		0	0	#DIV/0!
Somatomotor areas, Layer 5	0	0	0	0	0	0	0	0		0	0	#DIV/0!
Somatomotor areas, Layer 6a	0	0	0	0	0	0	0	0		0	0	#DIV/0!
Somatomotor areas, Layer 6b	0	0	0	0	0	0	0	0		0	0	#DIV/0!
Primary motor area	2.63952	2.61219	2.1682	2.30486	2.52194	1.59609	2.30115	2.32471		2.43119	2.18597	0.334193
Primary motor area, Layer 1	0.381357	0.384013	0.327351	0.354123	0.381714	0.250773	0.343778	0.340007		0.361711	0.329068	0.329527
Primary motor area, Layer 2/3	0.910074	0.90462	0.751682	0.819811	0.883811	0.563425	0.798354	0.82556		0.846547	0.767787	0.362367
Primary motor area, Layer 5	0.825853	0.816974	0.680636	0.708529	0.785552	0.486494	0.723596	0.733805		0.757998	0.682362	0.359859
Primary motor area, Layer 6a	0.45888	0.451067	0.36545	0.366477	0.418675	0.261424	0.387856	0.377851		0.410469	0.361451	0.297884
Primary motor area, Layer 6b	0.0633582	0.0555128	0.0430836	0.0559241	0.0521879	0.0339763	0.0475609	0.0474843		0.0544697	0.0453024	0.162267
Secondary motor area	2.27112	2.30657	1.88242	1.98281	2.24799	1.40245	2.02864	2.09657		2.11073	1.94391	0.464968
Secondary motor area, layer 1	0.459429	0.46201	0.37204	0.410236	0.448478	0.282461	0.388928	0.422479		0.425929	0.385586	0.37773
Secondary motor area, layer 2/3	0.760408	0.769519	0.629612	0.67024	0.748331	0.463257	0.669336	0.688225		0.707445	0.642287	0.393233
Secondary motor area, layer 5	0.70858	0.737386	0.605536	0.626953	0.719959	0.449173	0.665183	0.686678		0.669614	0.630248	0.589505
Secondary motor area, layer 6a	0.318438	0.317756	0.258333	0.258118	0.308572	0.195232	0.286839	0.282883		0.288161	0.268381	0.539586
Secondary motor area, layer 6b	0.0242672	0.0198971	0.0168955	0.0172582	0.0226451	0.012323	0.0183545	0.0163041		0.0195795	0.0174067	0.457924
Somatosensory areas	8.18858	7.8679	6.4704	7.12905	7.62217	5.0056	6.70127	6.96162		7.41398	6.57267	0.260438
Somatosensory areas, layer 1	0	0	0	0	0	0	0	0		0	0	#DIV/0!
Somatosensory areas, layer 2/3	0	0	0	0	0	0	0	0		0	0	#DIV/0!
Somatosensory areas, layer 4	0	0	0	0	0	0	0	0		0	0	#DIV/0!
Somatosensory areas, layer 5	0	0	0	0	0	0	0	0		0	0	#DIV/0!
Somatosensory areas, layer 6a	0	0	0	0	0	0	0	0		0	0	#DIV/0!
Somatosensory areas, layer 6b	0	0	0	0	0	0	0	0		0	0	#DIV/0!
Primary somatosensory area	6.88485	6.60274	5.43664	5.92314	6.38098	4.19968	5.63108	5.76928		6.21185	5.49526	0.252553
Primary somatosensory area, layer 1	0	0	0	0	0	0	0	0		0	0	#DIV/0!
Primary somatosensory area, layer 2/3	0	0	0	0	0	0	0	0		0	0	#DIV/0!
Primary somatosensory area, layer 4	0	0	0	0	0	0	0	0		0	0	#DIV/0!
Primary somatosensory area, layer 5	0	0	0	0	0	0	0	0		0	0	#DIV/0!
Primary somatosensory area, layer 6a	0	0	0	0	0	0	0	0		0	0	#DIV/0!
Primary somatosensory area, layer 6b	0	0	0	0	0	0	0	0		0	0	#DIV/0!
Primary somatosensory area, nose	0.318877	0.313677	0.258502	0.284241	0.308312	0.190302	0.275451	0.289547		0.293824	0.265903	0.382196
Primary somatosensory area, nose, layer 1	0.0354674	0.037108	0.0288069	0.0312156	0.0339677	0.0227095	0.0308141	0.0330843		0.0331495	0.0301439	0.383402
Primary somatosensory area, nose, layer 2/3	0.0850998	0.088542	0.0703699	0.0798781	0.0869365	0.053429	0.0744898	0.0741421		0.0809724	0.0722494	0.316941
Primary somatosensory area, nose, layer 4	0.0362361	0.0361132	0.0307499	0.0344221	0.0365706	0.0230616	0.0328237	0.0366545		0.0343803	0.0322776	0.564056
Primary somatosensory area, nose, layer 5	0.0835626	0.0804837	0.0666529	0.0737481	0.0771757	0.0481477	0.0711404	0.0775934		0.0761118	0.0685143	0.373307
Primary somatosensory area, nose, layer 6a	0.0648955	0.0588953	0.0505176	0.053755	0.0599966	0.0349445	0.0542597	0.0564099		0.0570159	0.0514027	0.416378
Primary somatosensory area, nose, layer 6b	0.013616	0.0125352	0.0114045	0.0112225	0.0136652	0.00800995	0.0119237	0.0116628		0.0121945	0.0113154	0.527627
Primary somatosensory area, barrel field	2.26794	2.16411	1.77952	1.99837	2.12331	1.40632	1.82058	1.89449		2.05248	1.81117	0.236835
Primary somatosensory area, barrel field, layer 1	0.219503	0.219166	0.152482	0.196913	0.211224	0.142067	0.174837	0.185772		0.197016	0.178475	0.417495
Primary somatosensory area, barrel field, layer 2/3	0.649284	0.622281	0.533645	0.584515	0.635105	0.416869	0.528931	0.551722		0.597431	0.533157	0.258465
Primary somatosensory area, barrel field, layer 4	0.324587	0.315767	0.262472	0.286788	0.30636	0.199721	0.266475	0.275504		0.297403	0.262015	0.230923
Primary somatosensory area, barrel field, layer 5	0.545957	0.530157	0.441734	0.476439	0.512899	0.338354	0.443187	0.467345		0.498572	0.440447	0.235833
Primary somatosensory area, barrel field, layer 6a	0.442958	0.403811	0.329547	0.381283	0.389652	0.262304	0.344716	0.352145		0.3894	0.337204	0.194934
Primary somatosensory area, barrel field, layer 6b	0.0856489	0.0729228	0.0596412	0.0724278	0.0680655	0.0470034	0.0624321	0.0620033		0.0726602	0.0598761	0.116109
Primary somatosensory area, lower limb	0.726149	0.703958	0.576982	0.61243	0.674539	0.444332	0.600741	0.592066		0.65488	0.57792	0.247218
Primary somatosensory area, lower limb, layer 1	0.0788409	0.078494	0.0625135	0.0727107	0.0767852	0.0509644	0.0703366	0.0640264		0.0731398	0.0655282	0.299178
Primary somatosensory area, lower limb, layer 2/3	0.189745	0.190017	0.158311	0.169658	0.184935	0.12235	0.166396	0.165183		0.176933	0.159716	0.306014
Primary somatosensory area, lower limb, layer 4	0.070825	0.0699382	0.0576138	0.0605451	0.067545	0.0437466	0.0627	0.0620033		0.0647305	0.0589987	0.390679
Primary somatosensory area, lower limb, layer 5	0.206106	0.202751	0.168533	0.171639	0.192484	0.129215	0.171487	0.172443		0.187257	0.166407	0.256352
Primary somatosensory area, lower limb, layer 6a	0.149995	0.1353	0.109905	0.115149	0.128322	0.0815959	0.108385	0.106869		0.127587	0.106293	0.160999
Primary somatosensory area, lower limb, layer 6b	0.0306359	0.027458	0.0201057	0.022728	0.0244672	0.01646	0.0214359	0.0215405		0.0252319	0.0209759	0.190489
Primary somatosensory area, mouth	0.699795	0.65143	0.551555	0.585175	0.630029	0.395656	0.566042	0.611821		0.621989	0.550887	0.301754
Primary somatosensory area, mouth, layer 1	0.0816958	0.0820754	0.0637806	0.0711075	0.0758742	0.0499962	0.068327	0.0696198		0.0746649	0.0659543	0.266786
Primary somatosensory area, mouth, layer 2/3	0.189745	0.184645	0.151384	0.164472	0.177777	0.110907	0.159028	0.171134		0.172561	0.154711	0.348258
Primary somatosensory area, mouth, layer 4	0.0757663	0.0704356	0.060317	0.0654491	0.0680655	0.0446269	0.0613603	0.0666446		0.067992	0.0601743	0.262196
Primary somatosensory area, mouth, layer 5	0.201275	0.184048	0.156115	0.162302	0.177647	0.112051	0.159965	0.176251		0.175935	0.156479	0.333694
Primary somatosensory area, mouth, layer 6a	0.127265	0.109633	0.101542	0.102323	0.110102	0.0660161	0.100213	0.108297		0.110191	0.0961572	0.282406
Primary somatosensory area, mouth, layer 6b	0.0240476	0.0205935	0.0184161	0.0195216	0.0205628	0.0120589	0.0171487	0.0198744		0.0206447	0.0174112	0.206381
Primary somatosensory area, upper limb	1.24389	1.16945	0.970057	1.02182	1.11052	0.749326	1.00695	1.00586		1.1013	0.968165	0.230724
Primary somatosensory area, upper limb, layer 1	0.131218	0.130923	0.0984165	0.120902	0.122856	0.0855568	0.111199	0.100919		0.120365	0.105133	0.21697
Primary somatosensory area, upper limb, layer 2/3	0.355004	0.341533	0.283591	0.300274	0.326532	0.226831	0.297021	0.30002		0.320101	0.287601	0.276678
Primary somatosensory area, upper limb, layer 4	0.143956	0.136593	0.110412	0.117129	0.129884	0.0881094	0.116022	0.118889		0.127023	0.113226	0.290483
Primary somatosensory area, upper limb, layer 5	0.346658	0.325218	0.276833	0.276414	0.311175	0.202625	0.282418	0.290023		0.306281	0.27156	0.285554
Primary somatosensory area, upper limb, layer 6a	0.222687	0.199369	0.170138	0.172299	0.184415	0.12367	0.169612	0.167088		0.191123	0.161196	0.148483
Primary somatosensory area, upper limb, layer 6b	0.0443617	0.0358147	0.0306654	0.0347993	0.0356596	0.0225335	0.0306801	0.028919		0.0364103	0.0294481	0.128552
Primary somatosensory area, trunk	0.972554	0.973066	0.771534	0.854139	0.940163	0.626801	0.811483	0.807114		0.892823	0.79639	0.278924
Primary somatosensory area, trunk, layer 1	0.105524	0.103166	0.0772971	0.0915722	0.102814	0.0701531	0.0869494	0.0906843		0.0943898	0.0876502	0.497704
Primary somatosensory area, trunk, layer 2/3	0.284728	0.293581	0.233327	0.269624	0.285016	0.187838	0.251872	0.2448		0.270315	0.242381	0.291613
Primary somatosensory area, trunk, layer 4	0.112442	0.113314	0.0910669	0.10072	0.109712	0.0729698	0.0991411	0.0977058		0.104386	0.0948821	0.351305
Primary somatosensory area, trunk, layer 5	0.255409	0.256573	0.207055	0.210588	0.241158	0.161079	0.208062	0.208145		0.232406	0.204611	0.241357
Primary somatosensory area, trunk, layer 6a	0.175141	0.167036	0.134319	0.147496	0.164893	0.110203	0.134912	0.135074		0.155998	0.136271	0.223324
Primary somatosensory area, trunk, layer 6b	0.0393106	0.0393962	0.028469	0.0341392	0.0365706	0.024558	0.0305462	0.0307041		0.0353287	0.0305947	0.2332
Primary somatosensory area, unassigned	0.655653	0.627056	0.528492	0.566974	0.594109	0.386942	0.549831	0.568383		0.594544	0.524817	0.251557
Primary somatosensory area, unassigned, layer 1	0.0741192	0.0712315	0.0621756	0.0671466	0.0683258	0.0468274	0.0655135	0.0629554		0.0686682	0.0609055	0.205873
Primary somatosensory area, unassigned, layer 2/3	0.183706	0.177979	0.14961	0.162491	0.172962	0.112315	0.149917	0.156377		0.168447	0.147893	0.218489
Primary somatosensory area, unassigned, layer 4	0.0574287	0.0572041	0.0470541	0.0487568	0.0541401	0.0353846	0.0494366	0.0526016		0.0526109	0.0478907	0.388946
Primary somatosensory area, unassigned, layer 5	0.20951	0.200662	0.168617	0.176826	0.182463	0.118213	0.174301	0.1872		0.188904	0.165544	0.257925
Primary somatosensory area, unassigned, layer 6a	0.115626	0.105554	0.088955	0.0985509	0.102033	0.0649598	0.0973994	0.0977058		0.102171	0.0905246	0.299932
Primary somatosensory area, unassigned, layer 6b	0.0152631	0.0144254	0.0120803	0.013203	0.0141857	0.00924225	0.0132635	0.0115438		0.0137429	0.0120588	0.239919
Supplemental somatosensory area	1.30373	1.26516	1.03375	1.2059	1.24119	0.805924	1.07019	1.19234		1.20214	1.07741	0.316592
Supplemental somatosensory area, layer 1	0.149995	0.15072	0.118438	0.132218	0.148235	0.0906621	0.127142	0.135788		0.137843	0.125457	0.429015
Supplemental somatosensory area, layer 2/3	0.317669	0.30343	0.256221	0.295181	0.31521	0.204914	0.260178	0.290023		0.293125	0.267581	0.382682
Supplemental somatosensory area, layer 4	0.158999	0.159972	0.119789	0.142404	0.150707	0.0997283	0.126874	0.147689		0.145291	0.13125	0.387295
Supplemental somatosensory area, layer 5	0.319207	0.309897	0.256052	0.297444	0.302456	0.198928	0.265135	0.297878		0.29565	0.266099	0.326271
Supplemental somatosensory area, layer 6a	0.286924	0.270202	0.223021	0.26953	0.258727	0.168121	0.230034	0.25444		0.262419	0.22783	0.21568
Supplemental somatosensory area, layer 6b	0.0709348	0.0709331	0.0602326	0.0691271	0.0658531	0.0435706	0.0608244	0.0665256		0.0678069	0.0591934	0.197273
Gustatory areas	0.504779	0.471561	0.398988	0.459181	0.475938	0.294256	0.413579	0.468416		0.458627	0.413047	0.3736
Gustatory areas, layer 1	0.0857587	0.0828713	0.0692717	0.0779919	0.0822513	0.0486758	0.0687289	0.0747372		0.0789734	0.0685983	0.244835
Gustatory areas, layer 2/3	0.122214	0.113811	0.0964735	0.109208	0.114137	0.069801	0.0984712	0.112225		0.110427	0.0986584	0.347865
Gustatory areas, layer 4	0.0331615	0.0313379	0.0272863	0.0313099	0.0318854	0.0198048	0.0292064	0.0323702		0.0307739	0.0283167	0.468214
Gustatory areas, layer 5	0.134513	0.123362	0.105597	0.123919	0.126891	0.0791313	0.108385	0.125316		0.121848	0.109931	0.380919
Gustatory areas, layer 6a	0.108598	0.101972	0.0859138	0.0984566	0.103205	0.0645197	0.0915045	0.105679		0.0987353	0.091227	0.503729
Gustatory areas, layer 6b	0.0205338	0.0182058	0.0144457	0.0182956	0.0175695	0.012323	0.0172827	0.0180893		0.0178702	0.0163161	0.431151
Visceral area	0.40255	0.377646	0.309273	0.357424	0.384577	0.236073	0.327166	0.364879		0.361723	0.328174	0.415976
Visceral area, layer 1	0.0690681	0.0663567	0.0544881	0.0601679	0.0688464	0.0402258	0.0588148	0.0612892		0.0625202	0.0572941	0.477254
Visceral area, layer 2/3	0.0959707	0.0899348	0.0729042	0.0827073	0.0905805	0.0580061	0.0758295	0.086995		0.0853792	0.0778528	0.427563
Visceral area, layer 4	0.0404087	0.0401921	0.0321015	0.037157	0.037872	0.0256142	0.0329577	0.0389157		0.0374648	0.0338399	0.352706
Visceral area, layer 5	0.098057	0.0901337	0.0740869	0.0866682	0.0921423	0.0558936	0.0789109	0.0887801		0.0872365	0.0789317	0.419252
Visceral area, layer 6a	0.0836724	0.0759073	0.0638651	0.0768603	0.0800388	0.0472675	0.067925	0.0737851		0.0750763	0.0672541	0.377673
Visceral area, layer 6b	0.0153729	0.0151218	0.0118269	0.0138631	0.0150968	0.00906621	0.0127276	0.015114		0.0140462	0.0130011	0.547609
Auditory areas	1.57232	1.51705	1.2811	1.47025	1.47193	0.988393	1.27664	1.45559		1.46018	1.29814	0.255433
Dorsal auditory area	0.503791	0.493248	0.417066	0.464839	0.478281	0.319606	0.413311	0.458658		0.469736	0.417464	0.242358
Dorsal auditory area, layer 1	0.0625896	0.0602881	0.0518693	0.0558298	0.0601267	0.0417222	0.0535898	0.0537917		0.0576442	0.0523076	0.282381
Dorsal auditory area, layer 2/3	0.142309	0.143259	0.118353	0.137405	0.140296	0.09031	0.11562	0.135193		0.135332	0.120355	0.28422
Dorsal auditory area, layer 4	0.0554522	0.0590943	0.0494194	0.0535664	0.0559621	0.0360888	0.0486327	0.0554578		0.0543831	0.0490354	0.330101
Dorsal auditory area, layer 5	0.136819	0.127441	0.114805	0.122599	0.128583	0.0836204	0.109055	0.119365		0.125416	0.110156	0.205206
Dorsal auditory area, layer 6a	0.0797193	0.0795883	0.0613308	0.0712961	0.070278	0.0509644	0.0649776	0.0715239		0.0729836	0.064436	0.231061
Dorsal auditory area, layer 6b	0.0269025	0.023578	0.0212884	0.0241426	0.0230356	0.0169001	0.0214359	0.0233256		0.0239779	0.0211743	0.186445
Primary auditory area	0.534207	0.509465	0.433962	0.499356	0.498844	0.330785	0.429656	0.488886		0.494247	0.437043	0.24225
Primary auditory area, layer 1	0.066323	0.0621784	0.0570224	0.0614882	0.0632502	0.0437466	0.0555994	0.0599801		0.061753	0.0556441	0.238722
Primary auditory area, layer 2/3	0.146372	0.13729	0.118776	0.131747	0.14394	0.0918063	0.119639	0.131504		0.133546	0.121722	0.38232
Primary auditory area, layer 4	0.0613817	0.0622778	0.0532209	0.0587533	0.0588253	0.0385534	0.0501064	0.058433		0.0589084	0.0514795	0.200998
Primary auditory area, layer 5	0.15274	0.149725	0.122999	0.139857	0.135611	0.0942709	0.122855	0.143167		0.141331	0.123976	0.219788
Primary auditory area, layer 6a	0.0829037	0.0774991	0.0626824	0.0854422	0.0766551	0.0475316	0.0612263	0.0749752		0.0771319	0.065097	0.206341
Primary auditory area, layer 6b	0.0244868	0.020494	0.0192609	0.0220679	0.0205628	0.0148756	0.0202301	0.0208264		0.0215774	0.0191238	0.224923
Posterior auditory area	0.0350282	0.0350188	0.0299051	0.0332904	0.0325361	0.0222694	0.0282686	0.0334413		0.0333106	0.0291289	0.188694
Posterior auditory area, layer 1	0.00395302	0.00487478	0.00498418	0.00518689	0.00429477	0.00316877	0.00361731	0.00476033		0.00474972	0.00396029	0.127483
Posterior auditory area, layer 2/3	0.0108708	0.0106449	0.00844777	0.00943071	0.0100211	0.00651359	0.00790449	0.00880661		0.00984856	0.00831145	0.149513
Posterior auditory area, layer 4	0.00406283	0.00467581	0.0030412	0.00377228	0.00403448	0.00272866	0.00361731	0.00464132		0.00388803	0.00375544	0.809334
Posterior auditory area, layer 5	0.0105414	0.00984905	0.00954597	0.0100909	0.00924026	0.00624952	0.00830642	0.00916363		0.0100068	0.00823996	0.0512419
Posterior auditory area, layer 6a	0.00439225	0.0040789	0.00321015	0.00358367	0.00377419	0.00272866	0.00401923	0.00464132		0.00381624	0.00379085	0.959246
Posterior auditory area, layer 6b	0.00120787	0.000895368	0.000675821	0.00122599	0.0011713	0.000880214	0.000803847	0.0014281		0.00100126	0.00107086	0.733181
Ventral auditory area	0.499289	0.47932	0.400171	0.472761	0.462273	0.315733	0.405407	0.474605		0.462885	0.414504	0.295138
Ventral auditory area, layer 1	0.0715937	0.0657598	0.0556708	0.0636573	0.0692368	0.0446269	0.0613603	0.0686678		0.0641704	0.0609729	0.645936
Ventral auditory area, layer 2/3	0.111124	0.110429	0.0936857	0.110905	0.105287	0.0762266	0.0935142	0.106988		0.106536	0.095504	0.231336
Ventral auditory area, layer 4	0.0597346	0.0533242	0.0448576	0.0553582	0.056743	0.032832	0.0475609	0.0564099		0.0533187	0.0483865	0.471114
Ventral auditory area, layer 5	0.144505	0.138583	0.118269	0.134953	0.130275	0.0933027	0.118701	0.137574		0.134078	0.119963	0.254842
Ventral auditory area, layer 6a	0.0885038	0.0878456	0.0683424	0.0858194	0.0787374	0.0555415	0.0653795	0.0821157		0.0826278	0.0704435	0.168964
Ventral auditory area, layer 6b	0.023828	0.0233791	0.0193454	0.0220679	0.0219944	0.0132032	0.0188904	0.0228496		0.0221551	0.0192344	0.270123
Visual areas	2.19591	2.25613	1.97027	2.13125	2.24213	1.46459	2.00493	2.18499		2.13839	1.97416	0.415025
Visual areas, layer 1	0	0	0	0	0	0	0	0		0	0	#DIV/0!
Visual areas, layer 2/3	0	0	0	0	0	0	0	0		0	0	#DIV/0!
Visual areas, layer 4	0	0	0	0	0	0	0	0		0	0	#DIV/0!
Visual areas, layer 5	0	0	0	0	0	0	0	0		0	0	#DIV/0!
Visual areas, layer 6a	0	0	0	0	0	0	0	0		0	0	#DIV/0!
Visual areas, layer 6b	0	0	0	0	0	0	0	0		0	0	#DIV/0!
Anterolateral visual area	0.366314	0.368096	0.320677	0.349125	0.355555	0.23	0.302246	0.342387		0.351053	0.307547	0.200937
Anterolateral visual area, layer 1	0.0466677	0.0470566	0.0437594	0.0447959	0.0491946	0.0315997	0.0403263	0.044033		0.0455699	0.0412884	0.301437
Anterolateral visual area, layer 2/3	0.0992648	0.10237	0.0891239	0.101474	0.101383	0.0646957	0.084136	0.0959206		0.0980584	0.0865337	0.232244
Anterolateral visual area, layer 4	0.042495	0.0439725	0.0374236	0.0407406	0.0411256	0.0258783	0.0360391	0.0392727		0.0411579	0.0355789	0.180346
Anterolateral visual area, layer 5	0.106951	0.10436	0.0912359	0.0996826	0.100341	0.0672484	0.084136	0.0997289		0.100557	0.0878636	0.188417
Anterolateral visual area, layer 6a	0.0533658	0.05412	0.0451955	0.0489454	0.0493247	0.0314236	0.0450154	0.0491504		0.0504067	0.0437286	0.205573
Anterolateral visual area, layer 6b	0.017569	0.0162161	0.0139388	0.0134859	0.0141857	0.00915423	0.0125936	0.014281		0.0153025	0.0125536	0.123857
Anteromedial visual area	0.332713	0.33049	0.295925	0.310553	0.341889	0.220318	0.290055	0.317038		0.31742	0.292325	0.399
Anteromedial visual area, layer 1	0.0536953	0.0547169	0.0490815	0.0496055	0.0564827	0.0377612	0.0494366	0.0529587		0.0517748	0.0491598	0.565797
Anteromedial visual area, layer 2/3	0.0867469	0.0845626	0.0805072	0.0821414	0.0866762	0.0567738	0.0764994	0.0828297		0.0834895	0.0756948	0.294433
Anteromedial visual area, layer 4	0.0337105	0.0350188	0.0313412	0.0348936	0.0390433	0.0237658	0.0334936	0.0345124		0.033741	0.0327038	0.76565
Anteromedial visual area, layer 5	0.0890529	0.0874476	0.0763678	0.0795952	0.0892791	0.0573019	0.0767674	0.086043		0.0831159	0.0773478	0.488091
Anteromedial visual area, layer 6a	0.052158	0.0504391	0.0439284	0.0493226	0.0528386	0.0330961	0.0412641	0.0453421		0.048962	0.0431352	0.241394
Anteromedial visual area, layer 6b	0.0173494	0.0183053	0.0146991	0.0149948	0.0175695	0.0116188	0.0125936	0.0153521		0.0163372	0.0142835	0.250443
Lateral visual area	0.142638	0.153406	0.129335	0.149854	0.145762	0.10008	0.131027	0.151378		0.143808	0.132062	0.389391
Lateral visual area, layer 1	0.0163611	0.017211	0.0157973	0.0174468	0.0191312	0.012235	0.0168808	0.0171372		0.0167041	0.016346	0.820334
Lateral visual area, layer 2/3	0.0422754	0.0446689	0.0386063	0.0429097	0.0425572	0.0296632	0.0376468	0.0462942		0.0421151	0.0390404	0.450651
Lateral visual area, layer 4	0.0174592	0.0185043	0.0139388	0.0167867	0.0167886	0.0103865	0.0151391	0.0163041		0.0166722	0.0146546	0.29538
Lateral visual area, layer 5	0.0377733	0.04059	0.0338755	0.0413065	0.0386529	0.028783	0.0355032	0.0404628		0.0383864	0.0358505	0.440789
Lateral visual area, layer 6a	0.0221809	0.0250703	0.0211194	0.0246141	0.0219944	0.0147876	0.0195603	0.0234446		0.0232462	0.0199467	0.171028
Lateral visual area, layer 6b	0.00658837	0.00736192	0.00599791	0.00679011	0.00663737	0.00422503	0.0062968	0.00773554		0.00668458	0.00622368	0.578844
Primary visual area	1.05315	1.08817	0.939983	1.02069	1.0815	0.70558	0.968501	1.05191		1.0255	0.951874	0.450244
Primary visual area, layer 1	0.144725	0.144453	0.123591	0.135331	0.14459	0.102545	0.141611	0.141858		0.137025	0.132651	0.710241
Primary visual area, layer 2/3	0.316242	0.320442	0.286971	0.307818	0.318724	0.215388	0.295682	0.313706		0.307868	0.285875	0.41527
Primary visual area, layer 4	0.137368	0.144353	0.124773	0.135425	0.14394	0.0918063	0.124998	0.139835		0.13548	0.125145	0.440264
Primary visual area, layer 5	0.270672	0.288408	0.244985	0.264154	0.284886	0.179476	0.248255	0.276099		0.267055	0.247179	0.465464
Primary visual area, layer 6a	0.149446	0.156789	0.130349	0.146836	0.155002	0.0961194	0.130625	0.14757		0.145855	0.132329	0.378945
Primary visual area, layer 6b	0.0346988	0.0337255	0.0293137	0.0311213	0.0343581	0.0202449	0.0273308	0.0328463		0.0322148	0.028695	0.343521
Posterolateral visual area	0.105085	0.118885	0.0973183	0.106944	0.115048	0.0718255	0.103026	0.116866		0.107058	0.101691	0.652549
Posterolateral visual area, layer 1	0.0151533	0.0152213	0.0125872	0.0149005	0.0131446	0.00818599	0.0137994	0.0152331		0.0144656	0.0125908	0.30082
Posterolateral visual area, layer 2/3	0.0278908	0.0325317	0.0258502	0.0295181	0.0300634	0.0197168	0.0267949	0.0315372		0.0289477	0.0270281	0.543968
Posterolateral visual area, layer 4	0.010761	0.0131321	0.0120803	0.0130144	0.0139255	0.00809797	0.0135314	0.014162		0.0122469	0.0124292	0.91022
Posterolateral visual area, layer 5	0.0310752	0.0361132	0.0282155	0.0295181	0.035139	0.0213892	0.0301443	0.0320132		0.0312305	0.0296714	0.664215
Posterolateral visual area, layer 6a	0.017569	0.0196981	0.0166421	0.0176354	0.0204327	0.0129391	0.0176846	0.0217785		0.0178862	0.0182087	0.880472
Posterolateral visual area, layer 6b	0.00263535	0.00218868	0.00194299	0.00235768	0.0023426	0.00149636	0.0010718	0.00214215		0.00228117	0.00176323	0.164247
posteromedial visual area	0.196004	0.197081	0.187034	0.194084	0.202375	0.136785	0.210072	0.205408		0.193551	0.18866	0.789396
posteromedial visual area, layer 1	0.0236083	0.0255677	0.0301585	0.0246141	0.0244672	0.02447	0.0391205	0.0252297		0.0259872	0.0283218	0.569733
posteromedial visual area, layer 2/3	0.0678603	0.0686449	0.0636117	0.0674295	0.0683258	0.0470034	0.0724802	0.072		0.0668866	0.0649524	0.764051
posteromedial visual area, layer 4	0.0208632	0.0203945	0.0181627	0.0206532	0.0200422	0.0130272	0.0190244	0.0202314		0.0200184	0.0180813	0.327305
posteromedial visual area, layer 5	0.0468873	0.0456638	0.0409717	0.0444186	0.0502358	0.0296632	0.0442116	0.0483173		0.0444853	0.043107	0.78476
posteromedial visual area, layer 6a	0.0340399	0.0335266	0.0314257	0.0343278	0.0367007	0.020597	0.0329577	0.0368926		0.03333	0.031787	0.705633
posteromedial visual area, layer 6b	0.00274516	0.00328302	0.00270328	0.0026406	0.00260289	0.00202449	0.00227757	0.00273719		0.00284301	0.00241053	0.0953834
Anterior cingulate area	1.12079	1.12339	0.901208	0.897426	1.10076	0.663153	0.957381	0.952661		1.0107	0.918489	0.442105
Anterior cingulate area, layer 1	0	0	0	0	0	0	0	0		0	0	#DIV/0!
Anterior cingulate area, layer 2/3	0	0	0	0	0	0	0	0		0	0	#DIV/0!
Anterior cingulate area, layer 5	0	0	0	0	0	0	0	0		0	0	#DIV/0!
Anterior cingulate area, layer 6a	0	0	0	0	0	0	0	0		0	0	#DIV/0!
Anterior cingulate area, layer 6b	0	0	0	0	0	0	0	0		0	0	#DIV/0!
Anterior cingulate area, dorsal part	0.617001	0.64188	0.521143	0.525007	0.636276	0.386414	0.543534	0.576		0.576258	0.535556	0.534105
Anterior cingulate area, dorsal part, layer 1	0.165917	0.179571	0.140064	0.151174	0.190922	0.104922	0.153267	0.165302		0.159182	0.153603	0.789461
Anterior cingulate area, dorsal part, layer 2/3	0.20995	0.214888	0.177741	0.165603	0.197689	0.132472	0.171755	0.198149		0.192046	0.175016	0.41862
Anterior cingulate area, dorsal part, layer 5	0.150544	0.157983	0.137361	0.141744	0.166325	0.100961	0.14496	0.143762		0.146908	0.139002	0.604024
Anterior cingulate area, dorsal part, layer 6a	0.0811468	0.0807821	0.0595567	0.0587533	0.0723603	0.0425143	0.0673891	0.0615273		0.0700597	0.0609478	0.354021
Anterior cingulate area, dorsal part, layer 6b	0.00944334	0.00865523	0.0064203	0.00773318	0.00897997	0.00554535	0.00616282	0.0072595		0.00806301	0.00698691	0.320765
Anterior cingulate area, ventral part	0.503791	0.481509	0.380065	0.372419	0.464486	0.276739	0.413847	0.376661		0.434446	0.382933	0.362195
Anterior cingulate area, ventral part, layer 1	0.156584	0.156292	0.127646	0.128258	0.166975	0.0933027	0.139467	0.135788		0.142195	0.133883	0.647806
Anterior cingulate area, ventral part, layer 2/3	0.166686	0.16246	0.126716	0.119864	0.130144	0.0932147	0.131965	0.119603		0.143932	0.118732	0.143584
Anterior cingulate area, ventral part, layer 5	0.118042	0.111125	0.0828726	0.0805382	0.114527	0.0573019	0.0975334	0.0847339		0.0981444	0.0885241	0.555717
Anterior cingulate area, ventral part, 6a	0.0517187	0.0431766	0.0359875	0.0362139	0.0451601	0.0268465	0.0363071	0.028919		0.0417742	0.0343082	0.228332
Anterior cingulate area, ventral part, 6b	0.010761	0.00845626	0.00684269	0.00754456	0.00767852	0.00607348	0.00857436	0.00761653		0.00840113	0.00748572	0.394693
Prelimbic area	0.395632	0.396648	0.310878	0.340354	0.409434	0.250157	0.379282	0.375828		0.360878	0.353675	0.867003
Prelimbic area, layer 1	0.0999237	0.102171	0.0828726	0.0925152	0.112445	0.0625832	0.0984712	0.0975868		0.0943707	0.0927715	0.893763
Prelimbic area, layer 2	0.0516089	0.0494442	0.0363254	0.0361196	0.0422969	0.03292	0.0456853	0.042962		0.0433745	0.0409661	0.646945
Prelimbic area, layer 2/3	0.0914686	0.0933173	0.0696096	0.0767659	0.0901901	0.0565978	0.0830642	0.0874711		0.0827904	0.0793308	0.731509
Prelimbic area, layer 5	0.0935549	0.0919245	0.0736645	0.0870454	0.102163	0.0599426	0.0982033	0.0928264		0.0865473	0.0882839	0.875737
Prelimbic area, layer 6a	0.0562208	0.0567067	0.0465472	0.0451731	0.0596062	0.0358247	0.0506423	0.0529587		0.0511619	0.049758	0.819392
Prelimbic area, layer 6b	0.00285496	0.00308405	0.00185851	0.0027349	0.00273303	0.00228856	0.00321539	0.00202314		0.00263311	0.00256503	0.861791
Infralimbic area	0.36851	0.364912	0.282578	0.331489	0.390954	0.242147	0.362267	0.372734		0.336872	0.342025	0.899837
Infralimbic area, layer 1	0.0676406	0.0590943	0.0488281	0.0513973	0.067545	0.041282	0.0622981	0.0634314		0.0567401	0.0586391	0.80239
Infralimbic area, layer 2	0.0171298	0.0187032	0.0144457	0.017824	0.0191312	0.012411	0.0171487	0.0203504		0.0170257	0.0172603	0.909191
Infralimbic area, layer 2/3	0.0945432	0.0979931	0.0787332	0.0961932	0.108671	0.065664	0.0986052	0.106393		0.0918657	0.0948333	0.794575
Infralimbic area, layer 5	0.100473	0.095307	0.06792	0.0867625	0.0970878	0.0639916	0.0967295	0.0935405		0.0876156	0.0878373	0.984164
Infralimbic area, layer 6a	0.0741192	0.0773996	0.0610773	0.0653548	0.0806896	0.0484998	0.0716763	0.0743801		0.0694877	0.0688115	0.935244
Infralimbic area, layer 6b	0.0146042	0.0164151	0.0115734	0.0139574	0.0178298	0.0102985	0.015809	0.014638		0.0141375	0.0146438	0.796699
Orbital area	0.829367	0.947499	0.751091	0.847349	0.914525	0.608932	0.874719	0.941593		0.843826	0.834942	0.921611
Orbital area, layer 1	0	0	0	0	0	0	0	0		0	0	#DIV/0!
Orbital area, layer 2/3	0	0	0	0	0	0	0	0		0	0	#DIV/0!
Orbital area, layer 5	0	0	0	0	0	0	0	0		0	0	#DIV/0!
Orbital area, layer 6a	0	0	0	0	0	0	0	0		0	0	#DIV/0!
Orbital area, layer 6b	0	0	0	0	0	0	0	0		0	0	#DIV/0!
Orbital area, lateral part	0.349294	0.395753	0.319917	0.357895	0.384577	0.261512	0.360123	0.389633		0.355715	0.348961	0.847771
Orbital area, lateral part, layer 1	0.0648955	0.078295	0.0631048	0.0717677	0.0748331	0.0499962	0.0719443	0.0783074		0.0695157	0.0687702	0.921703
Orbital area, lateral part, layer 2/3	0.140442	0.164151	0.133728	0.149477	0.160728	0.107122	0.149515	0.159709		0.146949	0.144269	0.856966
Orbital area, lateral part, layer 5	0.098606	0.10625	0.085238	0.095816	0.0998208	0.0727937	0.0963276	0.106988		0.0964776	0.0939826	0.781138
Orbital area, lateral part, layer 6a	0.0452402	0.0469571	0.0377615	0.0406463	0.0490645	0.0315117	0.0423359	0.0443901		0.0426513	0.0418255	0.853036
Orbital area, lateral part, layer 6b	0.000109806	9.94854e-05	8.44777e-05	0.000188614	0.000130144	8.80214e-05	0	0.000238016		0.000120596	0.000114046	0.908464
Orbital area, medial part	0.199189	0.219266	0.171152	0.193235	0.221506	0.137754	0.20967	0.222545		0.19571	0.197869	0.926832
Orbital area, medial part, layer 1	0.0511697	0.0501406	0.0390287	0.0465877	0.0525784	0.0340643	0.0502404	0.0561719		0.0467317	0.0482637	0.793856
Orbital area, medial part, layer 2	0.0194357	0.0252693	0.0196833	0.0160322	0.023426	0.0137313	0.0200962	0.0267769		0.0201051	0.0210076	0.79819
Orbital area, medial part, layer 2/3	0.0557816	0.064566	0.0538123	0.0579045	0.0661134	0.0382893	0.057609	0.0600992		0.0580161	0.0555277	0.713173
Orbital area, medial part, layer 5	0.0512795	0.0532247	0.0375081	0.0514917	0.0519276	0.0352966	0.0597526	0.0548628		0.048376	0.0504599	0.757205
Orbital area, medial part, layer 6a	0.021522	0.0260652	0.0211194	0.0212191	0.0274605	0.016372	0.0219718	0.0246347		0.0224814	0.0226097	0.962926
Orbital area, ventral part	0	0	0	0	0	0	0	0		0	0	#DIV/0!
Orbital area, ventrolateral part	0.280884	0.33248	0.260022	0.296218	0.308442	0.209667	0.304926	0.329415		0.292401	0.288113	0.89369
Orbital area, ventrolateral part, layer 1	0.0563306	0.0693413	0.0577827	0.068184	0.0636406	0.0432185	0.0667193	0.0744992		0.0629097	0.0620194	0.909232
Orbital area, ventrolateral part, layer 2/3	0.121885	0.149924	0.111595	0.12788	0.138474	0.0939189	0.135716	0.143881		0.127821	0.127997	0.990402
Orbital area, ventrolateral part, layer 5	0.0517187	0.0595917	0.0468006	0.051586	0.0559621	0.0377612	0.0549295	0.058195		0.0524243	0.051712	0.899277
Orbital area, ventrolateral part, layer 6a	0.0505109	0.0531252	0.0434215	0.0480023	0.0499755	0.0345044	0.047159	0.0521256		0.048765	0.0459411	0.549424
Orbital area, ventrolateral part, layer 6b	0.000439225	0.000497427	0.000422388	0.000565842	0.000390433	0.000264064	0.000401923	0.000714049		0.000481221	0.000442618	0.715667
Agranular insular area	1.05315	1.02281	0.851704	1.00098	1.02241	0.657344	0.894815	1.04001		0.98216	0.903647	0.45776
Agranular insular area, dorsal part	0.514223	0.517523	0.426866	0.495867	0.507693	0.323127	0.443991	0.519709		0.488619	0.44863	0.45195
[truncated: 959 more rows]

## Sheet: 19 area to detail SPSS
No	WT 1	WT 2	WT 3	WT 4	Hemi 1	Hemi 2	Hemi 3	Hemi 4
Category	WT	WT	WT	WT	Hemi	Hemi	Hemi	Hemi
[truncated: 668 more rows]
